# Supplementary material for: Glycerol-3-phosphate acyltransferase 2 expression modulates cell roughness and membrane permeability: An atomic force microscopy study
Source: PLoS One. 2017 Dec 6;12(12):e0189031. doi: 10.1371/journal.pone.0189031 (PMC5718561; doi:10.1371/journal.pone.0189031)
Supplement: S1 File — scr-MDA and sh-MDA cell mRNA expression profile was analyzed using an Agilent SurePrint G3 Human Gene Expression 8x60K v2 Microarray. (XLSX) [file pone.0189031.s001.xlsx]

## Sheet: All_topTableAll
;"Row";"Col";"Start";"Sequence";"ProbeName";"GeneName";"SystematicName";"Description";"Amean";"logFC_SCR-SH";"t_SCR-SH";"P.value_SCR-SH";"adj.P.Val_SCR-SH";"q.value_SCR-SH"
4;1;4;1100;"AAGGGGGAAAATGTGATTTGTGCCTGATCTTTCATCTGTGATTCTTATAAGAGCTTTGTC";"A_23_P117082";"HEBP1";"NM_015987";"ref|Homo sapiens heme binding protein 1 (HEBP1)	mRNA [NM_015987]";13	1205240320153;0	0853952922543932;1	5145475550666;0	164776943836927;0	27525550522593;0	101048745301229
5;1;5;2802;"GCAAGTCTCTCTGCACCTATTAAAAAGTGATGTATATACTTCCTTCTTATTCTGTTGAGT";"A_33_P3246448";"KCNE4";"NM_080671";"ref|Homo sapiens potassium voltage-gated channel	Isk-related family	member 4 (KCNE4)	mRNA [NM_080671]";5	84708558995742;0	369284271464537;2	41291858945547;0	039517951744877;0	0873952090681151;0	320835589261802
8;1;8;1334;"AGAAGACCTAGAAGACTGTTCTGTGTTAACTACACTTCTCAAAGGACCCTCTCCACCAGA";"A_33_P3319925";"IRG1";"ENST00000449753";"ens|immunoresponsive 1 homolog (mouse) [Source:HGNC Symbol;Acc:33904] [ENST00000449753]";5	93803922688266;0	00951433421672032;0	0875341491132663;0	932196873962029;0	956873439706846;0	351276754356226
9;1;9;51;"AGGGGAGGGTTCGAGGGTACGAGTTCGAGGCCAACCGGGTCCACATTGGTTGAGAAAAAA";"A_21_P0000509";"SNAR-G2";"NR_024244";"ref|Homo sapiens small ILF3/NF90-associated RNA G2 (SNAR-G2)	small nuclear RNA [NR_024244]";9	58809033149864;0	691979999280807;8	95073448037719;1	00366332292142e-05;8	36678373130784e-05;3	7.15208e+07
10;1;10;219;"AGTCGTACCCTCTTGTTTTTCTCTGAGTCAGTCTTAAGGTGAAATGAAGTGTGGCCCAGT";"A_21_P0000744";"LOC100506844";"NR_038269";"ref|Homo sapiens uncharacterized LOC100506844 (LOC100506844)	non-coding RNA [NR_038269]";9	28992683631718;-0	643652191896919;-10	7692251264846;2	21668315548848e-06;2	45467529055814e-05;9	1.13314e+06
11;1;11;597;"AAAGAAGTTTTGTAATTTTATATTACTTTTTAGTTTGATACTAAGTATTAAACATATTTC";"A_24_P215804";"CKLF";"NM_016951";"ref|Homo sapiens chemokine-like factor (CKLF)	transcript variant 1	mRNA [NM_016951]";7	40161481195578;0	14044758201639;1	40037440225705;0	195494518250187;0	314189362098139;0	115341710607936
12;1;12;649;"AATATCTGGACCTCAATATTGCCAAGAAACTGAGGCGGCAATTCTAACTTTTTCTCTTCC";"A_23_P110167";"MGST2";"NM_002413";"ref|Homo sapiens microsomal glutathione S-transferase 2 (MGST2)	transcript variant 1	mRNA [NM_002413]";11	5439337013445;0	112273094390547;1	56386686085943;0	152880748229545;0	259532732539921;0	952767755407202
13;1;13;790;"AAGTAGTTATAAAAGCAAACACAGGATTCACCACAGTACTTCACATCGTCGTTCACATGG";"A_33_P3211513";"CLK1";"NM_001162407";"ref|Homo sapiens CDC-like kinase 1 (CLK1)	transcript variant 2	mRNA [NM_001162407]";8	54466746914804;0	158012243146342;1	83243591525504;0	10069313908508;0	18663202486798;0	685142770549049
17;1;17;1079;"ATGATGCACGGTGCTACACCTACCACTGTGTCTGCAGCAACAACACCTGCCACCAGCGTT";"A_33_P3414202";"MBNL3";"NM_001170704";"ref|Homo sapiens muscleblind-like 3 (Drosophila) (MBNL3)	transcript variant 6	mRNA [NM_001170704]";7	5788732361538;0	562613053909499;6	94515060962003;7	32498199394309e-05;0	000422660786381726;0	155162535684248
18;1;18;483;"GAATCCATGCTGAAAGAATGCCTGGTTGGCAGAATGGCCATTAAACCTGCTGTTCTGAAA";"A_33_P3316686";"CYB5R4";"NM_016230";"ref|Homo sapiens cytochrome b5 reductase 4 (CYB5R4)	mRNA [NM_016230]";8	18007152345764;0	00459700657958528;0	0660865505481087;0	948778723958285;0	967724226211652;0	355260174636748
19;1;19;2240;"TAGTGTCGATGTGAAATGCCCCGTGATCAATAATAAACCAGTGGATGTGAATTAGTTTTA";"A_33_P3300975";"HOXC4";"NM_014620";"ref|Homo sapiens homeobox C4 (HOXC4)	transcript variant 1	mRNA [NM_014620]";6	53252098639704;0	900673450497636;9	81992534448924;4	7341629317155e-06;4	50859316787822e-05;1	6.55145e+08
20;1;20;2664;"TGCTGCCTGATGTCTCAATGGCTTCTGAATGACTGTTCTAATAAATGATCTTAAAACAGT";"A_33_P3263061";"AK3";"NM_016282";"ref|Homo sapiens adenylate kinase 3 (AK3)	nuclear gene encoding mitochondrial protein	transcript variant 1	mRNA [NM_016282]";10	4427586640341;0	177007208050753;2	72759235482602;0	0236819236009662;0	0568168419801008;0	20857968269717
22;1;22;4460;"ACCCATGGAACAATATGCTTAGGATTACAGGAAGCAGTCCTTACTTACACTTCTTGTCTG";"A_24_P278460";"FAR1";"NM_032228";"ref|Homo sapiens fatty acyl CoA reductase 1 (FAR1)	mRNA [NM_032228]";9	12056899022055;-0	891993162424615;-12	9176099451502;4	84374175968129e-07;7	50103993390491e-06;2	7.53699e+06
24;1;24;986;"CTCCACCCCTTTTGTTGTCTGGTATGTTTAAAACAAGAAAGAACTTTAGAAAAGTAGGAT";"A_21_P0014651";"LOC100129203";"XR_110904";"ref|PREDICTED: Homo sapiens hypothetical LOC100129203 (LOC100129203)	miscRNA [XR_110904]";7	05339838753864;0	69009207145197;8	39742453181487;1	67186365370626e-05;0	000126381424421582;4	6.39575e+08
25;1;25;5397;"TTTGAGAAGCTGTTAATCTTTTAGCTGAATAATGAAGTTAGACTGAATTACGTGTCTCCC";"A_24_P286898";"MAPK8";"ENST00000374189";"ens|mitogen-activated protein kinase 8 [Source:HGNC Symbol;Acc:6881] [ENST00000374189]";8	33718117340537;-0	086651658256562;-1	14575533639204;0	28195265872085;0	413604255715775;0	151837802688172
26;1;26;1050;"GTCTGGGGGACGTTTAGAGGCGTGGCACTAGGAGTGCACATCTGTGAGCATGACAAGCTT";"A_23_P340890";"THAP3";"NM_001195753";"ref|Homo sapiens THAP domain containing	apoptosis associated protein 3 (THAP3)	transcript variant 3	mRNA [NM_001195753]";9	97252178456466;-0	407567591196457;-6	42041433741629;0	000132148396841052;0	000686585234813123;0	252051549207961
28;1;28;498;"CATCTGATTAGCAGAATCAGATGTTCCAGCTTGGACTCATGAAGGATTAAAAATCTGCAT";"A_21_P0010885";"TMEM14B";"NM_030969";"ref|Homo sapiens transmembrane protein 14B (TMEM14B)	transcript variant 1	mRNA [NM_030969]";13	1808484098501;-0	509762424973641;-8	11683810991588;2	18823403745642e-05;0	000157992755946483;5	8.00055e+08
30;1;30;5914;"AGGTGACTTAAGTCACTGGGATTCACTAATTTTCTCTGAGAGCACAGCTGATTGAGAATT";"A_23_P89762";"PHLPP1";"NM_194449";"ref|Homo sapiens PH domain and leucine rich repeat protein phosphatase 1 (PHLPP1)	mRNA [NM_194449]";6	94631766311002;-0	199451014688611;-2	40858401568381;0	0397978219966879;0	0879054095582001;0	322708580660569
32;1;32;1903;"CCTGGTGCCTTCTGATGGGGCTGGAATAGTTGAGGTGGATGGTTCTACCCTTTCTGCCTT";"A_23_P109034";"SDC4";"NM_002999";"ref|Homo sapiens syndecan 4 (SDC4)	mRNA [NM_002999]";12	4167003321197;-1	20069199472439;-22	2367149141349;4	55185504890191e-09;2	4826897537909e-07;9	114175
33;1;33;360;"CCAGAGAAACCCAGCAACGCTACTTTCTAAGGGCATTTTTCCCTCTCATTTGGAATCCTG";"A_21_P0013603";"XLOC_l2_015038";"ENST00000443993";"tc|ALU1_HUMAN (P39188) Alu subfamily J sequence contamination warning entry	partial (7%) [THC2677468]";5	84186104056133;-0	0339852738586348;-0	242602420517851;0	813846036856628;0	876022393164513;0	321595615725818
34;1;34;68;"AAGTGTGCCATGTGTGATGGGGACAGCTTCCCCTTTGCCTATACAGGTGGAGAAGCCGAG";"A_33_P3261031";"THC2750096";"THC2750096";"tc|Q2RH40_MOOTA (Q2RH40) Inner-membrane translocator	partial (5%) [THC2750096]";7	0458701231619;0	141217698108591;0	821086001511688;0	433172313371292;0	566843943633446;0	208093455710343
35;1;35;400;"AGGGACCATCTATGGGAACTGCTGTGTTCCAGCTACAGTACCTGCTGGATCTCCTGGGGT";"A_33_P3364776";"ENST00000396843";"ENST00000396843";"ens|Interleukin-likeUncharacterized protein [Source:UniProtKB/TrEMBL;Acc:Q1AN28] [ENST00000396843]";5	80473004481757;0	200489429294975;0	685753726603046;0	510443059935234;0	63576215968433;0	233393946084277
36;1;36;2213;"CGTGACAAATCCTTAAAGGATACACACATGACAGGAAGGATTAGAAGAGGAAACAGAAAC";"A_33_P3732466";"DKFZp547G183";"AL359570";"gb|Homo sapiens mRNA; cDNA DKFZp547G183 (from clone DKFZp547G183). [AL359570]";9	7547870327972;-0	344887962349402;-4	59391915111715;0	00136255282073808;0	00494384369955479;0	181492901439101
37;1;37;0;"GTCCCGCAGGGCCTGGCTGGCTTAGCAATCTGAGCCACCTTCCTTAAAGGAAATACTAAA";"A_33_P3402773";"A_33_P3402773";"A_33_P3402773";"Unknown";9	13272074973765;0	0228847604678766;0	217510055183559;0	832746166959841;0	888919107803376;0	326330114429832
38;1;38;2620;"TATATTCACTCACACCATCCCCTCTGTTGGTTCTGAAATAAACTATTCAAAGGAGTGCAG";"A_33_P3636315";"LOC286087";"AK091675";"gb|Homo sapiens cDNA FLJ34356 fis	clone FEBRA2012195. [AK091675]";6	85014759381519;0	175736198531045;1	20544061232558;0	259294739544768;0	388585885463169;0	142653336345046
40;1;40;2979;"TGGATATGGGTCTCATGGATACAACACTGGAAGAAAATATCCACCCCCTTACAAGCATTT";"A_23_P103837";"UBAP2L";"NM_001127320";"ref|Homo sapiens ubiquitin associated protein 2-like (UBAP2L)	transcript variant 2	mRNA [NM_001127320]";9	8093249673444;-0	253282591469912;-2	86743027269515;0	0188812685063311;0	0468284563031781;0	171911430070965
41;1;41;2842;"TGGTGAAATGCGGCTCACCTCCCAGATTTGTTGTAAAGATTAAATGAACTGGTCAGCACA";"A_33_P3402035";"TRAF4";"NM_004295";"ref|Homo sapiens TNF receptor-associated factor 4 (TRAF4)	mRNA [NM_004295]";9	77745934238505;0	826066981636668;12	2109783867325;7	77720642738764e-07;1	08765972548168e-05;3	9.92896e+07
42;1;42;51;"TAAAATTACTTAGTGCCTCATCACTAAACACCCCCAGCTCCACACCATGGGTGTTGGATA";"A_21_P0013668";"FAM75C2";"NM_001166137";"ref|Homo sapiens family with sequence similarity 75	member C2 (FAM75C2)	mRNA [NM_001166137]";6	49999138165232;0	0565885983338115;0	542166966357877;0	601095103565528;0	712589443092234;0	261597925462995
44;1;44;1779;"TTCTCTGATAACCTACTTGCTTACTCAATGCCTTTAAGCCAAGTCACCCTGTTGCCTATG";"A_23_P11543";"FUCA1";"NM_000147";"ref|Homo sapiens fucosidase	alpha-L- 1	tissue (FUCA1)	mRNA [NM_000147]";11	5114138934225;0	342544871938836;5	50196262085209;0	000403324616584947;0	00175938540893366;0	64588603932957
46;1;46;765;"ATTTCCTGCCAGCTGCTACTGGTTTTTTAGTCAGCTCTGACAGCTACGGTAATTGGGAAA";"A_21_P0002012";"XLOC_001975";"ENST00000418358";"linc|BROAD Institute lincRNA (XLOC_001975)	lincRNA [TCONS_00003197]";6	59941305318212;0	699182987869914;7	24456541297926;5	3057951613242e-05;0	000323780179328758;0	118862584956196
47;1;47;910;"CCTCAATAATCAGAAAAACTGTTGGATTTCATCTCTGCAGGGCTTTACATTTACCTTTTT";"A_33_P3219429";"SMNDC1";"NM_005871";"ref|Homo sapiens survival motor neuron domain containing 1 (SMNDC1)	mRNA [NM_005871]";10	3415986370683;0	210076182822926;3	18072846152636;0	0114206649124299;0	0305043988115864;0	111984362439873
48;1;48;853;"CAATGCCTGGTGACTGGGGCTGGTTCATACTAGACGATCAATAAATGCTCCTTGAATGAA";"A_21_P0014120";"LOC100507291";"XR_108496";"ref|PREDICTED: Homo sapiens hypothetical LOC100507291	transcript variant 2 (LOC100507291)	miscRNA [XR_108496]";8	17977835708388;0	34824113048197;2	63809669130669;0	0273891378525337;0	0642453864053164;0	235850530303519
49;1;49;194;"GTGTGCTGTCACTTATCTAAGGAAAGGTGGGGGGATTTGCTCATTTTATTTTTATTTTTA";"A_33_P3372397";"ENST00000397190";"ENST00000397190";"ens|Uncharacterized protein [Source:UniProtKB/TrEMBL;Acc:E7ETL1] [ENST00000397190]";6	41345628631596;0	115025758616978;0	980424635001048;0	35293399706978;0	488155077181531;0	179206072631064
53;1;53;1593;"TGGAGTTCTGTTCCATTCTGGGGGGAAGTTTATTTTGAGTTGTGCTGATGACAAGACCCT";"A_23_P118888";"PAFAH1B1";"NM_000430";"ref|Homo sapiens platelet-activating factor acetylhydrolase 1b	regulatory subunit 1 (45kDa) (PAFAH1B1)	mRNA [NM_000430]";11	4655432357497;0	676498715657592;11	6415681992444;1	16003635547938e-06;1	48076040933465e-05;5	4.36003e+07
55;1;55;104;"TCCTGTGCCTGTGCCGGCTCCTGCAAATGCAAAGAGTGCAAATGCACCTCCTGCAAGAAG";"A_33_P3350056";"MT1X";"NM_005952";"ref|Homo sapiens metallothionein 1X (MT1X)	mRNA [NM_005952]";15	7763467465559;0	992427670681092;21	4115316017338;6	32446086363387e-09;3	15048220730244e-07;1	1.5657e+06
56;1;56;1261;"GCATGAGGCCAATCCATGAATCCAACTTCCAATGGAGAAATGTTAATATTTTTTCAGTTT";"A_32_P202703";"LOC389831";"NM_001242480";"ref|Homo sapiens uncharacterized LOC389831 (LOC389831)	mRNA [NM_001242480]";10	5700791900044;0	89146751932719;16	4879935029303;6	05490614916887e-08;1	56297275871776e-06;5	7.37812e+06
57;1;57;1083;"TCTGGACGGTGCTGTTGGACCCCGGCGCCGTCTCCGCGTGGCTCTGGAGCCTCACCTCGG";"A_24_P787889";"TMEM191B";"NM_001242313";"ref|Homo sapiens transmembrane protein 191B (TMEM191B)	mRNA [NM_001242313]";8	60530043841081;0	0520863846069233;0	833861087398965;0	426307151726523;0	560467546781039;0	205752623686114
60;1;60;0;"AAACTGTGACTGGTATTTATTGCACCCAGAGAACCCGGCAGGGCGGTGTGGCTCCATAGG";"A_33_P3227225";"A_33_P3227225";"A_33_P3227225";"Unknown";6	54810556004522;0	264405731755865;2	18060941267283;0	0576370148936815;0	119233206291808;0	4377157101414
61;1;61;2900;"TATGGCCTTGTATGAGGGGAGTTTGAATGTTAATAAACATGTTTTCCACTTTAAGATCCA";"A_21_P0014626";"RNF13";"NM_007282";"ref|Homo sapiens ring finger protein 13 (RNF13)	transcript variant 1	mRNA [NM_007282]";11	2691666329965;-0	188245160453119;-3	13471848073785;0	0122894751908477;0	0324097882372933;0	118979216570761
62;1;62;1999;"TGTAAATTGGAGTCAACCAGGTGAAAAGAAGTTAACTGGGGGATCTAACTGGCAACCAAA";"A_23_P203658";"PICALM";"NM_007166";"ref|Homo sapiens phosphatidylinositol binding clathrin assembly protein (PICALM)	transcript variant 1	mRNA [NM_007166]";9	31070236494043;0	0535584947967251;0	827196848862206;0	429879071241846;0	563649945247217;0	206920910481293
63;1;63;1188;"CAGAAGCACAGTTTCTTCCTTCTAAAATGAAATAATTAACCTCTCCCTGTCTACATTCTT";"A_33_P3354678";"TRIM78P";"NR_002777";"ref|Homo sapiens tripartite motif containing 78	pseudogene (TRIM78P)	non-coding RNA [NR_002777]";7	13122689889406;0	00840286197564133;0	0314294943611863;0	975624876112364;0	984805787744538;0	361530967873988
64;1;64;4744;"GTATCATCCAAATAATGGGGCCTATGACTTGAATGAATAGAAATGAATAAGCTGGTGTTT";"A_23_P102060";"SSFA2";"NM_006751";"ref|Homo sapiens sperm specific antigen 2 (SSFA2)	transcript variant 2	mRNA [NM_006751]";11	4830794225184;-0	0114928809741404;-0	216188482232938;0	833744888887285;0	889615389250069;0	326585725544702
65;1;65;2997;"TGGGGTGTCGTTTTTGTGCTGTGACTTCCTAATTATTGCTAAAGAACTACTGTTTAGTTG";"A_23_P206140";"DNAJA4";"NM_018602";"ref|Homo sapiens DnaJ (Hsp40) homolog	subfamily A	member 4 (DNAJA4)	transcript variant 1	mRNA [NM_018602]";6	98250549441364;0	62280391732023;1	08818681360756;0	305277013272727;0	438719823468933;0	161057951098651
66;1;66;3981;"CAAGGCAGCTCCCTGCATCTATTGGCTCCCACTGACTGACAGCCAGATCGTTCAGAAAGA";"A_23_P14389";"ACIN1";"NM_014977";"ref|Homo sapiens apoptotic chromatin condensation inducer 1 (ACIN1)	transcript variant 1	mRNA [NM_014977]";9	48014271531951;0	289612973223566;3	56082086245476;0	00628509409459761;0	0182490596376569;0	669939218036323
67;1;67;3276;"CTGTTTGGTGTGTCCCATTGGTGTTGTCATTGTAAACAAACTCTTGAAGAGTCGATTATT";"A_23_P106016";"PRKD1";"NM_002742";"ref|Homo sapiens protein kinase D1 (PRKD1)	mRNA [NM_002742]";6	32362462508671;-0	0567040152453879;-1	01167673832862;0	338569238623187;0	473189653855039;0	173712132559629
68;1;68;5267;"TTCTTCTTCATTCTTGATGGGGAGAAGTACATACAAAGTTTGTTCTGACAGGGCGCGGTG";"A_33_P3323435";"MAP3K9";"NM_033141";"ref|Homo sapiens mitogen-activated protein kinase kinase kinase 9 (MAP3K9)	mRNA [NM_033141]";9	62036425423337;-0	0669273615032182;-0	997945145512927;0	344825738619836;0	479869065420616;0	176164203981409
69;1;69;595;"TTTGTTACAAGCTTCCTGACAATGTCACCTTTGAGGAAGGCGCCCTGATTGATCCACTTT";"A_21_P0011375";"SORD";"NM_003104";"ref|Homo sapiens sorbitol dehydrogenase (SORD)	transcript variant 1	mRNA [NM_003104]";6	44287727953858;-0	136644493218453;-0	754715832812197;0	470038692576018;0	600274643196768;0	220366162999679
72;1;72;3624;"CTATGTTATACACTTTGGCTCTTGGTTTTCTCTCTAAGGAATAACTCATGAAGAACATTC";"A_21_P0014742";"LOC100287813";"XR_132472";"ref|PREDICTED: Homo sapiens hypothetical LOC100287813 (LOC100287813)	miscRNA [XR_132472]";6	34264266697409;0	05914240531499;0	674404536193482;0	517293041925306;0	641851506962255;0	235629399655433
73;1;73;2243;"ATGCTCTGTCTCTTGGTCACTGAAGCATCCAAATAAAGAATTTCCCTCATGGGCCAGACT";"A_33_P3241482";"ZNF346";"NM_012279";"ref|Homo sapiens zinc finger protein 346 (ZNF346)	mRNA [NM_012279]";11	3703006671563;0	198925676517437;3	32312110299986;0	00911418998063166;0	0251366672588898;0	922789422678556
74;1;74;158;"AATGGAATTTAAAAGAGGAAGGAACTCAGCTTGCATATGCCTTTCACCCTTCAGTGTTCA";"A_21_P0001555";"XLOC_000934";"TCONS_00001604";"linc|BROAD Institute lincRNA (XLOC_000934)	lincRNA [TCONS_00001604]";5	8644659802959;-0	141415417688469;-0	471620240372795;0	648615842842402;0	750106297084327;0	275370696403357
77;1;77;2313;"ACTTTATGCCTAAGACCGTTGGAATTGATCCAAGTCCATTTACTGTGCGTAAACCAGATG";"A_23_P145541";"FIG4";"NM_014845";"ref|Homo sapiens FIG4 homolog	SAC1 lipid phosphatase domain containing (S. cerevisiae) (FIG4)	mRNA [NM_014845]";9	07210325924339;1	10564251572794;3	97146976259537;0	0033626261491075;0	0107382464501617;0	394210582503545
78;1;78;1176;"TCAGACCTTCTTAAACATCAGAGAATGCACACAGAAGAGGCGCCATATCAGTGCAAAGAT";"A_23_P111865";"ZSCAN21";"NM_145914";"ref|Homo sapiens zinc finger and SCAN domain containing 21 (ZSCAN21)	mRNA [NM_145914]";6	90587488007399;0	175218883054586;1	68408428400412;0	127047930006114;0	224612811097503;0	824573616478806
80;1;80;1913;"GAGAGGAGAGAAATACACGTCTGATAAGACTTCATGAAATAATAATTATAGCAAAGAACA";"A_23_P144096";"CISH";"NM_145071";"ref|Homo sapiens cytokine inducible SH2-containing protein (CISH)	transcript variant 2	mRNA [NM_145071]";6	70103806906577;-0	119918522597846;-1	18870386292963;0	26549436820621;0	395446458494665;0	145171913753012
81;1;81;506;"CGGCGAGAACACCCAGCCCAAACAGATCTGCACCTTCTGCCTCAGCAACCAGAGAAAGTT";"A_33_P3299510";"SCXA";"NM_001008271";"ref|Homo sapiens scleraxis homolog A (mouse) (SCXA)	mRNA [NM_001008271]";7	61811483872328;0	100820349769831;1	29276782965545;0	228841676674292;0	354198096405769;0	130029272985872
82;1;82;2347;"TACATCACATTTGAGGTGCTTGAATGTTCTTGGGATGAGCTTTGGAACAAAGTCCAGCAG";"A_23_P76705";"TUBGCP3";"NM_006322";"ref|Homo sapiens tubulin	gamma complex associated protein 3 (TUBGCP3)	mRNA [NM_006322]";7	92038402822326;-0	100786513852186;-1	14891347932621;0	280715242742428;0	41216482691296;0	151309375566049
83;1;83;1691;"ATGTCTATCCACAGGCTAACCCCACTCTATGAATCAATAGAAGAAGCTATGACCTTTTGC";"A_23_P63896";"FAS";"NM_000043";"ref|Homo sapiens Fas (TNF receptor superfamily	member 6) (FAS)	transcript variant 1	mRNA [NM_000043]";8	14436359137117;-0	449399297233788;-6	89589711242744;7	73150677654875e-05;0	000441525977052953;0	162088115049614
84;1;84;506;"TAGGAAGTTTTGAAGGTAGAGAATCTGGGCCCCTCAACTTCCTCTGGACATGAATCAAAC";"A_21_P0005541";"XLOC_006644";"TCONS_00014004";"linc|BROAD Institute lincRNA (XLOC_006644)	lincRNA [TCONS_00014004]";6	23072828308155;-0	0944075975237375;-0	70402239832487;0	499534729086707;0	626486908375627;0	229988918793983
85;1;85;3670;"TGCGTCTGTTTTGTGTCTGGTGCAGAATATGACAATCTACCAACTGTCCCTTTGTTTGAA";"A_24_P355944";"EFNB2";"NM_004093";"ref|Homo sapiens ephrin-B2 (EFNB2)	mRNA [NM_004093]";10	3643692425234;0	86430243776233;16	5596469111535;5	83346770281056e-08;1	5138789570681e-06;5	5.57584e+06
86;1;86;2258;"AGTCACCCCTTTTTAAGCACCCTGATTCTACCAAATGCAAACACATCTGGGTCTGCGATT";"A_23_P101374";"CYP2S1";"NM_030622";"ref|Homo sapiens cytochrome P450	family 2	subfamily S	polypeptide 1 (CYP2S1)	mRNA [NM_030622]";6	98836919452793;-1	02701542115803;-17	7698350767987;3	17837294661993e-08;9	85356853778703e-07;3	6.17333e+06
87;1;87;1956;"TTGGTCAAAAAATGCTTAGAACTCTTTACAGAACTGGCGGAAGATAAAGAGAACTGCAAG";"A_32_P199252";"HSP90AA1";"NM_001017963";"ref|Homo sapiens heat shock protein 90kDa alpha (cytosolic)	class A member 1 (HSP90AA1)	transcript variant 1	mRNA [NM_001017963]";13	0384220679539;-0	0889943992420079;-1	04768065447673;0	322572978676385;0	456522053558188;0	167593308175729
89;1;89;167;"GATGTGCTCAAAGACAGCGGCAGAGACTATGTGTCCCAGTTTGAAGGCTCCGCCTTGGGA";"A_23_P203191";"APOA1";"NM_000039";"ref|Homo sapiens apolipoprotein A-I (APOA1)	mRNA [NM_000039]";5	72269006747894;0	0585749157760036;0	481515070439201;0	641841070347079;0	745314231732177;0	273611486570882
90;1;90;10428;"TCAAAATTCGTTATCAAAGGCAAAACCTACTGTGCCAAGCTGGGGCGCTATATGTGAACG";"A_19_P00811812";"MPRIP";"NM_201274";"ref|Homo sapiens myosin phosphatase Rho interacting protein (MPRIP)	transcript variant 2	mRNA [NM_201274]";8	59345439505897;-0	010920727070749;-0	138447603847548;0	892987782052931;0	930822325293578;0	341713158441954
91;1;91;4189;"CATTAAGGCAAAGTAGTTCCAGTGATTTAAAATACGGTTCCAAATACGCTAAAACCAACT";"A_24_P54390";"RASGRP3";"NM_170672";"ref|Homo sapiens RAS guanyl releasing protein 3 (calcium and DAG-regulated) (RASGRP3)	transcript variant 2	mRNA [NM_170672]";6	22658509252509;-0	001540568892894;-0	0172000397936687;0	986658808085844;0	991774862379036;0	364089377185905
92;1;92;2526;"GGAGCTCCAACAGGCAGAGCTCCCTAACCGTTCCCCAGGCTTTGGAATCAAGAAGGAGAA";"A_33_P3311205";"PRPF40B";"NM_001031698";"ref|Homo sapiens PRP40 pre-mRNA processing factor 40 homolog B (S. cerevisiae) (PRPF40B)	transcript variant 1	mRNA [NM_001031698]";6	93450161876015;0	063281896997645;0	819172114888679;0	434207264671567;0	567607335464558;0	208373703644508
93;1;93;2589;"ATTAATGTTCTTTCCAACCCCTGCCATGTGCATGTTCATATGTCCTAAGTCTTCCTTGAT";"A_32_P89827";"TPTE2P6";"NR_002815";"ref|Homo sapiens transmembrane phosphoinositide 3-phosphatase and tensin homolog 2 pseudogene 6 (TPTE2P6)	non-coding RNA [NR_002815]";7	31215067403322;-0	206601806710875;-2	32884516224756;0	0453118350681201;0	0978482655007451;0	359209689580457
95;1;95;199;"TGGTACCAGCAGAAGCCAGGCCAGGCCCCTGTGCTGGTGATATATAAAGACAGTGAGAGG";"A_33_P3424489";"ENST00000390305";"ENST00000390305";"ens|immunoglobulin lambda variable 3-25 [Source:HGNC Symbol;Acc:5908] [ENST00000390305]";6	03040504806868;0	059514041998483;0	50111800592521;0	628522967087743;0	734978345175463;0	269817090643089
97;1;97;1427;"TCCGTTGCCTTGGTCTGGGGGCAGAAATAAAATCCCCGCAGCCTACTGCACTTCTTGGCT";"A_33_P3245927";"OGFOD2";"NM_024623";"ref|Homo sapiens 2-oxoglutarate and iron-dependent oxygenase domain containing 2 (OGFOD2)	mRNA [NM_024623]";11	7678046590385;0	395570667701069;1	07861475432619;0	309297766389408;0	442994575503434;0	162627250608957
98;1;98;680;"TGTCTTTGTCTTCGTGGTCATCGTGGTCTCGGCTTGTACATACAGACAAAACCGAAAACT";"A_23_P101521";"IZUMO2";"NM_152358";"ref|Homo sapiens IZUMO family member 2 (IZUMO2)	mRNA [NM_152358]";6	18713675538147;-0	05805269687656;-0	611207580598744;0	556443882812838;0	675558897944508;0	248003682826769
100;1;100;1625;"ATATACATACGCACATACACACGTATATATACAGGCACACACATACCCACATGCCGTGTG";"A_33_P3379526";"AK127601";"AK127601";"gb|Homo sapiens cDNA FLJ45698 fis	clone FEBRA2017811. [AK127601]";6	15833734917721;0	129134834280643;0	973890482927303;0	355994002078725;0	491057781597727;0	180271681251667
101;1;101;431;"TTTGCCATCAACAACACCAAGTCTTTTGAGGACATCCACCAGTACAGGGAGCAGATCAAA";"A_23_P98183";"HRAS";"NM_005343";"ref|Homo sapiens v-Ha-ras Harvey rat sarcoma viral oncogene homolog (HRAS)	transcript variant 1	mRNA [NM_005343]";11	7547791490792;0	0846071141334654;1	19301187061497;0	263887216423239;0	393784074637827;0	144561637846615
102;1;102;2222;"ATTTATTGAATGAAGACATGAATTTAACCCTGCAGGCCTAGGTGGGAGCTTCCAGTGCCT";"A_21_P0012132";"XLOC_l2_008731";"TCONS_l2_00016423";"linc|BROAD Institute lincRNA (XLOC_l2_008731)	lincRNA [TCONS_l2_00016423]";6	74916860881449;-0	313698244612005;-1	2269193253016;0	251511946475829;0	380126546946842;0	13954783790115
103;1;103;248;"AATGCTTCTGCCAGGCCGTCATCTGACCCATAAGGTCCCTCTGTGCACTGCTTGGAAGGT";"A_21_P0007347";"XLOC_009428";"THC2677865";"linc|BROAD Institute lincRNA (XLOC_009428)	lincRNA [TCONS_00019627]";6	61738878996298;0	00623414840380931;0	0385950943428458;0	970070385068842;0	981168751304857;0	360195779433186
104;1;104;1236;"AACGTAATCCCATTCACTCGTTCATCTTGTAGTCATTCAGCAAACATTTGGAAGCACGTA";"A_33_P3265679";"LOC389199";"XR_112616";"ref|PREDICTED: Homo sapiens hypothetical LOC389199 (LOC389199)	miscRNA [XR_112616]";5	84305972938249;-0	176713775415005;-2	64444550099634;0	0271077820461186;0	063710811148415;0	233888056966804
106;1;106;1305;"CCTATAAAGACAGATTTTGCCCCATCTACTATAATAAACCTTTCTCAGAAGTCTACTAGA";"A_21_P0000880";"SPAG5-AS1";"NR_040012";"ref|Homo sapiens SPAG5 antisense RNA 1 (non-protein coding) (SPAG5-AS1)	non-coding RNA [NR_040012]";6	40705943667541;0	419500504804462;3	62231755939702;0	00571516502687746;0	0168373167229622;0	618112879412978
107;1;107;4251;"GCAATATCTGTTACTAGAGAACATTCCCATGTGTTTAAACTCTTCACTTCTTAGATGCAT";"A_33_P3278313";"MSRB3";"NM_001193460";"ref|Homo sapiens methionine sulfoxide reductase B3 (MSRB3)	nuclear gene encoding mitochondrial protein	transcript variant 3	mRNA [NM_001193460]";11	0387264929519;0	0890198481908513;0	983914062079897;0	351307902274999;0	486428651745169;0	178572286490956
108;1;108;2286;"TGATTCCCTGAAGCCACAAACCTGTATTTTCCGGTTTTCAAATAAATATACAGTGTCAAA";"A_33_P3306973";"THC2494281";"THC2494281";"tc|MPP8_HUMAN (Q99549) M-phase phosphoprotein 8	partial (48%) [THC2494281]";8	33744467256535;-0	258984115391151;-1	21910512655517;0	254320992263348;0	383273991056739;0	1407032926411
109;1;109;4364;"CCACCACTGTCCAAGAGTAAGGAGAGAGAAATGGACAAGAAAGATTTGGACAAGTCAAGG";"A_33_P3235690";"THOC2";"NM_001081550";"ref|Homo sapiens THO complex 2 (THOC2)	mRNA [NM_001081550]";9	80818574903692;0	00581506252698283;0	0691811480265202;0	946384373850725;0	966323427799096;0	354745929074638
111;1;111;26;"CTGCCCACTCTTCATGGCGGTAGCAGCCCCCTGCCTGCTGCCACACTTTTAAGTTGAGAA";"A_21_P0004992";"XLOC_005586";"TCONS_00012054";"linc|BROAD Institute lincRNA (XLOC_005586)	lincRNA [TCONS_00012054]";10	33682440636;0	394364909033012;3	97347246443498;0	00335257045531415;0	0107142312656374;0	393328963709994
115;1;115;1745;"TGGATGAGACACAGGTCCCAAAAAAGAAATTATTTCAAGTGGAAAGTCAATTTGATGATC";"A_24_P187056";"ENST00000369381";"ENST00000369381";"gb|Homo sapiens mRNA for FLJ00310 protein. [AK090412]";5	89347975000413;-0	130772988487005;-1	81771878561967;0	103060491914485;0	190285537311844;0	698555139834519
116;1;116;4235;"GGCCTGTGAGCCAAATCTACCCCACTGCCTGTTTTTGTAAATAAAGCTTTATCAGAACAT";"A_33_P3858476";"FLJ30838";"NR_033873";"ref|Homo sapiens uncharacterized LOC400955 (FLJ30838)	non-coding RNA [NR_033873]";7	12572136939926;0	0542076273057601;0	381785595300087;0	711631834815423;0	800486313071879;0	293865648573775
117;1;117;1356;"ACTATGACATCCTGTGTGCCATTGAGACGTCTGCCAAGGACTCGAGCAACGTGGAGGAGG";"A_33_P3260373";"ISY1-RAB43";"NM_001204890";"ref|Homo sapiens ISY1-RAB43 readthrough (ISY1-RAB43)	mRNA [NM_001204890]";6	83569228384688;-0	284726990399701;-2	5428697521325;0	0319806393183282;0	0731648637326746;0	268594725262763
118;1;118;1336;"TTTTCCTCAGTCCCTTTCCCTACAGGGAGAGACACAGGTCACATTAAGAATTCATACTGG";"A_33_P3282898";"TLN1";"ENST00000378192";"ens|talin 1 [Source:HGNC Symbol;Acc:11845] [ENST00000378192]";7	5762451292669;0	00330343040001058;0	0396928936225655;0	969219557376253;0	980678070568728;0	360015646168681
119;1;119;3472;"AAACTAGCAGATGTTCCTGGAGAAATTTTGAAGAAAGCAGCTCACAAGTCAAAAGAGCTG";"A_23_P122001";"MSH3";"NM_002439";"ref|Homo sapiens mutS homolog 3 (E. coli) (MSH3)	mRNA [NM_002439]";10	0587412620945;0	0852708070054149;1	3914804311652;0	198083577449719;0	317468408967453;0	116545477891922
122;1;122;4244;"CTTTTGACACCTGCTTGACCAGGATTTGGATAAAAGGAGAATTTCTGCAGGAAAATAACT";"A_24_P303420";"LOC221442";"NR_026938";"ref|Homo sapiens adenylate cyclase 10 (soluble) pseudogene (LOC221442)	non-coding RNA [NR_026938]";7	53601286750138;1	7302828259326;21	6486694974029;5	74696619686037e-09;2	93050985651234e-07;1	75816.2
123;1;123;4569;"AGGGACTGAGGGCAGAGTCTCTGGGTTTCAGGACAGCATTATGTTATTTCCATTCACTAT";"A_23_P122508";"DPCR1";"NM_080870";"ref|Homo sapiens diffuse panbronchiolitis critical region 1 (DPCR1)	mRNA [NM_080870]";5	87124096830585;0	0530208619036712;0	722101479717695;0	488884191125342;0	617194714414025;0	226577671705047
125;1;125;2239;"TAAAGGAAGATGAGCTAGGAATCAAGAAATACGCAGAACTGATTCCTGTCACTGGCGCCA";"A_19_P00322002";"FLJ43663";"NR_015431";"ref|Homo sapiens uncharacterized LOC378805 (FLJ43663)	transcript variant 1	non-coding RNA [NR_015431]";6	85896605332794;0	257893695597316;3	70365068524946;0	00504367486130228;0	0151249144568733;0	555249068461316
126;1;126;3473;"TAGGTAGCTGCCCTCCTTGGGCAGCTTTTGACTCCTATGCCAAATTTTAAAATAAAGGCC";"A_19_P00320028";"LOC100216546";"NR_039981";"ref|Homo sapiens uncharacterized LOC100216546 (LOC100216546)	non-coding RNA [NR_039981]";8	13312253492258;0	00118546214849857;0	00844288630258815;0	993451011737905;0	995771797468487;0	365556687623559
127;1;127;2863;"CCAGGGCTCTTCAGAAAGCATCTGCATGTGAACACCATCATGCCTTTATAAAGGATCCTT";"A_23_P114883";"FMOD";"NM_002023";"ref|Homo sapiens fibromodulin (FMOD)	mRNA [NM_002023]";5	7497621257441;-0	427469467851376;-2	27627496849841;0	0493535874712542;0	105018742632081;0	38553314918712
128;1;128;1430;"AGTGGGATCCTGTTCAATAATATGGACGACTTCAGCTCTCCCAGCATCACCAATGAGTTT";"A_24_P42066";"GGT3P";"NR_003267";"ref|Homo sapiens gamma-glutamyltransferase 3 pseudogene (GGT3P)	non-coding RNA [NR_003267]";7	25298073451482;0	194522578829409;1	57683450683094;0	149882853444714;0	255725052958534;0	93878942484148
132;1;132;1989;"TTTTGATCATGTGATTGTGAATGACAGCTTGCACGATGCATGTGCCCAGTTGTTGTCTGC";"A_33_P3404480";"MPP4";"NM_033066";"ref|Homo sapiens membrane protein	palmitoylated 4 (MAGUK p55 subfamily member 4) (MPP4)	mRNA [NM_033066]";6	88192039336389;3	06088187568578;25	668874156216;1	30185513830687e-09;1	00224158733768e-07;3	679318
133;1;133;620;"TTCCATCCCCAGCCTGACAGCATGAACAGTGAAGTCCAAGATAGAGCCAGCTGTCGCTGG";"A_33_P3357431";"ENST00000317652";"ENST00000317652";"ens|Novel protein (FLJ40547)Uncharacterized protein [Source:UniProtKB/TrEMBL;Acc:Q5VZ43] [ENST00000317652]";6	68631026682035;-0	175907508479543;-0	883425113560261;0	400383724817906;0	534908799960153;0	196369780296288
135;1;135;1262;"AAGCAGCAACAGTTGAACAACCTTGTCTATGTGGTAACAAATCAGGCCAAACCTGGTGAC";"A_23_P110288";"GSTCD";"NM_024751";"ref|Homo sapiens glutathione S-transferase	C-terminal domain containing (GSTCD)	transcript variant 2	mRNA [NM_024751]";7	44273788376221;-0	00605605490588523;-0	0816564390602407;0	936738041075583;0	959519418686514;0	352248116784634
136;1;136;864;"GGGCTGTGGCATATGAAGACATATAAATGAGCCTCAGAAGGAATGCACTTGGGCTAAATA";"A_23_P114282";"MCTS1";"NM_014060";"ref|Homo sapiens malignant T cell amplified sequence 1 (MCTS1)	transcript variant 1	mRNA [NM_014060]";14	4391480585939;0	2895168735254;5	46950032736894;0	000420415448974681;0	00182061218517094;0	668362933706444
137;1;137;659;"TGCTCTCCCCTTCCCTTTAGCTGACAATGTGACAGTGCTTGAATAAAAGTCAGTCTGACA";"A_21_P0001847";"XLOC_001398";"AK130860";"Unknown";10	2750725463884;0	0278242520598582;0	207092362709587;0	840627365611113;0	894443101141949;0	328358021539109
138;1;138;2469;"CCTTGTACTTGCCTACTGTAATATGGATTTCACTTCTGAACAGTTTACAGCACAATATTT";"A_33_P3325018";"ERLEC1";"NM_015701";"ref|Homo sapiens endoplasmic reticulum lectin 1 (ERLEC1)	transcript variant 1	mRNA [NM_015701]";11	8816612299037;0	401491636536583;4	70871059271535;0	00116054795051602;0	00432000382274211;0	158591184443813
139;1;139;1320;"CAAACCCAGCATAAAGATGGATAAGGAAAAAATCAATTATTTTGTGAGTCCCCCTTTTCA";"A_21_P0004300";"XLOC_004562";"TCONS_00010097";"linc|BROAD Institute lincRNA (XLOC_004562)	lincRNA [TCONS_00010097]";5	99681725621387;-0	475369247588054;-1	44885548772483;0	181889549929329;0	297162294599473;0	109090922615567
140;1;140;1310;"TTCTGGGTCAGGAGTTAGAAGCTACTGGGAAAATCTACCTCCGACAAGAGGAGATCATTT";"A_23_P88740";"CENPN";"NM_018455";"ref|Homo sapiens centromere protein N (CENPN)	transcript variant 3	mRNA [NM_018455]";13	2441068070608;-0	126999975686848;-1	98153724099737;0	0794272887814717;0	154822833181159;0	568368397358537
143;1;143;3235;"GCCGCTGTGTCTCCTTTGTATCCTAAATCTTTATTTTTCTAGGACATGTTATGCCTCCAT";"A_33_P3412975";"SIX5";"NM_175875";"ref|Homo sapiens SIX homeobox 5 (SIX5)	mRNA [NM_175875]";11	8284009971155;-0	158567059119552;-2	21232741391254;0	0547501289546794;0	114503096754506;0	420351057126035
145;1;145;1339;"AAAGTAAGACTAAGTATTGCTGAATTTGCAGTTATGTTGTCGTGTATAAGAGCTACTTCC";"A_23_P102937";"SUMO3";"NM_006936";"ref|Homo sapiens SMT3 suppressor of mif two 3 homolog 3 (S. cerevisiae) (SUMO3)	mRNA [NM_006936]";12	4572849225701;0	103934333970557;2	07649405984284;0	0681922985978386;0	136818266031451;0	502272029234077
146;1;146;2771;"TAAAAACACAGAGTTGTAAATACACATGCTTGCAAAAACATTAGTCGTGAAATCCCTAGC";"A_24_P41021";"FBXO33";"NM_203301";"ref|Homo sapiens F-box protein 33 (FBXO33)	mRNA [NM_203301]";9	5735947446544;0	550113162843106;9	68940018727687;5	28036835872737e-06;4	93949723612413e-05;1	8.13333e+08
149;1;149;3733;"TTGGGCATGGACTAATTTGTATCTGTTTAACTCATATTCTGCACGATCTGTATATAGTAC";"A_23_P11652";"USP1";"NM_003368";"ref|Homo sapiens ubiquitin specific peptidase 1 (USP1)	transcript variant 1	mRNA [NM_003368]";12	727907123344;0	0169979062362913;0	321132367165155;0	755569061898216;0	833534878707048;0	305998071097707
150;1;150;371;"ATCTTGTCCATGGCAAATGCTGGACCCAACACAAATGGTTCCCAGTTTTTCATCTGCACT";"A_23_P258340";"PPIA";"NM_021130";"ref|Homo sapiens peptidylprolyl isomerase A (cyclophilin A) (PPIA)	mRNA [NM_021130]";16	2008493313048;0	586299640843649;10	9334327309037;1	9555621267181e-06;2	22367453137062e-05;8	1.63307e+07
151;1;151;1509;"TGATGAGATATGTGATGCTATATCATATAGCAAAGGTGCATCTGTCATCCGAATGCTGCA";"A_21_P0014949";"NPEPPS";"NM_006310";"ref|Homo sapiens aminopeptidase puromycin sensitive (NPEPPS)	mRNA [NM_006310]";10	6806641258838;0	581894742296706;12	3279632285186;7	17875068861023e-07;1	02320668519274e-05;3	7.56283e+07
152;1;152;1996;"TTTTTCATTTTCCCGATGTGTTATTTTGCTGTTGCTGCTCTGCCAAGGCTTGCTGAAGGC";"A_33_P3209386";"TXNDC17";"NM_032731";"ref|Homo sapiens thioredoxin domain containing 17 (TXNDC17)	mRNA [NM_032731]";9	26919995607274;0	166791420467206;2	16420807287611;0	0591875247360545;0	121788768208085;0	447097405340099
154;1;154;14844;"CCTCCCTACATCTTTAAATTCTTGGTTCTCTTTAGTCCTCATCCCTTGAATGGACTTGTC";"A_23_P162702";"C12orf51";"NM_001109662";"ref|Homo sapiens chromosome 12 open reading frame 51 (C12orf51)	mRNA [NM_001109662]";10	8225650085644;0	00664245817777598;0	113986021180227;0	911794577286673;0	943584482843881;0	346398260041416
155;1;155;1322;"CCCAGCCCCTGCAGAGATCCAGACGCTTGTTTTTTAAATACAGCAGCTCTGCGGTGCTTT";"A_23_P434518";"LFNG";"NM_001040168";"ref|Homo sapiens LFNG O-fucosylpeptide 3-beta-N-acetylglucosaminyltransferase (LFNG)	transcript variant 2	mRNA [NM_001040168]";8	18496782032663;-0	0538956988163442;-0	585671697369283;0	572736072813267;0	689382712666202;0	253078528220896
156;1;156;434;"GGAGCTGGTATTGGTGTTTCTAGTTGAGGGTCGTGGTATTTCCAGGGTTTCACAGAGGCC";"A_21_P0003091";"XLOC_002996";"THC2503819";"tc|BC010854 amyloid beta A4 precursor protein-binding	family B	member 1	isoform delta E9 {Homo sapiens} (exp=-1; wgp=0; cg=0)	partial (22%) [THC2503819]";8	97353224048027;-0	128119886144411;-1	98724130583696;0	078705126408548;0	153610563308289;0	563918046782644
157;1;157;588;"GAGTTGAAGACCCCACTAACCGCCAACATCACAAAATCCGGAAACACATTCCGGCCCGAG";"A_23_P61042";"ENST00000390539";"ENST00000390539";"ens|immunoglobulin heavy constant alpha 2 (A2m marker) [Source:HGNC Symbol;Acc:5479] [ENST00000390539]";6	29940335517934;-0	879381454176879;-2	25111861269636;0	0514112347100895;0	108657134701871;0	398890010233893
160;1;160;1902;"GACAAATCAACACGTAATGAGTTCCGAAGGTTCATGGAGAAGAATCCAGATGCCTACGAT";"A_23_P119907";"ANKZF1";"NM_018089";"ref|Homo sapiens ankyrin repeat and zinc finger domain containing 1 (ANKZF1)	transcript variant 1	mRNA [NM_018089]";9	35608815975632;-0	210353317547728;-2	55265286096154;0	0314752439319763;0	0722139847234419;0	265103963806879
167;2;3;336;"TCCCGCAGATCAGCAGCGTCAAGGACCGCAAGAAAGCCGTCCTGTCCGACATCGGTGTCT";"A_33_P3284404";"SYNGR1";"NM_145731";"ref|Homo sapiens synaptogyrin 1 (SYNGR1)	transcript variant 1b	mRNA [NM_145731]";7	57657739755155;2	3237932660298;15	0514444497402;1	32212903923671e-07;2	78443144519877e-06;1	2.21896e+06
169;2;5;309;"CTGTGTCTACTGGGATCTCCTGTTTTTATTGTTTTGGGATGAGATTTTAAAAACACCATT";"A_21_P0008122";"XLOC_010503";"ENST00000440860";"tc|NUDC_MYCBO (Q7TX14) NADH pyrophosphatase	partial (5%) [THC2699248]";5	82605275953685;0	296979219712144;1	99175024591975;0	0781387131215868;0	152773788702392;0	560846172744866
170;2;6;4244;"TCTAGGCTTCAGGTTGCATTGGGGTTCCTCTGTACAGCAAGATGTTTCTTGCCTTTTGTT";"A_23_P110624";"CTNND2";"NM_001332";"ref|Homo sapiens catenin (cadherin-associated protein)	delta 2 (neural plakophilin-related arm-repeat protein) (CTNND2)	mRNA [NM_001332]";6	72538923189184;0	142540281852889;1	84769347346196;0	0982926327443388;0	18308965742723;0	672138424460132
173;2;9;3539;"GTCTGTGCCATGTTGTCAATGGGTCCTTTCCAACCCAAGAGGTACATTTGTTTTTCTGTT";"A_32_P215938";"GPSM1";"NM_001145638";"ref|Homo sapiens G-protein signaling modulator 1 (GPSM1)	transcript variant 1	mRNA [NM_001145638]";11	8740177761896;0	0929717920231958;1	50978936618623;0	165966984067132;0	276668957070053;0	101567636050662
174;2;10;0;"TTCACTGAGGCCAAGTGCAATATGAATGACCTGGTGTTTGCCTACCAACAGTACCATGAT";"A_33_P3325808";"A_33_P3325808";"A_33_P3325808";"Unknown";6	82719437943481;-0	0914729524680293;-1	54050905586369;0	158416061742561;0	266790290290747;0	979410895716794
175;2;11;63;"TGTAACCATGTGACCCCCACCTTTACAAGTGTCTGTAATTCTCACTAGCAGTATATTAGA";"A_21_P0002823";"XLOC_002968";"ENST00000438488";"linc|BROAD Institute lincRNA (XLOC_002968)	lincRNA [TCONS_00005691]";6	98659221438504;0	137036251217618;1	3661517502411;0	205618756670477;0	326756127884244;0	119955082152088
176;2;12;2018;"AGCAAAAAAGTCGAACTTTTTCTGTTGAACAAAATATTCACAACAGGGCAGTTGTGATAC";"A_23_P101960";"ZFP36L2";"NM_006887";"ref|Homo sapiens zinc finger protein 36	C3H type-like 2 (ZFP36L2)	mRNA [NM_006887]";9	6951621448055;0	254517303862363;4	35266253288708;0	00192105300439977;0	00662304324850918;0	243137811099657
177;2;13;51;"AAGTAAGTCTCCATAAAACCCAGAGAAGAGACTGGAAAGCTCCTCTTTGGATCCTGTCTG";"A_19_P00318261";"SNORA26";"NR_003016";"ref|Homo sapiens small nucleolar RNA	H/ACA box 26 (SNORA26)	small nucleolar RNA [NR_003016]";9	1888242507801;-0	491296885019519;-6	22153887042372;0	000166712053287102;0	00083381937749129;0	306102513132985
179;2;15;378;"GCTTTGATGTCAGCACTGATGTGATCCGAAGAGTTTTAAAAAGCAAGTTTTTACCCACAT";"A_23_P140602";"NGRN";"NM_001033088";"ref|Homo sapiens neugrin	neurite outgrowth associated (NGRN)	transcript variant 2	mRNA [NM_001033088]";9	88752594589661;0	51718480841129;6	17978426559848;0	000175156599278676;0	000867917167333717;0	318620115199814
180;2;16;4204;"TGCACAATTTAATTATGTGGTTATTCGAGCACTTAATTTCACTCAAGGTTCATTGGGCTC";"A_24_P252575";"RABGAP1";"NM_012197";"ref|Homo sapiens RAB GTPase activating protein 1 (RABGAP1)	mRNA [NM_012197]";10	2595695267649;0	124975673376104;1	510316899345;0	165834672652343;0	276534343763727;0	101518218308067
181;2;17;1503;"TTTTAGGTTTTTAAACCTACTGTCTCTGTCATAACTTGTCAACACTGCTGTATGAAGCAC";"A_23_P104025";"TSEN15";"NM_052965";"ref|Homo sapiens tRNA splicing endonuclease 15 homolog (S. cerevisiae) (TSEN15)	transcript variant 1	mRNA [NM_052965]";10	5360761265729;-0	380362955580956;-8	00304841350924;2	44573378439166e-05;0	000172861219375629;6	3.45889e+08
182;2;18;440;"TTTCTGGACATTGAAAAAGCTCCACTGACTATGGAACAGTAATAGTTTGAATCATAGTGA";"A_23_P63459";"C1orf31";"NM_001012985";"ref|Homo sapiens chromosome 1 open reading frame 31 (C1orf31)	transcript variant 1	mRNA [NM_001012985]";12	9836597630012;-0	62209905012128;-9	32856155132139;7	18816889422107e-06;6	35656155581298e-05;2	3.3355e+08
183;2;19;593;"TTGATGACTTTCAGCATTATTGAATTATTCATTTCTCTGCCTTTCTCAATTTTGGGGTGC";"A_23_P104972";"MS4A5";"NM_023945";"ref|Homo sapiens membrane-spanning 4-domains	subfamily A	member 5 (MS4A5)	mRNA [NM_023945]";5	96790788911353;0	0876091657460769;0	805407136506781;0	441700252737321;0	574206759840308;0	210796411057145
184;2;20;2276;"GCTGCGAAACAAAGACAAGGTGAGGTGTTTTTCTTTTTTGTAATAATATAAAGCTGTGTG";"A_33_P3215028";"C6orf89";"NM_152734";"ref|Homo sapiens chromosome 6 open reading frame 89 (C6orf89)	mRNA [NM_152734]";10	8799875855925;0	0298191161070278;0	482558959486067;0	64112837009388;0	744793002044008;0	273420138514246
185;2;21;2132;"AAGCAGAATTTTGTGTGTGCGTCTGTCGGATTTCTCTGGGGAGACAGTGTGTTCATCTTT";"A_33_P3228722";"TBCD";"ENST00000397466";"ens|tubulin folding cofactor D [Source:HGNC Symbol;Acc:11581] [ENST00000397466]";7	81227264553335;-0	184840372272151;-2	88548536635352;0	018338445192343;0	0457253344405392;0	167861771553054
188;2;24;5024;"GCTAAAGTAGAGTTCGTTGTGCTGTTTCTGACTCCTAATGAGAGTTCCTTCCAGACCGTT";"A_24_P71973";"KDR";"NM_002253";"ref|Homo sapiens kinase insert domain receptor (a type III receptor tyrosine kinase) (KDR)	mRNA [NM_002253]";7	06566035186928;1	28434333471166;12	0354650567331;8	78136495519102e-07;1	1943547094592e-05;4	3.84582e+07
189;2;25;465;"TTGAAGAGGAGTTCCCCTGCTGCCTTCATAAACCCACCCATTGGGACAGTGACCCCTGCT";"A_33_P3340085";"POLDIP3";"NM_178136";"ref|Homo sapiens polymerase (DNA-directed)	delta interacting protein 3 (POLDIP3)	transcript variant 2	mRNA [NM_178136]";8	65362430217959;0	050912165666734;0	802268516315898;0	443420905761937;0	575862010065747;0	211404068143977
190;2;26;1797;"GAGGGTGGTATGATGCTGGTCAGCCATGACTTCAGACTCATTCAGCAGGTTGCACAGGAA";"A_23_P215175";"ABCF2";"NM_005692";"ref|Homo sapiens ATP-binding cassette	sub-family F (GCN20)	member 2 (ABCF2)	nuclear gene encoding mitochondrial protein	transcript variant 2	mRNA [NM_005692]";10	1341697655313;-0	72980310685808;-9	25221492955675;7	68271338673483e-06;6	70908322347698e-05;2	4.62964e+08
193;2;29;592;"TTTCCGATCAAGACTACAAGAGATCAGTCATTACAATAGCAACTTCTGTTGATAAGTTGG";"A_19_P00806765";"FONG";"NR_034096";"ref|Homo sapiens uncharacterized LOC348751 (FONG)	non-coding RNA [NR_034096]";6	56347032634595;0	124348690360379;1	35704085362641;0	208388504710716;0	33022810270305;0	121229675003082
195;2;31;1984;"CGACCTGACATTGACCTACGGGGACAGCACAGTGACTGCAAATGGCTCCTCAAGTTCGCA";"A_23_P11032";"SLC9A7";"NM_032591";"ref|Homo sapiens solute carrier family 9 (sodium/hydrogen exchanger)	member 7 (SLC9A7)	mRNA [NM_032591]";9	61156666524527;-0	384228754930374;-7	22263121983335;5	43081185466678e-05;0	000329991551138929;0	121142834818963
197;2;33;94;"GAAAAATATGGATCCCCATCCATGTACCTTTGCTCAACTGTCCTCAGACCAGATCCAGAA";"A_21_P0005037";"LOC100506867";"XR_108612";"ref|PREDICTED: Homo sapiens hypothetical LOC100506867 (LOC100506867)	miscRNA [XR_108612]";6	14233032132326;0	0459323888643874;0	269615843858939;0	793640973988375;0	861414325346553;0	316232864041456
198;2;34;1530;"ACAAATGTGACGAATGTGGAAAAAACTTTACCCAGTCCTCCAACCTTATTGTACATAAGA";"A_23_P252748";"ZNF195";"NM_007152";"ref|Homo sapiens zinc finger protein 195 (ZNF195)	transcript variant 3	mRNA [NM_007152]";10	0427348471272;-0	323182165272513;-5	40568929157169;0	000456345373814889;0	00195307808609697;0	71699234467058
201;2;37;921;"GACAAGTACTTTTTGGCTCCTTCCGTGTATGCATTAATATGTATATAAGGTGTTATGGGA";"A_21_P0002212";"LOC100506235";"XR_109987";"ref|PREDICTED: Homo sapiens hypothetical LOC100506235	transcript variant 2 (LOC100506235)	miscRNA [XR_109987]";6	86245548729393;0	392590133829072;2	49078369385814;0	0348116914243199;0	0785251808519987;0	288272926390105
202;2;38;1096;"CCTGTTCCTGCTCATCATGAAGATCCCCGCGATACTTCAACGCCTTCTGACTTCCAGGTG";"A_23_P214678";"CUTA";"NM_015921";"ref|Homo sapiens cutA divalent cation tolerance homolog (E. coli) (CUTA)	transcript variant 2	mRNA [NM_015921]";16	2123881650496;0	361354565768334;5	2020197384286;0	0005951520632561;0	00244192189156972;0	896451255585928
206;2;42;84;"ATGGGGGAGCAGAAGGAGCAGATGCGGAAGCAGGAGGAGCACATGGGGGAGCAGAAGGAG";"A_33_P3240972";"LOC100134285";"XM_003119593";"ref|PREDICTED: Homo sapiens putative golgin subfamily A member 6-like protein 6-like (LOC100134285)	mRNA [XM_003119593]";6	3024040767208;0	515546368689133;1	67253476408638;0	129345344597312;0	227699606585202;0	835905517389469
208;2;44;1565;"CCAAGGTCTCCTTCTTGGGGTCACAAACAGCAGTAAGGAAGAGGAATATATAGCAACTCA";"A_23_P106463";"OAZ2";"NM_002537";"ref|Homo sapiens ornithine decarboxylase antizyme 2 (OAZ2)	mRNA [NM_002537]";11	6774334436849;-0	100040703569968;-1	70820568179604;0	122369646553895;0	218151638474563;0	800854076839196
209;2;45;591;"TCACCACCCTGATTTGTCCTGATAAAGAGAAGGCATATGTTCGACTTGCTCCTGATTATG";"A_24_P153043";"RPL23AP7";"NR_000029";"ref|Homo sapiens ribosomal protein L23a pseudogene 7 (RPL23AP7)	transcript variant 3	non-coding RNA [NR_000029]";15	1543204096023;0	303011712999441;4	45999765592324;0	00164707084572381;0	00580861685987708;0	213239493664031
213;2;49;4023;"AGGGACCCTGAACCAAACAGAACGTGTGCTAATTTTCCGAACTCCAAACTGTACACTCAT";"A_24_P149395";"WIPI2";"NM_015610";"ref|Homo sapiens WD repeat domain	phosphoinositide interacting 2 (WIPI2)	transcript variant 1	mRNA [NM_015610]";9	11416523964883;0	136637522446755;2	16441189828331;0	0591680090013892;0	121764183005993;0	447007150875531
214;2;50;3370;"TGATGAAAGGGGCACTGATGTCACTAAAATATTCAGTGATGGCTCATCTCTGTAGGCAAG";"A_21_P0012208";"XLOC_l2_009273";"AK127572";"linc|BROAD Institute lincRNA (XLOC_l2_009273)	lincRNA [TCONS_l2_00017315]";8	01422102648489;-0	195450366604206;-2	2970434860162;0	0477160547019927;0	102210120502571;0	375222447427339
217;2;53;2319;"ATGACGGCTATGGTGTGTCGTACATCCTTGTGGGAGAGAACCTCATCAATTTCCACATTT";"A_23_P104563";"CPT1A";"NM_001031847";"ref|Homo sapiens carnitine palmitoyltransferase 1A (liver) (CPT1A)	nuclear gene encoding mitochondrial protein	transcript variant 2	mRNA [NM_001031847]";8	83939118355728;0	33708155819334;5	28973018071088;0	000530453806849352;0	00221573254210957;0	813415132676456
218;2;54;3;"ATGAGTCAGGAGAGAGGGCATGGAGCTGTTTTCCTGCTCTGCTTGTGGGGCTGGGTTTCT";"A_19_P00801041";"GNASAS";"TCONS_00075451_GNASAS";"linc|BROAD Institute lincRNA (GNASAS)	lincRNA [TCONS_00075451_GNASAS]";6	87427684852141;0	236959820076513;1	42482351492925;0	18852719688734;0	305540148863547;0	112166507465383
220;2;56;1414;"AATCCCTCTGACATCTCCACTGCCCCCAAAGACCTCCGTTGAACATTCTGTATGGAAAAG";"A_24_P336577";"C1orf183";"NM_019099";"ref|Homo sapiens chromosome 1 open reading frame 183 (C1orf183)	transcript variant 1	mRNA [NM_019099]";9	12658751738997;0	00937925140447682;0	0987114505045581;0	923568508676835;0	951149624929523;0	349175491018694
221;2;57;0;"AGGGAAGGGAGGGAGGGATCTGAGTTTTCTTGTCACAATGGGGTTTCAGTCCGAGCATGA";"A_33_P3368144";"A_33_P3368144";"A_33_P3368144";"Unknown";6	63327812103551;0	101916120805029;0	729322915392663;0	48467048090114;0	613318760338131;0	225154774474008
223;2;59;1182;"CCCTGTACACACCTAGTTCATAATCCTCATAATTTATCAACAAACACAAAGAAGTGTCTT";"A_33_P3317282";"NUS1";"NM_138459";"ref|Homo sapiens nuclear undecaprenyl pyrophosphate synthase 1 homolog (S. cerevisiae) (NUS1)	mRNA [NM_138459]";8	48226842799944;0	115976532187647;1	11664822246257;0	293562811575152;0	426513669984577;0	156576963539343
225;2;61;306;"CAGCTGCCTCGCCAGGTGTGTGGGACTGAAGTTCTTGGAGAAGGGAGTCCAACTCTTCAA";"A_33_P3500167";"ACAN";"NM_001135";"ref|Homo sapiens aggrecan (ACAN)	transcript variant 1	mRNA [NM_001135]";9	70552691292126;0	3358595402748;1	02113669673551;0	334309126514101;0	468902483371294;0	172138274126101
227;2;63;2356;"CTGAGCTGTGACATTGCTGGTCATCCTTGGTGCTCTTGCTTTTTTGAAAGATGCTTTTTT";"A_33_P3384108";"SLC19A1";"NM_194255";"ref|Homo sapiens solute carrier family 19 (folate transporter)	member 1 (SLC19A1)	transcript variant 1	mRNA [NM_194255]";7	03475407411639;-0	0279645779611979;-0	0999659686616082;0	922600716479447;0	950452702125959;0	34891964445601
229;2;65;237;"ACACTGGTGACTCCACTAGGAACTCTCAGCGTCCTAATATTACCAAATCACTCTTGGTGA";"A_21_P0013519";"XLOC_l2_014565";"TCONS_l2_00028266";"linc|BROAD Institute lincRNA (XLOC_l2_014565)	lincRNA [TCONS_l2_00028266]";6	00173437808996;0	680556428204868;1	5297617570519;0	161022352424643;0	270288420062856;0	992252841387684
230;2;66;653;"GCTGATTGGGGAAATAATTTTCAACACTATCCTGAATTATGTGCCTGTCTAGATAAGCAG";"A_23_P36531";"TSPAN8";"NM_004616";"ref|Homo sapiens tetraspanin 8 (TSPAN8)	mRNA [NM_004616]";5	92372296235429;1	42507244624449;12	2003057591279;7	83449580336896e-07;1	09472025598095e-05;4	1.88155e+06
231;2;67;632;"GATATGATTATTGTTCTTTTCATGTGTGATTACAGGTGATGGACAGATGGTTTCCTCAAT";"A_21_P0007963";"XLOC_010491";"ENST00000455487";"linc|BROAD Institute lincRNA (XLOC_010491)	lincRNA [TCONS_00021594]";5	860799422258;0	209410237044151;1	09194625487612;0	303709050962536;0	437091111805653;0	160460036554138
232;2;68;174;"AATGAAGAGAACCCAGGGAAGTTCCTTTTTGAAGTAGTTCCAGGTAAGATATTTTCCTAG";"A_33_P3236030";"ARHGAP24";"ENST00000509709";"ens|Rho GTPase activating protein 24 [Source:HGNC Symbol;Acc:25361] [ENST00000509709]";8	47943805388848;0	412892732695136;5	64550318641096;0	00033628943135265;0	0015080537766065;0	553619960653603
236;2;72;3506;"GAAGCTAAGCTCACCAAAATCCTATTGGTTAATGTTTCTAGTGAATTTCCCAGAAACATT";"A_33_P3273459";"SPATA21";"ENST00000466212";"ens|spermatogenesis associated 21 [Source:HGNC Symbol;Acc:28026] [ENST00000466212]";7	45550840908206;-0	00373423847303744;-0	0394436372660489;0	969412735022642;0	980781017166932;0	360053438780942
237;2;73;1678;"GTAGAAGCAGATGGGCAAACAGAAGAGATTTTGGATTCTCAAAACTTAAATTCAAGAAGG";"A_24_P383850";"EIF4G3";"NM_003760";"ref|Homo sapiens eukaryotic translation initiation factor 4 gamma	3 (EIF4G3)	transcript variant 3	mRNA [NM_003760]";8	18793809185148;0	586003755773336;8	08509187572354;2	25693772105772e-05;0	000162116642552762;5	9.51446e+08
238;2;74;6925;"TGCAAGTACCACAAATGCCCTTACATAATTGGCACAATGAACCAGGCTACCTCTTCGACT";"A_23_P354791";"NAV2";"NM_182964";"ref|Homo sapiens neuron navigator 2 (NAV2)	transcript variant 1	mRNA [NM_182964]";6	37008894039492;0	120551008431539;0	476696760626564;0	645135730178675;0	747884262846033;0	274554967861936
239;2;75;306;"GAACCCTCCATTCTGTGGATCAGTATCTCAACATCAAACTAACTGACATCAGTGTCACAG";"A_23_P59153";"LSM2";"NM_021177";"ref|Homo sapiens LSM2 homolog	U6 small nuclear RNA associated (S. cerevisiae) (LSM2)	mRNA [NM_021177]";12	0927266488304;0	100348428883489;1	79425346700798;0	106942735313807;0	196058635127801;0	719748695630066
240;2;76;1905;"CTCCCTGGGAAAAGTGGCGTATGGCCCTGAGCTGGGCTTTATATTTTATATCTGCAAATA";"A_23_P103110";"MAFF";"NM_012323";"ref|Homo sapiens v-maf musculoaponeurotic fibrosarcoma oncogene homolog F (avian) (MAFF)	transcript variant 1	mRNA [NM_012323]";10	5980822095159;0	546649722328555;10	0382466980516;3	95465102893755e-06;3	89772343372773e-05;1	4.30889e+08
241;2;77;3290;"ACAAAACCATTATCTTTGAGGGAGTTTTTAATACCAATGACAGAACAGAGATTTGTGTGC";"A_23_P344853";"WDR43";"NM_015131";"ref|Homo sapiens WD repeat domain 43 (WDR43)	mRNA [NM_015131]";10	6948416556895;-0	0361104434023254;-0	404149198335728;0	695701652221722;0	787928436712712;0	289255540417355
242;2;78;1504;"ACCCAACGGGGACCCCAACTTCAAGTTGTTCATCATCCGGGGTTCACCCCAGCAGATTGA";"A_24_P134235";"KHSRP";"NM_003685";"ref|Homo sapiens KH-type splicing regulatory protein (KHSRP)	mRNA [NM_003685]";7	46988190476944;0	498168497868285;5	24029377613056;0	000565926281700274;0	00233900690278896;0	858670247426071
243;2;79;3678;"AAGATCCTTAATGTACCCATGTCCTCTCAACTTGCTGCAAATCACTGGAACCAGCAACAG";"A_33_P3218772";"UPF2";"NM_080599";"ref|Homo sapiens UPF2 regulator of nonsense transcripts homolog (yeast) (UPF2)	transcript variant 1	mRNA [NM_080599]";7	30960830219778;0	134473472479568;1	4386821673821;0	184674196048666;0	300734559427461;0	110402332821353
244;2;80;3040;"AAATTGAAGTTTTAAGGGACGTCAGTGTTTATGCCATTTTTCCAGTTCCAAAATGATTCC";"A_23_P53646";"NAP1L1";"NM_139207";"ref|Homo sapiens nucleosome assembly protein 1-like 1 (NAP1L1)	transcript variant 1	mRNA [NM_139207]";14	5805978475013;-0	354082393381498;-5	79995574102769;0	000277415886808388;0	00127952461480492;0	46972487181301
245;2;81;828;"TTACAGCGTAACATGTGTACTTCAAATTGTAGTAGTGACTGGAAATTTAGGATTCTGTTG";"A_23_P431505";"XKR6";"AB073660";"gb|Homo sapiens primary neuroblastoma cDNA	clone:Nbla00437	full insert sequence. [AB073660]";5	95167864144449;-0	6685063583944;-6	00626748288283;0	000215597199718249;0	00103319700475551;0	379295814242981
250;2;86;6702;"TTGGAGTCTTCATGTCTCGTAAAGTTTCTCCACATTAGGTTTCTTCTCGGTACAACTCAA";"A_23_P319783";"SPAG17";"NM_206996";"ref|Homo sapiens sperm associated antigen 17 (SPAG17)	mRNA [NM_206996]";5	93718227109901;-0	335703056161593;-4	52043663626534;0	00151148212031602;0	00541341064349132;0	198731121790325
251;2;87;1212;"TAAGTAAAATGGGAAACTTGCCTCTGTTTTTTGCAAGGGGAGGTAAAGAGTGTTTAGTAA";"A_23_P103442";"MEAF6";"NM_022756";"ref|Homo sapiens MYST/Esa1-associated factor 6 (MEAF6)	mRNA [NM_022756]";11	7232390024676;0	0189658507935686;0	412692214407248;0	689657197788046;0	78318695079999;0	28751489874717
252;2;88;517;"TCTCTTTTTCTGTCTAAGACTCACTCCATACCAGCCTGAGCTTGGGACCATTGTTTTGCT";"A_21_P0011627";"XLOC_l2_005871";"THC2558292";"tc|AF310676 E3 ubiquitin ligase SMURF2 {Homo sapiens} (exp=-1; wgp=0; cg=0)	partial (5%) [THC2558292]";7	88155228233532;0	275736219773692;4	06494372527581;0	00292569866875058;0	00953310886597748;0	349968909408864
253;2;89;682;"ATGTGTGCTGCAAAAGATCCCTATCACGTCCTCGACTTTCCTGCAAGAGGCAGATTATTA";"A_21_P0009225";"XLOC_012116";"TCONS_00025313";"linc|BROAD Institute lincRNA (XLOC_012116)	lincRNA [TCONS_00025313]";6	16964909467626;0	124662930251205;1	31493561254284;0	221604232633267;0	346024756472344;0	127028767166688
255;2;91;393;"GCCCTCCTACACTCCACCTTGGAGAGACCCAGAAAAGAACAAGCTTCATTTGTAAAAAAG";"A_21_P0008647";"LOC145837";"NR_026979";"ref|Homo sapiens uncharacterized LOC145837 (LOC145837)	non-coding RNA [NR_026979]";8	47647211623057;0	0704622562465538;0	495757230604219;0	632151207233546;0	737666383173497;0	270803893311397
256;2;92;1489;"AAGAGTTTTCCGAGAGGTGACCGTAAAAGGAATTGATGCTTCTGATTACCAGACAGTCCA";"A_33_P3230976";"PREP";"NM_002726";"ref|Homo sapiens prolyl endopeptidase (PREP)	mRNA [NM_002726]";7	75456514803229;-0	13443436539508;-1	43917527465695;0	184538371763669;0	300537657005902;0	110330048190283
257;2;93;3947;"GAGTCAGCAACAGCAAGTTTTACTCATAGAAGCTGGGGTATGTGTGTAAGGGTATTGTGT";"A_23_P106675";"PLCG2";"NM_002661";"ref|Homo sapiens phospholipase C	gamma 2 (phosphatidylinositol-specific) (PLCG2)	mRNA [NM_002661]";6	81695179724434;-1	73756053497085;-29	0141872546947;4	45724825495546e-10;4	73380359222663e-08;1	737821
259;2;95;1662;"GTTTGCCCTATTATAATGATACCCAGCTATGTCCAGTAACATAACTAGATTGTTCTGAAT";"A_19_P00321284";"LOC100287765";"NR_038988";"ref|Homo sapiens uncharacterized LOC100287765 (LOC100287765)	non-coding RNA [NR_038988]";8	59571590225803;-0	178904219211896;-0	776223001153705;0	457872881947573;0	588785188454461;0	216148281926047
261;2;97;1998;"TTATTATTCTTCATAACAATTTTAGGAGGACCAGAGCTACTGACTATGGCTACCAAAAAG";"A_23_P72096";"IL1A";"NM_000575";"ref|Homo sapiens interleukin 1	alpha (IL1A)	mRNA [NM_000575]";10	1252868621433;-0	836777821413346;-9	60716856990808;5	66001596236789e-06;5	23689803533637e-05;1	9.22512e+08
262;2;98;3198;"ATAAATGACTAGGAATGACCTTCAGATAGCGTTTAGCAACTGTAACCAATCTGACAATAA";"A_32_P231086";"GOLGA6L9";"NM_198181";"ref|Homo sapiens golgin A6 family-like 9 (GOLGA6L9)	mRNA [NM_198181]";9	86634160066105;-0	216286310796367;-0	976454616577475;0	35479085413589;0	489756263202508;0	179793882267354
263;2;99;2327;"GGATGGGCTGGTCACCTTCTACCTCCCGCTACTGATCATGTGCATCACCTACTACCGCAT";"A_23_P7535";"HRH2";"NM_022304";"ref|Homo sapiens histamine receptor H2 (HRH2)	transcript variant 2	mRNA [NM_022304]";7	6249915259666;0	0594172635338639;0	234549724665292;0	819898273918412;0	880475420633201;0	323230361734379
264;2;100;1979;"TAGATGCCCTGTATTCTGTGTAGCAAGCATAACTAGAGAATCAATGTTAGTGCTCAAACT";"A_32_P60606";"ENST00000391437";"ENST00000391437";"gb|Homo sapiens mRNA; cDNA DKFZp667F0711 (from clone DKFZp667F0711). [AL713753]";6	00389699540698;-0	0401804922071989;-0	265229481253275;0	796911197980364;0	863745447996232;0	317088639909408
265;2;101;3226;"ATGCAAGATGGCCAGCACTGAACTTTTGAGATATGACGGTGTACTTACTGCCTTGTAGCA";"A_23_P31073";"MYB";"NM_005375";"ref|Homo sapiens v-myb myeloblastosis viral oncogene homolog (avian) (MYB)	transcript variant 2	mRNA [NM_005375]";7	84708321041324;0	600628313700782;2	84103288581112;0	0197046528355658;0	0485302103358723;0	178158720553817
266;2;102;398;"GGCAAGAGAGAAAGTGAATACGCTGATATAAGAAGCAAGAAACCTTCCTTCCTTCCAGAT";"A_32_P85591";"H2BFXP";"NR_003238";"ref|Homo sapiens H2B histone family	member X	pseudogene (H2BFXP)	non-coding RNA [NR_003238]";8	31019953737068;0	374874126257085;3	80000928511368;0	00435430562131257;0	0133512677364305;0	490136919092578
269;2;105;1549;"GAAGCAAGCACTTGAAGAGAAGGAAGGGGAGAAAGGGTCCCCCTTGCTGTCTGCCTCTGA";"A_23_P345710";"XXYLT1";"NM_152531";"ref|Homo sapiens xyloside xylosyltransferase 1 (XXYLT1)	mRNA [NM_152531]";9	02913978558716;0	169423357126215;2	95446464198719;0	0164076887767718;0	0415295263719381;0	152458586773556
270;2;106;3505;"GACAGAACAGAATCTGCATTATCATATTATGAATTCCTGTTGCATATACAGCAACAAGTG";"A_33_P3331085";"SEC24A";"NM_021982";"ref|Homo sapiens SEC24 family	member A (S. cerevisiae) (SEC24A)	transcript variant 1	mRNA [NM_021982]";9	18514256051022;1	09398073410451;12	6967475364979;5	60195106420561e-07;8	43569420899095e-06;3	9.68184e+06
271;2;107;663;"TCACTCCAGCTCCTAAAAAGCCACCATGGGAAGAGCTGCCTCCAATTAAAGTTCTTGATT";"A_21_P0000144";"LOC100505478";"NM_001199233";"ref|Homo sapiens uncharacterized protein LOC100505478 (LOC100505478)	mRNA [NM_001199233]";8	71872966730422;-2	43245511618282;-18	4765184902213;2	26980505977241e-08;7	65642838820503e-07;2	8.10743e+06
272;2;108;861;"TTGTCCCCACTGTTTAAAAATGTTACCTGTGTATTTCCATGCAGTGTATATATTGAGATG";"A_23_P110961";"BRP44L";"NM_016098";"ref|Homo sapiens brain protein 44-like (BRP44L)	mRNA [NM_016098]";11	8261558348503;0	825705077656997;16	7727349824279;5	22631025612835e-08;1	39686598041703e-06;5	1.28019e+06
274;2;110;1469;"ATATCTGGTTCACTACCACCATTTTCTGTTTCCTACTTTCTCAGTGGTTTCATTGAAAAG";"A_23_P166122";"POLR3F";"NM_006466";"ref|Homo sapiens polymerase (RNA) III (DNA directed) polypeptide F	39 kDa (POLR3F)	mRNA [NM_006466]";9	0830897204716;-0	109446519464454;-2	02968633532271;0	073525148625822;0	14538017011186;0	533703540985481
276;2;112;1713;"GCCTACAACTATGGAGGATTTCGAGATGGCTTTAAAAAAGGTTTCTAAGTCAGTGTCTGC";"A_23_P113803";"KATNA1";"NM_007044";"ref|Homo sapiens katanin p60 (ATPase containing) subunit A 1 (KATNA1)	transcript variant 1	mRNA [NM_007044]";11	0544416802427;0	168051996324193;3	25705267726096;0	0101173125820512;0	0274515277310631;0	100777001046681
277;2;113;293;"GAAAGTGGCCACAAAGAAGGACTGAGGCCCCATACCCTATCCATAAAACCTTCACAGAAA";"A_33_P3237364";"LOC729032";"XR_132715";"ref|PREDICTED: Homo sapiens 60S ribosomal protein L36-like (LOC729032)	miscRNA [XR_132715]";6	28433590443876;0	0816635501301928;0	688787770083941;0	508621305440721;0	634253077028893;0	232839948413049
278;2;114;0;"TTTTCTACAGCTTTTGATAATCAAGTTACAATCAAGGTCTATGAAGGTAAACAACCCCTG";"A_24_P401090";"A_24_P401090";"A_24_P401090";"Unknown";6	35639467855477;-0	0673310338183208;-0	580460527004084;0	576093401813806;0	692129388477442;0	254086857352213
279;2;115;5127;"TTGAAGAGGGGAAATTATACTTATTGTTGTTTACTGAATCCTGGTGTGAAAGCATATCAG";"A_23_P123727";"ZCCHC6";"NM_024617";"ref|Homo sapiens zinc finger	CCHC domain containing 6 (ZCCHC6)	transcript variant 1	mRNA [NM_024617]";8	59859450749485;0	490008649443105;7	73061947925127;3	20845456077179e-05;0	000215055337982996;7	8.94873e+08
280;2;116;4408;"GTTTAGAAAATGGGCTTTTCCAAAAGCAAACAAAGATAGGTTCCTCAGGTGACCAAAACT";"A_23_P213518";"CAST";"NM_001042440";"ref|Homo sapiens calpastatin (CAST)	transcript variant 6	mRNA [NM_001042440]";13	453263981994;-0	545405936635222;-6	63805216157645;0	000103052098222461;0	000559698990852119;0	205470479965691
281;2;117;3800;"GTGCTGTAACTGTTTTTCCTACTTCTTCAATGGAAGGATTGTCCTTAGATCTTCCCACCA";"A_23_P112113";"KIAA0196";"NM_014846";"ref|Homo sapiens KIAA0196 (KIAA0196)	mRNA [NM_014846]";10	2149065450895;-0	461462927914724;-9	56864262896261;5	8481643717833e-06;5	38312155274562e-05;1	9.76192e+08
282;2;118;401;"TGAAGTGGGCTGGATGTGTGTATTCATCTCTCATCAGTGCCAAAAGGAATTATGCACATC";"A_33_P3292402";"LRRIQ3";"ENST00000468759";"ens|leucine-rich repeats and IQ motif containing 3 [Source:HGNC Symbol;Acc:28318] [ENST00000468759]";6	06317612367271;0	0417773590721833;0	225278215437255;0	826882197315273;0	88510907035211;0	324931415778246
283;2;119;1140;"GTCACTGTTGAAGAGGATGACACCATCATGGAAGAATTGGTAGATAATCATGGCAAAAAA";"A_33_P3291776";"NANS";"NM_018946";"ref|Homo sapiens N-acetylneuraminic acid synthase (NANS)	mRNA [NM_018946]";14	9318786950497;0	123538903068118;2	17267486501815;0	0583821058429735;0	120362365688185;0	441860954762589
284;2;120;4126;"GTCAGGACCTCAAAGAGGTATAAGTTTGTGTGTATAATTCCCTGGCTTTTTTCTAAAATT";"A_33_P3337569";"C4orf40";"NM_214711";"ref|Homo sapiens chromosome 4 open reading frame 40 (C4orf40)	mRNA [NM_214711]";6	1597302602756;1	0490985264324;2	17640581296012;0	0580305906326075;0	119852667130307;0	439989806001615
285;2;121;6192;"CTCTCTGCCTGCAAACATAACAGAATTTTAGTATTGGTTTACATAGAGTTAACTATACCC";"A_33_P3222744";"ZNF117";"NM_015852";"ref|Homo sapiens zinc finger protein 117 (ZNF117)	mRNA [NM_015852]";6	76569970733325;-0	61245872138574;-7	48415445587873;4	12790954370633e-05;0	000264140244813024;9	6.96823e+08
286;2;122;3530;"GGAGGTCTTAATACAGTTCCTAGTTCCTTACTTCTGTTTTAAACTTTGGGTACCAAACCA";"A_24_P3415";"PPP2R2C";"NM_181876";"ref|Homo sapiens protein phosphatase 2	regulatory subunit B	gamma (PPP2R2C)	transcript variant 2	mRNA [NM_181876]";6	24416101884899;-0	389460781939013;-3	57366370636805;0	006161316700188;0	0179382223298697;0	658528103872077
288;2;124;2624;"AGGGTCTCCAATTTAGGCTTTCAACATTATCTCTAAAGAAGGTTATACATTATGTCGGCT";"A_23_P362228";"C1orf213";"NR_033690";"ref|Homo sapiens chromosome 1 open reading frame 213 (C1orf213)	transcript variant 1	non-coding RNA [NR_033690]";9	19183862400363;1	09121227127485;15	416202717646;1	07738852669257e-07;2	3927096472717e-06;8	7.8385e+06
289;2;125;5584;"CTGTGTGGAGAGCATGCATCAGGTGGAAGAAGACTACCTGTTTGAAAAAGCAGAAGTCAA";"A_23_P108376";"THADA";"NM_022065";"ref|Homo sapiens thyroid adenoma associated (THADA)	transcript variant 1	mRNA [NM_022065]";8	8929211079142;0	102260408793489;1	46682663237517;0	177059897525408;0	291031550230979;0	106840271804096
290;2;126;7752;"CTCAGACTGATTTCACCTAGATTGTCACGGTTTCCTTCATGTTAACTTTGCGTGACTTTG";"A_24_P782308";"NEDD4L";"NM_001144967";"ref|Homo sapiens neural precursor cell expressed	developmentally down-regulated 4-like (NEDD4L)	transcript variant j	mRNA [NM_001144967]";10	0945059758142;-0	437840444246254;-6	51986020831191;0	000117869552852797;0	000624780466282824;0	229362468717115
292;2;128;2546;"TCTTAGTTGTGTCTCTGCAATGCTGTGGGCACAAAGGAAGGGGCACCAGAGTCCCTGTGC";"A_33_P3846177";"B4GALNT1";"NM_001478";"ref|Homo sapiens beta-1	4-N-acetyl-galactosaminyl transferase 1 (B4GALNT1)	mRNA [NM_001478]";8	35621908502217;0	409840745481155;3	58342486247779;0	00606895558438827;0	0177045590341415;0	649950116363014
293;2;129;46;"ACTCAGTGCCCCTGAGCTCATTCTTTTCAGTAAATTCTCTCTCTGCGTGGTGAGAAAACA";"A_33_P3271634";"HLA-DPB1";"ENST00000466949";"ens|major histocompatibility complex	class II	DP beta 1 [Source:HGNC Symbol;Acc:4940] [ENST00000466949]";6	69215718038951;-0	0114911832166174;-0	1055559739886;0	918289996408909;0	947467763776931;0	347823847026915
294;2;130;8334;"ATAAACTTGATGAACTCCAAGTTCACAGTGTCATTTCTTCAGAACTCCCCTTCATTGAAT";"A_23_P59388";"DST";"NM_001723";"ref|Homo sapiens dystonin (DST)	transcript variant 1e	mRNA [NM_001723]";8	64813031146502;-0	382042120001577;-4	29155471896794;0	0020985004255971;0	00715205927724153;0	262558460253891
295;2;131;4768;"GCCTCTCCCAGTTTACTTTAAAAATGGCTTTAAGGATAAAGAATAAATGTGATAGCTGTG";"A_23_P109774";"ZBTB11";"NM_014415";"ref|Homo sapiens zinc finger and BTB domain containing 11 (ZBTB11)	mRNA [NM_014415]";10	4266547933189;-0	365061662820482;-6	96546461817315;7	16418355076683e-05;0	000415243924106046;0	15243973954466
297;2;133;4133;"GCATTGGAGAACTTTAACTTGAACATTCTCATCGATACTTCCTGGACATATTTTGTGTTT";"A_33_P3238290";"FAM65C";"NM_080829";"ref|Homo sapiens family with sequence similarity 65	member C (FAM65C)	mRNA [NM_080829]";6	42418753034387;-2	32329179584591;-25	7261161951029;1	27676151804896e-09;9	87648693529219e-08;3	625746
298;2;134;2873;"ACTTGGTGTGGAAAGAGTATGAATTTGCCATGTGATTTGCAAATGGGGGGAAGCTACTGT";"A_23_P99891";"MESDC1";"NM_022566";"ref|Homo sapiens mesoderm development candidate 1 (MESDC1)	mRNA [NM_022566]";11	000864850012;-0	0301025336230225;-0	552856014090719;0	594058336555238;0	706903718904986;0	259510645520024
300;2;136;2869;"TTGCCCCTACCTCTTCTGGGCGCAGGGAGTAAGTTACTGCTAAATTAAATTAAATGTGTG";"A_23_P430670";"CHST5";"NM_024533";"ref|Homo sapiens carbohydrate (N-acetylglucosamine 6-O) sulfotransferase 5 (CHST5)	mRNA [NM_024533]";6	97853783441268;-0	0492472828200192;-0	510653026780481;0	622095624662136;0	729849327413597;0	267934182582671
301;2;137;0;"CTGAACCGCAGCCGCTTCGACAGTCTCTTTGCAGAGATCCAGCGACGACTATACTTGTCC";"A_33_P3411313";"A_33_P3411313";"A_33_P3411313";"Unknown";6	23189001661885;0	109556899276908;0	754261244891478;0	470298089486496;0	6005155352621;0	220454596620416
302;2;138;88;"AGCTTTCCAGTCTCTTCTCTGGGTTTTATGGAGACTTACTTTACCCTTCTGTCGTCTTCT";"A_33_P3658861";"SNORA26";"AI792523";"gb|qi73d08.y5 NCI_CGAP_Ov26 Homo sapiens cDNA clone IMAGE:1862127 5'	mRNA sequence [AI792523]";7	13467870253782;-0	368869865179766;-4	30609380452603;0	0020547486479997;0	00702526683942098;0	257903797036553
303;2;139;2118;"ACGGTGCCACTTGCCTCAAAAGTTACTATGGTGCTTAAGATTGTCTTGATCTGACATATA";"A_23_P41948";"CCDC99";"NM_017785";"ref|Homo sapiens coiled-coil domain containing 99 (CCDC99)	mRNA [NM_017785]";11	5299027197889;-0	101999255469806;-1	82799773095788;0	101401644098993;0	187785505072141;0	689377299019771
304;2;140;763;"CCTCAGGCATCCTTCTCAAGGGGAAGCCAAGAGAGGCATCAGGATGGGTGGGTTTCTGAT";"A_23_P27724";"SEPW1";"NM_003009";"ref|Homo sapiens selenoprotein W	1 (SEPW1)	mRNA [NM_003009]";13	9880537103043;0	0357779799054114;0	709285244603027;0	496419440540128;0	623762180416131;0	22898864691434
305;2;141;790;"GCAGTGGAAACCGAGCAAATTGGTCAGGAGATGTTGGAAAACCTTAGTCATGACAGAGAA";"A_23_P10785";"VTI1A";"NM_145206";"ref|Homo sapiens vesicle transport through interaction with t-SNAREs homolog 1A (yeast) (VTI1A)	mRNA [NM_145206]";7	95535379037745;0	805499628938096;16	9415740321143;4	79490905788104e-08;1	31319296580946e-06;4	8.20848e+06
306;2;142;3999;"ATTTCTCCCTGTCTTACTCAGTTACATAGGGCCATCAGTAAATAAAGCCAAAAGTTGTGC";"A_23_P107587";"NPC1";"NM_000271";"ref|Homo sapiens Niemann-Pick disease	type C1 (NPC1)	mRNA [NM_000271]";10	8382262777497;0	195324704834402;3	30464340648518;0	00938383749361536;0	0257787169664113;0	946359638762995
308;2;144;427;"AGTGGTTCCTCCTCCCTGTTAAAGACTAATGCTCAGATGCTGTTTACGGATATTTATATT";"A_23_P160849";"FCER1G";"NM_004106";"ref|Homo sapiens Fc fragment of IgE	high affinity I	receptor for; gamma polypeptide (FCER1G)	mRNA [NM_004106]";10	2029054438035;-0	00774198982823826;-0	0717353868502589;0	944408538141665;0	965010216790994;0	35426383762809
310;2;146;1263;"ATGCTCCAGCAGAGCAAAATCTTGAAAGTCATTCGCAAAAACATTGGTAAGAAGTGCCTT";"A_24_P823684";"HSP90AB1";"NM_007355";"ref|Homo sapiens heat shock protein 90kDa alpha (cytosolic)	class B member 1 (HSP90AB1)	mRNA [NM_007355]";11	9724655298352;0	326385076815331;2	88490327302672;0	0183556939923287;0	0457572330895194;0	167978874331929
314;2;150;2792;"TTTGCTGAATTGCCACACACAGGTGGCCATTTTATGTCAGTTCCTCAGAGAAATTGACTA";"A_23_P43079";"INTS8";"NM_017864";"ref|Homo sapiens integrator complex subunit 8 (INTS8)	mRNA [NM_017864]";8	9344849634938;-0	840483494741992;-11	5519629677542;1	23732794892983e-06;1	55475257307935e-05;5	7.07635e+07
315;2;151;2629;"TGTGGGGTATGTATGACTATAAAGGGATGACGCAAGGAGTTCCTTTGTGCTGATGGAACA";"A_23_P217659";"BRCC3";"NM_001018055";"ref|Homo sapiens BRCA1/BRCA2-containing complex	subunit 3 (BRCC3)	transcript variant 2	mRNA [NM_001018055]";12	6144582677268;-0	0833392915922282;-1	41377866596169;0	191647621446758;0	309371990631068;0	11357321067549
317;2;153;3697;"TTTGTTTTTGCTCATCTCTTTCTGAGGTCATCTGCAGAGAGTGCCCCATGCCTTCTTTAA";"A_33_P3404749";"FMN1";"NM_001103184";"ref|Homo sapiens formin 1 (FMN1)	mRNA [NM_001103184]";7	77188954711611;0	836912886019995;11	6188547101832;1	17911001267439e-06;1	49738595926842e-05;5	4.97037e+07
319;2;155;2389;"ATCTTGTCCTGTGCATCCTAACAGAGGAAGGATCCATGATTCTGCTTTGGTCCAATTGCT";"A_23_P126869";"PADI3";"NM_016233";"ref|Homo sapiens peptidyl arginine deiminase	type III (PADI3)	mRNA [NM_016233]";5	85430343715743;-0	210486390794885;-1	45882523370662;0	179196212791493;0	293791223131762;0	107853372282638
320;2;156;2770;"ACTCCCTGTAAATACGCTGTTATACATACTGTTAACACCCCTTTGCTTTTTCTATGGGAC";"A_23_P137543";"ZNF362";"NM_152493";"ref|Homo sapiens zinc finger protein 362 (ZNF362)	mRNA [NM_152493]";9	97917005926995;-0	309153732502846;-4	33614470324815;0	00196737797654698;0	00675537887489565;0	2479959697018
321;2;157;1535;"TCCTGACAAGTTTTTCTCCCATGTCCGAGATGGCCTTAATTTTGGTACACAGATTGGCTT";"A_23_P374322";"LACC1";"NM_153218";"ref|Homo sapiens laccase (multicopper oxidoreductase) domain containing 1 (LACC1)	transcript variant 2	mRNA [NM_153218]";6	75648374116228;0	0176216513768424;0	0897247130159614;0	930505081501653;0	95575019223502;0	350864400214217
323;2;159;10148;"TGATTTGACCACCAAGATGTAATGATGATTCTATTCCATTTTGAAAAGGGTCTGAGAAAG";"A_23_P113161";"C1orf21";"NM_030806";"ref|Homo sapiens chromosome 1 open reading frame 21 (C1orf21)	mRNA [NM_030806]";8	24481552207178;-0	0821314740856351;-1	33467646192747;0	215322349251989;0	338664379224292;0	124326707183368
325;2;161;950;"CGAGCAGAGTTTGCCGAGAGGTCTGTGGCAAAGTTGGAGAAAACCATCGATGACCTAGAA";"A_33_P3270599";"TPM2";"NM_213674";"ref|Homo sapiens tropomyosin 2 (beta) (TPM2)	transcript variant 2	mRNA [NM_213674]";11	2334017883246;0	106631498809211;1	59959190386609;0	14474892286128;0	248865755071646;0	91360833193115
332;3;4;0;"ACTACTTATGGAGGTTTTAAAAAATCTTTTAAGTCCAGGCCTGACGTTTAGAGAAGGTTA";"A_24_P493287";"A_24_P493287";"A_24_P493287";"Unknown";6	55109449770171;-0	608498562383298;-1	90345019814829;0	0899696808255593;0	170719047642343;0	62672481515383
333;3;5;289;"TTATCATCAGCCTATCTGTAAAGACTTCCTTGCTGGTCCCTCCCATCGCAGAATAAACAG";"A_21_P0011326";"XLOC_l2_004706";"TCONS_l2_00008703";"linc|BROAD Institute lincRNA (XLOC_l2_004706)	lincRNA [TCONS_l2_00008703]";9	14479072783703;0	49241363018476;2	95233071614481;0	0164641736242481;0	0416588384359416;0	152933302867214
335;3;7;2704;"TAAGGTAGCAGGCAGTCCAGCCCTGATGTGGAGACACATGGGATTTTGGAAATCAGCTTC";"A_23_P40952";"RAF1";"NM_002880";"ref|Homo sapiens v-raf-1 murine leukemia viral oncogene homolog 1 (RAF1)	mRNA [NM_002880]";11	0559306246441;0	0726369037772052;1	06650043463161;0	314445256339699;0	448212630625954;0	164542845076761
337;3;9;174;"AAGCAGGAATCTCTCTTTCTGAAATGAGTATTACCTCCATGTTGGGGCAAGGGAAAGAGC";"A_19_P00808883";"Q7Z2X8";"THC2653958";"tc|Q7Z2X8_HUMAN (Q7Z2X8) ZNF480 protein (Fragment)	partial (28%) [THC2653958]";6	04344954396962;-0	0498692703566341;-0	490813588961816;0	635506396569283;0	74038814216826;0	271803075257667
338;3;10;1401;"TCCCAACTGTGGAATGGCAGTGTAGGTAGCTTCAGGAAATGGCTCAGGTTAATTCTCAAA";"A_23_P45166";"PROSC";"NM_007198";"ref|Homo sapiens proline synthetase co-transcribed homolog (bacterial) (PROSC)	mRNA [NM_007198]";9	96029464684421;0	152430917823143;2	41691684509745;0	0392615326876752;0	086875893686955;0	318929136286818
339;3;11;264;"AGATGTTACCTGAGAATAAAGAAACGCAGACTTTTCCCCCTCACTTCCCTGAAACTGCCT";"A_21_P0013807";"XLOC_l2_015673";"ENST00000456559";"Unknown";7	32738400992037;0	140233248061668;1	1435204302446;0	282830960645672;0	41460916151502;0	152206712549125
340;3;12;4739;"GGGGCTTCTCAGAAATTAATCTTTGTTTTTATATTGTTCTCTTTAGTTCCCAGCCTGATT";"A_33_P3224250";"CLCC1";"NM_001048210";"ref|Homo sapiens chloride channel CLIC-like 1 (CLCC1)	transcript variant 1	mRNA [NM_001048210]";6	78581269019784;-0	0912122700856628;-1	27042136143463;0	236336640520163;0	36302707318849;0	133270468926551
341;3;13;130;"GACTTCCTTCTGCTACTGAGGTGAGAAGTCTTAGGGCAGATGCGGATGTCCAGGGCTTCG";"A_21_P0008920";"XLOC_011686";"TCONS_00024362";"linc|BROAD Institute lincRNA (XLOC_011686)	lincRNA [TCONS_00024362]";5	86945044080283;0	226180545189019;2	26126603129071;0	0505712852127996;0	107177552565061;0	393458332550572
342;3;14;3357;"TGAAACCGCACTGAGAAGGTATTTGTGGCCCGTATGCTGATTGATTGATGAGACTTCTTT";"A_21_P0003212";"XLOC_003406";"AK126102";"tc|ALU7_HUMAN (P39194) Alu subfamily SQ sequence contamination warning entry	partial (23%) [THC2523097]";8	68940898801988;-0	10741735076363;-1	69513904405759;0	124883926283212;0	221541606824354;0	813298952304123
343;3;15;2205;"TGTGGTCATCTATTCTAGCAGGGAACACTAAAGGTGGAAATAAAAGATTTTCTATTATGG";"A_23_P334608";"GUSB";"NM_000181";"ref|Homo sapiens glucuronidase	beta (GUSB)	mRNA [NM_000181]";12	8796255888018;-0	183454241646203;-3	47897271763516;0	00713785586914024;0	0203759250445704;0	748018339693418
345;3;17;2946;"TCATTCCTTCCTGTATATTTGTACTCAGAGAGCCTTATTTTATTCTTCCAGCAGAATTAC";"A_24_P166094";"ARFIP1";"NM_001025595";"ref|Homo sapiens ADP-ribosylation factor interacting protein 1 (ARFIP1)	transcript variant 1	mRNA [NM_001025595]";11	8767874167096;0	242529011095396;3	16239455832234;0	0117589723510234;0	0312564875571758;0	114745347148775
350;3;22;396;"CTGAAAGGATGTCAGCCTCTGCTTGGACACCGTGGAGACAGGGCCCTCCTTGTGCTTCAG";"A_21_P0009821";"LOC100652730";"XR_132670";"ref|PREDICTED: Homo sapiens hypothetical LOC100652730 (LOC100652730)	miscRNA [XR_132670]";7	0898906816316;0	424205644804044;3	01638964374914;0	0148524876367633;0	0381203582829034;0	139943227357395
351;3;23;320;"CTAGTGCATCCCCACAGCCACTGTAGGATTTTTCCCTACACTATGATTTCAGTCCCTTGA";"A_33_P3381022";"ICMT";"ENST00000362035";"ens|isoprenylcysteine carboxyl methyltransferase [Source:HGNC Symbol;Acc:5350] [ENST00000362035]";7	20690335208714;0	0778743865788805;0	996110464392057;0	345668205918694;0	480812745470653;0	176510637325018
352;3;24;1375;"TTTATGGACAAAATGCTACTACCTTCACTTACACCCTCCCTAGAGATCTCCCAAAGAAGG";"A_21_P0004336";"XLOC_004636";"TCONS_00010174";"linc|BROAD Institute lincRNA (XLOC_004636)	lincRNA [TCONS_00010174]";6	986535753193;0	127187856608742;1	13448628480813;0	286403547203495;0	41841676801237;0	153604518775897
353;3;25;504;"AAACAACTACATTTTCAACTTGGCCTTTATGATGTCCCTGCTTCTGGATTTTGTTTAGTT";"A_21_P0006572";"XLOC_008061";"TCONS_00017462";"linc|BROAD Institute lincRNA (XLOC_008061)	lincRNA [TCONS_00017462]";7	30243456182087;0	194167360181847;1	24672352607565;0	244506674315259;0	372348274612251;0	136692364912965
356;3;28;3221;"TTGGATATTTTATTTTATTTTTGGCTGCTCGGGTAACTTTAGCCCTTAACCAAGCATATG";"A_23_P593";"GPBP1L1";"NM_021639";"ref|Homo sapiens GC-rich promoter binding protein 1-like 1 (GPBP1L1)	mRNA [NM_021639]";10	6926713927126;0	0325754837570109;0	532890145926163;0	607237917508626;0	71770360985153;0	263475381588219
357;3;29;2526;"TCATGCCAGACCAGAACTTGATGCTACTGTGTCTTGTGTTAAGAATCATTTCCTGGCCAG";"A_33_P3272189";"MFSD9";"NM_032718";"ref|Homo sapiens major facilitator superfamily domain containing 9 (MFSD9)	mRNA [NM_032718]";7	93004148736915;-0	0772045915342421;-1	19486615699349;0	263197886627932;0	393062371992151;0	14429669438339
358;3;30;2532;"ATTTACTGGCCATTTTAGTTGTATCACAGCAGAATGAATAAAAGATGGTGAAGGCTGTTA";"A_23_P112652";"CNOT10";"NM_015442";"ref|Homo sapiens CCR4-NOT transcription complex	subunit 10 (CNOT10)	mRNA [NM_015442]";10	6203260459982;0	335063715065012;7	07242967146478;6	37882621346655e-05;0	000376643353301566;0	138269126519129
359;3;31;67;"GGGTCATTGTGACAAGGGACACAGAGCTTGTGACCTCCCTACAAACAAATGCCCTACACA";"A_21_P0000477";"SNORA11B";"NR_003709";"ref|Homo sapiens small nucleolar RNA	H/ACA box 11B (retrotransposed) (SNORA11B)	small nucleolar RNA [NR_003709]";8	89311440569335;0	937708656746471;14	259806479457;2	09568922095732e-07;3	97168899472359e-06;1	4.58042e+07
361;3;33;147;"AATTTGAAACAGAAATGGCCACATAAGGACAACTCAGATGAAGTGCAGGCGGGCTGACAT";"A_21_P0001170";"XLOC_000982";"ENST00000449439";"gb|zw75a04.r1 Soares_testis_NHT Homo sapiens cDNA clone IMAGE:781998 5' similar to contains Alu repetitive element;	mRNA sequence [AA429672]";5	78566606001227;0	338304710948925;2	46468089407007;0	0363234972210492;0	0813990348588693;0	298823100176268
362;3;34;351;"TTATCCACAGAAGCAAAACACACCCACACTCCCAGGAAGGAGGCGGCAAAGGACAGCTGC";"A_33_P3388070";"DB226000";"DB226000";"gb|DB226000 TRACH3 Homo sapiens cDNA clone TRACH3018100 5'	mRNA sequence [DB226000]";6	91432844677572;-0	0304826322165788;-0	0868871749167694;0	932696607447953;0	957077622432806;0	351351711651825
363;3;35;1747;"AAGTCATAAACTCTTTGTTCTCTGCAACAGGAGGTACCACATTTATCTTGTTGACTGTGA";"A_33_P3364089";"SLCO1B3";"NM_019844";"ref|Homo sapiens solute carrier organic anion transporter family	member 1B3 (SLCO1B3)	mRNA [NM_019844]";9	06951550720025;-1	10252732429071;-6	69084593523129;9	71023626524936e-05;0	000532689060715521;0	195554894267462
364;3;36;380;"TCTCATTAATCTACAAAATTATCAGCAGTGGCAGCTAATTGTCAGTTAACTAGGTAGTTG";"A_21_P0005032";"XLOC_005763";"THC2666473";"linc|BROAD Institute lincRNA (XLOC_005763)	lincRNA [TCONS_00012210]";6	09322600815956;0	183508378900585;1	72567873726816;0	119080079647991;0	213446051527452;0	783579448434539
367;3;39;597;"TATAAGATAAAGCACTTCCCAAACCTTAGATGAAGACACCCCTGCGATCGGATGACTGCA";"A_33_P3226080";"C17orf87";"NM_207103";"ref|Homo sapiens chromosome 17 open reading frame 87 (C17orf87)	mRNA [NM_207103]";6	26907158001949;0	045137943528073;0	208864334554905;0	839285476941428;0	893420933635394;0	3279827747518
368;3;40;1777;"CTGTGGAATCTGTTTATCGGTGCCCATTATATCCTTAAGTTTGGATATTTAGCTGACCTT";"A_23_P105392";"CCT2";"NM_006431";"ref|Homo sapiens chaperonin containing TCP1	subunit 2 (beta) (CCT2)	transcript variant 1	mRNA [NM_006431]";15	1950580726727;-0	13293667189469;-2	48963770818729;0	0348767240168367;0	0786388017700256;0	288690038890622
369;3;41;1123;"CCTAACCTCATTCCCCAACCACTTCATTCTTGAAAGCTGTGGCCAGCTTGTTATTTATAA";"A_23_P126735";"IL10";"NM_000572";"ref|Homo sapiens interleukin 10 (IL10)	mRNA [NM_000572]";6	20291835744379;0	00188801921862769;0	030417001956047;0	976409839958411;0	985350873364955;0	361731073655631
370;3;42;378;"TTTACTGCCCTTGCAAACAGCCTGTGGTCAAAAGCAATAAAGTTCGGACTTGGACAGATC";"A_33_P3247589";"THC2731302";"THC2731302";"tc|Q8XVR8_RALSO (Q8XVR8) PROBABLE TRANSCRIPTION REGULATOR PROTEIN	partial (5%) [THC2731302]";6	03800696901537;0	112574268639658;0	955929868621267;0	364506357212926;0	499842952874758;0	183496795801407
371;3;43;4209;"ATTCCAAATACCAATATCAAAGAAAACTAAGTTGGTAATCTATCTCAGAAAATATATGAA";"A_24_P930926";"BAG4";"NM_004874";"ref|Homo sapiens BCL2-associated athanogene 4 (BAG4)	transcript variant 1	mRNA [NM_004874]";8	81978557848891;0	0640798987363347;0	334991538091174;0	745440051300917;0	82587140573103;0	303184741975585
373;3;45;3339;"GTCTCTACCTAATGGACCTCCGTGGCCAAAAAGTACCATTAAAACCAGAAAGGTGATTGG";"A_33_P3338166";"NUAK2";"NM_030952";"ref|Homo sapiens NUAK family	SNF1-like kinase	2 (NUAK2)	mRNA [NM_030952]";10	601603909492;-1	48753984431731;-20	4345257823561;9	4880148895422e-09;4	14531946940604e-07;1	5.21784e+06
374;3;46;1652;"CTTACCCAGGTGTTTATACTGTGTGTGTGTGAGGTCTTTAAAGTTATTGCTTTATTTGGT";"A_23_P118392";"RASD1";"NM_016084";"ref|Homo sapiens RAS	dexamethasone-induced 1 (RASD1)	transcript variant 1	mRNA [NM_016084]";10	2703491323301;3	7638801001884;50	297520664114;3	53266292191473e-12;1	84612943485177e-09;6	7773.05
375;3;47;2191;"ATACAGCATTATGAAACAGCACTCAGTAATCCTAAAATGATTTCCAAAGCTGGTTACACA";"A_23_P77401";"CPPED1";"NM_018340";"ref|Homo sapiens calcineurin-like phosphoesterase domain containing 1 (CPPED1)	transcript variant 1	mRNA [NM_018340]";10	4331139953612;-2	34237646926403;-34	6946750945936;9	28503251248166e-11;1	57617097960753e-08;5	786.264
378;3;50;1230;"TGGATCTATCTGTTGATGAGTCCGAAGCCTTTCTCTCAAATCTAGTAGTTAACAAGACCA";"A_32_P12639";"PSMD12";"NM_002816";"ref|Homo sapiens proteasome (prosome	macropain) 26S subunit	non-ATPase	12 (PSMD12)	transcript variant 1	mRNA [NM_002816]";12	2159804488862;0	037210613720335;0	651118763676497;0	531521559264699;0	654562159011825;0	24029559312726
379;3;51;2181;"AAGAGTGTTTGGTTCCTGCTGTATTATCAATGCCTGTCAGTAAAACATAATGTTTAACAC";"A_33_P3255001";"LOC152024";"NR_026834";"ref|Homo sapiens uncharacterized LOC152024 (LOC152024)	non-coding RNA [NR_026834]";6	640128196537;-0	30623664899139;-0	819062609829512;0	434266531330528;0	567661750679032;0	20839367995395
383;3;55;791;"GTTTTGCACAGTGGCAATTTTGGGACTGATTTAGAACAGAAACTCCATTGGAACCCCGAG";"A_24_P268160";"DRAM2";"NM_178454";"ref|Homo sapiens DNA-damage regulated autophagy modulator 2 (DRAM2)	mRNA [NM_178454]";10	3877143030373;-0	555161238228951;-6	91587439603137;7	56371610063141e-05;0	000433636886011614;0	159191959528073
385;3;57;0;"GCAGTATCATTTCGTCAGCAAGGCCATCCATTGAATAAATGAAAGCATTTAGCTTTTTTA";"A_33_P3230588";"A_33_P3230588";"A_33_P3230588";"Unknown";6	90710512829026;0	0937174546061073;0	628288823154942;0	54569580929845;0	666830209474812;0	244799303618207
386;3;58;7066;"GTTGCAATATTGCCTTTAAAAGCACTTTTAAGCATCAATTGTGAAATAAAAAGCCCGAGC";"A_21_P0008871";"FLJ42627";"NR_024492";"ref|Homo sapiens uncharacterized LOC645644 (FLJ42627)	non-coding RNA [NR_024492]";8	21183104949599;0	230860877691665;3	19165914495812;0	011223786086643;0	030038376269808;0	110273552220469
387;3;59;426;"TAGTAGGAGCCTTGGAGGGTGGGTAGGTGCATGGAGGGTGACAGCAGCGCTGGTTCCGTT";"A_21_P0012967";"XLOC_l2_011891";"ENST00000412295";"gb|DA853107 PLACE7 Homo sapiens cDNA clone PLACE7003223 5'	mRNA sequence [DA853107]";8	10647373851971;-0	0350700193878435;-0	210828215312074;0	837798901146155;0	892609211987925;0	327684784511992
388;3;60;261;"AACAACAACTAACATGAGGACAACTGCTGGGAAGAGGCTGAAGCAATTGCAGCATGATCA";"A_21_P0004981";"XLOC_005567";"THC2664316";"tc|ALU7_HUMAN (P39194) Alu subfamily SQ sequence contamination warning entry	partial (10%) [THC2664316]";5	92121578935615;-0	387597076391865;-1	34026409734687;0	213571868106978;0	336503266533614;0	123533343484182
389;3;61;3214;"ATGCACAACTTTTGTAAATGTGGTATACAGGACAAACTAGACGGCCGTAGAAAAGATTTA";"A_23_P12363";"ROR1";"NM_005012";"ref|Homo sapiens receptor tyrosine kinase-like orphan receptor 1 (ROR1)	transcript variant 1	mRNA [NM_005012]";10	5491808246304;-1	13932225468922;-16	5613888836011;5	82819739014312e-08;1	51373197752063e-06;5	5.57045e+06
390;3;62;885;"CTGCCCGGTGCATTTGTTCAAGGACCACGTAGACAATGACAAGGAGAAACTGAAAGAATT";"A_23_P22761";"SHOX";"NM_006883";"ref|Homo sapiens short stature homeobox (SHOX)	transcript variant 2	mRNA [NM_006883]";6	74406783416018;-0	0506105210704675;-0	246241368418896;0	811115340240118;0	873930814910336;0	320827778737015
392;3;64;495;"TTCTGGAGATGGCAGCTTATTGGACACATGGATTTTCTTCAGATTTGCACTTACTGCTAG";"A_23_P106056";"DAD1";"NM_001344";"ref|Homo sapiens defender against cell death 1 (DAD1)	mRNA [NM_001344]";14	3388927007867;0	446858517704531;8	64370602862947;1	3278304188805e-05;0	000104703707129562;3	8.43766e+08
393;3;65;0;"ACGAAAGTCATACCGTAGAAAAGATGGGTTGTTCTTATATTTGGAAGATAATGGCAGGAG";"A_33_P3519223";"A_33_P3519223";"A_33_P3519223";"Unknown";7	92452958044442;0	502976829162713;2	0517666839938;0	0709613554484341;0	141316691523647;0	518786149503691
394;3;66;2488;"GAGGAAGTGAAAAAGGAAGTCGCGTTTTTTAACAACTTCCTCACTGATGCTAAGCGCCCA";"A_23_P111487";"SRRT";"NM_001128853";"ref|Homo sapiens serrate RNA effector molecule homolog (Arabidopsis) (SRRT)	transcript variant 4	mRNA [NM_001128853]";9	23545316287387;0	113395718034543;1	54076254870362;0	158355043428378;0	26670148623673;0	979084888132358
396;3;68;3637;"AACAAAACAAAACTTTTTTGCCAAAACACCTCCTCAATAAACAACATGTAAACAGAAACA";"A_33_P3212188";"LRP3";"NM_002333";"ref|Homo sapiens low density lipoprotein receptor-related protein 3 (LRP3)	mRNA [NM_002333]";6	36903754842751;-0	911255038889618;-5	64053211191518;0	000338397090653495;0	00151560450622539;0	556391900686088
398;3;70;429;"TGAAATGGCCTCCCACCTTCAGCGTTCCCAGTACTGACCTCCTTTGTTCCTTCCACTCCA";"A_33_P3367106";"PFN1P2";"NR_003242";"ref|Homo sapiens profilin 1 pseudogene 2 (PFN1P2)	non-coding RNA [NR_003242]";13	0935560612882;0	316168865723546;5	01738016049533;0	000761024419174035;0	00301116018800202;0	110542369951463
399;3;71;628;"AGCCTCCCCGGTTTTGCCATTTGTCATTATCATTCACTCTTAAAATGTATTCTATCTATG";"A_21_P0010868";"XLOC_l2_001945";"TCONS_l2_00003528";"linc|BROAD Institute lincRNA (XLOC_l2_001945)	lincRNA [TCONS_l2_00003528]";8	11777261435792;0	0749074366321523;0	735614215314829;0	481018442166745;0	610088817157728;0	223969033591164
401;3;73;250;"TTCGCAAAGTCCAGACTCAATTGCCTTCGCAGCCCTTAAAGTTTCCTTAGGAAGGTCTGT";"A_32_P55840";"ENST00000377186";"ENST00000377186";"ens|chromosome 6 open reading frame 100 [Source:HGNC Symbol;Acc:21195] [ENST00000377186]";6	4083092465827;0	202063840511657;1	87145083605105;0	0946614330873376;0	177641994212184;0	652139568042991
402;3;74;828;"CCTTTTCTAGCAGCTGCCAGTTTGGAGCATTGCCCTCTAAGAGCTTTAAAACTATTTTTT";"A_33_P3366575";"NXT2";"NM_018698";"ref|Homo sapiens nuclear transport factor 2-like export factor 2 (NXT2)	transcript variant 1	mRNA [NM_018698]";7	10009018757285;0	32541279668356;2	08256041196752;0	0675290479074821;0	135716010595976;0	498225551447383
403;3;75;3857;"AAGTTAGGTATGTTTGCAGGAGAAAAGTATCAAGACGTTTAACTGCAGTTGACTTTCTCC";"A_23_P95930";"HMGA2";"NM_003483";"ref|Homo sapiens high mobility group AT-hook 2 (HMGA2)	transcript variant 1	mRNA [NM_003483]";10	8693375985567;1	10818164517885;18	5032488437385;2	24162596576769e-08;7	60923244497934e-07;2	7.93417e+06
404;3;76;373;"AGTTATGGGTGATCTTTACTATTCAGAATTTAGCAAAGTTCTCTGGCTATTGCATCCAAG";"A_21_P0013341";"XLOC_l2_013931";"ENST00000464543";"tc|CG028_HUMAN (O95766) Protein C7orf28	partial (20%) [THC2543586]";8	01422320120324;-0	0522547253719905;-0	909244003766546;0	387329222180678;0	522500707179803;0	191814659024484
407;3;79;0;"CGACCACATGTATATGTGTATATATATATATGTGTGTGTGTGTGTGAGTTTGTGTATGTG";"A_33_P3239102";"A_33_P3239102";"A_33_P3239102";"Unknown";11	4513561484729;0	0758767069690389;1	04491860063167;0	323779293222086;0	457806479014312;0	16806483219
409;3;81;490;"GACTGGCACTCCTAACCCTCCATCCTTAACAGGGCGTTTTGCAAAAGGAGGGGAGATTTG";"A_21_P0010355";"XLOC_014215";"ENST00000452505";"gb|DB089380 TESTI4 Homo sapiens cDNA clone TESTI4037937 5'	mRNA sequence [DB089380]";6	64500537856491;0	0515937340333359;0	391335776423172;0	704810274189411;0	795036266945291;0	29186488814403
414;3;86;2222;"TAGATGTCATAGAATTGGTCAGACAAAGCCAGTTGTTGTTTATCGCCTTGTTACAGCAAA";"A_23_P12816";"HELLS";"NM_018063";"ref|Homo sapiens helicase	lymphoid-specific (HELLS)	mRNA [NM_018063]";10	750794946884;-0	113403828004753;-2	16276824786652;0	0593255626685844;0	121963624012972;0	447739316559204
417;3;89;480;"ATCATGCCAGCTACGATCAGAGGTGCTTGAGATATATGCTGCTTCCTCTTTACGCACTAA";"A_21_P0007285";"XLOC_009303";"TCONS_00019502";"linc|BROAD Institute lincRNA (XLOC_009303)	lincRNA [TCONS_00019502]";6	0003726534052;0	283924980003975;1	26463556111958;0	238310148466421;0	365373318292888;0	134131796382196
418;3;90;4314;"ATGCAAATTATGATATGGACGTTATCATTGGTCTGGTGAGATGTTTCATATTTGTGACAG";"A_24_P388528";"ST6GAL1";"NM_173216";"ref|Homo sapiens ST6 beta-galactosamide alpha-2	6-sialyltranferase 1 (ST6GAL1)	transcript variant 1	mRNA [NM_173216]";9	0395330651357;1	99382769518713;31	3290238352377;2	27419588571341e-10;2	84238352026579e-08;1	43464.3
419;3;91;417;"CCAAAGAGGAACAGCTCTTTGGACACTAGGAAAAAACCTTGTAAAGAGAGTAAAAAATTT";"A_21_P0003137";"MTRNR2L2";"NM_001190470";"ref|Homo sapiens MT-RNR2-like 2 (MTRNR2L2)	mRNA [NM_001190470]";17	2697934334064;0	131508260290786;1	99128617072703;0	0781968300503085;0	152850269757573;0	561126941504026
422;3;94;960;"TTTCTAGGAAAGGTTGTGCCTGCTGCTGAAACTCCGGGCTCTCCAGGAGCTCATCCAGCA";"A_33_P3229012";"LOC652586";"XM_001719844";"ref|PREDICTED: Homo sapiens hypothetical protein LOC652586 (LOC652586)	mRNA [XM_001719844]";7	24681857440841;0	140349189982468;1	54747954188811;0	156745796200072;0	264558886065159;0	971219212245449
423;3;95;404;"ATCATTTTCCGAGGAAGTGACATCAAGGATATCACTGTGTGTGAACCTCCGAAAGCTCAG";"A_33_P3349774";"LSM14B";"NM_144703";"ref|Homo sapiens LSM14B	SCD6 homolog B (S. cerevisiae) (LSM14B)	mRNA [NM_144703]";6	65998552200789;-0	337381297609827;-1	98205242068096;0	0793618056401367;0	154704561757911;0	567934212439532
425;3;97;2216;"TGACTGAGACGACATGCATGTAAGATCCACAAAATGAGACAATGCATGTAAATCCATGCT";"A_23_P120103";"KCNS3";"NM_002252";"ref|Homo sapiens potassium voltage-gated channel	delayed-rectifier	subfamily S	member 3 (KCNS3)	mRNA [NM_002252]";9	20387395157306;1	72350130882959;29	7937893968913;3	53316649800423e-10;3	96157832424307e-08;1	454331
426;3;98;2317;"GTGATTAGTTCTGATGACTACTGACACCTGTCATTGGAACCAAAAGATTCCTCTTTTGCT";"A_33_P3483909";"ENST00000355500";"ENST00000355500";"ens|chromosome 11 open reading frame 55 [Source:HGNC Symbol;Acc:23262] [ENST00000355500]";5	77919239434185;-0	172903538902819;-1	64377163436455;0	135232352037513;0	236018152967526;0	866443641376274
428;3;100;1651;"GCATTAATTTTTTGACTGCAGCTCTGCTTCTCCAGCCCCGCCGTGGGTGGCAAGCTGTGT";"A_23_P158829";"ARRB2";"NM_004313";"ref|Homo sapiens arrestin	beta 2 (ARRB2)	transcript variant 1	mRNA [NM_004313]";9	82959147883337;1	13047877341929;4	20818425037805;0	00236937849346197;0	00794732123406359;0	291753234344498
429;3;101;0;"TATCACTTTTGATGAGATCGTCAACATTGCTTGACACACGTGGCACCGATCTTTAGCCAG";"A_33_P3409553";"A_33_P3409553";"A_33_P3409553";"Unknown";15	2476196841216;0	337980304142492;1	35569215426562;0	208801205206482;0	33073551799294;0	121415951671183
430;3;102;3221;"GGAGTGAGGCAAAACACAGGGTCCTGAGGTCTGGGGACCAAGCAATGTCCTCTGGTGAAA";"A_23_P398275";"LOC388152";"NR_027001";"ref|Homo sapiens uncharacterized LOC388152 (LOC388152)	non-coding RNA [NR_027001]";11	2531957497056;0	2089677218821;2	05006799664443;0	0711555026752582;0	141641969323878;0	519980273252849
431;3;103;242;"TATGATTGAACACTCACAGAAAGAACTTCAGAAGACTCCAGTGACCCTTCATGAGAAGAA";"A_21_P0010988";"XLOC_l2_002423";"TCONS_l2_00004688";"linc|BROAD Institute lincRNA (XLOC_l2_002423)	lincRNA [TCONS_l2_00004688]";5	99376658111331;0	546026428072278;1	28660008453094;0	230890217606335;0	356733589522367;0	1309600750708
432;3;104;3116;"TTCAGTGGCATCTCCCTTTACCTCTAAGACTCCTAGTATTTCCTGTGTGCCAAACCTTAT";"A_33_P3225327";"ATP13A3";"NM_024524";"ref|Homo sapiens ATPase type 13A3 (ATP13A3)	mRNA [NM_024524]";8	61703992341608;-0	0385092115483552;-0	354664218666627;0	731151183676949;0	815425189569925;0	299349843068263
435;3;107;1947;"CAGGAAAGTTATACTTGTATTTTCTTAAGTGTGGAATCAAATGAGCACATAAGCTGTGTC";"A_23_P108492";"MARS2";"NM_138395";"ref|Homo sapiens methionyl-tRNA synthetase 2	mitochondrial (MARS2)	nuclear gene encoding mitochondrial protein	mRNA [NM_138395]";6	04916059674834;0	0657308273291868;0	793864838479957;0	44805011758379;0	579628288933853;0	212786702630304
437;3;109;344;"TGTCCCCACAAAAAGTGACGCTTTACCTGCGACCAGGCTTCGGGTCCTTCGTGGACAAGA";"A_23_P430411";"ITGB2";"ENST00000545414";"ens|integrin	beta 2 (complement component 3 receptor 3 and 4 subunit) [Source:HGNC Symbol;Acc:6155] [ENST00000545414]";8	78698946430623;0	120737827698372;0	438585463763902;0	67148031555364;0	768975201920766;0	282297639271822
438;3;110;239;"TAAAGAGAAGGTGGCAGGTATCAAAGGCAGGTGGTGACTCTTCCTATTGCTTTCTGATGT";"A_21_P0003293";"XLOC_003211";"TCONS_00007229";"linc|BROAD Institute lincRNA (XLOC_003211)	lincRNA [TCONS_00007229]";6	90073255212336;0	124108028346521;0	792668373737615;0	448711816966234;0	580367615352628;0	213058115937457
439;3;111;1004;"TGGTCTCCCTTTCTTCAGTTTCCTTATTCCAGGCTTTCTTCCACATTGCTACCAGAATTA";"A_33_P3240497";"AK095730";"AK095730";"gb|Homo sapiens cDNA FLJ38411 fis	clone FEBRA2009352. [AK095730]";7	97567836571669;0	212912418783876;1	56504042804957;0	152607249212195;0	259232542211171;0	951665729998232
440;3;112;2335;"GAGCCCCCCACATGGTGCCGCGGCACGTCCCCCCTGTGACGCGTTCCAGACCAACATGCA";"A_23_P136413";"MMP17";"NM_016155";"ref|Homo sapiens matrix metallopeptidase 17 (membrane-inserted) (MMP17)	mRNA [NM_016155]";9	78248955182709;0	124468435296111;0	791702720849333;0	449246342743151;0	580778857041402;0	213209086420797
443;3;115;2200;"GAGCTTCAAGACTTTGCATTTCCTAGTATTTCTGTTTGTCAGTTCTCAATTTCCTGTGTT";"A_23_P111132";"HSPA1A";"NM_005345";"ref|Homo sapiens heat shock 70kDa protein 1A (HSPA1A)	mRNA [NM_005345]";11	0095865015592;1	2996231432242;25	1755698590144;1	54234007181624e-09;1	12037253975275e-07;4	112987
445;3;117;676;"TGGGGACCGCGGGGAGTGACCACATTCATTCATTCCCTCCCTCACTCATTCATTCATTCC";"A_33_P3227934";"LOC100130430";"AK126997";"gb|Homo sapiens cDNA FLJ45052 fis	clone BRAWH3022542. [AK126997]";8	54430060744232;0	123740069449457;0	728071145960382;0	485399226123492;0	613902967169233;0	225369242000209
446;3;118;2931;"CTTTGAAAAACTATGTATCCCCTTGCACATTTTCAAGCAGACACCTAAGATTTTTCATCA";"A_33_P3531373";"LOC340340";"BC040593";"gb|Homo sapiens hypothetical protein LOC340340	mRNA (cDNA clone IMAGE:5269834). [BC040593]";7	12399786351066;-0	900915109986372;-8	26347155740457;1	89938526056124e-05;0	000140543154023594;5	1.59464e+08
447;3;119;777;"TCCTCACTGAGAAAATCACTCCTCTGGAGATTGAGGTGCTGGAAGAAACAGTCCAAACAA";"A_23_P9362";"PSMB7";"NM_002799";"ref|Homo sapiens proteasome (prosome	macropain) subunit	beta type	7 (PSMB7)	mRNA [NM_002799]";15	4991441675688;0	0210321547022811;0	404848977604605;0	695205671863202;0	787828352565873;0	289218798636462
451;3;123;1631;"GCAGGAGGCAGGGAAATGTGAAATGGCAATGATCTCTTATTGAGTTGGGAGATTCACCTT";"A_23_P59285";"GCM2";"NM_004752";"ref|Homo sapiens glial cells missing homolog 2 (Drosophila) (GCM2)	mRNA [NM_004752]";5	75910969463977;0	101063036476162;1	29541758547248;0	22796627483462;0	353167228264632;0	129650832118187
452;3;124;282;"TTCAGCTCCAAGTCTGGCCTCTCCTCCCAGCAAGCAGCCATTACAGAAACTGAGGCTTGG";"A_21_P0009319";"XLOC_012457";"THC2665248";"tc|ALU1_HUMAN (P39188) Alu subfamily J sequence contamination warning entry	partial (14%) [THC2665248]";10	8684938300307;0	357032699631054;6	21363747791385;0	00016827534920432;0	000839550501921708;0	308206459909212
453;3;125;1888;"TTTTCCTGTACCTTTAACCTTTAGTCTGTCAAGGAAAACCCTTAGGACCTCTGAATCAAG";"A_23_P88249";"RBM23";"NM_001077351";"ref|Homo sapiens RNA binding motif protein 23 (RBM23)	transcript variant 1	mRNA [NM_001077351]";9	89563568762116;0	385581923947075;3	98888443486699;0	00327624635844024;0	0104967749715857;0	38534594965411
454;3;126;1166;"AGTGAACTTCTCCTATTACGGCCTGAGTCTGGATGTGTCGGGGCTGGGGCTGAACGTGTA";"A_23_P93217";"SLC22A7";"NM_153320";"ref|Homo sapiens solute carrier family 22 (organic anion transporter)	member 7 (SLC22A7)	transcript variant 2	mRNA [NM_153320]";7	39812547593572;-0	249743367080396;-0	776726993057981;0	457590302645876;0	588586455317943;0	216075325223225
455;3;127;382;"CCATTACAAGCTGGTGCCCCAGCAGCTGGCACACTGAGCACCTGCACTAAATTACTCAAA";"A_33_P3274851";"COX5B";"NM_001862";"ref|Homo sapiens cytochrome c oxidase subunit Vb (COX5B)	nuclear gene encoding mitochondrial protein	mRNA [NM_001862]";14	1916416862038;0	435398068967526;7	63310377319583;3	54219127849198e-05;0	00023334230366811;8	5.66204e+08
456;3;128;1157;"AAGACTCGCAATTTCACGACACACTTTGATCCCTTCTGTTGGTGTCATGTTGTAAACATT";"A_23_P103631";"EBNA1BP2";"NM_006824";"ref|Homo sapiens EBNA1 binding protein 2 (EBNA1BP2)	transcript variant 2	mRNA [NM_006824]";15	5336023798435;-0	0431477077783526;-0	762921311097927;0	465372496664723;0	596024896793801;0	218806043279219
457;3;129;576;"GAAATTGCTTTTCCTCTTGAACCACAGTTCTACCCCTGGGATGTTTTGAGGGTCTTTGCA";"A_23_P89431";"CCL2";"NM_002982";"ref|Homo sapiens chemokine (C-C motif) ligand 2 (CCL2)	mRNA [NM_002982]";7	4055400605283;-0	467508193587505;-6	09495224095;0	000193786182151071;0	000943282308519355;0	346287329158016
458;3;130;599;"CTGGATACAGAAGGAGAAACCTGTGGAAATGCAGAAAAGCTTGCAGAATATATTTGTTCC";"A_33_P3233565";"UROS";"NM_000375";"ref|Homo sapiens uroporphyrinogen III synthase (UROS)	mRNA [NM_000375]";10	1980758364989;0	438161495164607;5	71898329955436;0	000306743274807212;0	00139334164346464;0	511508115823112
462;3;134;381;"ACAAGCTTTAAGTTTCTCAGACTCTTCCTCTTCCTAACAGATTTATCAGAAGCTGAAAGC";"A_19_P00318679";"XLOC_011510";"THC2512099";"linc|BROAD Institute lincRNA (XLOC_011510)	lincRNA [TCONS_00023706]";6	47968183238769;-0	0768322485186115;-0	462616419330632;0	654810479056881;0	755261692331556;0	277263287873369
466;3;138;2336;"TGGCCACTAAAATTCATATTGAGATTATCTTGGTTTCTTGGAAGAGATAGGAATGAGTTC";"A_23_P115366";"CMPK1";"NM_016308";"ref|Homo sapiens cytidine monophosphate (UMP-CMP) kinase 1	cytosolic (CMPK1)	transcript variant 1	mRNA [NM_016308]";11	1515338365458;-0	0220352720495942;-0	420855253174649;0	683903284564903;0	778906660672397;0	285943566153609
468;3;140;828;"TCACTCAGATGTCCTGAAATTCCACCACGGGGGTCACCCTGGGGGGTTAGGGACCTATTT";"A_23_P49338";"TNFRSF12A";"NM_016639";"ref|Homo sapiens tumor necrosis factor receptor superfamily	member 12A (TNFRSF12A)	mRNA [NM_016639]";15	0940752515703;-0	614522271954435;-7	20196874388925;5	5515393378552e-05;0	000335754334041108;0	123258403701884
470;3;142;1717;"AGCAGGAACTTTTCCTGAAGTTGCAATTTATACTGTATGGCTTCTTTTTCATGTTTCATC";"A_23_P118690";"ZNF207";"NM_001032293";"ref|Homo sapiens zinc finger protein 207 (ZNF207)	transcript variant 2	mRNA [NM_001032293]";11	2539944953854;-0	130265024301275;-2	66866152029248;0	0260611819143463;0	0616426926867815;0	226295810064755
471;3;143;2500;"TGACAGTTCTTCAGGCATTTCTATTTCACAATCGAATTGAACACATTGGCCAAATAAAGT";"A_33_P3252043";"P4HB";"NM_000918";"ref|Homo sapiens prolyl 4-hydroxylase	beta polypeptide (P4HB)	mRNA [NM_000918]";16	1988863526607;0	0331404031981783;0	673213098856885;0	51801539170191;0	642519892688371;0	235874770003052
472;3;144;688;"CATAGTCTGCACCACTTCTGCCAGCTCGATTGCAGCCTGGATTTGAGTCAGAAACTTTTC";"A_33_P3240602";"IGFL2";"AK125754";"gb|Homo sapiens cDNA FLJ43766 fis	clone TESTI2049246. [AK125754]";6	31222542586335;-0	398637407419689;-1	15762680527653;0	277323698514322;0	408803386740658;0	150075360967367
473;3;145;932;"CTGAGGCCTGTTCCTCACAGGCTTCCAGGTTAGGCACTGTGAATAGGCTCAGCTCCTCTA";"A_23_P163161";"SDR39U1";"NM_020195";"ref|Homo sapiens short chain dehydrogenase/reductase family 39U	member 1 (SDR39U1)	mRNA [NM_020195]";10	2200875356282;0	485633648862111;6	47397055822766;0	000124237403007644;0	000652302109444603;0	239465908820314
474;3;146;2897;"TATTCTGCCTAACGTTTGCTTCTGTGATGGTTATATTGCCTAGCAAGCACACCCGTGGTT";"A_23_P120414";"YWHAB";"NM_003404";"ref|Homo sapiens tyrosine 3-monooxygenase/tryptophan 5-monooxygenase activation protein	beta polypeptide (YWHAB)	transcript variant 1	mRNA [NM_003404]";14	4466807410248;0	0597107395941006;1	12048324371371;0	292011816874139;0	424835673719869;0	155960956179092
476;3;148;918;"ACCCCAATGATTGCTGGCCTTGGGAAGGTGAGCCCTGGTGAGCTTGAGGAGATGAGTTGA";"A_33_P3332126";"SCLY";"ENST00000409736";"ens|selenocysteine lyase [Source:HGNC Symbol;Acc:18161] [ENST00000409736]";9	07996903583511;0	148196113121115;2	65800759067145;0	0265165068006893;0	0625449819575007;0	229608194266847
480;3;152;5248;"TAAATTTCTTTCCTGTCTGCACAATTAGCTATTCAGAGCAAGAGGGCCTGATTTTATAGA";"A_23_P104054";"C1orf9";"NM_016227";"ref|Homo sapiens chromosome 1 open reading frame 9 (C1orf9)	transcript variant 2	mRNA [NM_016227]";12	1678707800171;0	485717369981032;9	10768915643978;8	72494149888742e-06;7	46526502085076e-05;2	7.40565e+08
482;3;154;482;"AGCACGCTTCCTGGGCTGTTACAGTCAATGGACTTATCAACACTGAAATGTTATCCTCCT";"A_23_P11279";"ALG13";"NM_018466";"ref|Homo sapiens asparagine-linked glycosylation 13 homolog (S. cerevisiae) (ALG13)	transcript variant 2	mRNA [NM_018466]";10	4830040819791;0	0485329405167345;0	757557738794688;0	46841915423469;0	598829190500251;0	219835524452575
484;3;156;430;"TCTGTACTAGTTTGTGGCAGCTCAAGTAAAATCGAGTCCAAACCAACGGCTCTTTTCAGG";"A_21_P0000197";"HIST1H2AG";"NM_021064";"ref|Homo sapiens histone cluster 1	H2ag (HIST1H2AG)	mRNA [NM_021064]";11	329854958052;0	0840984440988173;0	863226940523913;0	410811111388667;0	545285495977862;0	20017915774035
487;3;159;2989;"GCAGGATCGCTACTAAAAATTGTTTTGTATCCTTGGTGGGTGTCTTCTGCTATTTTATCT";"A_23_P113393";"APLN";"NM_017413";"ref|Homo sapiens apelin (APLN)	mRNA [NM_017413]";7	61715014404042;-0	646504159661476;-9	95235680763251;4	24299951863145e-06;4	13005821263037e-05;1	5.16181e+08
489;3;161;2634;"ATACGCAAGGGGATGTGGATACTTGGCCCAAAGTAACTGGTGGTAGGAATCTTAGAAACA";"A_23_P168229";"TXNDC5";"NM_030810";"ref|Homo sapiens thioredoxin domain containing 5 (endoplasmic reticulum) (TXNDC5)	transcript variant 1	mRNA [NM_030810]";13	3338555378898;0	0571004885051689;0	818110087681138;0	434782290219259;0	568137928777815;0	208568489171235
494;4;2;1034;"AGTATATGAGAAGAATGATTAATATGAAGGTGTTTTCTAGTTTAAGTTGTTCCCCCTCCC";"A_24_P343095";"DHFR";"NM_000791";"ref|Homo sapiens dihydrofolate reductase (DHFR)	mRNA [NM_000791]";9	98220630044638;0	745943257250946;10	0431577340219;3	93883037448299e-06;3	88808470708167e-05;1	4.2735e+08
495;4;3;2310;"ATATCCATCCTGTCGTAGATCTTAATGTTTTTGATCGTTGCGTTAAAGTGGAAGTGCCAC";"A_24_P302695";"MRPL30";"NM_145212";"ref|Homo sapiens mitochondrial ribosomal protein L30 (MRPL30)	nuclear gene encoding mitochondrial protein	transcript variant 1	mRNA [NM_145212]";11	5525311011434;0	553121864379783;8	83720333364384;1	11207405405297e-05;9	05739075399831e-05;3	3.25049e+08
496;4;4;757;"GGCGGCCCCCATCCCATCTCAGGGCTAACCTTTCTCAGCTCCAGCAGAAAGCACCACCTC";"A_33_P3344991";"TBC1D3";"ENST00000519496";"ens|TBC1 domain family	member 3 [Source:HGNC Symbol;Acc:19031] [ENST00000519496]";9	36889955285092;0	169868393433463;1	70297216989985;0	123371052853389;0	219535527583613;0	805934456902467
499;4;7;735;"AGACGTCTCCAACATCTTCATTTATAACCACATCATTTTGTTCCTTGCAGACCCCAGAAG";"A_23_P31798";"NAT2";"NM_000015";"ref|Homo sapiens N-acetyltransferase 2 (arylamine N-acetyltransferase) (NAT2)	mRNA [NM_000015]";5	96425916072394;-0	0779782956461554;-0	247960017619872;0	8098265894098;0	873039184161051;0	320500453154868
500;4;8;553;"CACCACCATAATCTCCTGTGATCCCACGGAGCTGCAGTCAGAAGGGAGCAATGACAAGAA";"A_19_P00319561";"JPX";"NR_024582";"ref|Homo sapiens JPX transcript	XIST activator (non-protein coding) (JPX)	non-coding RNA [NR_024582]";5	87809776720803;-0	0298079048838842;-0	29987441927215;0	771201461631986;0	845041230701979;0	310222155303135
501;4;9;568;"TTCCCACTCCATTAAGAGGCTAGGTGAGGCGCTTCTAGGTTGCTGGGGCTCTGCTGGTTA";"A_23_P93623";"ATP6V1F";"NM_004231";"ref|Homo sapiens ATPase	H+ transporting	lysosomal 14kDa	V1 subunit F (ATP6V1F)	transcript variant 1	mRNA [NM_004231]";14	1276617725733;-0	175273913212909;-3	55814389084249;0	00631122195195099;0	0183150078829275;0	672360236803575
502;4;10;162;"TTTGTTAAAGCCACCTCTGTTGCTTCAGCCAGCTTGAGCGGTTTTCTGTTACTTGCTAGT";"A_21_P0007220";"SYT12";"ENST00000393946";"tc|SYT12_HUMAN (Q8IV01) Synaptotagmin-12 (Synaptotagmin XII) (SytXII)	complete [THC2610469]";6	32394372426174;0	00483906697452152;0	0429892081775688;0	966665066257361;0	979047676711733;0	359417114075886
507;4;15;437;"AGACGGGAGGTGTCTACTGAAAAGGGAACCTGCTTCTTTACTCCAGAACTCTGTTCTTTA";"A_23_P118435";"SUMO2";"NM_006937";"ref|Homo sapiens SMT3 suppressor of mif two 3 homolog 2 (S. cerevisiae) (SUMO2)	transcript variant 1	mRNA [NM_006937]";14	4442275234758;-0	0922752770708382;-1	89768760299081;0	0907980672215774;0	171986685690174;0	631378427226883
508;4;16;5070;"ATTGCCTCTGAAATGCCTCTTCTTTATGTACAAAGATTATTTGCACGAACTGGACTGTGT";"A_24_P117029";"LDLR";"NM_000527";"ref|Homo sapiens low density lipoprotein receptor (LDLR)	transcript variant 1	mRNA [NM_000527]";14	2314504066182;0	252117440157736;5	05301227882397;0	000725485042975391;0	00288936988650348;0	106071339609605
510;4;18;942;"AGACAGAAGGAAACACCAAGAAGAGGAGAGGCTCAAGGGCTGAGAAAGGCAGACTCAAGT";"A_21_P0014840";"LOC100507630";"XR_132706";"ref|PREDICTED: Homo sapiens hypothetical LOC100507630 (LOC100507630)	miscRNA [XR_132706]";6	34595775304407;0	31736211079368;0	624584308501962;0	548016489891994;0	668799585941552;0	245522279243441
515;4;23;2295;"TTCAGAGCTGTGATTTTTGCAAAGTATTTTACCAACCTCCTCGATGGCTTTGATAAAGGT";"A_23_P108922";"MOB1A";"ENST00000396049";"ens|MOB1	Mps One Binder kinase activator-like 1B (yeast) [Source:HGNC Symbol;Acc:16015] [ENST00000396049]";8	84425716166834;0	296824003089037;5	7497868919659;0	000295207201692584;0	00134959053139187;0	495446693266427
517;4;25;2662;"GGCTACAAAGCGTTTCTTTACTTTTCACTTCAATTAATGCTGCGCTTCGCTTGGTGAGTG";"A_23_P107073";"RPA1";"NM_002945";"ref|Homo sapiens replication protein A1	70kDa (RPA1)	mRNA [NM_002945]";13	7366728719631;0	0434544542944515;0	576704702667351;0	578519881303749;0	694241116510838;0	254862091504268
518;4;26;1161;"GAATCTTCCGTCCCTCATCCTAACTTGCAGTTCACAGAGAAAAGTGACATACCCAAAGCT";"A_23_P138680";"IL15RA";"NM_172200";"ref|Homo sapiens interleukin 15 receptor	alpha (IL15RA)	transcript variant 2	mRNA [NM_172200]";10	145322696735;-0	085199885505947;-1	0686035371804;0	313546900423628;0	447325810409554;0	164217285484042
519;4;27;390;"GATTAAAAAGATGCCCCTCAAGATGGCTGTGCCTGTCAGCTGCATGGAGCTTCGTTCAAG";"A_19_P00317872";"PVT1";"NR_003367";"ref|Homo sapiens Pvt1 oncogene (non-protein coding) (PVT1)	non-coding RNA [NR_003367]";8	3201958949928;0	0995500583813538;0	377963447315062;0	71436961903208;0	802752185649766;0	294697470559751
520;4;28;4626;"GTGGAACAAACTGCCAAAAGTTTAGACCTAACCCAATATTGCTTTCCTGAGAAATCTCTG";"A_23_P52058";"TARBP1";"NM_005646";"ref|Homo sapiens TAR (HIV-1) RNA binding protein 1 (TARBP1)	mRNA [NM_005646]";9	66265111935538;-0	141071406193578;-0	947019427358268;0	368784596246803;0	504248494039606;0	185114109165277
523;4;31;3336;"TGTGGGGAAGTAGAGTCTGTGGGAAAGGTGGTACAGGAAGACGGTCGTATGCTGCTCATA";"A_23_P115036";"IPO13";"NM_014652";"ref|Homo sapiens importin 13 (IPO13)	mRNA [NM_014652]";8	9516012875442;0	27531317885783;3	49325756503819;0	00698069946901445;0	0200034647295534;0	734344990099165
526;4;34;2101;"GTATTATCAAGGGGAGCTGCATTCTCAGTGTGTTGCTAAGGGCTTACTGTTGCTGTTGTT";"A_23_P64712";"TCTN2";"NM_024809";"ref|Homo sapiens tectonic family member 2 (TCTN2)	transcript variant 1	mRNA [NM_024809]";7	09712800636815;-0	283647632569475;-0	718237843121531;0	491148139378895;0	619084417885904;0	227271398664906
529;4;37;521;"AGCTTAAGCTGCTGCCTATGAATGATCAGATACGGGAGCTACAGACCATCATCCGTGACA";"A_33_P3418130";"UPRT";"NM_145052";"ref|Homo sapiens uracil phosphoribosyltransferase (FUR1) homolog (S. cerevisiae) (UPRT)	transcript variant 1	mRNA [NM_145052]";6	23468440309461;-0	573795404020142;-1	77016877882833;0	111068600584112;0	201999975516939;0	741559884882651
530;4;38;433;"AAAGCCAAGTGGAGAAGACTGGTGATGAATACAATGTGGAAAGCATTGATGGTCAGCCAG";"A_19_P00800006";"Q59GX9";"THC2523617";"tc|Q59GX9_HUMAN (Q59GX9) Ribosomal protein L5 variant (Fragment)	partial (51%) [THC2523617]";15	9206536898442;-0	149228427073092;-1	65440320937556;0	133028555455709;0	232819868089668;0	854702452993567
531;4;39;2086;"CCTCTCCCCAACCCATCTTTCACACAGTTCCTAGAGTGATAGTAAGTAATATTTAATGAT";"A_21_P0008531";"XLOC_010996";"TCONS_00023094";"linc|BROAD Institute lincRNA (XLOC_010996)	lincRNA [TCONS_00023094]";8	05283970577884;0	328148899282745;1	84118026433688;0	0993107381118912;0	184601406679798;0	67768819048776
532;4;40;116;"CTTTGAACTTCAGTTTAGTTGAGTCCACACAAATGTCCCTGGCTGGTGAATGGTCTTCTG";"A_21_P0001992";"XLOC_001947";"ENST00000437610";"gb|603254376F1 NIH_MGC_97 Homo sapiens cDNA clone IMAGE:5296578 5'	mRNA sequence [BI560986]";6	68267677853115;0	0486102493825671;0	363795652656864;0	724555475543841;0	810276642797715;0	297459765734371
534;4;42;837;"CCAGCAAAAAGAAGTGGAACTGACTAGTGAGATGGTGGTGAGATTTTCTTTGGTGGCTGT";"A_21_P0011031";"XLOC_l2_002729";"ENST00000513207";"linc|BROAD Institute lincRNA (XLOC_l2_002729)	lincRNA [TCONS_l2_00005385]";6	42010919795376;0	734509115773617;1	73090930862817;0	118111282502434;0	212008723824624;0	77830289053833
536;4;44;139;"CCGAACACGGCGGTACATTTCCTTGAGAGTCTTCTACATTCATGCTGTAGAAGCTATGAA";"A_32_P516818";"C3orf55";"NM_001243729";"ref|Homo sapiens chromosome 3 open reading frame 55 (C3orf55)	transcript variant 5	mRNA [NM_001243729]";6	00201687290442;-0	365002141871275;-4	15728486786371;0	00255291885755685;0	00848424339937824;0	311464124807863
537;4;45;2089;"CCCACCTCTGTTAAAAACTTGACTACTCTCCTCTTTAATAGAAAGTCACCATCATCTGTA";"A_32_P528967";"RTP1";"NM_153708";"ref|Homo sapiens receptor (chemosensory) transporter protein 1 (RTP1)	mRNA [NM_153708]";6	37106915693028;0	511110443368245;1	74683596690258;0	115205931185861;0	207786507429717;0	762802758443045
538;4;46;2318;"CTCCCTCAGCCATGAATTCACTTCTCTTCAGGAGGTTTGGCTTGGCATGAAAATACTTCA";"A_23_P94819";"RPH3AL";"NM_006987";"ref|Homo sapiens rabphilin 3A-like (without C2 domains) (RPH3AL)	transcript variant 1	mRNA [NM_006987]";9	25820855258755;2	79244366992273;10	3962320969198;2	96537709720757e-06;3	10833338723582e-05;1	1.41097e+08
539;4;47;1982;"GTTGGGGAGGGCAGTTCACCAGCATCCATAGAGTAATAAAGTCACTGTGTGTAGACCCGG";"A_33_P3360555";"ZNF444";"NM_018337";"ref|Homo sapiens zinc finger protein 444 (ZNF444)	mRNA [NM_018337]";13	4460666314157;0	232199748795196;4	34255268406984;0	00194926621317829;0	00670656069764605;0	246203810974614
540;4;48;1297;"TTGTACACGATTCTTTCCACCTGGAAACTTGAAACATGTGCCCTGGAGTTGAGGATGCTT";"A_21_P0012785";"1/2-SBSRNA4";"AK058136";"tc|GB|AK058136.1|AK058136.1 Homo sapiens cDNA FLJ25407 fis	clone TST02904 [NP1154368]";6	19971167939866;0	233685738774959;0	605046049302759;0	560350584754546;0	678714311103631;0	249162063075602
545;4;53;2553;"AGTGGGTTGGGTGTCATTATGTAGTATAAAAACTGGACTAGATAAACTGCTATTTTAGAG";"A_24_P366607";"SERTM1";"NM_203451";"ref|Homo sapiens serine-rich and transmembrane domain containing 1 (SERTM1)	mRNA [NM_203451]";6	19590401274305;0	210416812696878;1	33312062729835;0	215811915391002;0	339113636796988;0	124491633635977
546;4;54;741;"ACTGTGAACGGCTCATGGTACATTCAAGATTTGTGTGAGATGTTGGGAAAATATGGCTCC";"A_23_P500799";"CASP6";"NM_001226";"ref|Homo sapiens caspase 6	apoptosis-related cysteine peptidase (CASP6)	transcript variant alpha	mRNA [NM_001226]";10	5923109656899;-0	429526068028295;-5	88062138966743;0	000251206981699708;0	00117617352991366;0	431783768890435
547;4;55;5566;"ACAATGCCTTCCTAAACAAGATACAAACAGTTCCAGTTGTGTATGTACCAACTCTAGGAA";"A_23_P366098";"NUP210L";"NM_207308";"ref|Homo sapiens nucleoporin 210kDa-like (NUP210L)	transcript variant 1	mRNA [NM_207308]";5	79677369798714;0	0607480403665024;0	404415835661225;0	695512650428691;0	787831080131748;0	289219799950165
548;4;56;23486;"AGCCTCAGCCAGGAGAAGGTGCTGCCCTCAGACAAGTTCAAGGACTACCTAGAGACCATG";"A_33_P3404546";"OBSCN";"NM_001098623";"ref|Homo sapiens obscurin	cytoskeletal calmodulin and titin-interacting RhoGEF (OBSCN)	transcript variant 2	mRNA [NM_001098623]";7	25449728954155;0	100145594580162;0	472472229572144;0	648031143285004;0	749845171550163;0	275274834896166
550;4;58;510;"TTTCCTCTTTCTCCGTTAATAACGGCTGGGTGGCTGGGGGAGGAGGGAAGGTGGCTCCGG";"A_21_P0000536";"ZNRF2";"NM_147128";"ref|Homo sapiens zinc and ring finger 2 (ZNRF2)	mRNA [NM_147128]";7	21548353620028;0	012816102763491;0	0966349292302385;0	925170723396062;0	952038331285223;0	349501743029934
551;4;59;2074;"AAGACTGAAGATAATAAACTTTCACAGTCCAGTATCCAACAGGAACTGTGTGTGTCTTAA";"A_33_P3281139";"ZC3H13";"ENST00000378921";"ens|zinc finger CCCH-type containing 13 [Source:HGNC Symbol;Acc:20368] [ENST00000378921]";7	87766991255749;-0	257501385711155;-0	940549463336333;0	371914029240554;0	5071483309022;0	186178665081436
552;4;60;5144;"TTTACCGTGTCACATTTACTTTGGTCCTCTATGTATTTAAATGTTTGAAGTGCCTTAGAC";"A_23_P500130";"KANK1";"NM_153186";"ref|Homo sapiens KN motif and ankyrin repeat domains 1 (KANK1)	transcript variant 2	mRNA [NM_153186]";9	33755052717411;-0	449798822436836;-5	54269195113276;0	000382939575202789;0	00168438976626924;0	618354471566452
554;4;62;1761;"TTGAGGTGTTTCATAGGGGCTTTTCGTTTCCTGTCAACTATAAAAGCTTAAAGACTGCCT";"A_23_P216017";"ENTPD4";"NM_004901";"ref|Homo sapiens ectonucleoside triphosphate diphosphohydrolase 4 (ENTPD4)	transcript variant 1	mRNA [NM_004901]";7	50775333469276;0	381916919683516;4	49088692551295;0	00157621451879013;0	00560718364079886;0	205844700948392
556;4;64;969;"TGTCATTGATGCCACAATGTTCAATCCTTGTGGGTATTCGATGAATGGAATGAAATCGGA";"A_33_P3395369";"AMD1";"NM_001634";"ref|Homo sapiens adenosylmethionine decarboxylase 1 (AMD1)	transcript variant 1	mRNA [NM_001634]";10	1103720817939;-0	0534801077385545;-0	686026963463353;0	510278833763655;0	63570558246038;0	233373176081918
557;4;65;1365;"CCTGGTATTCGATGACGTGGTGGGCATTGTGGAGATAATCAACAGTAAGGATGTCAAAGT";"A_24_P62615";"CAP1";"NM_006367";"ref|Homo sapiens CAP	adenylate cyclase-associated protein 1 (yeast) (CAP1)	transcript variant 1	mRNA [NM_006367]";12	3543242052675;-0	00633565987026685;-0	078396488213061;0	939257762362574;0	961303822683914;0	352903187370415
559;4;67;3581;"AGTAGGCCAAGATTAATGTTGGTAAGGGTTTGTAATCTGTAAGAATGCTAAAAACGTAAG";"A_32_P72341";"TRIM59";"NM_173084";"ref|Homo sapiens tripartite motif containing 59 (TRIM59)	mRNA [NM_173084]";9	00978683869866;-0	132992769106959;-1	53019449548296;0	160916679139975;0	27013940809279;0	991705805185894
560;4;68;1679;"AACTGGTAAATTTTGCAACTGTATTCATACATGTCAAACACAGTATTTCACCTGACCAAC";"A_23_P309701";"PTPN2";"NM_002828";"ref|Homo sapiens protein tyrosine phosphatase	non-receptor type 2 (PTPN2)	transcript variant 1	mRNA [NM_002828]";8	96133928108937;-0	278409628683509;-3	37377337621504;0	00841567934591071;0	0234737419911074;0	861741956361325
561;4;69;967;"CCCTACGTTTACACACTTTTCTCAAACAAGATCACACCTATTCAGTCCAAAGAAGCATAT";"A_21_P0013984";"AK4";"NM_001005353";"ref|Homo sapiens adenylate kinase 4 (AK4)	nuclear gene encoding mitochondrial protein	transcript variant 5	mRNA [NM_001005353]";9	19907331998746;-0	378745880119506;-4	62454211855071;0	00130521002585662;0	00477214893237784;0	175189833755214
562;4;70;3640;"TCTCTGTGGAGCGGGGAACGGGACAGTTGTGTAAAAATCCAAAATACAATTCTGACTATG";"A_33_P3271990";"DGAT1";"NM_012079";"ref|Homo sapiens diacylglycerol O-acyltransferase 1 (DGAT1)	mRNA [NM_012079]";9	09830940834992;-0	0186305666095894;-0	302363348839948;0	769365356881466;0	843587486567231;0	309688472895277
563;4;71;1540;"ACAAATTACATGGGGAACATAAAGGAGTGAGATCCTTCTGTGATAAAATGAATTCACCAC";"A_23_P100203";"HSBP1";"NM_001537";"ref|Homo sapiens heat shock factor binding protein 1 (HSBP1)	mRNA [NM_001537]";11	5651943033527;-0	595027598431773;-12	015117048117;8	90678065250093e-07;1	20682190062097e-05;4	4.30351e+06
564;4;72;91;"AGTGAGTAAAGGGAAAATTTTCACTTCTTCCTATGGAAGCCTGTCACCCCCCAACTCCAT";"A_21_P0006739";"XLOC_008745";"ENST00000433460";"gb|DB068425 TESTI4 Homo sapiens cDNA clone TESTI4010351 5'	mRNA sequence [DB068425]";6	68667589646757;0	0928403581781607;0	598613294615125;0	564445896476476;0	682236664235765;0	250455150253705
567;4;75;975;"GTCCAGGTTGCCAGAAACTTGTTTTGCTTGCAGTTGGATGAAGTAAATGTTGGTGCACAT";"A_23_P375566";"STXBP4";"NM_178509";"ref|Homo sapiens syntaxin binding protein 4 (STXBP4)	mRNA [NM_178509]";7	75703108140817;0	173546027536834;1	21208404740442;0	256866772602654;0	386007880001561;0	141706927599974
568;4;76;815;"CAGACGATGGCCAAGAGCAGAAACACAAGCTGGAGCCAGTGTCCTGGTTTGACAGCATGT";"A_23_P100392";"TCEB2";"NM_007108";"ref|Homo sapiens transcription elongation factor B (SIII)	polypeptide 2 (18kDa	elongin B) (TCEB2)	transcript variant 1	mRNA [NM_007108]";11	3372605076382;-0	415446993179469;-7	21371069176431;5	48257630283658e-05;0	000332634437076322;0	122113061764029
569;4;77;1860;"TTTTTTCTAGTGAAGTTAAACAAACATTGGGATACCGACACAGACAACTTGAGACAGTTT";"A_23_P161446";"GDI2";"NM_001494";"ref|Homo sapiens GDP dissociation inhibitor 2 (GDI2)	transcript variant 1	mRNA [NM_001494]";12	1564509555355;0	164763113354701;3	38692816079582;0	00824357960299346;0	0230676862282026;0	846835287980545
570;4;78;1822;"GCCTATTTGGTGTAAGAACAGCCAAGGACAGAGAGTCATGGTTGAGCAGAGTGAAAAACT";"A_33_P3233978";"FBXO18";"NM_178150";"ref|Homo sapiens F-box protein	helicase	18 (FBXO18)	transcript variant 2	mRNA [NM_178150]";6	57820591251347;0	271502751598103;2	25960580987436;0	0507077815899501;0	107396432589473;0	394261860597003
571;4;79;400;"TTCATGTTCCACCTTCCCCTCTTCCCCGCTATTCCACAGGGTCTGGAGGAGAAGAGCAGA";"A_21_P0002073";"XLOC_002217";"ENST00000422600";"gb|DB092709 TESTI4 Homo sapiens cDNA clone TESTI4042421 5'	mRNA sequence [DB092709]";11	0587598707982;0	427979117667496;2	97952411565678;0	0157590804598568;0	0401335239947921;0	147333737825218
572;4;80;2220;"CACAGAGGCAAGGCCAGACTTTTCCGTCGTTTATTTTCAATAAATAAGCAGCTCAGCGCA";"A_33_P3239152";"RABEP2";"NM_024816";"ref|Homo sapiens rabaptin	RAB GTPase binding effector protein 2 (RABEP2)	mRNA [NM_024816]";11	1368225137751;0	720401130096205;9	03666900163867;9	2934624766428e-06;7	85975354792025e-05;2	8.85385e+08
573;4;81;6260;"CATGCTGATGGCAGAGAAGATAAGAACTTGGAGCCCATTTCTCACTGGAGAGGAAAACTT";"A_23_P156319";"LARP1";"NM_015315";"ref|Homo sapiens La ribonucleoprotein domain family	member 1 (LARP1)	transcript variant 1	mRNA [NM_015315]";14	3492538588262;0	495655092374692;7	79418571717469;3	00957472950655e-05;0	000203847852653169;7	4.83436e+08
575;4;83;1310;"CCTTCATTTAGCAGCACATAACTTATGGTGGGGGAAATCAGATAAATATATAAATGTAGG";"A_33_P3385782";"ZNF713";"NM_182633";"ref|Homo sapiens zinc finger protein 713 (ZNF713)	mRNA [NM_182633]";6	29369608070739;0	376277637833151;4	47058947996748;0	00162239725843384;0	0057397475567723;0	210711240264414
576;4;84;501;"CGTGGAGCAGACGCTGCTGGGGCCCCTCCAGCAGGAGCGGTCCTTTCCCATTCACCTGAA";"A_33_P3284888";"DLEU7";"NM_198989";"ref|Homo sapiens deleted in lymphocytic leukemia	7 (DLEU7)	mRNA [NM_198989]";6	07548578020522;0	021530584564414;0	148799471049899;0	885049515468352;0	92500465760869;0	339577440866915
577;4;85;2169;"AACAACTCAGAGAAACATCAAAGAGTCTTGGAATGTCTGATGGCATGCAGGAGCAAACCC";"A_33_P3232280";"C12orf11";"NM_018164";"ref|Homo sapiens chromosome 12 open reading frame 11 (C12orf11)	mRNA [NM_018164]";9	81782288626136;-0	141930345238878;-2	44214100699346;0	0376815967006741;0	0839455716045477;0	308171663170606
578;4;86;797;"ACTCACTCCCCCTGAAAAGCTATCTGAACAGAGGAAGATAATGTAGTGTGAAGTCCCCAT";"A_23_P50646";"LOC390940";"NM_001193621";"ref|Homo sapiens uncharacterized protein ENSP00000244321 (LOC390940)	transcript variant 1	mRNA [NM_001193621]";8	99276778113942;1	48689645100276;19	2450258277534;1	59557879697828e-08;5	97738366551351e-07;2	194351
580;4;88;2666;"AATCTCTGCAATAGGAAATGTTTCGATCATGCAAGTGCTTTCCCAGCCAAATGTCTGTGC";"A_23_P117734";"LYSMD4";"NM_152449";"ref|Homo sapiens LysM	putative peptidoglycan-binding	domain containing 4 (LYSMD4)	mRNA [NM_152449]";8	50813507948518;-0	50906596348641;-8	02851621270325;2	38533258520223e-05;0	000169512704434952;6	2.22962e+07
587;4;95;6947;"TCAGTTGCATTTGGTACAGAATTTTGAGTAATGGTGAAAATTGTTGTCTTTGGAAAGCAC";"A_24_P658584";"SASH1";"NM_015278";"ref|Homo sapiens SAM and SH3 domain containing 1 (SASH1)	mRNA [NM_015278]";9	6929762813994;0	569963428676232;5	3696102907507;0	000478123104687712;0	00202785804813819;0	744444734157709
590;4;98;790;"AAGCCTGGTCAGCCCAAACCACCAGAAGCCCAGAATAAACTGGCAGCTCAGCTGTTTTAT";"A_33_P3383226";"GP9";"NM_000174";"ref|Homo sapiens glycoprotein IX (platelet) (GP9)	mRNA [NM_000174]";7	51009087346052;0	0856853236426858;0	410417708028217;0	691264229706688;0	784485925799168;0	287991764028163
591;4;99;3116;"TGACTTGTTCCTCTGAAAGTGCAAGAGGCGTACACCTTTCCCAAATGTAGACTAGAATCT";"A_23_P109877";"WDR82";"NM_025222";"ref|Homo sapiens WD repeat domain 82 (WDR82)	mRNA [NM_025222]";9	88013186032907;0	198890819090451;1	99587296476796;0	0776242265604203;0	15209130605908;0	558340718231253
593;4;101;2125;"CTCATTCAGCTCAAACAGATTTCATAGCCAAAGCAAAAGGACTGGTACGGTAGTCTGTGG";"A_23_P209805";"NAB1";"NM_005966";"ref|Homo sapiens NGFI-A binding protein 1 (EGR1 binding protein 1) (NAB1)	mRNA [NM_005966]";10	2125401118606;0	22994756581936;1	25936442764712;0	240119994728707;0	367339732655715;0	134853684592725
594;4;102;827;"TTTTTGGGGGACGGAGGACTTGGCCTGGAATTCTGGAATTCCCAGGGGGTCAGACATGGT";"A_23_P406227";"MGC23284";"NR_024399";"ref|Homo sapiens uncharacterized LOC197187 (MGC23284)	transcript variant 2	non-coding RNA [NR_024399]";7	30441247007738;0	248622698481942;3	13468467409259;0	0122901381559879;0	0324097882372933;0	118979216570761
596;4;104;4647;"ACAGGCTAAATGCACCAAGAAAGCTTCTTCAGAGTGAAGAATCTTAATGCTTGTAATTTA";"A_24_P64167";"PTGS1";"NM_000962";"ref|Homo sapiens prostaglandin-endoperoxide synthase 1 (prostaglandin G/H synthase and cyclooxygenase) (PTGS1)	transcript variant 1	mRNA [NM_000962]";6	7144798545458;-1	69895723284115;-16	4641319303278;6	13070622125595e-08;1	57702738768998e-06;5	7.89408e+06
597;4;105;849;"AAGCAGCTAGGTTGCAAGAACATTCCTCTACTTTCTGCTAAGCCTTGGAAACAGTTGGGA";"A_23_P106617";"WFDC1";"NM_021197";"ref|Homo sapiens WAP four-disulfide core domain 1 (WFDC1)	mRNA [NM_021197]";6	00389367457964;0	910240316659511;2	38809952453075;0	0411473302208559;0	0903343625670038;0	331625483293772
598;4;106;1241;"AAACTAGAGAGAGCAGCAAAAACACCAGTCTTGCCTGAGTCTTTCTCCAGCATTTCCAGT";"A_23_P25698";"SLC10A1";"NM_003049";"ref|Homo sapiens solute carrier family 10 (sodium/bile acid cotransporter family)	member 1 (SLC10A1)	mRNA [NM_003049]";6	22546384864188;0	52019324827245;0	957980568951244;0	363526921664404;0	498818707963522;0	183120786380354
599;4;107;1140;"GGTCTGTTGTATCTCCATATCCTTTTGATACTCAACTTTCCTTTAACAACGACAACAAAA";"A_33_P3379701";"TRIM36";"BC017346";"gb|Homo sapiens tripartite motif-containing 36	mRNA (cDNA clone IMAGE:5015503). [BC017346]";6	31542774640028;-0	365724904769932;-1	20945683580562;0	257824709906331;0	3869956231534;0	142069536900345
600;4;108;4938;"TTGTGGGAGCCCACACCAGTCAAGTTGGATTTGAACCCAGCTGCTCTGTACTGCACTTAG";"A_33_P3423631";"WHSC1";"NM_007331";"ref|Homo sapiens Wolf-Hirschhorn syndrome candidate 1 (WHSC1)	transcript variant 8	mRNA [NM_007331]";9	11132724112501;0	0565755081805932;0	881759684581359;0	401236378232937;0	535806365119986;0	196699284453354
602;4;110;1622;"CACAACATGTCTGTCAAGGCCATGAGGTTTCCTCCCAAATCGTACAACAAGGACTTGGAG";"A_24_P289726";"PSMD3";"NM_002809";"ref|Homo sapiens proteasome (prosome	macropain) 26S subunit	non-ATPase	3 (PSMD3)	mRNA [NM_002809]";11	7728517397144;-0	0400461024201118;-0	550224959473842;0	595786283356327;0	708409791546209;0	26006353818825
603;4;111;172;"AAGGGAGGCATGACAGCTCCACATCTGTGTTCACCCTTGTGGATCCCAGGTGAGACTCCA";"A_21_P0003026";"XLOC_002796";"TCONS_00006200";"linc|BROAD Institute lincRNA (XLOC_002796)	lincRNA [TCONS_00006200]";5	98300598457207;0	141962563567197;0	655049337945022;0	529103518093589;0	65245827760008;0	239523239539836
604;4;112;1839;"ATTCATCACTGTGGTGTTCTCCATGTCTGCTAGCCATTTAGGTAAGGGTAGGGCACTTTT";"A_23_P123539";"PPP2R2A";"NM_002717";"ref|Homo sapiens protein phosphatase 2	regulatory subunit B	alpha (PPP2R2A)	transcript variant 1	mRNA [NM_002717]";10	903653125603;0	105385391251634;1	94019574528653;0	0848532196139638;0	163097396199818;0	59874505450351
607;4;115;4776;"GCAGACTATGACGTCTTTAGCTAATGAATTGCCTATTGTTATGGAAAACAGTTAATATGC";"A_23_P117546";"SOS2";"NM_006939";"ref|Homo sapiens son of sevenless homolog 2 (Drosophila) (SOS2)	mRNA [NM_006939]";9	9193293151657;0	113053312342647;1	93441884159039;0	0856389065499244;0	164269394707051;0	603047565312644
608;4;116;359;"TCCTTCCTGTAGTGCTGTCTCTGCTTTTTGCATCTTGCCCAGTATATTATGACACAAATA";"A_21_P0008862";"XLOC_011545";"THC2654585";"linc|BROAD Institute lincRNA (XLOC_011545)	lincRNA [TCONS_00024185]";7	86407490956837;-0	00979047073629857;-0	0861310943985752;0	933280656020849;0	957378753928942;0	351462259703644
609;4;117;951;"TACATACCCAGCACCGACCCCCAGGACTGGCTTACCCAAAAGCAGACCTTGGAGAACAGT";"A_33_P3319463";"NCOA4";"NM_001145261";"ref|Homo sapiens nuclear receptor coactivator 4 (NCOA4)	transcript variant 2	mRNA [NM_001145261]";8	77619026466504;0	199555379094246;2	84070590211028;0	0197150791074354;0	048552173083131;0	178239347753336
611;4;119;5078;"TTAATGTGTGCAAAAGCCCAAAGGTTCCTAAGCCTGGCTGCAAAGAAGAATCAACAGGGA";"A_33_P3304170";"PIK3CG";"NM_002649";"ref|Homo sapiens phosphoinositide-3-kinase	catalytic	gamma polypeptide (PIK3CG)	mRNA [NM_002649]";6	01538694270279;0	388960533118903;1	42022600723806;0	18982071254915;0	306956308031742;0	112686392097574
612;4;120;1799;"CCCAGAACTCTGGGCTGCTTGTGGACAGTCTTTGGCAAAGTCTGAATTTATAAACTGATA";"A_21_P0006170";"XLOC_007438";"TCONS_00016042";"linc|BROAD Institute lincRNA (XLOC_007438)	lincRNA [TCONS_00016042]";6	44798232624481;0	885370210405791;1	52810398996572;0	161427743758588;0	270855873306813;0	99433601274049
614;4;122;401;"CCTGAGTGGGAGTGCACAGTGAGTGCTGCTGTTTTGTGCTAAGTCTGGATGTCTGTACAT";"A_33_P3227551";"ZNF331";"ENST00000509069";"ens|zinc finger protein 331 [Source:HGNC Symbol;Acc:15489] [ENST00000509069]";7	24272694639128;-0	0370063078804392;-0	451549766114988;0	662462804999111;0	761495019284565;0	279551597664437
617;4;125;2340;"GAGTGAGTACTTTGTCCACATGACCAATTGTGAAAATGGAGGGAATAAATGTTTTTATGT";"A_33_P3227842";"EPB41";"NM_001166006";"ref|Homo sapiens erythrocyte membrane protein band 4.1 (elliptocytosis 1	RH-linked) (EPB41)	transcript variant 3	mRNA [NM_001166006]";6	22488313239066;-0	25526964527628;-3	32855971101547;0	00903637248244049;0	0249477064588997;0	915852503566094
619;4;127;953;"GGAAGCCTGGGAGTGTTTGTCCCATCGGTAGCTTGAAATAAACGCTCCCCTCAGACACCC";"A_33_P3397865";"TNNT1";"NM_003283";"ref|Homo sapiens troponin T type 1 (skeletal	slow) (TNNT1)	transcript variant 1	mRNA [NM_003283]";13	8481093605456;-0	792647728993428;-10	5873194596353;2	55184070811163e-06;2	74734807584585e-05;1	8.57593e+06
620;4;128;240;"TCTATTTAGCAGGTGTGTGCTGGAATAGAACGTGGGGCATGGGACCCTGGGCTGGGTAGA";"A_21_P0011774";"TMEM221";"BC039402";"tc|Q25L01_MACFA (Q25L01) Brain cDNA	clone: QtrA-16817	partial (36%) [THC2506252]";6	5638463807672;-0	0271150052355376;-0	287616575066843;0	78026600722424;0	851589372280546;0	312626036344591
622;4;130;1367;"ATTGTTTCCTCAAGGCAGAATTTTCCTGGTTCTGTTTTCTCAGCCAGTTGCTGTGGAAGG";"A_23_P123265";"SUMF2";"NM_015411";"ref|Homo sapiens sulfatase modifying factor 2 (SUMF2)	transcript variant 2	mRNA [NM_015411]";9	48249599439369;0	633322999758043;10	8296328131557;2	11639018218167e-06;2	36661072373089e-05;8	6.88039e+07
623;4;131;9194;"TCAACTTTGCCTTGATAATTATTGTAAACACTTTGTTCATTTTTTCTTTTTTATTCACAA";"A_24_P694760";"ERC1";"NM_178040";"ref|Homo sapiens ELKS/RAB6-interacting/CAST family member 1 (ERC1)	transcript variant epsilon	mRNA [NM_178040]";10	1411247563942;0	257501307127107;3	49711053508262;0	00693893500407969;0	0198873288592166;0	730081538956792
624;4;132;1573;"AAGGTGTGGGCTAATATCAGGCTTCAGGAAAAGGTAAGCAAATCAAAGGTGGGCATAGAG";"A_33_P3288294";"FUT10";"ENST00000335589";"ens|fucosyltransferase 10 (alpha (1	3) fucosyltransferase) [Source:HGNC Symbol;Acc:19234] [ENST00000335589]";7	77668519572267;-0	254960177097582;-0	750254652654262;0	472588352277269;0	602579173321282;0	221212176515012
625;4;133;2681;"GTTGATGTCTCAGGAATAAGCTGGATCTCCAATGTTTTGGGGATGCTTTGAGTCTCAAAA";"A_23_P115922";"EIF4EBP2";"NM_004096";"ref|Homo sapiens eukaryotic translation initiation factor 4E binding protein 2 (EIF4EBP2)	mRNA [NM_004096]";12	1877900357669;-0	181602379776335;-3	41211535892666;0	00792425168296858;0	0222982178347262;0	818587418552495
630;4;138;2292;"ATGATCATAAAATTAAATTTCAGACTTCACTAGTTCTGCGTAACACGACAGGTTGCCTAA";"A_33_P3288110";"PKP4";"NM_001005476";"ref|Homo sapiens plakophilin 4 (PKP4)	transcript variant 2	mRNA [NM_001005476]";10	4067136373561;-0	48900361659588;-6	29875757272653;0	000152241493991619;0	00077212129253521;0	283452597131548
632;4;140;376;"TTTGCCATTCCAGCTGCTCCAACTAAGACTTCCGAGGTTCAGTCTAGAGAGAAATCAAGT";"A_21_P0003648";"XLOC_003679";"TCONS_00008217";"linc|BROAD Institute lincRNA (XLOC_003679)	lincRNA [TCONS_00008217]";6	39780905352501;-0	162531609924596;-0	640402134576954;0	538147681550744;0	66036305067421;0	242425152075159
638;4;146;983;"AGTTGAAATCCAGAATATAGTTACTTTTGGGAGTGGGGACGTTTGTGGATATTAAATCAC";"A_33_P3330811";"C8orf59";"NM_001099670";"ref|Homo sapiens chromosome 8 open reading frame 59 (C8orf59)	transcript variant 1	mRNA [NM_001099670]";7	4547932452276;-0	598053845416173;-5	17592602790491;0	000616011168104253;0	00251947628235827;0	924922162554171
640;4;148;88;"TTGTTGACCTCATCTTGGCTCAAAGAAGACACGGCCCCAGACCCGTGTTGGAGCCACACT";"A_21_P0009279";"XLOC_012317";"TCONS_00025505";"linc|BROAD Institute lincRNA (XLOC_012317)	lincRNA [TCONS_00025505]";7	83216419757432;0	133069926697111;0	611599242690812;0	55619607973571;0	6753599670174;0	247930653513261
642;4;150;364;"GAGGGCACCAAGGCCGTCACCAAGTACACCAGCTCCAAGTAAATTCTCAAGCTCTTGTCC";"A_23_P8013";"HIST1H2BL";"NM_003519";"ref|Homo sapiens histone cluster 1	H2bl (HIST1H2BL)	mRNA [NM_003519]";13	6922335069818;1	21944955229677;23	7637316262038;2	55219216520467e-09;1	63880952680857e-07;6	16215.6
645;4;153;4135;"AAGTAGCAAATATCATGGAGAACTTCAGTGTTTAGCAGGCTGTTAATTTCCCATCTATGA";"A_23_P110569";"TRIM36";"NM_018700";"ref|Homo sapiens tripartite motif containing 36 (TRIM36)	transcript variant 1	mRNA [NM_018700]";8	54427962711189;0	28128538234097;5	45103669086308;0	000430485477302023;0	00185546498362333;0	681157706152357
646;4;154;2850;"AAAGCAAGAAGCATTACTTGCATGATGACCATGAAGGTGAAGGCAGTGACAAGTGGGTGA";"A_21_P0012374";"THRAP3";"NM_005119";"ref|Homo sapiens thyroid hormone receptor associated protein 3 (THRAP3)	mRNA [NM_005119]";7	14395083458166;-0	0412423337564727;-0	472675262452802;0	647891844417337;0	749834905712998;0	275271066215994
647;4;155;5832;"ATACTTGCCATTTGAGCCTCACTGCAAAATTAGTGCAGAGGAGAAAACAATTTTTAATGT";"A_23_P25503";"FNDC3A";"NM_001079673";"ref|Homo sapiens fibronectin type III domain containing 3A (FNDC3A)	transcript variant 1	mRNA [NM_001079673]";10	9332197896884;-0	33436900540244;-5	01192616131715;0	000766628145979199;0	00303035176730262;0	111246909905018
648;4;156;2025;"TCCCTGTATTTTCTTTCTCTACTTTGAGGAAACCAAAGTAACCTTTTGCACCTGCTCTCT";"A_23_P23829";"CD34";"NM_001773";"ref|Homo sapiens CD34 molecule (CD34)	transcript variant 2	mRNA [NM_001773]";5	79004398342479;-1	01910848856611;-3	75454217367386;0	00466627618327137;0	0141447595683565;0	519266710323123
649;4;157;0;"GCAGGGACCTTCCTCCTGGCCCTGTGGCCGGCAGCCACGGGAGACCCCGGAGCAAGATGA";"A_33_P3242416";"A_33_P3242416";"A_33_P3242416";"Unknown";7	15776247958718;-0	378486885532944;-1	97263751827852;0	0805666766929601;0	156456197934914;0	574364624712852
652;4;160;502;"GACTGGTATGGCTCTTCCTACAAACCAGCTCATCGGCATTATAGTCTTGATCAGTTCTTG";"A_33_P3221688";"ENST00000418025";"ENST00000418025";"gb|DA292495 BRHIP2 Homo sapiens cDNA clone BRHIP2004426 5'	mRNA sequence [DA292495]";6	21543090581079;-1	03463502090688;-1	76376991645537;0	112189331691047;0	203578024913606;0	747353044638916
653;4;161;0;"CCTCGCATAGTGAGGACAATTAAGACTTTCTCCATGATTTTAGCAAGTTCAAAAAAGAAA";"A_33_P3399778";"A_33_P3399778";"A_33_P3399778";"Unknown";6	73796818794339;-0	419219665744336;-3	25446244942349;0	0101589077217648;0	0275436313417656;0	101115121597315
654;4;162;0;"TTATCCTCATTGATCCATTCTATGAAGTTATCAGAAGAAATCCTGACACCCAGTCGATCA";"A_24_P246692";"A_24_P246692";"A_24_P246692";"Unknown";15	3482763428866;0	253078745434429;4	94461170586804;0	000839581005600264;0	00326893124745511;0	120005374918911
659;5;3;1325;"GCAACAATCCATCTCTCAAGTAGTGTATCACAGTAGTAGCCTCCAGGTTTCCTTAAGGGA";"A_23_P121253";"TNFSF10";"NM_003810";"ref|Homo sapiens tumor necrosis factor (ligand) superfamily	member 10 (TNFSF10)	transcript variant 1	mRNA [NM_003810]";9	97268327318348;-2	19890509266835;-34	2786946752493;1	03228966762498e-10;1	63640795587053e-08;6	739.922
660;5;4;745;"GAAATATGATGCCTTTTCCGTCTTTGTATCACGTTACCCCAAATTAAGTATGTTTGAATG";"A_23_P144394";"CSN2";"NM_001891";"ref|Homo sapiens casein beta (CSN2)	mRNA [NM_001891]";5	98186208416789;-0	14902817974193;-0	402334469715549;0	696988585589853;0	788978918118808;0	289641181489133
663;5;7;2630;"GAGTCAGGCCCGGCCTATTGCTTGGGTCTCTCTCTATTTATATATCTAAGTTCACAGTGT";"A_23_P149678";"PIAS3";"NM_006099";"ref|Homo sapiens protein inhibitor of activated STAT	3 (PIAS3)	mRNA [NM_006099]";11	3377565002922;-0	12512558765127;-2	43989144202032;0	0378198890058639;0	0841892418044091;0	309066198157039
668;5;12;1688;"ACAAGCAGACATTCTGTATATTCCAGTAGTGAAGCCCTTGATGCCCGAAACCACTGCATT";"A_21_P0012676";"GK3P";"NR_026575";"ref|Homo sapiens glycerol kinase 3 pseudogene (GK3P)	non-coding RNA [NR_026575]";7	02245036552271;-0	291706404515138;-2	42463532188372;0	0387711997861035;0	086009734531698;0	315749388953589
669;5;13;294;"GCATCTTACCTCGAAAGCATTCATCAGGACAGTGGCTCCCAATTGTGAGTTATTATTATT";"A_21_P0002833";"XLOC_003016";"ENST00000418972";"linc|BROAD Institute lincRNA (XLOC_003016)	lincRNA [TCONS_00005723]";5	75419698664923;0	101178391608142;0	88217279417958;0	401024758015549;0	535609558933359;0	196627035150983
670;5;14;3589;"TATTTGTAATGACTTCTGGCAAAAGCACGTGTCCTGGCCGGATGTAACTGTTCTCCTTTC";"A_33_P3311863";"AP2A2";"NM_001242837";"ref|Homo sapiens adaptor-related protein complex 2	alpha 2 subunit (AP2A2)	transcript variant 1	mRNA [NM_001242837]";7	1710453783084;-0	221929318330527;-1	42263811135665;0	1891411079502;0	30624205553899;0	112424183651783
671;5;15;2497;"TGGTGAAACTCTCAGAGTATAACATCCTGAATAATAAGGACACTCTCCTCCAGGCTCTGC";"A_33_P3275600";"PLA2G4E";"NM_001206670";"ref|Homo sapiens phospholipase A2	group IVE (PLA2G4E)	mRNA [NM_001206670]";5	80806882189093;0	0627504606276243;0	362164322227262;0	725732053262552;0	811324609535542;0	297844483649052
672;5;16;4612;"TTCTCATCTGGAACTGAAACTTTCTGGATTTCTCTTGAAGTGCTACACTGCACTGAATGT";"A_23_P402610";"PFAS";"NM_012393";"ref|Homo sapiens phosphoribosylformylglycinamidine synthase (PFAS)	mRNA [NM_012393]";8	30531989858448;-0	435720262983258;-3	16024099711432;0	0117993876510518;0	0313287371791128;0	115010581939964
674;5;18;3110;"TATGATATGCCAGAGATGAGTTAGTGTTTCTTGACGTTGGAGACCTATAAATGCCTCATC";"A_23_P205830";"BTBD1";"NM_025238";"ref|Homo sapiens BTB (POZ) domain containing 1 (BTBD1)	transcript variant 1	mRNA [NM_025238]";12	1210734980342;-0	00597311618970586;-0	0993034689899628;0	923111782062603;0	950857385731721;0	34906820740872
675;5;19;0;"TTGACTCTGGGCAAGGTACTTCACCTCTCAAGTCCCAGAGAAGCAGAGAAAGCAAGGGCA";"A_33_P3324680";"A_33_P3324680";"A_33_P3324680";"Unknown";6	22737698789576;-0	497523396579911;-1	2959832992091;0	227779743306075;0	353012338053204;0	129593970543297
677;5;21;1190;"AGAAAAGGAAACTTTTGAGCTGCACCTTCAGTTTATCCTCAAAGCCTGCGTTGTTTGTCT";"A_23_P83838";"CA8";"NM_004056";"ref|Homo sapiens carbonic anhydrase VIII (CA8)	mRNA [NM_004056]";6	59306340349234;0	584466279587787;1	3457095058605;0	211877572482197;0	334521650597443;0	122805874640808
679;5;23;397;"CCGAGGAGAAGCAGGGTCTAATCTATTTCTGACAATGTATTTAAATAAAAATTCTGCATG";"A_21_P0013813";"XLOC_l2_015716";"TCONS_l2_00030477";"linc|BROAD Institute lincRNA (XLOC_l2_015716)	lincRNA [TCONS_l2_00030477]";7	22369259016313;-0	660930164870758;-6	88151726494825;7	85480556077282e-05;0	000447218051920859;0	164177726383964
680;5;24;896;"ATATACATCGAACCCAAGCTGTAAATGCTCTTGAGTAGAAGCAACTTAAACTAGCCTTCG";"A_33_P3388636";"FLJ40606";"AK097925";"gb|Homo sapiens cDNA FLJ40606 fis	clone THYMU2011939. [AK097925]";6	02961753955778;-0	63162983247765;-2	01345954705182;0	0754656983700349;0	148500684727265;0	545159227814416
681;5;25;561;"GGGGTTAGTCCTTGCTGTATTATGCTTGGTTATAATTTTTCATCTTTCCCTTGCGGTACT";"A_21_P0003243";"XLOC_002730";"THC2496390";"tc|Q8IZQ1_HUMAN (Q8IZQ1) ALFY	complete [THC2496390]";10	2610229393729;0	0643307470692207;0	373900529852827;0	717284618354215;0	804909605546164;0	295489478601298
685;5;29;2699;"CAGTAAGGGCTTACTTTTTACCAACTTGTGTGTGTGTAAAGATGTATTTGTTCAAGCTTT";"A_33_P3305203";"LOC283588";"XR_110237";"ref|PREDICTED: Homo sapiens hypothetical LOC283588 (LOC283588)	miscRNA [XR_110237]";6	80425922429748;0	241794456411998;2	11771028720859;0	063806975468023;0	129562624341304;0	475635922953736
687;5;31;2328;"AACCATGCTTTCTTGTAGTACTGATTGAAACTTACACGTTTTATTCTACTCATAGTGAGC";"A_24_P91916";"NXT2";"NM_018698";"ref|Homo sapiens nuclear transport factor 2-like export factor 2 (NXT2)	transcript variant 1	mRNA [NM_018698]";9	41336671513007;0	381524839763999;3	85780905707834;0	00398922779508944;0	0123888059623158;0	454804090928119
690;5;34;2825;"TGTGCAGCGGGACTCACCTGTTATTGTCCGCAACCCTGATGTGCCACTGCCCTCCAAATT";"A_19_P00810474";"LOC100652741";"XM_003403479";"ref|PREDICTED: Homo sapiens protein capicua homolog (LOC100652741)	mRNA [XM_003403479]";8	95674849208959;0	100915421062817;0	940782785347772;0	371800838688178;0	507064125820379;0	186147752646609
691;5;35;3301;"GGGCACATGTGTTTCCTGACTTCACATTTAGGTCAGAGAAGGAAAGTGTGAACTCAGATT";"A_23_P26928";"ENST00000331733";"ENST00000331733";"ens|family with sequence similarity 187	member A [Source:HGNC Symbol;Acc:35153] [ENST00000331733]";7	53573337061171;0	179624504138673;0	459313181477171;0	657090177076037;0	757254916169355;0	277995018080722
692;5;36;2446;"AACCTTAGCTGGGGCCAACAGCCTCAGGAACTTCACCTCCCGATTCTAAGAAGAGACTGT";"A_23_P23296";"PKP1";"NM_000299";"ref|Homo sapiens plakophilin 1 (ectodermal dysplasia/skin fragility syndrome) (PKP1)	transcript variant 1b	mRNA [NM_000299]";6	16229461385535;0	180219104583486;0	911137715555504;0	38638386123999;0	521465888890408;0	191434768022223
694;5;38;1269;"ACAACGCTGGAAAGGCCGAGAACCTCTTTTATGCTCATGTCTTGCATTTATTGAGATGAC";"A_23_P118894";"PRR15L";"NM_024320";"ref|Homo sapiens proline rich 15-like (PRR15L)	mRNA [NM_024320]";5	90666536803023;-0	41053489307553;-1	11667530849979;0	293551834434747;0	426513669984577;0	156576963539343
695;5;39;1451;"TTCCCCAATGCGCTCTACACCCACTGCTACAACTGGCCGGAGATGAAGCTCTTTGTGGCT";"A_33_P3309999";"DCAF12L2";"NM_001013628";"ref|Homo sapiens DDB1 and CUL4 associated factor 12-like 2 (DCAF12L2)	mRNA [NM_001013628]";7	71959197264644;0	025047507793472;0	157027234496636;0	878749735481817;0	920842960949717;0	338049644990976
696;5;40;1841;"GTTCATTTGTGTGATCATGTATAGACCTCAGAACGGAAGATAGGACTGTATATAATTGTA";"A_23_P160787";"PEX14";"NM_004565";"ref|Homo sapiens peroxisomal biogenesis factor 14 (PEX14)	mRNA [NM_004565]";12	5288946152064;-0	300955077979383;-5	13591274915682;0	000649548829357969;0	00263953546265178;0	968996955974181
697;5;41;426;"TTCCCCTGGTTCTAGGAACTTTTGACTGGAGAGAATCACAGATGTGGAATATTTGTCATA";"A_24_P280803";"RPS21";"ENST00000492356";"ens|ribosomal protein S21 [Source:HGNC Symbol;Acc:10409] [ENST00000492356]";16	6880681988682;-0	0755486426285898;-1	18385991768095;0	267310915568625;0	397544378546924;0	145942078872322
698;5;42;610;"TATTGGCAGCTAGACAGTTAGAAATTAAACAGATTCCATCTGATGGCCACTGTATGTATA";"A_23_P111929";"OTUD6B";"NM_016023";"ref|Homo sapiens OTU domain containing 6B (OTUD6B)	mRNA [NM_016023]";7	15520708902915;0	118697915913857;2	19982867448071;0	0558704661908404;0	116324508412348;0	427037621398414
701;5;45;815;"CACCACCGACGATGTGGGTATGGAACCCCCTCTGGATACAGAACCCCTTCTTTTCCAAAT";"A_33_P3627001";"PEBP4";"NM_144962";"ref|Homo sapiens phosphatidylethanolamine-binding protein 4 (PEBP4)	mRNA [NM_144962]";7	24196663403481;0	699936059294495;6	82341713014006;8	37535748554426e-05;0	000471022376590029;0	17291650579035
703;5;47;1107;"TTCATAAGGCAGAAGTGGCCCCTGTGCTATCCATGAAGAGTTTCTGTATTTCTCTGCAAG";"A_21_P0009475";"XLOC_012667";"TCONS_00026327";"linc|BROAD Institute lincRNA (XLOC_012667)	lincRNA [TCONS_00026327]";7	50192392237216;-0	342608125299686;-0	921463292298152;0	381258394817883;0	516108089580645;0	189467872219784
704;5;48;1067;"GTGACTTGGGGGACCAGCAGCAGAGATGAAGACTTGGAAAACTGCTCTCACCACCTATGA";"A_33_P3399263";"IL15RA";"NM_001243539";"ref|Homo sapiens interleukin 15 receptor	alpha (IL15RA)	transcript variant 3	mRNA [NM_001243539]";9	95199706851069;0	248423555506475;1	16857262263213;0	273109803498285;0	403984071550209;0	148306147476773
705;5;49;9;"CCTTCCTTCGGTGTTTGAGACCACTTCATCTGGACCGAGCTAAAGTCTAGGAAGAAATAA";"A_23_P108932";"RPL23AP32";"NR_002229";"ref|Homo sapiens ribosomal protein L23a pseudogene 32 (RPL23AP32)	non-coding RNA [NR_002229]";8	67865876642615;0	696678197251547;10	4901461116522;2	75355972281062e-06;2	92151506363488e-05;1	7.25142e+07
707;5;51;4043;"AGTCTACATGGGCAAAGTGACCTTCTCATGTGCGGCTGGTTTTGGACAGCGACACCGGCT";"A_33_P3264577";"DCTN1";"NM_004082";"ref|Homo sapiens dynactin 1 (DCTN1)	transcript variant 1	mRNA [NM_004082]";11	2638330638686;0	8810337289054;12	2867806006477;7	38340633367339e-07;1	0466872943507e-05;3	8.42482e+06
709;5;53;947;"GTATAAAAAGGTGACTTCGTCTAAATTTTTTCTTCCAATTAAGGAAAGTGCCACAAGCAC";"A_33_P3330872";"MSL3";"NM_078629";"ref|Homo sapiens male-specific lethal 3 homolog (Drosophila) (MSL3)	transcript variant 1	mRNA [NM_078629]";5	99396840516183;-0	0675834716150927;-0	57284072872451;0	581022122182331;0	696283167311936;0	25561174652433
710;5;54;4442;"TAGTGTGTCACTGATCCCCCTTCGAGGTAGTGAAAATGAAATGCGCCGGAGTGTGGCTGC";"A_24_P398432";"ARAP1";"NM_001040118";"ref|Homo sapiens ArfGAP with RhoGAP domain	ankyrin repeat and PH domain 1 (ARAP1)	transcript variant 3	mRNA [NM_001040118]";9	20814774255178;0	594080362067235;4	89660407421059;0	000896172096043511;0	00345923922851682;0	126991750247285
712;5;56;3832;"TAATCAACAAGCTCTTGTCTCATGGAGTGCCTCTGCCTAATTGGCTTATAAACAGTCACA";"A_33_P3311160";"AB385295";"AB385295";"gb|Synthetic construct DNA	clone: pF1KA0197	Homo sapiens NUP160 gene for nucleoporin 160kDa	complete cds	without stop codon	in Flexi system. [AB385295]";9	30189337678321;-0	494836910321125;-6	01843816042538;0	000212451646079114;0	00102018633344338;0	374519481030178
713;5;57;0;"TATCCGGGAGTGACTGCGTTTTGGAGGTGGTTCAGCTCCTGCTAGAGCTCTGTGCAAGCA";"A_33_P3297150";"A_33_P3297150";"A_33_P3297150";"Unknown";6	38454696314971;0	0145791032112816;0	0354247845059167;0	972527692419032;0	982811543988181;0	360798863245456
714;5;58;585;"TGAAATATACCAAATTCTGCATCTCCAGAGGAAAATAAGAAATAAAGATGAATTGTTGCA";"A_24_P270460";"IFI27";"NM_005532";"ref|Homo sapiens interferon	alpha-inducible protein 27 (IFI27)	transcript variant 2	mRNA [NM_005532]";12	4955581240108;-0	9595241204388;-13	1504004715373;4	16548331423192e-07;6	6656018424656e-06;2	4.47002e+07
715;5;59;10543;"GTACTTTGAATTGATAGTCCTTTATGCAATGTCTTAGCAATAGTCTCTATAATGCCCATC";"A_24_P942250";"CHD9";"NM_025134";"ref|Homo sapiens chromodomain helicase DNA binding protein 9 (CHD9)	mRNA [NM_025134]";9	44384442916192;0	992015734078931;13	2495397329832;3	90916934081041e-07;6	34697625566494e-06;2	3.30031e+07
716;5;60;1572;"TGTCCTCCCATCATTACTTTTGTGGCCAGTATTGTGAAACAAGTGGTGAGGGGTCTTTCA";"A_32_P158786";"C12orf56";"NM_001170633";"ref|Homo sapiens chromosome 12 open reading frame 56 (C12orf56)	transcript variant 1	mRNA [NM_001170633]";6	65197494289314;-0	525952229223083;-1	21850995576586;0	254535992457611;0	383486353576518;0	140781252811797
717;5;61;131;"ATATTAGGAAAAGAAAGCATACTACACCCATCTCAGAGCTGGCCTCTTGAGGTAGCCACA";"A_21_P0003905";"XLOC_004135";"TCONS_00009151";"linc|BROAD Institute lincRNA (XLOC_004135)	lincRNA [TCONS_00009151]";6	22197031288392;0	0368746710198371;0	0750316057558665;0	941859339686491;0	963200608609378;0	353599514362007
718;5;62;708;"TCTCGGTGAAGGAGGAGACCAAGGAGGATGCTGAGGAGAAGCAATAAATCGTCTTATTTT";"A_23_P91590";"RANBP1";"NM_002882";"ref|Homo sapiens RAN binding protein 1 (RANBP1)	mRNA [NM_002882]";14	6409609797465;-0	209237218105308;-3	45589041749828;0	00739968564763928;0	0210113724645753;0	771346179928145
720;5;64;1341;"AGCACTCTCGATTCATAATAGGTTCTGTGTCTGAAGATAACTCAGAGGATGAGATCAGCA";"A_32_P215318";"ACACA";"NM_198839";"ref|Homo sapiens acetyl-CoA carboxylase alpha (ACACA)	transcript variant 2	mRNA [NM_198839]";7	07250781375588;0	294196040682954;2	870052818507;0	0188014122154608;0	0466663667638664;0	171316384948781
722;5;66;864;"ATTTTTCTAGAGATCTGGGTGTGAATCCTTTTGTGCTTCTGAGGTGGGTGGTGAGAGACA";"A_33_P3362981";"KCTD5";"NM_018992";"ref|Homo sapiens potassium channel tetramerisation domain containing 5 (KCTD5)	mRNA [NM_018992]";7	74725082736446;0	161504508179572;1	42500420966377;0	188476514548441;0	305473394015051;0	112142001166489
723;5;67;1876;"TACAATAGACTGAAGCAAGTGAAGGGATCTGCAGATTACAAAAGTAAGAAGAATCATTGC";"A_24_P102053";"OCLN";"NM_002538";"ref|Homo sapiens occludin (OCLN)	transcript variant 1	mRNA [NM_002538]";7	69912312993886;0	497649530558502;1	62033570573861;0	140207711781819;0	242744077319575;0	891135108172103
724;5;68;0;"TGTGCGGTTGCCCAGAAAACGTAATGCGGGTGAAGATTCACCAAATAAGCTCCATACTTT";"A_24_P606663";"A_24_P606663";"A_24_P606663";"Unknown";14	5760190267589;0	753516563701709;9	05521779620224;9	14113854614532e-06;7	75130008998568e-05;2	845571
728;5;72;0;"TATGTTATCTACGGGATTCGTATTCTCCGTGATGGCCGAAAATGCTCAGTTCCTAAGGGT";"A_33_P3350452";"A_33_P3350452";"A_33_P3350452";"Unknown";9	80995541102068;0	346566870856945;5	31519520754249;0	000513127465419063;0	00215286073496551;0	790334332815563
729;5;73;4124;"ATGAGAAGTCCCTTTCTGCAGAACAGGGTGTTACAGATGGGACCTCAGACATTCCTGAAA";"A_33_P3401452";"CHD6";"NM_032221";"ref|Homo sapiens chromodomain helicase DNA binding protein 6 (CHD6)	mRNA [NM_032221]";6	21227406564968;-0	0744895902412788;-0	71249354629236;0	494526313664423;0	622023795095416;0	228350470194263
730;5;74;718;"GTGCTCCTCCTGCAGATCACTGTTGGCCTCATCTTCCTCTGCCTGCAGTACAGACTGAGA";"A_33_P3414242";"MOG";"NM_001008229";"ref|Homo sapiens myelin oligodendrocyte glycoprotein (MOG)	transcript variant beta2	mRNA [NM_001008229]";8	80413474543937;0	228292668698984;1	20236890208529;0	260423657344037;0	389878264402471;0	143127780153765
731;5;75;2056;"AAAGCATGAGCCTTTAAGCTGACTCATGTGAAAATTGGCAGGGTTTAGTGTGGCTGGAGA";"A_33_P3356525";"FLJ45482";"AK127393";"gb|Homo sapiens cDNA FLJ45482 fis	clone BRTHA2001953. [AK127393]";10	0150065372297;0	0309702725622092;0	585575804717776;0	572797753421288;0	689431167904587;0	25309631657008
733;5;77;2199;"CCTAAAAGCAGTATCTGTTATTTAGCTGTAAACCAAGTTGGAAGCTATTCGGATAATTTC";"A_21_P0013755";"FAM3C";"NM_014888";"ref|Homo sapiens family with sequence similarity 3	member C (FAM3C)	transcript variant 1	mRNA [NM_014888]";12	0480674580574;-0	329940444306647;-2	95610245382876;0	0163644711363475;0	0414293667821306;0	152090892006775
734;5;78;3551;"TTTGTACATATGCAGAGTACGGTATTTCTGTATGGAATCTGCTTTATTCCTATTTTTCCC";"A_24_P185314";"NAPG";"NM_003826";"ref|Homo sapiens N-ethylmaleimide-sensitive factor attachment protein	gamma (NAPG)	mRNA [NM_003826]";11	8603125270092;-0	151545644074442;-1	40635768762692;0	19376921693574;0	31213362371688;0	1145870307554
735;5;79;3505;"CATTCCCTTCACCAGCTTGTGCACCCTATTCTGTAACTGATAATAAATGGTTGGTATTGC";"A_33_P3419632";"GLB1L3";"ENST00000389887";"ens|galactosidase	beta 1-like 3 [Source:HGNC Symbol;Acc:25147] [ENST00000389887]";6	66496117658275;0	192834949740288;0	904353600474656;0	389778234513518;0	524924192786985;0	192704342156018
738;5;82;1132;"TGCCACCTCTGGGCTCAGGTCCTCATGCCTCCAAATGGCATCTAGAGTTTGAGCAGCCTT";"A_24_P92367";"YDJC";"NM_001017964";"ref|Homo sapiens YdjC homolog (bacterial) (YDJC)	mRNA [NM_001017964]";11	6879070820601;0	000811875182925803;0	0133844564109758;0	989618136390947;0	993539189126156;0	364737077234453
742;5;86;779;"TCTCTGTGTCTCTTCTCTTCTTTATAAAGACATAGTTATAATGGATTAGGGCCCACCCTA";"A_33_P3335735";"LOC100128977";"NR_024559";"ref|Homo sapiens uncharacterized LOC100128977 (LOC100128977)	non-coding RNA [NR_024559]";6	78427363943607;0	073774459048912;0	65482954991773;0	529238554952791;0	652574783446272;0	239566009872688
744;5;88;911;"TAGGAGAGTAAAAGCCACAATAGAGCAGTTTATGAAGATCTTGGAGGAGATTGACACACT";"A_33_P3290924";"BAG1";"NM_001172415";"ref|Homo sapiens BCL2-associated athanogene (BAG1)	transcript variant 1	mRNA [NM_001172415]";11	4059546859894;0	141886014535656;2	76973296926801;0	0221168472051076;0	0536133760346719;0	19681947415438
745;5;89;576;"TTACAAACAACCCCGAGGAACCATTTAGCTCCCCGAAGACCAACAGAATCTGTGTACAAT";"A_21_P0003452";"XLOC_003911";"ENST00000503085";"linc|BROAD Institute lincRNA (XLOC_003911)	lincRNA [TCONS_00007729]";6	44882098572051;0	494652959126368;1	30886009099861;0	223568393291924;0	348140640074618;0	127805526865055
746;5;90;3838;"CAATGAGAAAGCAGATACACCTAAGCCATCATCAACCACTAACATCTCAACTTGCCAGTT";"A_23_P114689";"ASAP3";"NM_017707";"ref|Homo sapiens ArfGAP with SH3 domain	ankyrin repeat and PH domain 3 (ASAP3)	transcript variant 1	mRNA [NM_017707]";9	41667629052028;0	0440690792723082;0	812087996637429;0	438052677973385;0	571033588964739;0	209631511792589
748;5;92;2405;"GATGTCTATTCTTGTTGGAGACATGGGATGATTATTTTCTGTTCTATTTGTGCTTAGTCC";"A_23_P104464";"ALOX5";"NM_000698";"ref|Homo sapiens arachidonate 5-lipoxygenase (ALOX5)	mRNA [NM_000698]";8	07575114308099;-4	17145864115471;-63	758918688611;4	36050757024346e-13;5	01146905751552e-10;1	8397.55
749;5;93;10;"TTGGACATGAGAAGATGAGGGAAGGAGGCTCTGGGCAAAGGGAAGAGAGTGGCAAAGAAA";"A_21_P0002945";"LOC729454";"XM_001130287";"ref|PREDICTED: Homo sapiens destrin-like (LOC729454)	mRNA [XM_001130287]";6	04038347203378;-0	190175438638199;-1	08963897873518;0	304670606684395;0	438102691054284;0	160831396297744
750;5;94;165;"TATGCCCCCGTGGATGGATACCAGGGGTGTCATGCAAGCAGGTGCTCGTATGTTATCTGC";"A_21_P0005646";"XLOC_006689";"TCONS_00014579";"linc|BROAD Institute lincRNA (XLOC_006689)	lincRNA [TCONS_00014579]";6	06932178370196;0	0186075902496752;0	175847710035109;0	864374076520317;0	910820844900744;0	33437043700863
752;5;96;256;"TTTGTGCCCTGCTTCCAATCATGCCAGGCCTCGGGGTCCCTGTCTCTAACTTCACCATGA";"A_33_P3267195";"KU-MEL-3";"XR_108704";"ref|PREDICTED: Homo sapiens KU-MEL-3 (KU-MEL-3)	miscRNA [XR_108704]";8	51593552428486;0	129011042919746;0	580661405213323;0	575963782311017;0	692077014105841;0	254067630254351
753;5;97;2636;"GTGGCAGTCTTGGTCAGTAGTTTAAAGAGTTTCCCTACTTTTTAACCCTTTTTGAAATAA";"A_33_P3400943";"C16orf5";"NM_001199054";"ref|Homo sapiens chromosome 16 open reading frame 5 (C16orf5)	transcript variant 1	mRNA [NM_001199054]";10	7319781357163;0	573933582802272;1	61511491693891;0	14133837012607;0	244241689971911;0	896632977482347
756;5;100;2324;"AGAAGGGCAAGTTTATCAAAAACATTGTTTCAGGAGAAGGGAGCATAAGTTTACAGCCTA";"A_23_P344037";"CHFR";"NM_018223";"ref|Homo sapiens checkpoint with forkhead and ring finger domains (CHFR)	transcript variant 4	mRNA [NM_018223]";8	50080180990488;-0	0214370863553164;-0	0774012351178688;0	940027169723791;0	961968909295669;0	353147346583795
758;5;102;879;"CAACCAGTTTGTGCCCAGGCTCTACGGTTTCAAGATCCATCCGATGGCCTACCAGCTGCA";"A_24_P97931";"CSNK2B";"NM_001320";"ref|Homo sapiens casein kinase 2	beta polypeptide (CSNK2B)	mRNA [NM_001320]";14	5619265211257;0	411631301864245;3	74558089877569;0	00473050355174387;0	0143165244329087;0	52557235134403
759;5;103;3142;"AAGTTCTTGTAGTAGGTAGGGGGTACTACTAGGGATATCTGTGGCATGATTATGCATTCC";"A_23_P121545";"GPM6A";"NM_201591";"ref|Homo sapiens glycoprotein M6A (GPM6A)	transcript variant 2	mRNA [NM_201591]";5	96995843531572;0	127557227582853;1	82465738749861;0	101937962774069;0	188537481583398;0	692137871706453
762;5;106;0;"ATTCGATCCGAGGTTTCTAGTCCCCAGCTGGACATCACAGCACCAACTCCCACTCAGGAG";"A_33_P3360227";"A_33_P3360227";"A_33_P3360227";"Unknown";6	10208047217526;0	778262799462185;2	28068895403413;0	0490009930039952;0	104420366523314;0	383336457245954
763;5;107;183;"ATCTCACAAGGGTGTTAAAAGCACTTGGCCCTAAAGAGAAAACACTAGGAGGATGGGAAC";"A_21_P0006578";"XLOC_008151";"TCONS_00017503";"linc|BROAD Institute lincRNA (XLOC_008151)	lincRNA [TCONS_00017503]";6	32505897044732;-0	403023410226334;-2	12191144640222;0	0633756218077583;0	128865633121045;0	473077206163121
764;5;108;2087;"TGTAGGGCTTATGACTGTGAATCCTTGATGTCATGATTTTATGTGACGATTCCTAGGAGT";"A_23_P103919";"B4GALT3";"NM_003779";"ref|Homo sapiens UDP-Gal:betaGlcNAc beta 1	4- galactosyltransferase	polypeptide 3 (B4GALT3)	transcript variant 2	mRNA [NM_003779]";12	1568732027803;-0	193169889056776;-2	38501444829964;0	0413544740639494;0	0907148585806335;0	333022318017853
766;5;110;354;"GAAGTCTGCTTGGTGACCCGTCCAGACCTGACTTGGTATAAATGATTTTGTTGCAGAGAA";"A_21_P0014160";"LOC100505697";"XR_108646";"ref|PREDICTED: Homo sapiens hypothetical LOC100505697 (LOC100505697)	miscRNA [XR_108646]";6	1174849424987;0	216897484528294;1	02484214730623;0	332651567139374;0	467006693593276;0	1714423128291
769;5;113;7957;"CTTTATTAAGAGAAACAATTATGTTTGGAATTCAGCATCTTTGGTTGGAACGCATTGGCT";"A_33_P3378707";"LOC646214";"NR_027053";"ref|Homo sapiens p21 protein (Cdc42/Rac)-activated kinase 2 pseudogene (LOC646214)	non-coding RNA [NR_027053]";8	51741114489784;0	144188609363203;1	84923388067477;0	0980532803620927;0	182742793406498;0	670865055774688
770;5;114;1387;"TACTAAATCAGCATAGGACTAATAACTGCCTCCCGTGTAAACTGGTCTATCCGGAGAGTG";"A_21_P0000753";"LOC100507086";"NR_038289";"ref|Homo sapiens uncharacterized LOC100507086 (LOC100507086)	non-coding RNA [NR_038289]";6	72385723841876;0	403932371915157;1	62364861147483;0	139494485596209;0	241847559209418;0	887843910413974
771;5;115;1107;"CTTGGCCTGCGAAGGTGAACCTGCCCAGATTTATCAGTAGAGGCTGGACTCCCTCTGTGT";"A_23_P97328";"C1orf35";"NM_024319";"ref|Homo sapiens chromosome 1 open reading frame 35 (C1orf35)	mRNA [NM_024319]";12	7193609529201;0	00341088914207788;0	0599345571107159;0	953540233981375;0	970796150642896;0	356387905430661
772;5;116;2310;"GAAAAAACAGCCCTTTCAACAAATGGTGCTGAACAATTGGACATCCACATGCAAAGAAAA";"A_33_P3313660";"BRD7P3";"NR_002730";"ref|Homo sapiens bromodomain containing 7 pseudogene 3 (BRD7P3)	non-coding RNA [NR_002730]";7	73815044803579;0	394709255011923;5	10857316441451;0	000673596548033099;0	0027193999392429;0	998315915996606
775;5;119;1249;"CAGACCAAGCCTCCTGATGCCTTTCTGCACTGCAACTGTGTGATTGAAAAATGAGATGTT";"A_23_P14928";"COQ9";"NM_020312";"ref|Homo sapiens coenzyme Q9 homolog (S. cerevisiae) (COQ9)	nuclear gene encoding mitochondrial protein	mRNA [NM_020312]";10	8891595343977;0	781760532076108;10	3718161878264;3	02335173837974e-06;3	15983952390582e-05;1	1.60005e+08
780;5;124;0;"AGTGTTCATTTTCTGGCTACCTGCTCACTCTGTGCTCTCAGTTTCCTTTCCAAGAGATCA";"A_33_P3349501";"A_33_P3349501";"A_33_P3349501";"Unknown";7	53225415671145;0	0601685663554976;0	518372645380924;0	616916705498885;0	725731842639837;0	26642261728321
781;5;125;367;"AAAGAAATCTCTCTCCTGACTTTAGTACAATGGCACGATTGGTGGCCACAGTCCAAGGAT";"A_21_P0011487";"XLOC_l2_005517";"THC2630320";"linc|BROAD Institute lincRNA (XLOC_l2_005517)	lincRNA [TCONS_l2_00010221]";7	70840373603087;0	0991541002809759;0	42722156601584;0	679430763503047;0	775294562942025;0	28461753293491
783;5;127;4000;"GTTCTGAGGAGGAGGAGGAAGATTACAGATCTATTCTGAGTATTTTTTAGAGAGTTAATA";"A_23_P103511";"C1orf226";"NM_001085375";"ref|Homo sapiens chromosome 1 open reading frame 226 (C1orf226)	transcript variant 2	mRNA [NM_001085375]";9	91644266587636;-0	868964754050737;-17	2022281691585;4	20442198023276e-08;1	19521465833825e-06;4	3.87739e+06
784;5;128;202;"CTGACAATTTAAGTCAATTCACTCTCCAAAATGTTGCACCCCTGCTGCGTGTTAAGCTCA";"A_21_P0005693";"XLOC_006790";"ENST00000521660";"linc|BROAD Institute lincRNA (XLOC_006790)	lincRNA [TCONS_00014691]";6	72159386438809;0	0403548305341523;0	436995838726756;0	672589883629644;0	769918271741674;0	282643848594887
785;5;129;1753;"TCAACAGGTATATTCTGCTGCATGTACTGTACTCCAGAGCTGTTATGTAACACTGTATAT";"A_23_P111811";"ING3";"NM_019071";"ref|Homo sapiens inhibitor of growth family	member 3 (ING3)	transcript variant 1	mRNA [NM_019071]";9	79914434906296;0	540736347233672;10	5307247473228;2	66725663813207e-06;2	84495587056977e-05;1	4.44086e+07
786;5;130;1621;"ACATTCCTCAGCAGGATCAAGCCAAACAGTAAAAACTACCAAGAGAACACGAGGAAGGCA";"A_23_P105313";"EIF2B1";"NM_001414";"ref|Homo sapiens eukaryotic translation initiation factor 2B	subunit 1 alpha	26kDa (EIF2B1)	mRNA [NM_001414]";12	7203380398558;0	338491891872243;7	54008095142616;3	89637061251521e-05;0	000252436493478437;9	2.67168e+08
788;5;132;3500;"ATCCCACTGTCTTCTTTGCATCTGGCACACAGTAGATGCTCAATAAATGCCTGTGGAATG";"A_33_P3323323";"ZNF497";"NM_198458";"ref|Homo sapiens zinc finger protein 497 (ZNF497)	mRNA [NM_198458]";7	87466792944998;-0	396834666598159;-6	09796399300464;0	000193088990729282;0	000940600018417848;0	34530263659367
789;5;133;1333;"AAGTCGATAATGAGGAACACACCCTTGTTCCCGTCATTCACGTATAAAGAGTGGCTACCT";"A_23_P166526";"RIBC2";"NM_015653";"ref|Homo sapiens RIB43A domain with coiled-coils 2 (RIBC2)	mRNA [NM_015653]";7	79417687876776;-1	48162806679065;-13	3188238953234;3	74042549888508e-07;6	12037960765161e-06;2	2.46846e+07
792;5;136;844;"TATGGGTGACAGCACTCCTGAGCGTCGCTGTCCCTATTCGCTGCCGTTGCCAGCTCCGAT";"A_24_P202329";"LOC146880";"NR_026899";"ref|Homo sapiens Rho GTPase activating protein 27 pseudogene (LOC146880)	non-coding RNA [NR_026899]";6	18427858163116;0	215638126053654;2	12553397153136;0	0630059496161979;0	128235497985532;0	470763924008725
793;5;137;2473;"TCCTTCTGTTTCTAGGTTTAGAAGTTCAGAGGTGACTGTGTTTCTCCATTTCCACAGCCA";"A_24_P97825";"CCDC69";"NM_015621";"ref|Homo sapiens coiled-coil domain containing 69 (CCDC69)	mRNA [NM_015621]";8	57257508661566;0	922377082875856;9	91732336542544;4	36721524848014e-06;4	23176713929813e-05;1	5.53519e+08
797;5;141;407;"TCTGGGATGACTTAAATAAGTCATCAGCCACCCTGCTGAGCTGTGACAACCGTAAGGTCA";"A_23_P330537";"SPSB3";"NM_080861";"ref|Homo sapiens splA/ryanodine receptor domain and SOCS box containing 3 (SPSB3)	mRNA [NM_080861]";6	85716854945772;0	559812249006428;4	25856549891425;0	0022015082531884;0	00746439106391347;0	274024438067845
799;5;143;376;"ACACACGCTCTGCACCCCTAAGACCATCTTCCTGCAGTGCCTGCCCTGGAGGAAGGTGAG";"A_21_P0011106";"LOC100507055";"BX379759";"gb|BX379759 Homo sapiens PLACENTA COT 25-NORMALIZED Homo sapiens cDNA clone CS0DI039YM08 5-PRIME	mRNA sequence [BX379759]";7	83174905382678;-0	0634081179471213;-0	512251272194401;0	621021574576693;0	729014492024878;0	267627707082776
800;5;144;2013;"TGCTCAGGAATCTAACTCTCCCTAAACCATCCTCTTTAACTGCTTCTAAAATATCTCTGT";"A_23_P135326";"POLE3";"NM_017443";"ref|Homo sapiens polymerase (DNA directed)	epsilon 3 (p17 subunit) (POLE3)	mRNA [NM_017443]";12	9557137339072;-0	323521926232756;-4	83179750013836;0	000979181739022241;0	00373651943101337;0	137170953215868
803;5;147;1469;"TACCACCAAAGTAGTTCTCTGTCATGTGTGTTCCCTGCCTGCACAAACCTACATGTACAT";"A_23_P63825";"GOT1";"NM_002079";"ref|Homo sapiens glutamic-oxaloacetic transaminase 1	soluble (aspartate aminotransferase 1) (GOT1)	mRNA [NM_002079]";12	0403469830259;-0	0478527518432124;-0	796201184532697;0	446759893912577;0	578703594014682;0	212447238897174
804;5;148;3106;"AATGGGATTTGCATGTTCCTGTCAAGCGTAACAACAATCCCTTCTCTCTTTGACAGAGGC";"A_33_P3274478";"UNC119B";"NM_001080533";"ref|Homo sapiens unc-119 homolog B (C. elegans) (UNC119B)	mRNA [NM_001080533]";6	3357347518571;0	439283911039961;3	7993055067147;0	00435896281550493;0	0133604556055766;0	490474213944661
806;5;150;73;"ATTTATGCATGGAGGCTGCTTCTCCTCAGCAGCTGCCATAGCCCGGTCGCTGGTACATGA";"A_21_P0000473";"SNORA84";"NR_003704";"ref|Homo sapiens small nucleolar RNA	H/ACA box 84 (SNORA84)	small nucleolar RNA [NR_003704]";8	75356335635861;0	381221520814254;6	49191765314336;0	000121703302933477;0	000642245373630584;0	235773991614159
808;5;152;527;"TCACTACCTGCTGGAGAGATGGAAAATTATTTAATGCCATCATTCATAAATACAGGTATG";"A_21_P0014003";"LOC100652766";"ENST00000521821";"ref|PREDICTED: Homo sapiens dystonin-like (LOC100652766)	mRNA [XM_003403438]";10	4929718523883;0	252122420553688;3	92847506938343;0	00358640952768888;0	0113381136261939;0	416232240321323
810;5;154;245;"TTCCTGGTGAGAATCCCTTGAGCACCTGCACTTCTAGGTGGAACTTCCTGGTGCACCTGC";"A_19_P00320144";"XLOC_003428";"ENST00000502775";"linc|BROAD Institute lincRNA (XLOC_003428)	lincRNA [TCONS_00007379]";5	65123734889532;-0	114314225330073;-0	988932242299874;0	348979200555328;0	483974774774628;0	177671446419499
812;5;156;3494;"TTGTTTAAGTCTATTTCAGTGAAAGAGAACAAGCATACTGCCCATACTCTAAAATATCCC";"A_24_P72394";"RBAK";"NM_021163";"ref|Homo sapiens RB-associated KRAB zinc finger (RBAK)	transcript variant 1	mRNA [NM_021163]";6	21106064001809;-0	0217237809688076;-0	200474970920978;0	845643408299039;0	897907380114364;0	329629789176412
813;5;157;1175;"GACGTCACCAAAATTAACAAAACTGAGATATGTTCCCAGTTGTAGAATTACTGTTTACAC";"A_23_P31453";"STEAP1";"NM_012449";"ref|Homo sapiens six transmembrane epithelial antigen of the prostate 1 (STEAP1)	mRNA [NM_012449]";10	9729592872892;0	659837209424289;8	2108906850298;1	99783371508423e-05;0	00014644712745196;5	3.76204e+07
814;5;158;5349;"TAACCATTTAGAAGCTGCTATTCATGAGGCCATGAGTGAACTGGACAAAATGTCTGGGAC";"A_33_P3854030";"MBD5";"NM_018328";"ref|Homo sapiens methyl-CpG binding domain protein 5 (MBD5)	mRNA [NM_018328]";7	39840823252578;0	192604323046789;2	11088826023796;0	0645134919899134;0	130692110307549;0	479782366441968
815;5;159;756;"GAAGTATTCAAGTCTAACAGTGTTGAAATGGATTGGGTGTTGAAGCATACAGGTCCGAAT";"A_33_P3255647";"RPL36A-HNRNPH2";"NM_001199973";"ref|Homo sapiens RPL36A-HNRNPH2 readthrough (RPL36A-HNRNPH2)	transcript variant 1	mRNA [NM_001199973]";9	11940947728792;-0	0662361145995618;-0	902101085046535;0	390909967798237;0	525744253928502;0	193005393898299
817;5;161;191;"AGAACTTGGGATTTCATTTATGTCCAATGTGAGTCAGGCATCTCTCCTGGTGGCTGTCTT";"A_21_P0005611";"XLOC_006625";"TCONS_00014425";"linc|BROAD Institute lincRNA (XLOC_006625)	lincRNA [TCONS_00014425]";6	35147422095629;-0	956016478176525;-1	56425739571768;0	152789685749079;0	259446577352402;0	952451472047387
822;6;2;1699;"AATGATGCTATGTGTAGCATCTTGCTGTAAATCCTGTACAATGATTCTGTGTAAATAGCT";"A_24_P88554";"PEX11B";"NM_003846";"ref|Homo sapiens peroxisomal biogenesis factor 11 beta (PEX11B)	transcript variant 1	mRNA [NM_003846]";10	1396911304613;0	252755669300438;4	22849009197026;0	0023001313167521;0	00774573312820036;0	284352755597157
823;6;3;1787;"GGAGGGAATTTCACATTCCCTTGTTCTAGATTCACTTTAACGCTTAATGCCTTCAAAGTT";"A_23_P119102";"VASP";"NM_003370";"ref|Homo sapiens vasodilator-stimulated phosphoprotein (VASP)	mRNA [NM_003370]";11	1501189821686;0	475163216972506;9	0232821470272;9	40513415602544e-06;7	93959121565841e-05;2	9.14695e+08
824;6;4;439;"GTTTCTTTGCCCTTATCCCCAAACATGGACACCTGACTCTCCAGGTAGAACTAATTTGAG";"A_19_P00319946";"XLOC_003677";"TCONS_00008880";"linc|BROAD Institute lincRNA (XLOC_003677)	lincRNA [TCONS_00008880]";7	03081673439811;-0	0346085278993753;-0	107256129095059;0	916979479423716;0	946813824291061;0	347583780022639
825;6;5;3989;"AACGCTTGGTTATTGGGAGATGCCCCTCGGACCCTTACAAACACTCGTTGCCATCCCAGG";"A_33_P3334895";"GRIN2A";"NM_001134408";"ref|Homo sapiens glutamate receptor	ionotropic	N-methyl D-aspartate 2A (GRIN2A)	transcript variant 3	mRNA [NM_001134408]";7	15365417214255;0	235242020598967;1	01912726360717;0	335210622343183;0	469871002025208;0	172493825942217
826;6;6;1252;"GTACCATCCCATCCCCTTCAGCTGGAACAAGAAACCAAAGGAAGAAAAGTTCTCTATGGT";"A_23_P205529";"METTL17";"NM_022734";"ref|Homo sapiens methyltransferase like 17 (METTL17)	transcript variant 2	mRNA [NM_022734]";10	8934879517877;0	541702885906382;8	48230940153808;1	54330202616211e-05;0	000118330853471281;4	3.44031e+07
827;6;7;828;"TTCTCCAGATTGGCAGAAAGTTGATATAGGTGGACTTTTTTACAGGTCAGTTGAGGCAAA";"A_23_P123905";"EXOSC3";"NM_016042";"ref|Homo sapiens exosome component 3 (EXOSC3)	transcript variant 1	mRNA [NM_016042]";11	6994738842324;-0	289651489194126;-4	533421458935;0	00148394424172881;0	00533080215436851;0	195698490646312
829;6;9;2630;"TCTACTCTGAGTGGGGCTAAATAAGTTATTTTCTCTGACCGCCTACTGGAAATATTTTTA";"A_23_P44768";"TBK1";"NM_013254";"ref|Homo sapiens TANK-binding kinase 1 (TBK1)	mRNA [NM_013254]";9	98102298667564;-0	189247819503171;-3	04913173127158;0	0140923885440775;0	0364397801003144;0	133773675304591
830;6;10;160;"TTTGATCACCTGGCATTTTTGTTGGGTTGTTTTTGGCCTTCCTTTAAAGGACGCTGCGCT";"A_21_P0001657";"XLOC_000022";"TCONS_00001917";"linc|BROAD Institute lincRNA (XLOC_000022)	lincRNA [TCONS_00001917]";6	06997791376989;-0	0841164783394408;-0	349847609043236;0	734639752226746;0	81796094480163;0	300280741377979
831;6;11;0;"TCACTTCGTGCTAGCATATGGGCAATCTCAATTTATTTCTAATAACTCCCTGTATCTTTC";"A_33_P3249837";"A_33_P3249837";"A_33_P3249837";"Unknown";6	2572925798824;-0	281891605709485;-1	68642237548061;0	126587401957045;0	223997336884156;0	82231415587427
832;6;12;1957;"CGTTCCAGTGCCAAAAATGCGACCGAGCATTTTCCAGGTCGGACCACCTCGCCTTACACA";"A_23_P32233";"KLF4";"NM_004235";"ref|Homo sapiens Kruppel-like factor 4 (gut) (KLF4)	mRNA [NM_004235]";8	26744462424821;-0	25193132018903;-2	86975981460368;0	0188103169800373;0	0466812678659367;0	171371088220441
834;6;14;5453;"TACAGGATCTAAAAGGGTTTTCTTAGAAAGGGCAATATTGTCCAATGAAGTAAGCAGAAG";"A_24_P915692";"PHLDA1";"NM_007350";"ref|Homo sapiens pleckstrin homology-like domain	family A	member 1 (PHLDA1)	mRNA [NM_007350]";11	5821798059338;0	935443563715129;15	1392679573971;1	25801716073366e-07;2	69347919044639e-06;9	8.88002e+06
835;6;15;3245;"CCGGCCATTGATGTGTTGTCATTGAATCCAGGAGGATTTCTAGGGCACTGAAGTTTTGTT";"A_23_P501435";"CSRP2BP";"NM_020536";"ref|Homo sapiens CSRP2 binding protein (CSRP2BP)	transcript variant 1	mRNA [NM_020536]";11	1371007132683;0	0582504438693867;1	02180580717262;0	3340093505976;0	468626652521397;0	172037014166652
838;6;18;2980;"AGGGTGGACCAAAGCACCCCCTCTTTTCCTGGGCTTCCCGAGAGTTGATAATTGAAAAAA";"A_33_P3347040";"LOC100131094";"NM_001242901";"ref|Homo sapiens uncharacterized LOC100131094 (LOC100131094)	mRNA [NM_001242901]";11	2427566999607;0	956212233013394;7	75109605751853;3	14285630152776e-05;0	000211495432419831;7	7.64186e+08
839;6;19;1139;"ATAAAGAGGACCCTTCCTCTCATTGGCTCTTTTTCTGCTCACGGGAACTTAGCAGAAACT";"A_33_P3265309";"CEACAM4";"NM_001817";"ref|Homo sapiens carcinoembryonic antigen-related cell adhesion molecule 4 (CEACAM4)	mRNA [NM_001817]";6	89251852933544;-0	2605645541804;-0	880725680366318;0	401766404784762;0	536310735718822;0	196884443388276
841;6;21;976;"AGCACAGAGTGCCTCTTACGGTAGTTAGGATGCTCAGTTGCTAAACACTGCGCTTTATTT";"A_23_P28105";"TSN";"NM_004622";"ref|Homo sapiens translin (TSN)	mRNA [NM_004622]";9	94524350199299;-0	279396117756672;-4	12128234912023;0	00269186329986;0	00888344146472055;0	32611904100887
842;6;22;36;"CTCCTGTCACCACAACAACTAGTGTGTGGAGCACAACTAGCCTGACCCTCTAGCATGGCT";"A_21_P0001141";"XLOC_000869";"ENST00000423187";"gb|AGENCOURT_10399168 NIH_MGC_82 Homo sapiens cDNA clone IMAGE:6614712 5'	mRNA sequence [BU567955]";6	28418617621972;-0	3454979657224;-0	856699891526693;0	414221002484379;0	548474275662865;0	201349787137743
844;6;24;351;"TGTAACTTCCTTATGCTGAGTCGGCCCAGTAGTCTAGGTCAAGTTTCAATAGGAGACGAA";"A_33_P3839897";"RNU4ATAC";"DW419002";"gb|HHAGE001732 Human liver regeneration after partial hepatectomy Homo sapiens cDNA	mRNA sequence [DW419002]";7	67896276852825;0	387314942069185;2	24405447243243;0	0520040352900599;0	109686691724069;0	402669605676457
845;6;25;12;"AAGCCTGTGTTGGTAGGGACATCTGACAGTAATGATGAATGCCAACCGCTCTGATGGTGG";"A_21_P0000264";"SNORD74";"NR_002579";"ref|Homo sapiens small nucleolar RNA	C/D box 74 (SNORD74)	small nucleolar RNA [NR_002579]";7	62242215023519;0	158584103697822;1	61230356152808;0	141950625119796;0	245089125247077;0	899743987785639
846;6;26;2987;"GAAGTAAGTTCTGAAAACTGTTTATGGTATTTTCGTGCATTTGTGAGCCAAAGAGAAAAG";"A_23_P374689";"GAD1";"NM_000817";"ref|Homo sapiens glutamate decarboxylase 1 (brain	67kDa) (GAD1)	transcript variant GAD67	mRNA [NM_000817]";7	77503223602271;-0	0386830129260778;-0	521593256361421;0	614762661280638;0	724123808199522;0	265832293531241
847;6;27;0;"GCCTAGTAAGCTGAGAGCTCCTAATTGGGTGACACCACATCCTCTGCCTGCTCATAGCCG";"A_33_P3328289";"A_33_P3328289";"A_33_P3328289";"Unknown";6	73036601168394;-0	232773299680646;-0	744117911063903;0	4761102448204;0	60589345032311;0	222428877094136
848;6;28;3151;"TGGCTCCCAGTCGGGTATCAGTGCAGATGTGGAAAAACCAAGTGCTACTGACGGCGTTCC";"A_23_P109072";"SALL4";"NM_020436";"ref|Homo sapiens sal-like 4 (Drosophila) (SALL4)	mRNA [NM_020436]";6	27381979174017;-1	08205997652782;-2	03825441818807;0	0725199004198485;0	143824133829084;0	527991193329126
850;6;30;2168;"CTGTGACCAGCACTGTCTCAGTTTCACTTTCACATAGATGTCCCTTTCTTGGCCAGTTAT";"A_23_P24104";"PLAU";"NM_002658";"ref|Homo sapiens plasminogen activator	urokinase (PLAU)	transcript variant 1	mRNA [NM_002658]";15	2411259008555;-1	04255462056426;-20	0984441577603;1	09559534428179e-08;4	61428977747306e-07;1	6.93947e+06
851;6;31;270;"ACAGATAAAGGAGAAGTCCCCGATGGCTATGTTGTCTCCAGATCCAAGACAGAGAATTTC";"A_33_P3264569";"ENST00000426318";"ENST00000426318";"ens|T cell receptor beta variable 10-2 [Source:HGNC Symbol;Acc:12178] [ENST00000426318]";5	75119000953529;0	0265851369034884;0	223158734878366;0	828481024496724;0	88608479687266;0	325289613666342
855;6;35;1260;"ACTTGGTAAAGGTTCAGCTGTGAACTGAACAGTCACTAATCCTGTGGCAGCTGAAAATCC";"A_21_P0010038";"XLOC_013743";"TCONS_00028388";"linc|BROAD Institute lincRNA (XLOC_013743)	lincRNA [TCONS_00028388]";5	8039015422842;0	621987650318825;3	48350287103173;0	00708761899881152;0	0202591341994168;0	743730843842695
857;6;37;3403;"AAGCAGAGGCAGTCTATTGCAAGGGACCTTCTTTGCTGCCAGTTATCATAGGCTGTTTTA";"A_23_P104892";"EIF4G2";"NM_001418";"ref|Homo sapiens eukaryotic translation initiation factor 4 gamma	2 (EIF4G2)	transcript variant 1	mRNA [NM_001418]";14	6386982175101;-0	0178300763167023;-0	342360540117432;0	740075275550159;0	822050407897694;0	301782019670211
859;6;39;0;"TCCAAGTGGCCCCACACAGCAAGGTGTTTTTGACATCCACGTGGTGGCAAAACCAACTAT";"A_33_P3283646";"A_33_P3283646";"A_33_P3283646";"Unknown";5	93824079295274;0	044172270792715;0	354102702926922;0	731557542608125;0	815742808868272;0	299466443938989
861;6;41;1886;"TACATGCCAGTGACACTTCCAGTCCCCTTTGTATTCCTTAAATAAACTCAATGAGCTCTT";"A_23_P113572";"CD19";"NM_001770";"ref|Homo sapiens CD19 molecule (CD19)	transcript variant 2	mRNA [NM_001770]";6	6518940256235;0	0704333115561795;0	713095154418381;0	49417182830748;0	621699418856668;0	22823138879059
862;6;42;4431;"CTAATTTTTGGTGCTGATACTGTATTGTGCAAATCCACTGAATATGTTACTTAGTTCCAG";"A_33_P3289422";"ZNF765";"NM_001040185";"ref|Homo sapiens zinc finger protein 765 (ZNF765)	mRNA [NM_001040185]";10	5980514774662;-0	597960976797987;-6	54814134380988;0	000114123304818528;0	000607927155944417;0	223175468524438
863;6;43;178;"GCATACAGAGCAGTAATTAAAATCCTCTCTTTCCCTCTGCCTTTAGGGCAGGGGATGATT";"A_21_P0001338";"XLOC_000293";"BX108687";"gb|BX108687 NCI_CGAP_Lu5 Homo sapiens cDNA clone IMAGp998I184654	mRNA sequence [BX108687]";6	50306312323954;0	183185248645753;1	74443294173981;0	115640026533139;0	208347575938436;0	764862490864657
865;6;45;2868;"AAGGGATGTGAGTTGCTTAAATGTGACATTGAGACTTTCATAATGAAAGCTTTTGGTTAC";"A_24_P500422";"LOC730101";"NR_024403";"ref|Homo sapiens uncharacterized LOC730101 (LOC730101)	transcript variant 1	non-coding RNA [NR_024403]";8	01601722021101;0	208237959668982;1	47041525494965;0	176109024197655;0	289807639922298;0	106390963438939
866;6;46;769;"TTTGCTGGAGGAAACATTGCTTCTGAACCAGCCAACCTTCTGCTCCTGAAGAATATCTCT";"A_33_P3277328";"LOC730102";"NR_037167";"ref|Homo sapiens quinone oxidoreductase-like protein 2 pseudogene (LOC730102)	non-coding RNA [NR_037167]";6	72220258567322;-0	37042737685552;-0	618885733790212;0	551597525715898;0	671757056226134;0	246607992901656
867;6;47;2749;"AACATTCTTCATTTAGAACACCACCGCCAATATCTACCATATGCCGGGATTATTGTGCAG";"A_21_P0013205";"XLOC_l2_013427";"TCONS_l2_00025910";"linc|BROAD Institute lincRNA (XLOC_l2_013427)	lincRNA [TCONS_l2_00025910]";6	02442977708171;0	301886250488836;0	647092212350849;0	534005469230833;0	656755699188192;0	241100861244996
869;6;49;957;"GAACAAGCAAGATTAGACATACTGAAAATCCATGCAGGTCCCATTACAAAGCATGGTGAA";"A_23_P128930";"PSMC6";"NM_002806";"ref|Homo sapiens proteasome (prosome	macropain) 26S subunit	ATPase	6 (PSMC6)	mRNA [NM_002806]";12	7433192361689;-0	0540639509914129;-1	08237048457168;0	307715283214298;0	441395997763935;0	162040398496008
870;6;50;273;"TCAGGAAGTTACTGGGATTACATTCATTGCACACAAAATGGGTGGTCACCAGCAGTACCA";"A_23_P103256";"CFHR3";"NM_021023";"ref|Homo sapiens complement factor H-related 3 (CFHR3)	transcript variant 1	mRNA [NM_021023]";6	3891263128183;1	99132632621745;31	8432182661482;1	97151605983769e-10;2	57290384707184e-08;9	44535.9
872;6;52;195;"CACTAAATTTAAAATGACACTTTTTTACCAACCAGCGAAAGCAGATGTTCAAAGGGGATA";"A_21_P0007250";"LOC100506233";"NR_038903";"ref|Homo sapiens uncharacterized LOC100506233 (LOC100506233)	non-coding RNA [NR_038903]";9	97552769884912;-0	307206064746412;-3	90134468434729;0	00373571147750851;0	0117271676271802;0	430514758893227
873;6;53;2119;"ACTTACTGAATGTGACATATTTATTCCTAGTTCCATACCTTTGCACATGCCCTACTCTCC";"A_23_P65466";"RAB2B";"NM_032846";"ref|Homo sapiens RAB2B	member RAS oncogene family (RAB2B)	transcript variant 1	mRNA [NM_032846]";7	78740112985153;1	03734955237718;15	7635566473506;8	90271197940266e-08;2	07600921374766e-06;7	6.21215e+06
874;6;54;2881;"AAGAAAAGCGGGCTTGTTGTGGAAGATCACCTTTTTGATACCCTGCCACTCGAAGTCAAA";"A_23_P97365";"LRRC8D";"NM_018103";"ref|Homo sapiens leucine rich repeat containing 8 family	member D (LRRC8D)	transcript variant 2	mRNA [NM_018103]";10	4895907301508;-0	253245595796027;-3	86561625833359;0	00394245695243449;0	0122660992680404;0	450299418991981
876;6;56;835;"TGAGCCAAGCACAGTGGTGGCAAAAGCTTATTTGTGTACAATCACTGGCTTCATACTTCC";"A_23_P111297";"RPP40";"NM_006638";"ref|Homo sapiens ribonuclease P/MRP 40kDa subunit (RPP40)	mRNA [NM_006638]";10	549113929907;0	715736590428289;13	7321745892757;2	88703859413656e-07;5	02188659239538e-06;1	8.43579e+07
878;6;58;4757;"TGTGAGGCGATTATTTTAAGTAATTATCTTACCAAGCCCAAGACTGGTTTTAAAGTTACC";"A_23_P118834";"TOP2A";"NM_001067";"ref|Homo sapiens topoisomerase (DNA) II alpha 170kDa (TOP2A)	mRNA [NM_001067]";12	5165810924449;0	406802525667079;5	69693944236696;0	000315299312964373;0	00142644902167771;0	523662128967726
879;6;59;2127;"AAATGGATGGGTCAGTGCATTCAGAAATGGAATTCAGTGGAAATGATACCAAAGATAATC";"A_24_P358054";"CTAGE10P";"NR_003268";"ref|Homo sapiens CTAGE family	member 10	pseudogene (CTAGE10P)	non-coding RNA [NR_003268]";6	05344864087869;-0	64336416061675;-1	5588056790096;0	154065277582047;0	261004228841276;0	958169749269059
881;6;61;176;"AACAAACAATGGTCCAAGTCTAACAGGATTGACTACTATAGCAGCTCATCTAGTCAAGCA";"A_21_P0011842";"EEF1E1";"NM_001135650";"ref|Homo sapiens eukaryotic translation elongation factor 1 epsilon 1 (EEF1E1)	transcript variant 2	mRNA [NM_001135650]";12	8502898986198;-0	0817804856663678;-1	3862145249377;0	199630351795909;0	319352988705128;0	117237323883362
882;6;62;3636;"CTGGCAGCTGAAACTGCACACAACTGATACACATATTTAATTTGTATTCCTTTGTAGTAA";"A_33_P3331601";"THNSL1";"NM_024838";"ref|Homo sapiens threonine synthase-like 1 (S. cerevisiae) (THNSL1)	mRNA [NM_024838]";7	2152907918745;0	497139522731908;4	85901292873663;0	000943354316790749;0	00361739059989589;0	132797627819981
883;6;63;143;"CAGACCCCTCTTAGCAGAATACTTCCATGAGGTAATAAAAGGTTTAATTTATTTCAGAAG";"A_21_P0011632";"XLOC_l2_005997";"ENST00000433051";"linc|BROAD Institute lincRNA (XLOC_l2_005997)	lincRNA [TCONS_l2_00011622]";6	24453970800043;0	0688177352995805;0	478348200862545;0	644005580700082;0	746975907833356;0	274221502653879
885;6;65;679;"TCAGGATTATGGGGTCTTAAAGGCTGATGAAGGCATCTCGTTCAGGGGCCTTTTTATCAT";"A_23_P11995";"PRDX1";"NM_002574";"ref|Homo sapiens peroxiredoxin 1 (PRDX1)	transcript variant 1	mRNA [NM_002574]";15	453656281697;-0	224246864374054;-4	78133835402522;0	00104954599640403;0	00396273497175661;0	145475527012124
888;6;68;1998;"GCCACTTACCTACTGAACTGCTACTGTTGCCTGAGAAAAATGTGATTTTTATTCTGCTTG";"A_23_P113825";"NACC2";"NM_144653";"ref|Homo sapiens NACC family member 2	BEN and BTB (POZ) domain containing (NACC2)	mRNA [NM_144653]";10	1557310034727;0	369085430492227;7	26139747154256;5	2119982994768e-05;0	000319214329548103;0	117186420872974
889;6;69;421;"ACAGAGGGTTGATACTGTATAGGCTGGGATATTTTGATGATGCTTTGGAAGATTTCAAGA";"A_23_P119857";"TTC32";"NM_001008237";"ref|Homo sapiens tetratricopeptide repeat domain 32 (TTC32)	mRNA [NM_001008237]";10	5596728225383;0	354121346086391;7	228697205543;5	39591802534595e-05;0	000328181141666288;0	120478217391814
890;6;70;2632;"TAAAATTATCCTGTATTTTTAATGATTATTTATTAAATTCCTCTCATTAGAGCCTGTTAT";"A_21_P0010493";"LOC389831";"AK123495";"tc|Q86U02_HUMAN (Q86U02) Full-length cDNA clone CS0DI010YI19 of Placenta of Homo sapiens (human)	partial (26%) [THC2501093]";8	23700721636162;0	018002958776842;0	285118408336462;0	782117749970298;0	852910949000108;0	313111198918257
891;6;71;2537;"AGCTTCGTATTTTTCTTGGTTTCACACTCAGCTACATGTGACCTCCAGCTTGGTGAGGTT";"A_23_P201672";"METTL13";"NM_015935";"ref|Homo sapiens methyltransferase like 13 (METTL13)	transcript variant 1	mRNA [NM_015935]";12	8253935129934;-0	0768431848782658;-1	11598756641454;0	293830655518861;0	426824570219451;0	156691097782079
892;6;72;1672;"ACTTGCTGGAGGCCACATGGCTGTGAGCCAAATACAGGTCTGGGTTATCAGGGCTCACAT";"A_24_P305038";"C17orf69";"NR_026905";"ref|Homo sapiens chromosome 17 open reading frame 69 (C17orf69)	transcript variant 1	non-coding RNA [NR_026905]";6	65814568120016;-0	340197387598892;-2	99938662130878;0	0152637573886288;0	0390079187393643;0	143201540771717
894;6;74;3275;"TTTAGAACTAAGCCTATTTGAAACGGTCGGTGTAGGCTTACTGAGATCAGGAGACAGGGA";"A_33_P3224819";"SLC45A4";"NM_001080431";"ref|Homo sapiens solute carrier family 45	member 4 (SLC45A4)	mRNA [NM_001080431]";8	31195252410757;0	555808247243199;1	75444629882532;0	113841072638979;0	205971309879813;0	756139006713863
895;6;75;1643;"ATCATTATGTCTGCCTTGGCTGTACATGTGATCTTGGTGGCATTTCTGGACTATCACCCA";"A_21_P0009428";"LOC100505853";"XR_110155";"ref|PREDICTED: Homo sapiens hypothetical LOC100505853 (LOC100505853)	miscRNA [XR_110155]";6	12055503622306;0	219943174509877;0	904067062416986;0	389922069820213;0	524986076181518;0	192727060100814
896;6;76;2863;"AGGTTAGTCTTTCAGTACACGTTACTGGTAAGTAGTTTCCAAGTTACGTGTTGTCACTGG";"A_23_P122976";"GNAI1";"NM_002069";"ref|Homo sapiens guanine nucleotide binding protein (G protein)	alpha inhibiting activity polypeptide 1 (GNAI1)	mRNA [NM_002069]";8	51381787195348;-0	139690525184088;-2	80589989360913;0	0208577674479208;0	0509955140916343;0	187209070013738
897;6;77;489;"AAGACTTTTGCTAGGAAAGCTGAGACATCCTCTCAATTTTCCCTCCTGGACAAGATCGAG";"A_33_P3415156";"DA938875";"DA938875";"gb|DA938875 SPLEN2 Homo sapiens cDNA clone SPLEN2012237 5'	mRNA sequence [DA938875]";6	82632847974934;0	200710886747344;0	846321636326825;0	419683320989126;0	553591132539354;0	203228230828926
904;6;84;1203;"CTTGGATTTCCAGAAAAGCCTCTTAATTTTATGCTTTCTCATCGAAGTAATGTACCCTTT";"A_33_P3410724";"SDHC";"NM_003001";"ref|Homo sapiens succinate dehydrogenase complex	subunit C	integral membrane protein	15kDa (SDHC)	nuclear gene encoding mitochondrial protein	transcript variant 1	mRNA [NM_003001]";13	300769137231;0	221284055763498;2	26588744915967;0	0501932297457257;0	106509603245463;0	391006231161545
905;6;85;2245;"TTTCAAATGACCAATCAAGTACTACTTCTTGGTTAAAAGGCCACTGGTAGAGTCATCTGA";"A_24_P276932";"ATP6V1C2";"NM_001039362";"ref|Homo sapiens ATPase	H+ transporting	lysosomal 42kDa	V1 subunit C2 (ATP6V1C2)	transcript variant 1	mRNA [NM_001039362]";7	48081045588341;-0	157307724079365;-1	77698559299533;0	109886089767096;0	200347556300576;0	735493706900558
907;6;87;2618;"AGAAAGCAGTTCTGATGCTTACATCTGGAATCTGAGGCATCCTCTGACTCCACTCAAAGA";"A_21_P0011001";"PCSK7";"NM_004716";"ref|Homo sapiens proprotein convertase subtilisin/kexin type 7 (PCSK7)	mRNA [NM_004716]";7	91494899133452;0	0643714717476866;0	672766463013727;0	518286338192808;0	642659982934557;0	235926198379006
909;6;89;605;"GGCAGCCTGTCTGACCTCATCTATGCCTTGGCCATTGTCGTCAATGTGGACCACTCCTAG";"A_33_P3309506";"SEBOX";"NM_001080837";"ref|Homo sapiens SEBOX homeobox (SEBOX)	mRNA [NM_001080837]";6	48644993998584;-0	0334816158184985;-0	187578577370003;0	855439983353805;0	904554509222726;0	332070009420886
910;6;90;2134;"CGGCCACCGCCTCTTTTGTTAACAGGACAGTTGATCCATTAAATTAAAAATCATTCAATA";"A_21_P0014358";"LOC100507520";"XR_109439";"ref|PREDICTED: Homo sapiens hypothetical LOC100507520	transcript variant 1 (LOC100507520)	miscRNA [XR_109439]";8	63281283196422;0	371379130280776;4	42134167840352;0	00174058746232704;0	00608764438198603;0	22348284229042
911;6;91;340;"TAAAACCAAACAACTTGGAACCGCTCCAAGAGAGGGGATTAAAGCAACATGTTATTCTGA";"A_21_P0014319";"LOC100129781";"XR_109258";"ref|PREDICTED: Homo sapiens hypothetical LOC100129781	transcript variant 1 (LOC100129781)	miscRNA [XR_109258]";6	9178397972624;-0	0343862658542946;-0	0635530361121595;0	950739359983828;0	96910968021158;0	355768787128441
912;6;92;1273;"AGTAAGGAGAAACCACCAATGCCGAGAGGCTAGTGGTGCCCCAGGGACCCAAGACTAGTT";"A_33_P3306413";"INCA1";"NM_001167986";"ref|Homo sapiens inhibitor of CDK	cyclin A1 interacting protein 1 (INCA1)	transcript variant 1	mRNA [NM_001167986]";6	26769945608435;0	824337602885791;1	34646342119996;0	211643899712537;0	33421830860484;0	122694515096066
913;6;93;1815;"ATAGAAGCTTCTAAGCAGAAGAGGGACTTGCCCTAATTCAGGTGATCACAGGTGTCTTGT";"A_23_P107744";"S1PR5";"NM_030760";"ref|Homo sapiens sphingosine-1-phosphate receptor 5 (S1PR5)	transcript variant 1	mRNA [NM_030760]";6	34861874924117;1	87855141852442;34	6649775134942;9	35514782799992e-11;1	57617097960753e-08;5	786.264
914;6;94;405;"CCGCGGGGAGGACCGTCCATCCCCTTCCCCCGGCCCCTCTCAATAAACGTGGTTAAGAGC";"A_33_P3210379";"SCGB3A1";"NM_052863";"ref|Homo sapiens secretoglobin	family 3A	member 1 (SCGB3A1)	mRNA [NM_052863]";12	9638455546636;0	179692423718361;2	1948120355295;0	0563264093312044;0	117061731611867;0	429744033364899
915;6;95;3935;"TGGGGGTCCCTGTGGGTCAAATTGGGGGGAGGTGCTGTGGGAGTAAAAAACTGAATATAT";"A_23_P110851";"TERT";"NM_198253";"ref|Homo sapiens telomerase reverse transcriptase (TERT)	transcript variant 1	mRNA [NM_198253]";8	63971072955888;-0	800176292568896;-14	6698744391122;1	64606797517627e-07;3	29213595035255e-06;1	2.08572e+07
916;6;96;654;"TCCAGGTTTGCAGCCCGCAAGATTTAAGATGGGGCCATGAGGTTAAATCTTGTAAACTCA";"A_21_P0014351";"LOC100506325";"ENST00000451140";"ref|PREDICTED: Homo sapiens hypothetical LOC100506325 (LOC100506325)	miscRNA [XR_109396]";6	80550138222865;-0	000894918376806331;-0	00559933399532541;0	995656669659371;0	997034045153144;0	366020069980577
917;6;97;1340;"AGCTGATAGTGTTTCGTTAAGCAGTACATCTTGTGCATGCAAAAATGAATTCACCCCTCC";"A_23_P103070";"YWHAH";"NM_003405";"ref|Homo sapiens tyrosine 3-monooxygenase/tryptophan 5-monooxygenase activation protein	eta polypeptide (YWHAH)	mRNA [NM_003405]";11	7448522613204;-0	109628406877547;-2	27633929976703;0	0493484307334332;0	105014713728467;0	385518358723446
918;6;98;2343;"ACTGAGGTCAAACGTTGTTTCCTTAGGTTGAAATAGCAGCCAAAACATTCTTCACGCAGG";"A_23_P250283";"RAB1A";"NM_004161";"ref|Homo sapiens RAB1A	member RAS oncogene family (RAB1A)	transcript variant 1	mRNA [NM_004161]";10	6119219383995;0	748433471549054;2	87517037539174;0	0186465770196115;0	0463499805724624;0	170154903086838
919;6;99;243;"TAGGAATTCTAGTGACTATGTTGCCACCATCTTGGAGCTCCATGCCCTCATAGTGTAATG";"A_21_P0014228";"LOC100289137";"ENST00000433357";"ref|PREDICTED: Homo sapiens hypothetical LOC100289137 (LOC100289137)	miscRNA [XR_108946]";7	5266100786239;0	358514933363341;1	89651628294201;0	0909673255222648;0	172246456917122;0	632332070516484
921;6;101;180;"AAGAAAAAACGAATCCTCGGAGAACCCGCGGGGAAGTCACTTTCGTACGCTTCCGGCCTG";"A_33_P3271105";"PABPC4";"NM_001135654";"ref|Homo sapiens poly(A) binding protein	cytoplasmic 4 (inducible form) (PABPC4)	transcript variant 3	mRNA [NM_001135654]";6	18639214843259;0	15855915540377;0	923971665500383;0	380020716511113;0	51495143411351;0	189043253705418
922;6;102;914;"TGCGGGCTGTGCCAGGCACAGACCTTAAGATACCAGTATTTGATGCTGGGCACGAACGAC";"A_33_P3321417";"DMAP1";"NM_019100";"ref|Homo sapiens DNA methyltransferase 1 associated protein 1 (DMAP1)	transcript variant 1	mRNA [NM_019100]";7	95898157692899;0	0284610256810449;0	170291140920148;0	868613118323258;0	913577183903065;0	335382313583381
924;6;104;1966;"GCAAGTAGCTAAGCCTATAGCATGGTGTCTTGTAGGACCAAATCGATGTTACCTGTCAAG";"A_23_P117782";"LARP6";"NM_018357";"ref|Homo sapiens La ribonucleoprotein domain family	member 6 (LARP6)	transcript variant 1	mRNA [NM_018357]";12	3643184609795;0	342600162488333;5	37510672682398;0	000474733897290071;0	00201610957769363;0	740131766114954
927;6;107;5094;"CCAAACTCACCATTTGGTCCTCTTTAATCTTTGAGGGTTTCAATAAAAATTGTTCACTCA";"A_33_P3264419";"YTHDF3";"NM_152758";"ref|Homo sapiens YTH domain family	member 3 (YTHDF3)	mRNA [NM_152758]";11	1003960043663;-0	0850969207523598;-0	700074615707094;0	501879582261482;0	628472447551346;0	230717827893505
928;6;108;3320;"CCACCTCTGCTATGTAACTGTCTTGTTAAAAGGGTGTTTTCTCCTAATTTCTGATATATT";"A_33_P3420402";"HACE1";"NM_020771";"ref|Homo sapiens HECT domain and ankyrin repeat containing	E3 ubiquitin protein ligase 1 (HACE1)	mRNA [NM_020771]";8	37207760086245;0	318547624416151;2	839824508987;0	0197432114861151;0	0486028569173181;0	178425412618686
929;6;109;503;"TAATACACCAGGCTGTACCAGGGCAGTTCCTTACTTTAATCCTTTAACCAAAAACCACAG";"A_21_P0014803";"LOC100652974";"XR_132617";"ref|PREDICTED: Homo sapiens superoxide dismutase [Cu-Zn]-like (LOC100652974)	miscRNA [XR_132617]";9	02017868379804;0	0829750197777912;0	813167421634006;0	43746525754262;0	570522066371693;0	209443727296951
930;6;110;1529;"TCTATATCGCTCATCACAACAAGCGGAAGATCATTGCTTTTGTCCTGGAAGGAAAAAGAT";"A_23_P209933";"TGOLN2";"NM_006464";"ref|Homo sapiens trans-golgi network protein 2 (TGOLN2)	transcript variant 1	mRNA [NM_006464]";10	6587575734759;0	208459974174017;2	93237594290078;0	0170021424065831;0	0428247450410022;0	157213449761391
931;6;111;3592;"CTCAGCAACACAACTCTTGAAATGCTTATCAGGATAATGGTAGCTATAGCTGGCCATTTA";"A_23_P129058";"USP8";"NM_005154";"ref|Homo sapiens ubiquitin specific peptidase 8 (USP8)	transcript variant 1	mRNA [NM_005154]";9	39245857613781;-0	129732959995241;-1	79808268991273;0	106300042100711;0	195180609083697;0	716525383891916
932;6;112;1981;"AAGGTTTGATATGGCAGTGATGTTTATGTCAGAAACAGAGAAAAAGATTGCACGTGCATT";"A_23_P2683";"RPAP3";"NM_024604";"ref|Homo sapiens RNA polymerase II associated protein 3 (RPAP3)	transcript variant 1	mRNA [NM_024604]";9	81094145229056;0	097757425834148;1	92145217425937;0	0874276301020812;0	166928986394029;0	61281116305657
933;6;113;5346;"ATGAGGGCCTCGTTTATTAAGATCTTTAAACTGCTTTATACACTGTCACGTGGCTTCATC";"A_23_P206441";"FANCA";"NM_000135";"ref|Homo sapiens Fanconi anemia	complementation group A (FANCA)	transcript variant 1	mRNA [NM_000135]";9	83339898803519;-0	287323814135267;-5	97868323432093;0	000222915856543561;0	00106320324048789;0	390311370387739
934;6;114;2369;"CACTTCTGAGCCCCTTCAGAGCAGGAAACAACCTCAGACTCATCACAAAGTAGACATATA";"A_23_P325654";"TRIM42";"NM_152616";"ref|Homo sapiens tripartite motif containing 42 (TRIM42)	mRNA [NM_152616]";6	36791553405204;0	294162901862723;0	811710696805537;0	438258129478991;0	571185719761611;0	209687360361841
937;6;117;269;"TTACAGAGTCCAGATCCCATGTACTGCTGAACTCAGGCAGAAAGAAGAGTGCAGTTTATT";"A_21_P0003586";"XLOC_003480";"TCONS_00008015";"linc|BROAD Institute lincRNA (XLOC_003480)	lincRNA [TCONS_00008015]";6	56665139729224;0	714544353698959;1	13207662269249;0	287362491609448;0	41957009891071;0	154027916811474
938;6;118;568;"TTTCAAGTTACCTGCCCTCAGAGACATTAGCTACAGTACAGTGGGATGAACACTAGGCTT";"A_21_P0007071";"XLOC_008573";"TCONS_00018786";"linc|BROAD Institute lincRNA (XLOC_008573)	lincRNA [TCONS_00018786]";6	68817978575553;0	124926634301913;0	408686619882459;0	692488413442042;0	785570456677298;0	288389904964111
939;6;119;0;"ATTTCTGTGTTGATCCTGTGTTTGACAATGGCTCCTTCACATGATGAGGAATGTGGCTAG";"A_33_P3404221";"A_33_P3404221";"A_33_P3404221";"Unknown";7	87080640306611;-0	197441619856296;-1	11974981214785;0	292307936387093;0	425120838753148;0	15606564280032
940;6;120;1544;"CTGGTCTTTTCCGGTTGTTGAAGACATTGGATACTGGGGAAACACCTTCTGAGACCAAAA";"A_23_P108761";"C2orf29";"NM_017546";"ref|Homo sapiens chromosome 2 open reading frame 29 (C2orf29)	mRNA [NM_017546]";9	65572268402608;-0	0274188153379331;-0	447122154693555;0	665536118455262;0	763963483337745;0	280457792783732
941;6;121;7446;"AACACCTAGTCTAGGGATGCACAGCAGAATCCCCTAGGGTTAAAAAACAAAACAAAACAA";"A_33_P3413671";"ABL2";"NM_007314";"ref|Homo sapiens v-abl Abelson murine leukemia viral oncogene homolog 2 (ABL2)	transcript variant b	mRNA [NM_007314]";9	35615094293383;0	0847169739931211;1	35995791578548;0	207498264111384;0	329082196414406;0	120809002607791
942;6;122;810;"CTGAATCTCATTCGAGGAGTTCACCTTGCAGAACATTCTTTACAGGTTGCCCATGAGGAA";"A_23_P502641";"SEC22C";"NM_032970";"ref|Homo sapiens SEC22 vesicle trafficking protein homolog C (S. cerevisiae) (SEC22C)	transcript variant 1	mRNA [NM_032970]";10	3870114921269;0	317337894725085;6	45325712416305;0	000127233986786497;0	000665727958284991;0	244394657398155
947;6;127;9322;"GTTACCATAGAAAGGCATTTCTTCAATGGCTGGTTGTAGTTAGTTCATGTTTTTCAATCA";"A_33_P3214665";"MAP2";"NM_002374";"ref|Homo sapiens microtubule-associated protein 2 (MAP2)	transcript variant 1	mRNA [NM_002374]";7	2361103751889;-0	377502535669946;-4	45599152699697;0	00165650764288929;0	00583668191702369;0	214269786885285
948;6;128;3532;"AGAGGAGAACCTTCGGCGCTCTGACAAGGAGTTAGAAAAACTAGATGACATTGTTCAGCA";"A_23_P89509";"SPAG5";"NM_006461";"ref|Homo sapiens sperm associated antigen 5 (SPAG5)	mRNA [NM_006461]";13	8128094025729;0	259492728820488;4	35651767907661;0	00191040989435576;0	00659199982847612;0	241998179526576
949;6;129;1362;"ACGCACTAAAGCACTCAAAGACGTACCACTTTCCCAAAACTGTCACTCAGAGTCTAAAGA";"A_23_P71530";"TNFRSF11B";"NM_002546";"ref|Homo sapiens tumor necrosis factor receptor superfamily	member 11b (TNFRSF11B)	mRNA [NM_002546]";9	45676566037555;-0	867260509484538;-15	6509419980604;9	46659898118166e-08;2	1682217452984e-06;7	9.59735e+06
950;6;130;521;"TGGCCTTCACCAGCTCTTACACCTCGACTCCCGTGACACAGAAGCCAGTGACCACCGTCA";"A_33_P3239228";"ENST00000483366";"ENST00000483366";"ens|mucin 3A	cell surface associated [Source:HGNC Symbol;Acc:7513] [ENST00000483366]";6	8317973528467;-0	162214941700802;-0	50494588170079;0	625938654643569;0	732888440781184;0	26904986814315
952;6;132;1934;"TTATTCTTTTATTGTCAGTATCTGTATCTCTCTCTCTTTTTGGAGGTGCTTAAGCAGAAG";"A_23_P104689";"RELA";"NM_021975";"ref|Homo sapiens v-rel reticuloendotheliosis viral oncogene homolog A (avian) (RELA)	transcript variant 1	mRNA [NM_021975]";10	762027370653;-0	199330001507755;-2	64257340284652;0	0271904415350877;0	0638724292721455;0	234481371480441
956;6;136;494;"TGATGACCAAAGAGGAGCTGGAGGAGGAGCAGAGGATTGAGCTGACCTCTGACCTCACTT";"A_24_P324314";"MXRA7";"NM_001008529";"ref|Homo sapiens matrix-remodelling associated 7 (MXRA7)	transcript variant 2	mRNA [NM_001008529]";9	40936832413162;-0	0840516607147102;-1	00080604086808;0	343515120157652;0	47847186056818;0	175651277647197
959;6;139;382;"CCTTATGATCTCCTAGGCTGTAATAGTTTCTTAGACTTTCCTTGTTTCTCACGAGATTGA";"A_33_P3262133";"GFM1";"ENST00000312756";"ens|G elongation factor	mitochondrial 1 [Source:HGNC Symbol;Acc:13780] [ENST00000312756]";6	22160233172226;-0	200992755102968;-0	640774026468587;0	537916924344081;0	660189421258297;0	242361411171554
961;6;141;1432;"CCTCAGGGATTAAAATCCTACTTTTTAGTGTAGTTCCCACCTCATTCATGAAAATGAATA";"A_23_P108673";"FAM176A";"NM_032181";"ref|Homo sapiens family with sequence similarity 176	member A (FAM176A)	transcript variant 2	mRNA [NM_032181]";9	54566953141922;3	30111305210696;53	5893939344043;2	01992853458108e-12;1	2500250046696e-09;4	5889.53
964;6;144;3386;"CGCTGGATCCTGTCAATTGGCCTTAAAGAATATGCAAACAATCTTATAGAGAGTGGTGTT";"A_23_P302116";"PPFIA1";"NM_177423";"ref|Homo sapiens protein tyrosine phosphatase	receptor type	f polypeptide (PTPRF)	interacting protein (liprin)	alpha 1 (PPFIA1)	transcript variant 1	mRNA [NM_177423]";8	90655166567363;-0	325785392738767;-2	43288421924436;0	0382539090504528;0	0849982322342169;0	312036074012044
965;6;145;1509;"TCAGCCCATCACAAAACAAGACTGCCTCACACCCCCAGGATTACACAGTGGAGAATCTCA";"A_24_P348989";"LILRA1";"NM_006863";"ref|Homo sapiens leukocyte immunoglobulin-like receptor	subfamily A (with TM domain)	member 1 (LILRA1)	mRNA [NM_006863]";7	53681018649772;0	375065511163131;1	41879052174603;0	190226160007251;0	307426568352417;0	112859028845857
967;6;147;4331;"GGCCCAATATCAGTATTCTTTTTGTGTGTGCCAATTTTGTTATCACATCCCTATGAAGTT";"A_24_P192994";"FADS1";"NM_013402";"ref|Homo sapiens fatty acid desaturase 1 (FADS1)	mRNA [NM_013402]";12	851409039693;0	617881597269346;7	62762345149266;3	56204721116223e-05;0	00023441038702495;8	6.05414e+08
969;6;149;5571;"GCTACTGAAAAGAGGAATGTGTTGAATGTCGCGTTTGCTGTCCACTCGTCCTAGAAGTTT";"A_23_P141180";"TOM1L2";"NM_001082968";"ref|Homo sapiens target of myb1-like 2 (chicken) (TOM1L2)	transcript variant 3	mRNA [NM_001082968]";10	94717164819;0	321580152061864;4	65093780111125;0	00125786142942015;0	00462433326212815;0	169763388968094
972;6;152;0;"AAACTGGCCACTGACAAAAATGACCCCCATTTGTGTGACTTGAGATACATTACCTGAATG";"A_33_P3352407";"A_33_P3352407";"A_33_P3352407";"Unknown";15	9887940218792;-0	925615088628993;-15	3908508508707;1	09266598073062e-07;2	4149719271917e-06;8	8.65577e+06
973;6;153;463;"TATCGAAAGGGGCAATCAACTTAACATTCCTCTTGGCAAATTCCGGTGCCAGTTTTGCAG";"A_21_P0012703";"XLOC_l2_011415";"TCONS_l2_00021481";"linc|BROAD Institute lincRNA (XLOC_l2_011415)	lincRNA [TCONS_l2_00021481]";6	49688724292286;0	0977284606324682;0	840379608078826;0	422833093944551;0	556901279545519;0	204443415249892
974;6;154;1469;"GAATGTACCTCTATTAGTTTCAATTGAGTAATTCTAGACATAACTGGTTTGACTCTGTCC";"A_23_P167595";"UBE2B";"NM_003337";"ref|Homo sapiens ubiquitin-conjugating enzyme E2B (UBE2B)	mRNA [NM_003337]";9	07436693871561;0	637415459328338;11	0409891932884;1	80303838644999e-06;2	08748887346319e-05;7	6.63357e+07
975;6;155;1415;"GTGTGTTATAGAGATTCAGAGCAGGGAGGAAAAGTTAGGGTAGATTATTATTAAAGGGTT";"A_23_P33914";"NUP62CL";"NM_017681";"ref|Homo sapiens nucleoporin 62kDa C-terminal like (NUP62CL)	transcript variant 1	mRNA [NM_017681]";8	0024821768967;0	0600991965060738;0	36091184834382;0	726635902899904;0	811914699837462;0	298061111049744
976;6;156;1634;"CATTAACACCTCGTGAATACAATTTAACTTCCATTTAGCTATAGCTTTACTCAGCATGAC";"A_23_P122041";"PPP2CA";"NM_002715";"ref|Homo sapiens protein phosphatase 2	catalytic subunit	alpha isozyme (PPP2CA)	mRNA [NM_002715]";12	0330698433607;0	808473527559148;15	3262826758868;1	13267265709912e-07;2	47955143574487e-06;9	1.02654e+06
978;6;158;369;"AGAGACCCTTGGGCTTCCTTCCTTCAAGGCCTCTGGTCTCTAGCAGAGAGAAGAGAGGGA";"A_21_P0009187";"XLOC_012408";"ENST00000456090";"linc|BROAD Institute lincRNA (XLOC_012408)	lincRNA [TCONS_00025215]";6	60519234390126;0	0381165722440606;0	400917301009607;0	697994299959718;0	789756217176039;0	289926534889758
980;6;160;0;"TTCTATAGTAAATGCTGCTCCCTGGATTCAGGCAACATTGTGCCTCTGCTAGATCTAGCT";"A_33_P3424108";"A_33_P3424108";"A_33_P3424108";"Unknown";6	86386871838063;-0	461792365174478;-1	09893535055961;0	300810824094615;0	433812508710438;0	159256432183572
985;7;1;1346;"GGAATCAATTCAATTTGGACTGGTGTGCTCTCTTTAAATCAAGTCCTTTAATTAAGACTG";"A_23_P79518";"IL1B";"NM_000576";"ref|Homo sapiens interleukin 1	beta (IL1B)	mRNA [NM_000576]";12	4414662174913;-0	243129753622412;-2	63036499852298;0	0277357655921721;0	0649212203052151;0	238331576688431
987;7;3;0;"GGACAGGACATCCAACCCAAAAGAGACCTCGCCCACCTTGTGAAACGGCCCTGCTATATC";"A_24_P383330";"A_24_P383330";"A_24_P383330";"Unknown";14	6756086013956;-0	166885386069284;-3	00933706125995;0	0150216723394419;0	0384839913926629;0	141278156860841
988;7;4;4957;"TATTAGATTTGGAAGATTTCTATTATAAGGAATTTTTGCCCAGTCGTTCTGGACCAAAGG";"A_23_P86411";"MYO3A";"NM_017433";"ref|Homo sapiens myosin IIIA (MYO3A)	mRNA [NM_017433]";6	43684515023747;0	0389979468600492;0	111138867804681;0	913987581595589;0	944973749514511;0	346908272198451
989;7;5;2466;"GAAATGGCAGCAGTTTCTGATGCTGAGGCAGTTTGCAATCCCATGACAACTGGATTTAAA";"A_23_P11685";"PLA2G4A";"NM_024420";"ref|Homo sapiens phospholipase A2	group IVA (cytosolic	calcium-dependent) (PLA2G4A)	mRNA [NM_024420]";7	19906047505594;1	30808698459914;18	831493669062;1	92549893615337e-08;6	81656279047474e-07;2	5.02421e+06
991;7;7;4508;"AGGAATCCAAAGTTGAAGAGCCCAGGAAACGGGAAACTGTATCCATAATGCTGACCAAAT";"A_23_P119040";"GREB1L";"NM_001142966";"ref|Homo sapiens growth regulation by estrogen in breast cancer-like (GREB1L)	mRNA [NM_001142966]";6	1100825697186;-0	175691686963894;-3	28804631291443;0	00963313212203901;0	026346608166515;0	967207430050941
992;7;8;3103;"AAATTGTGAAACTCCCTGTTGTGTTCTGTACCAGTGCATGAAACCCCTGTCACATATCCC";"A_33_P3257714";"RPS23";"NM_001025";"ref|Homo sapiens ribosomal protein S23 (RPS23)	mRNA [NM_001025]";12	1762886531717;0	384277954196996;6	02338021371142;0	000211188657090997;0	00101539683029856;0	372761211806815
994;7;10;1447;"AACCTGTCATGGAGATGTGAGGGCCTTGTGTGTGCTTCCGTGTGTGACTGTGTGACTGCG";"A_33_P3360753";"KCNQ2";"AK293727";"gb|Homo sapiens cDNA FLJ60440 complete cds	highly similar to Potassium voltage-gated channel subfamily KQT member 2. [AK293727]";8	03576467206724;-0	0260887668168674;-0	135628493945665;0	895151828977991;0	932134891583615;0	342195013206763
995;7;11;1557;"TGTGGTTGTGGCTTTGTCGCCGGATTGCAGAGCTGAAGGGAGCCCTGTGGATGACAAACA";"A_33_P3355708";"C14orf180";"NM_001008404";"ref|Homo sapiens chromosome 14 open reading frame 180 (C14orf180)	mRNA [NM_001008404]";6	57160493266956;-0	409556436449174;-1	27563765185845;0	234569055127422;0	361065349373407;0	132550302657836
998;7;14;447;"CTCCTTTTTGCTGATTAAGTTCCCCCAAAACCCCCTTAAGAATTTTAATAAGAAATGCAA";"A_21_P0002930";"XLOC_002577";"TCONS_00005947";"linc|BROAD Institute lincRNA (XLOC_002577)	lincRNA [TCONS_00005947]";6	84925072044979;0	217050726230308;1	52470508312948;0	162261746921051;0	271957448745803;0	998379994199581
1002;7;18;3683;"ATTTTTGGGGGAGACCTGCCTCTCAGAATCATCTGATGGATCTTCAAGTGAAGATGCTGA";"A_23_P117225";"ERCC5";"NM_000123";"ref|Homo sapiens excision repair cross-complementing rodent repair deficiency	complementation group 5 (ERCC5)	mRNA [NM_000123]";10	9296735055033;0	354402348515757;6	68512160311134;9	77289515853679e-05;0	000534940918866668;0	196381571432676
1003;7;19;3515;"CACAGAGAGACTAATCCCAATACAAGAATATTGACAACAAAAGGACAAAGTAGTTATTGC";"A_24_P219053";"KIAA1704";"ENST00000497558";"ens|KIAA1704 [Source:HGNC Symbol;Acc:20298] [ENST00000497558]";8	35340926357378;-0	432007175697382;-4	41614721020101;0	00175358118519275;0	00612701247363609;0	224928079966185
1007;7;23;2358;"CCAAAGTGGAGACATTCTGTGTGTGATTATGCATGAGACTGTACTGGTAAGACTTGTATC";"A_23_P429020";"HKR1";"NM_181786";"ref|Homo sapiens HKR1	GLI-Kruppel zinc finger family member (HKR1)	mRNA [NM_181786]";8	00767767097187;-0	398118625387198;-2	72338872860271;0	0238440942148854;0	0571292496340564;0	209726558994115
1014;7;30;2819;"ATGGAAACCCTACCAGATGGAACCAAACGATCAAGGAGGCAGATTAAGGAACCAGTGAAA";"A_24_P21056";"PHF14";"NM_014660";"ref|Homo sapiens PHD finger protein 14 (PHF14)	transcript variant 2	mRNA [NM_014660]";10	1348697136426;1	05831713032376;15	7895002467874;8	7781533367623e-08;2	06040098013866e-06;7	5.63915e+06
1017;7;33;1812;"TGATGGGAGAATGGGGACTCTCTCTTTTATTGTGCAAATTCCACTTTCCATCATGCAGGA";"A_23_P305616";"LOC652276";"NR_015441";"ref|Homo sapiens potassium channel tetramerisation domain containing 5 pseudogene (LOC652276)	non-coding RNA [NR_015441]";6	23869962124309;0	186272242303382;0	949069678436132;0	367796949141309;0	503347189902497;0	184783232396383
1018;7;34;1564;"TGAGGTAAGCAGGAATGTAAATGGAGTTCAAGGCCTTAACATTTTTGAGCACTGCTACTA";"A_24_P237757";"ZMYM2";"AL136621";"gb|Homo sapiens mRNA; cDNA DKFZp564B162 (from clone DKFZp564B162). [AL136621]";10	5244282409708;0	0442023060655181;0	367415162993245;0	721947684240622;0	808416607935946;0	296776930385287
1019;7;35;4025;"TTGGGGCATGACCCAGCCTATGGTTTGCCATACTCCCTCTTTTTCTCCGTTTTTTCATTA";"A_23_P113184";"FTO";"NM_001080432";"ref|Homo sapiens fat mass and obesity associated (FTO)	mRNA [NM_001080432]";10	7250201022928;0	825394877991872;16	4083204493683;6	3121461601586e-08;1	61210209074527e-06;5	918170
1020;7;36;1028;"TTTACTTAATGCAGGTTAACTTCATCAACCCTGGTGAAAATGCCACCTCCTCATGAGGAA";"A_21_P0001831";"XLOC_001365";"ENST00000426539";"linc|BROAD Institute lincRNA (XLOC_001365)	lincRNA [TCONS_00002831]";6	11670433650476;-0	00622228616471787;-0	0550011360965299;0	957360016392582;0	973114922376363;0	357239147167368
1021;7;37;818;"TTCTATCTAGGTCCCATATAGATTGCCAACACTGTTAGTGCTTTCTCCTTTTGTGTTAAA";"A_21_P0006180";"XLOC_007462";"TCONS_00016073";"linc|BROAD Institute lincRNA (XLOC_007462)	lincRNA [TCONS_00016073]";6	56650742958864;-0	0304427870857706;-0	290832288442587;0	777884550363706;0	850254855048975;0	312136123193817
1022;7;38;893;"CCCATGTCAAAAACTTGGATGAAAATGGCTTGGATTTGCTCTCGAAAATGTTAATCTATG";"A_23_P138507";"CDK1";"NM_001786";"ref|Homo sapiens cyclin-dependent kinase 1 (CDK1)	transcript variant 1	mRNA [NM_001786]";13	1482675159192;0	1670097838128;3	21666192440552;0	010786581903466;0	0290082070577919;0	10649170937461
1023;7;39;1876;"CTGGAGCCTTCTCCCCTCCCCAGTTGGACTAGGGGCAGTGTTAATTTTGAAAAGGTGTGG";"A_23_P129829";"ORMDL3";"NM_139280";"ref|Homo sapiens ORM1-like 3 (S. cerevisiae) (ORMDL3)	mRNA [NM_139280]";12	7515867205595;-0	103785122437534;-1	69382372872374;0	125139623548815;0	221905377444963;0	814634386622135
1025;7;41;59;"GAATATCCTCTAAAAGGCAGCTAAGCACTCGCTGTCTTCTTCCTTTTGCCTCATCAAGCA";"A_21_P0005010";"XLOC_005633";"ENST00000450310";"gb|ig67d02.y1 HR85 islet Homo sapiens cDNA 5'	mRNA sequence [BM352801]";6	36571610581948;0	18974241072347;1	38427669281544;0	200202163571585;0	320013194105584;0	117479691160639
1027;7;43;1476;"TCTTTGGATGTGATTGGGTTTCTGCTGGCCTGTGTGGCAACTGTGACATTTATCATCACA";"A_21_P0012591";"UGT2B11";"NM_001073";"ref|Homo sapiens UDP glucuronosyltransferase 2 family	polypeptide B11 (UGT2B11)	mRNA [NM_001073]";7	91747480124555;0	599982784962895;5	04820460850669;0	000730173802377746;0	00290444906804893;0	106624909782193
1028;7;44;326;"AAGCTTGCCTCAATCCTGCATCCCCCATAGTTAAGAAAATCATCGAAAAGATGCTGAACA";"A_33_P3330264";"CXCL1";"NM_001511";"ref|Homo sapiens chemokine (C-X-C motif) ligand 1 (melanoma growth stimulating activity	alpha) (CXCL1)	mRNA [NM_001511]";12	314059930306;0	72292966674112;12	7371848114275;5	45383040481565e-07;8	26291254364254e-06;3	3.33887e+06
1029;7;45;837;"AGTCTGAAGGTCTCCTGCTAACTAAGCTGAGCCCCGCGTGGTGGGAATCAGATGTACCCA";"A_23_P65830";"HDDC3";"NM_198527";"ref|Homo sapiens HD domain containing 3 (HDDC3)	mRNA [NM_198527]";10	534974521722;0	511670145353934;8	94177121239872;1	01178455244098e-05;8	41758709864292e-05;3	9.01711e+07
1031;7;47;596;"ATCTAACCGCATCCGGGCAATCGAAAATATCGACACCTTAACCAACCTGGAGAGTTTGTT";"A_23_P154199";"PPP1R7";"NM_002712";"ref|Homo sapiens protein phosphatase 1	regulatory subunit 7 (PPP1R7)	mRNA [NM_002712]";11	1907790877888;0	00148031945403382;0	0184331958501648;0	985702428490756;0	991308961461108;0	363918340813163
1032;7;48;1010;"AACTGGACCAAATTAGACAAAGAGAATCAGATTATCACCAAGGAGAGAATTCAGAAGATC";"A_32_P456537";"TCP1";"NM_030752";"ref|Homo sapiens t-complex 1 (TCP1)	transcript variant 1	mRNA [NM_030752]";11	8125611047396;-0	152168067321861;-2	07813321983058;0	0680124677109151;0	136517041600377;0	501166207543458
1036;7;52;1218;"TATACGCAATGACGCCCTCGTTCCACTCTTGAGATCGTACGATTAGCGGCAACGACCGGC";"A_33_P3867391";"OR7E19P";"BM563292";"gb|AGENCOURT_6564958 NIH_MGC_119 Homo sapiens cDNA clone IMAGE:5743918 5'	mRNA sequence [BM563292]";6	34103031320156;-0	348470561596543;-0	951762261660627;0	36650282376247;0	501981735206481;0	184281961827117
1037;7;53;130;"CATGGGACTTAAACCATTGGATATTGAGTTTATGAAGCGTTTGCATGAAAAAGTGAGTAT";"A_21_P0011010";"XLOC_l2_002651";"TCONS_l2_00005011";"linc|BROAD Institute lincRNA (XLOC_l2_002651)	lincRNA [TCONS_l2_00005011]";9	85570936640494;0	498080748926487;5	3934245248412;0	00046362545217723;0	00197897162104566;0	726498091761201
1039;7;55;2396;"GAAAATAAACTGGAATGATCATCTATGGCTTGGGCCGCTTAGGAACAAGAACCGGAGAGA";"A_23_P122863";"GRB10";"NM_001001555";"ref|Homo sapiens growth factor receptor-bound protein 10 (GRB10)	transcript variant 4	mRNA [NM_001001555]";11	4702141050005;0	262909209440679;4	96121475512492;0	000820916574863555;0	00320712581997198;0	117736442679082
1040;7;56;739;"CACAAGCAGATTACTGCACGGGCAACAAAGGATGGGACTTTTGTCATTTCAAAGACATGA";"A_24_P372562";"PTPMT1";"NM_175732";"ref|Homo sapiens protein tyrosine phosphatase	mitochondrial 1 (PTPMT1)	nuclear gene encoding mitochondrial protein	transcript variant 1	mRNA [NM_175732]";13	2151320330059;-0	56238066539224;-12	2963284204041;7	33538989543805e-07;1	0412564924358e-05;3	8.22545e+07
1041;7;57;2569;"GGAGTGTCTGATGCAACTTTGAATTATGCAAATGGGAAATAGTGCACTTGTGTACAATCT";"A_21_P0000682";"LOC100527964";"NR_037642";"ref|Homo sapiens uncharacterized LOC100527964 (LOC100527964)	non-coding RNA [NR_037642]";9	44623080545306;0	0451457444339702;0	310347925612476;0	763485391277257;0	839304474816457;0	308116141169628
1042;7;58;454;"AACCAGGAAGTGAGAAACAAGGTTGTGGATGATGACACAAGTCTCCCTAGCAACAACTCT";"A_21_P0014451";"LOC100287506";"XR_109874";"ref|PREDICTED: Homo sapiens hypothetical LOC100287506 (LOC100287506)	miscRNA [XR_109874]";6	19310393583951;0	0322941919288811;0	0628852326536439;0	951256218755762;0	969454944564775;0	355895536744798
1044;7;60;4365;"CTCCCTGTTCCATATGCTCGCAATCTCAGCTATTTGGAAGCTACCAGGAATGCTTTCTAA";"A_23_P216630";"SLC44A1";"NM_080546";"ref|Homo sapiens solute carrier family 44	member 1 (SLC44A1)	mRNA [NM_080546]";11	8846790143926;-0	290718428683292;-3	40473009397245;0	00801652035799155;0	0225263382046951;0	826961920324617
1045;7;61;163;"TTTCCTTCTCCAAGCCTCACCTGATCTCCCAATTGGAACGAGGGGAAGGACCCTGGGTAG";"A_33_P3329664";"ZFP92";"NM_001136273";"ref|Homo sapiens zinc finger protein 92 homolog (mouse) (ZFP92)	mRNA [NM_001136273]";7	1693570553253;-0	00601563798141935;-0	016577037975545;0	987141988568113;0	992041628424217;0	364187309374882
1047;7;63;310;"ATCTGGTATGTTGCCATTCTGGGTCAGAGGAAAAAATCATGGAAGCATGAGACTCTTAAA";"A_21_P0002659";"XLOC_002063";"TCONS_00005137";"linc|BROAD Institute lincRNA (XLOC_002063)	lincRNA [TCONS_00005137]";5	83709111768997;0	0309088377462654;0	149800516076994;0	884282574822654;0	924413255946236;0	339360332054101
1048;7;64;1028;"TATGCTAGGAAACATTACAGGTTCTGAAGATGAAACAAGAATAGATATGCAATATCCTGC";"A_23_P82975";"VPS13B";"NM_181661";"ref|Homo sapiens vacuolar protein sorting 13 homolog B (yeast) (VPS13B)	transcript variant 4	mRNA [NM_181661]";6	63328246832207;-0	331727673101873;-1	60938455292444;0	14258885593904;0	245927183198537;0	902820573099174
1049;7;65;503;"TAAGCTTCCCAGCTGTAGGATTTCTGTTCCACGCCTGCTCTCTGACAGAACTCTTTTATT";"A_33_P3362048";"SHMT1";"ENST00000395682";"ens|serine hydroxymethyltransferase 1 (soluble) [Source:HGNC Symbol;Acc:10850] [ENST00000395682]";7	42806347132919;0	0907996601118803;0	491623898903324;0	634955842222236;0	7398659884387;0	271611387977214
1050;7;66;5303;"GTTGATATAATCCTACCAGAAGGAAAGCACTAAGAAACACTCGTTTGTTGTTTTTAAAGG";"A_24_P928052";"NRP1";"NM_003873";"ref|Homo sapiens neuropilin 1 (NRP1)	transcript variant 1	mRNA [NM_003873]";12	4401245283338;0	891428593938056;13	388477491371;3	5788787278188e-07;5	92125025507502e-06;2	1.73744e+07
1051;7;67;149;"TCTAGGTTTCTCTGCAGAAGACAGCAAGATGCCCCAGGGAATGTTTGTGAAAAAGGATGA";"A_21_P0011876";"XLOC_l2_007783";"THC2707941";"linc|BROAD Institute lincRNA (XLOC_l2_007783)	lincRNA [TCONS_l2_00014271]";7	54923576562661;0	960919643510437;2	85923396592007;0	0191330899833515;0	0473326288179775;0	173762292236067
1052;7;68;0;"GCCTGCAGGCTCCGGGGGGGTTGGGGGCTGGGGCTCCCGGGGTGATGCCTGCCCTTGGCA";"A_33_P3313652";"A_33_P3313652";"A_33_P3313652";"Unknown";7	78282146582815;0	345888738602683;0	86538994930178;0	409685440211096;0	544200078135644;0	199780691191993
1053;7;69;2330;"TTTACGGGCGAGATTATGAGTACAACAGATACAGAGACTATTACAGACAATACAATCGGG";"A_23_P409626";"HNRNPUL2";"NM_001079559";"ref|Homo sapiens heterogeneous nuclear ribonucleoprotein U-like 2 (HNRNPUL2)	mRNA [NM_001079559]";8	55115743641766;-0	0331503073418702;-0	125284904620577;0	903099660257647;0	937436229403328;0	344141181493789
1059;7;75;1995;"AGTTTTTCCTTCATTCTCCCCATGATCGTGACGGTCCTTTTCTCAAAGTACTAATACTTT";"A_21_P0008206";"XLOC_010707";"TCONS_00022098";"linc|BROAD Institute lincRNA (XLOC_010707)	lincRNA [TCONS_00022098]";7	38908581365576;1	1468353030608;2	26098316672633;0	0505945156065096;0	107219724215837;0	393613148433169
1060;7;76;299;"CTTCGGCGGCTAATGCTACCGCTTAAACGACTCAGCATCTCGACTTCCCAAATCAAAGGC";"A_23_P415411";"HIST1H4E";"NM_003545";"ref|Homo sapiens histone cluster 1	H4e (HIST1H4E)	mRNA [NM_003545]";5	72460049376719;-0	14319338919343;-1	36803479472089;0	205050239843792;0	326013671846503;0	119682519933964
1061;7;77;2049;"TGGTAACCGCTCTGTCCACCCTATTATCTTTAACAGAAACATCATAGCTGCATTAAAAAA";"A_33_P3639068";"GFRA1";"NM_005264";"ref|Homo sapiens GDNF family receptor alpha 1 (GFRA1)	transcript variant 1	mRNA [NM_005264]";7	42474961864351;-0	268708527508847;-1	49748854591978;0	169078719856114;0	280953898841772;0	103140676304174
1062;7;78;6837;"AAGTCCACATTCCTCCAGCTGATACGTTGAAGCAAACTCTTACTGCCTTTCTCCTGGTTT";"A_23_P166910";"DNAJC13";"NM_015268";"ref|Homo sapiens DnaJ (Hsp40) homolog	subfamily C	member 13 (DNAJC13)	mRNA [NM_015268]";10	8104205809647;-0	0844798599327632;-1	01161389751416;0	338597674332968;0	473207381222744;0	173718640434059
1063;7;79;891;"CTTGAGCATGACACTTCTTTCAGTATATTGCTTGATGCTTCAAATAAAGTTTTGTCTTGG";"A_23_P111701";"GNG11";"NM_004126";"ref|Homo sapiens guanine nucleotide binding protein (G protein)	gamma 11 (GNG11)	mRNA [NM_004126]";12	8431919714226;-0	429904137799443;-6	68849754455388;9	73588858510586e-05;0	000533732358890471;0	195937898311168
1064;7;80;1662;"TTCTCACTTCCGAGTCCATGTGCAGTGCTTGATAGAATCAACCCCACCTGGAGGGGCTGG";"A_23_P41204";"FAM131A";"NM_144635";"ref|Homo sapiens family with sequence similarity 131	member A (FAM131A)	transcript variant 1	mRNA [NM_144635]";8	51469255387608;0	495210784016377;6	03868585050562;0	000207328767179614;0	000999227157082519;0	366825180885031
1065;7;81;432;"CAGCAGATCCAGGATGCCAGAAACCATGTGAGCCAAGCCATTTACCTGCTTACCAGCCGG";"A_23_P100499";"ROGDI";"NM_024589";"ref|Homo sapiens rogdi homolog (Drosophila) (ROGDI)	mRNA [NM_024589]";7	13199946068341;-0	141063555011448;-1	26201197073071;0	239209540080934;0	366274714872209;0	134462707087449
1066;7;82;4176;"CCTCTCTCGGCAGGGCGGCGAGCAGTGTCTGTGCATGAGGACCAGCTCCAGGCCCCTGCT";"A_33_P3294222";"RLTPR";"NM_001013838";"ref|Homo sapiens RGD motif	leucine rich repeats	tropomodulin domain and proline-rich containing (RLTPR)	mRNA [NM_001013838]";6	65388714098777;0	131716196595498;1	62301428197971;0	139630794211492;0	242005652917854;0	888424286485449
1067;7;83;1710;"CTTATTATGACACTCCAGATGGTCTCCTTAGCATCTCAGCTCTTCTGCAAGGAAGAGCTT";"A_23_P115316";"TOR3A";"NM_022371";"ref|Homo sapiens torsin family 3	member A (TOR3A)	mRNA [NM_022371]";11	1341332755998;-0	602391037098981;-7	10590222950919;6	15283382996315e-05;0	000365175567407256;0	134059200272414
1070;7;86;6681;"CACTGCTATCGCTATTTAAGAACCCTAAATCTGTCACCCATAATAAAGCTGATTTGAAGT";"A_23_P365614";"NOTCH4";"NM_004557";"ref|Homo sapiens notch 4 (NOTCH4)	mRNA [NM_004557]";7	55089593382868;1	02346495035921;5	09165105134316;0	000688962071810795;0	00276953976279492;0	101672269138662
1072;7;88;698;"ATGAAGGCTCATAATCTATCAAGAGTGCTGAATTTCTGCATGTTGAAAGACTTAGTGGTT";"A_23_P145529";"PKIB";"NM_181795";"ref|Homo sapiens protein kinase (cAMP-dependent	catalytic) inhibitor beta (PKIB)	transcript variant 1	mRNA [NM_181795]";6	2779243704698;0	18087811184704;1	95043231097948;0	0834777764708337;0	160972845567559;0	590945640081535
1073;7;89;772;"CAACTACTGTGAAAAGCTGCTGCCCTGGCTGGACAAGTCCATCGAGTTCATCGATAAAGC";"A_32_P98298";"DUSP8";"NM_004420";"ref|Homo sapiens dual specificity phosphatase 8 (DUSP8)	mRNA [NM_004420]";7	81464583797708;0	00841181571604288;0	0710669373200886;0	944925580068153;0	965262687022829;0	354356521696777
1076;7;92;1930;"ATTATCCCTGTGAGGCCACCTAATAGGAGGCATGCTGTCAGAAAAGAAAATTCTGACCAG";"A_21_P0001785";"FLJ33534";"AK090853";"tc|Q9AGC5_STRPY (Q9AGC5) Collagen-like protein B (Fragment)	partial (5%) [THC2487411]";6	27433438992301;-0	000658464232919265;-0	00131002459551275;0	998983825422847;0	999217511001449;0	366821639722836
1080;7;96;108;"ACTGCAGCAAAGAGACACTGGGAATTAGCCCTTCTGTCCCCTCCTTGCCAGAAGCAGGAG";"A_21_P0009950";"XLOC_013489";"TCONS_00028131";"linc|BROAD Institute lincRNA (XLOC_013489)	lincRNA [TCONS_00028131]";9	26180115475579;0	496071629717505;2	34826384015853;0	0439030302961635;0	0953885298042361;0	350179780961523
1083;7;99;1784;"CCTTCCATTCTGCTTCTTCATTTTGGAACTGCTTCTAACAAAGTTACCATTAAACACAAA";"A_21_P0000117";"MID1";"NM_001193281";"ref|Homo sapiens midline 1 (Opitz/BBB syndrome) (MID1)	transcript variant 9	mRNA [NM_001193281]";6	86278042033882;-0	195415559928992;-0	575710659210446;0	579163036325006;0	694844217810297;0	255083495357934
1084;7;100;495;"GGACTCTGGAGATAAAACCTCATTGCAAGGCTACCTTTGCCACTGTATCTTAGCAGCTTT";"A_32_P176911";"LINC00239";"NR_026774";"ref|Homo sapiens long intergenic non-protein coding RNA 239 (LINC00239)	non-coding RNA [NR_026774]";7	1295246525372;-0	920161348796483;-2	36812076781712;0	0425072617333765;0	0928827108426737;0	340980696575905
1086;7;102;1747;"GGCACCACGTGGACTTTGATCTGTACAAGAAACCACCACCTTTCCTCGAGCTGCTCCCTT";"A_33_P3325671";"LOC100132731";"ENST00000508239";"ens|Uncharacterized protein FLJ43738 [Source:UniProtKB/Swiss-Prot;Acc:Q6ZUG5] [ENST00000508239]";6	46251924729957;-0	095998914997284;-0	258708595537351;0	801780553276593;0	867345894727714;0	31841039594274
1088;7;104;1122;"TGAGTTCTTTGAGCTGACGGTGGACGACGTGAGAAGACGCTTGGCCCAGCTCAAGAGTGA";"A_33_P3272117";"ASPSCR1";"NM_024083";"ref|Homo sapiens alveolar soft part sarcoma chromosome region	candidate 1 (ASPSCR1)	transcript variant 1	mRNA [NM_024083]";8	90846725251529;0	440160089159622;3	80430530164083;0	00432599097639589;0	0132796327025107;0	487507133253684
1089;7;105;2682;"GAAGACAGAAGTGTACTCTCTACAATGCAATTTACTGTACAGTTAGAAAGCAAAGTGTTA";"A_24_P309360";"TM9SF3";"NM_020123";"ref|Homo sapiens transmembrane 9 superfamily member 3 (TM9SF3)	mRNA [NM_020123]";11	8116942187081;-0	11159068022717;-1	07776491395004;0	309656724377092;0	44329166735419;0	162736315671011
1090;7;106;2501;"CCCTTTTGAGTCCTCGGGCCCAGAATCGTATCCCAAAGCCCTCCCATGGCCTAGAAAATA";"A_23_P142255";"SHD";"NM_020209";"ref|Homo sapiens Src homology 2 domain containing transforming protein D (SHD)	mRNA [NM_020209]";8	32822804950955;0	326313682024949;2	18655475373506;0	0570848032086506;0	118278859523172;0	434212218232171
1091;7;107;1190;"TCCAGATCAACAAATTGTGGAAGAAGCCAGTAACAGTACCCTAGAAAGTGCACCAAAAAA";"A_33_P3394380";"AKAP5";"NM_004857";"ref|Homo sapiens A kinase (PRKA) anchor protein 5 (AKAP5)	mRNA [NM_004857]";6	42962549958157;-0	233813504119075;-0	76700350808016;0	463062401357896;0	593750172359131;0	21797097169785
1093;7;109;1891;"AGTTTGGATATACCCTTTGCCATGTTTGCTCCCAAGAATTTGGAGCTGGAGGATACCGAT";"A_33_P3263696";"ATG13";"NM_001205119";"ref|Homo sapiens ATG13 autophagy related 13 homolog (S. cerevisiae) (ATG13)	transcript variant 3	mRNA [NM_001205119]";7	56262388073937;0	149842080628895;0	966517781515152;0	359470288197203;0	494538663340002;0	181549543913524
1095;7;111;1634;"CTGCTGTGTACACAGGAGAAATAATCACTCCACACCCGACTGAACATTTTCTAACCTTAT";"A_21_P0000842";"LOC100506660";"NR_038927";"ref|Homo sapiens uncharacterized LOC100506660 (LOC100506660)	non-coding RNA [NR_038927]";6	2780758389375;0	862530799698253;1	62104845007626;0	140053989376214;0	242530128511358;0	890349683059123
1096;7;112;2516;"GCCACTGCAGTCATCCCCCAGTGGCAGAAGGATGAATTGCGGGAGACTCTCAAATCCCTA";"A_24_P172990";"AARS";"NM_001605";"ref|Homo sapiens alanyl-tRNA synthetase (AARS)	mRNA [NM_001605]";9	26943523900655;0	157687075971925;1	7614906936809;0	1125910502493;0	20416882661008;0	749521930238555
1097;7;113;3344;"TGCAGTGGGGTTTGCTGCAGAATTCACTGCATAGCAGGAGATGTAAGCAGATGAGTTATT";"A_23_P332374";"ZNF175";"NM_007147";"ref|Homo sapiens zinc finger protein 175 (ZNF175)	mRNA [NM_007147]";9	16366674170059;0	0188740875558953;0	34080070578378;0	741209635400067;0	82302632991181;0	302140289325734
1100;7;116;2740;"TAGGACTCCAGGGAGCCTCGACCCTAGGGCTGATCCTCAAGTACCCCAGTTTCACACATA";"A_23_P305527";"TMC2";"NM_080751";"ref|Homo sapiens transmembrane channel-like 2 (TMC2)	mRNA [NM_080751]";5	81310382105467;0	21224507079619;1	14225471599961;0	283329343643261;0	415175577789278;0	152414649003602
1101;7;117;333;"GCTTTGGAACAGAAACCAGATGATGCACATATATTATCGTCAAAGAGCTTATTGTCACAT";"A_24_P280706";"SUGT1";"NM_006704";"ref|Homo sapiens SGT1	suppressor of G2 allele of SKP1 (S. cerevisiae) (SUGT1)	transcript variant 1A	mRNA [NM_006704]";9	89274898727314;0	32944139072802;4	83980515496405;0	00096849032473352;0	00370098784585259;0	135866557107201
1102;7;118;1291;"CACGAAGCTGTGTGCAAATAAATATCGTGTAACTCCAGCCCTTTTTGAGTTTATAAATAA";"A_33_P3788355";"NAV2-AS4";"NR_033989";"ref|Homo sapiens NAV2 antisense RNA 4 (non-protein coding) (NAV2-AS4)	non-coding RNA [NR_033989]";6	70566939031447;0	134475562002558;0	788816917161885;0	450846277306721;0	582098908832061;0	213693689179493
1105;7;121;2364;"GGACGGAAGTGAGACACCTCAGCTCTTCACTGTGTTGCCAGAGAAGAGAACAGCCACTGT";"A_23_P64083";"SF3B2";"NM_006842";"ref|Homo sapiens splicing factor 3b	subunit 2	145kDa (SF3B2)	mRNA [NM_006842]";13	1098477358536;-0	217528656360438;-3	57805453960402;0	00611958859356818;0	0178344829687578;0	654719739614257
1106;7;122;1754;"ACATAGCTATGTGCTTATAGGTCTTAGTTCACATTCCCCTCATTAAAATTATAGCTCAAG";"A_21_P0011976";"XLOC_l2_008343";"AK023515";"linc|BROAD Institute lincRNA (XLOC_l2_008343)	lincRNA [TCONS_l2_00014980]";5	96427868756978;0	13085424816775;1	42744952625217;0	187791798334126;0	304563051627465;0	111807806375419
1107;7;123;2460;"ATCAGATTTCTCGTTGGGCTGGAAATGTTTCGCTGTTGTATATTTTAAAGTAAATTGCAC";"A_23_P122007";"C5orf30";"NM_033211";"ref|Homo sapiens chromosome 5 open reading frame 30 (C5orf30)	mRNA [NM_033211]";10	6830659936616;1	10372072942929;16	8102052651513;5	12697403612444e-08;1	37928129164002e-06;5	634644
1109;7;125;1923;"AAGATGGTGTGATAAATGAAGAAGCTCTTTCTGTTACTGAACTAGATCGAGTCTATGGAG";"A_32_P22338";"PDCD6IP";"NM_013374";"ref|Homo sapiens programmed cell death 6 interacting protein (PDCD6IP)	transcript variant 1	mRNA [NM_013374]";9	02358644915437;-0	0344518744418938;-0	488742875977822;0	636914392492741;0	741476924622545;0	272202776985054
1110;7;126;4682;"TTTAACTAAGGTGAGACATTGATATATCCTTTTGCTACAAGCTATAGCTAATGTGCTGAG";"A_24_P207150";"UBE3A";"NM_130839";"ref|Homo sapiens ubiquitin protein ligase E3A (UBE3A)	transcript variant 3	mRNA [NM_130839]";10	398754764303;0	158756360091928;2	69948592752032;0	0247879032282224;0	0590563948977713;0	216801280742251
1113;7;129;3106;"ACTAAGATGGGTTTATAACTGGAACCTCCAATGACCAGATGTATATAGAGATTTACAAAG";"A_21_P0000083";"CLCN2";"NM_004366";"ref|Homo sapiens chloride channel 2 (CLCN2)	transcript variant 1	mRNA [NM_004366]";11	1984493821743;0	462188569570294;6	94764532232236;7	30502352014026e-05;0	000422038881289252;0	154934228790843
1116;7;132;993;"TTAGAAATGTCCATCAGCTTACGAGGAGATTCTCCCTCATCTCACAAACTACCTGCATCT";"A_21_P0005722";"XLOC_006844";"TCONS_00014761";"linc|BROAD Institute lincRNA (XLOC_006844)	lincRNA [TCONS_00014761]";6	03924324829817;0	280969851220661;1	6365317827232;0	136751996726603;0	238041826941206;0	873872728608197
1117;7;133;4677;"ACACATGCAAATTGTCAGCTTATTGAGACAACCCACTTAGATTCATATATGGACAAGGAC";"A_24_P12065";"CCNG2";"NM_004354";"ref|Homo sapiens cyclin G2 (CCNG2)	mRNA [NM_004354]";7	08355844369562;-0	351120326015305;-1	04111841041045;0	325444655504598;0	459656294510971;0	168743915919217
1118;7;134;4168;"CTGGAACTTGTGGTTGAGGCAGGGCCATCCCGATCCTTGCTCTACCTGGCTAGAGTTTCT";"A_23_P49546";"GRIN2C";"NM_000835";"ref|Homo sapiens glutamate receptor	ionotropic	N-methyl D-aspartate 2C (GRIN2C)	mRNA [NM_000835]";6	55659978250196;-0	238073702822558;-1	64010949985815;0	135999109126734;0	237099809564868;0	870414498995213
1120;7;136;1613;"AGACTGGACGGAGGAGTGGCTGAGTGAAGGCTTCGCCACTCACTTGGAGGATGTGTTTTG";"A_33_P3260146";"C9orf3";"NM_001193329";"ref|Homo sapiens chromosome 9 open reading frame 3 (C9orf3)	transcript variant 1	mRNA [NM_001193329]";6	30605910412133;0	541754824925542;6	47816072048207;0	000123640642931598;0	000650123511362551;0	238666126078362
1121;7;137;2523;"CCATCTTCAGGGTTGCACAGAATCCTCCAAGATACTTTGCAGCCTTTTTTCCCCCTGGTC";"A_24_P383523";"SAMD4A";"NM_015589";"ref|Homo sapiens sterile alpha motif domain containing 4A (SAMD4A)	transcript variant 1	mRNA [NM_015589]";9	97839224115371;1	40244612009739;24	9219750201757;1	68490043648087e-09;1	1864353620559e-07;4	355510
1124;7;140;3903;"GAATTGAGATTCATCATCAAAGAGCAATGCAGCGTCGTTAAAATAAAAACTGTGCCTTTT";"A_33_P3703501";"GALNT10";"NM_198321";"ref|Homo sapiens UDP-N-acetyl-alpha-D-galactosamine:polypeptide N-acetylgalactosaminyltransferase 10 (GalNAc-T10) (GALNT10)	mRNA [NM_198321]";11	339508893679;0	902711079593026;15	2282682203293;1	19654454260822e-07;2	58768839926967e-06;9	4.99634e+06
1127;7;143;849;"TCTTGGATCTTGGTTGTGGATCAGGTTTACTAGGTATAACTGCATTCAAGGGAGGGTCCA";"A_23_P85726";"METTL18";"NM_033418";"ref|Homo sapiens methyltransferase like 18 (METTL18)	mRNA [NM_033418]";9	17135028319795;-0	202064270367099;-2	74764043323519;0	0229237739608154;0	0552533178083319;0	202839846334017
1130;7;146;340;"CGAAGAAGCGTGCGTGCGTTTGCAAGTAAGAGAACCAAAGGTGTGTGTGCATGGGGGGCT";"A_33_P3380751";"ST8SIA1";"NM_003034";"ref|Homo sapiens ST8 alpha-N-acetyl-neuraminide alpha-2	8-sialyltransferase 1 (ST8SIA1)	mRNA [NM_003034]";7	2332709698833;0	0444109137480453;0	287989247142092;0	779989892969976;0	851398349980457;0	312555910358436
1131;7;147;524;"CTAGTTCTATTTCCAAAATATTATTGGTGCCCCTAGTTGTACTGCCTGAGTGTTGTCAGA";"A_19_P00319069";"LOC100506328";"AK055877";"tc|ALU6_HUMAN (P39193) Alu subfamily SP sequence contamination warning entry	partial (7%) [THC2620383]";6	68855913727803;0	0631205887701363;0	341570574322269;0	740649680166058;0	822489706251079;0	30194329000479
1132;7;148;1011;"CATCACCATTGCTAGAATACTGGCATGATTCTTCTGAGCAGAAGTTGAAACTGTAAATTT";"A_23_P102037";"COQ10B";"NM_025147";"ref|Homo sapiens coenzyme Q10 homolog B (S. cerevisiae) (COQ10B)	nuclear gene encoding mitochondrial protein	mRNA [NM_025147]";8	06203726568793;0	141870333572502;1	37179700633354;0	203918399422772;0	324534821633274;0	119139620861291
1134;7;150;3778;"ACGATAGACCAGCTGTAGCTCATTCCAGCCTGTACCTTGGATGAGGGGTAGCCTCCCACT";"A_23_P250455";"HDAC6";"NM_006044";"ref|Homo sapiens histone deacetylase 6 (HDAC6)	mRNA [NM_006044]";10	7403136190159;-0	777439968847329;-11	6157419536351;1	18175087946761e-06;1	50014766474428e-05;5	5.07176e+07
1139;7;155;2908;"TGCTGGAATCTACTAGAACCTTCTAATCCATGTGCTGCTGTGGCATCAGGAAAGGAAGAT";"A_23_P152995";"SLC6A4";"NM_001045";"ref|Homo sapiens solute carrier family 6 (neurotransmitter transporter	serotonin)	member 4 (SLC6A4)	mRNA [NM_001045]";6	1715853670539;-0	052353863708932;-0	887098061491334;0	398507809438272;0	533243848298207;0	195758561725786
1142;7;158;1935;"CCGATTCGTCAGTGTTGGACCACGGGATCCAAGCTTTGTAAATATCCCTCAACAGACACA";"A_33_P3319625";"NFIA";"NM_001134673";"ref|Homo sapiens nuclear factor I/A (NFIA)	transcript variant 1	mRNA [NM_001134673]";5	97401080345924;0	0136195158285384;0	196494299005542;0	848664362627865;0	89980623997116;0	330326877526651
1145;7;161;4341;"TTGATTTGAGTTTCAGTGTCTCTGAATTGAACATCCCACGTTGGAAGAAGATACATTTGG";"A_23_P149818";"UPF2";"NM_080599";"ref|Homo sapiens UPF2 regulator of nonsense transcripts homolog (yeast) (UPF2)	transcript variant 1	mRNA [NM_080599]";8	16133863390909;0	0246262066901917;0	221104654445286;0	83003131613308;0	887271052124718;0	325725098525143
1146;7;162;956;"TGAGAGGACACGAGCATCAGCCATGGTTCCAGCCAAGCCCCAGTGACGTCTCCCAGTCCT";"A_33_P3239298";"PRODH";"ENST00000491604";"ens|proline dehydrogenase (oxidase) 1 [Source:HGNC Symbol;Acc:9453] [ENST00000491604]";6	30449294072783;0	0013360322185143;0	00865921162566173;0	993283216859396;0	99568172727021;0	365523622052291
1147;7;163;1850;"TTTAAAGCCACCCAAGTCAGGGACATCCTTTTTCTTCCTCTGGACTTTGTCATCTGCAAG";"A_33_P3774867";"MGC11082";"BC094703";"gb|Homo sapiens cDNA clone IMAGE:30412101. [BC094703]";6	88402240584872;-0	113762384281062;-0	78440102489115;0	453301856392039;0	584448645326168;0	214556298355368
1149;8;1;1154;"CAAAATCCAGTGGCCAATGATGCATTTCCCCACAGAGACCCATACTAGATTTACCATCAG";"A_33_P3270926";"LOC389607";"XR_110088";"ref|PREDICTED: Homo sapiens hypothetical LOC389607 (LOC389607)	miscRNA [XR_110088]";6	01573601511853;0	365231954762175;1	97903567641539;0	0797459896245007;0	155274759249497;0	57002745816958
1152;8;4;5877;"CTTAATTTGTGGATGATACAGAAAGCCAGGCTTTGGGATACAAGTTCTTTCCTCTTCATT";"A_23_P113613";"CDCP1";"NM_022842";"ref|Homo sapiens CUB domain containing protein 1 (CDCP1)	transcript variant 1	mRNA [NM_022842]";12	6067686910012;0	405024589576534;7	804051539577;2	97994002784143e-05;0	000202394407125237;7	4.30079e+08
1153;8;5;733;"TACCTGACTAAGAATGGCTCAGAGATACCCTCCACCATGCAAGATGCCAAAGACTTGATT";"A_33_P3416882";"ARL9";"NM_206919";"ref|Homo sapiens ADP-ribosylation factor-like 9 (ARL9)	mRNA [NM_206919]";6	15665914784902;0	33979091622205;2	14187515985327;0	0613641974627522;0	125435685119585;0	460485561839367
1154;8;6;630;"CTTTGCAGAAATCTATCAAATGTGGAAGAAATTGGGACTTGCTCGTACATTAATTATGTC";"A_24_P109432";"NBEAL1";"NM_001114132";"ref|Homo sapiens neurobeachin-like 1 (NBEAL1)	mRNA [NM_001114132]";9	17624968164866;0	134005789687164;1	72028764630924;0	120086257257916;0	214926349196871;0	78901375290174
1155;8;7;837;"CGTGATGAGGAAGAACTTAGTGATTAAAATCTTGCCCTAGCACAGTAATAAAAATCAAGA";"A_33_P3341329";"ZCRB1";"NM_033114";"ref|Homo sapiens zinc finger CCHC-type and RNA binding motif 1 (ZCRB1)	mRNA [NM_033114]";11	0058243904804;-0	580746591297233;-7	74603460640764;3	15893284129878e-05;0	000212222252260949;7	7.90868e+07
1157;8;9;974;"GAACTTTAAGCACTTTTCCAAGAAGAGTGAAGGGCTGGAGAATAAATTGTGAACTAAAAT";"A_21_P0000885";"LOC284408";"NR_040027";"ref|Homo sapiens uncharacterized LOC284408 (LOC284408)	transcript variant 1	non-coding RNA [NR_040027]";7	37956449946266;0	420755102157846;2	77915346043867;0	0217816142154237;0	0529245201942265;0	194290623066977
1159;8;11;2901;"CTTCATTTTAGTCACCATGGAGTAAAAACATATATTCGATGATCTGCTCACATTCCTGCT";"A_23_P161719";"CWF19L2";"NM_152434";"ref|Homo sapiens CWF19-like 2	cell cycle control (S. pombe) (CWF19L2)	mRNA [NM_152434]";8	82008632482508;-0	0243838729291674;-0	268232594199184;0	794671789085363;0	862147939851166;0	316502180454093
1160;8;12;880;"CACTGTGCTAAACGCCTTCCATGTATTCATCTCATTAGTAAACATTTCTGAAACTATTCT";"A_33_P3227944";"C17orf69";"NR_026906";"ref|Homo sapiens chromosome 17 open reading frame 69 (C17orf69)	transcript variant 2	non-coding RNA [NR_026906]";7	49209477657262;-0	484414600420804;-6	76099354124875;8	97706380731686e-05;0	000498442598887234;0	182982713391681
1161;8;13;700;"TTCCGGAGCTGGGTTGCTTCTGCTGCAGTACAGAATCCACATTCAGATAACCATTTTGTA";"A_23_P106682";"EMP2";"NM_001424";"ref|Homo sapiens epithelial membrane protein 2 (EMP2)	mRNA [NM_001424]";11	6362532544037;0	288341626614821;6	14396932966189;0	000182772197134716;0	000898641604857931;0	329899329613199
1162;8;14;9307;"TATTATAAAGGTTTGTACTGTCTGAGTGCACAGCTACTGGAATAAATTTAGGGAATCTCA";"A_32_P114284";"IKZF2";"NM_001079526";"ref|Homo sapiens IKAROS family zinc finger 2 (Helios) (IKZF2)	transcript variant 2	mRNA [NM_001079526]";9	10029372010386;0	363263790339939;2	70081920371323;0	0247342737884893;0	0589417158259469;0	216380283664984
1163;8;15;1677;"AATGGAAGACAGTTCCCGACCTTCTACCCCACAGAGATCAGCTCATGAGAATCTCATGGA";"A_24_P249253";"LMOD2";"NM_207163";"ref|Homo sapiens leiomodin 2 (cardiac) (LMOD2)	mRNA [NM_207163]";6	30693775278697;-0	140820919968156;-0	427263355599978;0	679401448694482;0	775294562942025;0	28461753293491
1170;8;22;857;"GAACCAGACTGAGGAAAAGAGGCTCTTCAACAGCCCCAGTTATCCTGGCCCCATGACCGT";"A_23_P252082";"TMEM176A";"NM_018487";"ref|Homo sapiens transmembrane protein 176A (TMEM176A)	mRNA [NM_018487]";6	46271331791198;-0	157535414693894;-0	51838856762614;0	616906046632063;0	725731842639837;0	26642261728321
1171;8;23;3087;"TGTCCTGAAAGTTGGAATGAAAGAGACCCTATAAGAGCACTGACATGTTTCAGTGTCCTC";"A_23_P110196";"HERC5";"NM_016323";"ref|Homo sapiens hect domain and RLD 5 (HERC5)	mRNA [NM_016323]";10	3631153727795;-0	287495908883427;-6	1893986807013;0	000173171619032475;0	000859846119497768;0	315657161719849
1172;8;24;1739;"TTTTCTCAGGCCTGAGGGGGAACCATTTTTGGTGTGATAAATACCCTAAACTGCCTTTTT";"A_23_P12329";"APH1A";"NM_016022";"ref|Homo sapiens anterior pharynx defective 1 homolog A (C. elegans) (APH1A)	transcript variant 2	mRNA [NM_016022]";10	6061537104856;-0	329535398903866;-6	52316739738553;0	000117424607172085;0	00062293502452979;0	228684990628103
1173;8;25;861;"TTACAACATTATCATTGGCTAAAAAGAAAAGCCCTGAATGGTTCAATAAGGGAAGTATGG";"A_24_P144620";"C6orf35";"NM_018452";"ref|Homo sapiens chromosome 6 open reading frame 35 (C6orf35)	mRNA [NM_018452]";7	96478060034294;-0	221187801322833;-3	02103639668167;0	0147420907373025;0	0379035218860973;0	139147201649756
1175;8;27;8480;"GGATAAAATGGTACAATCTTAGTGAATGGGAATTGGAATCAAAAGAGTTTGCTGTCCTTC";"A_24_P329635";"TSC1";"NM_000368";"ref|Homo sapiens tuberous sclerosis 1 (TSC1)	transcript variant 1	mRNA [NM_000368]";10	9299738907973;-0	736163125823845;-9	85620885507157;4	59362954031188e-06;4	39928420770118e-05;1	6.15016e+08
1176;8;28;1313;"TTCGTCACCTGTAGAGCGTTTGTCACTGTTCATCTGGTATTAAAGATTCCACATTCTCAT";"A_32_P224234";"LOC645195";"AK123450";"gb|Homo sapiens cDNA FLJ41456 fis	clone BRSTN2012320. [AK123450]";7	19969911701023;-0	51847869346441;-2	04427559385912;0	071821378664355;0	142658599186405;0	523712411941948
1178;8;30;2939;"AAAGGCATGGCCCAGGTGTTTAAGTACAGGGTGACGTGTGCCTATGCAATGGGGTGGTAA";"A_33_P3359160";"FAM189B";"NM_006589";"ref|Homo sapiens family with sequence similarity 189	member B (FAM189B)	transcript variant 1	mRNA [NM_006589]";12	3507257892571;-0	191390651438732;-3	51899206603898;0	00670666917221888;0	0193007166841355;0	708546484018757
1179;8;31;459;"TAAACACCAAAATTGTGTTTAACAGAACCAAACAGCGCCACGCACTTGTGACCCTGACCT";"A_21_P0009459";"XLOC_012631";"BX111564";"gb|BX111564 Soares_NFL_T_GBC_S1 Homo sapiens cDNA clone IMAGp998H203957	mRNA sequence [BX111564]";5	8506700588964;0	119042947150046;0	89038757534003;0	396833022893656;0	531489019716063;0	19511434853812
1181;8;33;5053;"TTTTCCAAGATATGCAATGGCCTTTGTGCCTGCCCAAAGGCTTCGCCCCTCCAGTGCATG";"A_23_P411113";"CNTNAP1";"NM_003632";"ref|Homo sapiens contactin associated protein 1 (CNTNAP1)	mRNA [NM_003632]";8	77426234481712;1	12281614543395;18	5921764475981;2	15063823130831e-08;7	38607665779097e-07;2	7.11494e+06
1182;8;34;3753;"GACCATGTGTAAAATGGGCCAAAATACCTTTTACAAAATTAAAATAGAGATGGGGTCTTG";"A_33_P3389678";"SPPL2B";"NM_001077238";"ref|Homo sapiens signal peptide peptidase-like 2B (SPPL2B)	transcript variant 3	mRNA [NM_001077238]";5	93451351087571;-0	61691977999331;-2	28887181166851;0	0483538819240303;0	103315046830575;0	379278730298175
1186;8;38;545;"AATATGTCTGAGTTTATTGAGAGAACATTCAATTGATGGCACTGGCTGGGCTCCCACAAG";"A_23_P39561";"UBE2F";"NM_080678";"ref|Homo sapiens ubiquitin-conjugating enzyme E2F (putative) (UBE2F)	transcript variant 1	mRNA [NM_080678]";10	3079105711031;-0	126181697442748;-2	35518999047785;0	0434111023746174;0	0945111477176909;0	346958833248873
1188;8;40;2010;"GAGACCAGTTTTCCTTTGCAGAAAATCTATACCAGATAATCGGTATAGATTGCTTTCAGA";"A_23_P118536";"SLFN12";"NM_018042";"ref|Homo sapiens schlafen family member 12 (SLFN12)	mRNA [NM_018042]";8	80240030519602;0	30664322834201;6	12143782166472;0	000187747798240299;0	000918893406444537;0	337333946184215
1189;8;41;4355;"AGGCATTCTCTAAAAATCTCAAGCTTGGAATCCACAAGGACTCCACTAACTGATGCCACC";"A_33_P3324890";"HSP90AB2P";"NR_003132";"ref|Homo sapiens heat shock protein 90kDa alpha (cytosolic)	class B member 2	pseudogene (HSP90AB2P)	non-coding RNA [NR_003132]";12	1790799967984;0	351410717655543;2	44995246182202;0	0372052899433194;0	0831030908847101;0	305078841480802
1190;8;42;1227;"CTGCCCAGATTCTCCCATGGGTATTTCACGTCGAAAGGACGCTGTTACATATGTATAACT";"A_23_P106117";"SIX6";"NM_007374";"ref|Homo sapiens SIX homeobox 6 (SIX6)	mRNA [NM_007374]";7	65029854652969;0	0201465535383765;0	160106490647502;0	876394327858953;0	919182891288087;0	337440218646233
1192;8;44;3849;"AAAGGTTTAATCTTCTTTCTCCCCTAAGTATTATCTCTCCGTCTTTAAGTCCCAACAAAT";"A_21_P0003690";"XLOC_003809";"TCONS_00008359";"linc|BROAD Institute lincRNA (XLOC_003809)	lincRNA [TCONS_00008359]";6	79552635385003;0	0113977713386069;0	0263524086046062;0	979561294570886;0	987318494326743;0	362453404819376
1194;8;46;2901;"TGGGCCATCCAACCTTGAAGTCCTAAACCACACCTCAGTCACTAAAGGTCTGTTTAAAGT";"A_23_P77568";"EIF3C";"NM_001037808";"ref|Homo sapiens eukaryotic translation initiation factor 3	subunit C (EIF3C)	transcript variant 2	mRNA [NM_001037808]";15	9389433299503;0	0590044704684125;0	666624926160771;0	522020764532396;0	645927187216675;0	237125618143852
1195;8;47;393;"ACGCTGCTTTAGAATGAAGGTCTTCCAGAAGCCACATCCGCACAATTTTCCACTTAACCA";"A_23_P145777";"NDUFA4";"NM_002489";"ref|Homo sapiens NADH dehydrogenase (ubiquinone) 1 alpha subcomplex	4	9kDa (NDUFA4)	nuclear gene encoding mitochondrial protein	mRNA [NM_002489]";15	2713824944238;0	911249114771516;9	94006213206308;4	28614201960835e-06;4	16449426905183e-05;1	5.28823e+08
1198;8;50;2780;"ACAATTTTAGACCTCCTGGTGAGGATTTTAGGAGCCCGCCTGATGATTTTAGAAGTCACC";"A_33_P3283420";"RBM12B";"NM_203390";"ref|Homo sapiens RNA binding motif protein 12B (RBM12B)	mRNA [NM_203390]";8	06394658946167;-0	0303302761149169;-0	369981716389024;0	720100829633722;0	807022522031524;0	296265149044644
1199;8;51;1010;"GCACCTCTGTGGCTTCTGTGTACCATGGGAAAATTCTCATAGGCACCGTATTTCACAAAA";"A_23_P215549";"PON3";"NM_000940";"ref|Homo sapiens paraoxonase 3 (PON3)	mRNA [NM_000940]";9	26327473602805;0	37354081504226;3	17705652990318;0	011487603567843;0	0306577444694964;0	112547307995367
1200;8;52;1272;"AGCAAGAGTGAATTCATGCTCTTCTTCATGGAGGTGGATGTTTCTGGAAGGAGGTTTGTG";"A_21_P0011483";"XLOC_l2_005503";"TCONS_l2_00010194";"linc|BROAD Institute lincRNA (XLOC_l2_005503)	lincRNA [TCONS_l2_00010194]";5	63370046589342;-0	189273262141132;-1	93051037457974;0	0861743856718734;0	165106337147266;0	606120055485135
1201;8;53;782;"GCATACAAGGAGTCCTGAGGTGGTGATTTGGCCAGTGTTTTAACTTGTGACAAGTACTCA";"A_23_P163209";"BCL2L10";"NM_020396";"ref|Homo sapiens BCL2-like 10 (apoptosis facilitator) (BCL2L10)	mRNA [NM_020396]";6	2555193421059;0	318109083247867;0	991798913507173;0	347654099002482;0	482594638335773;0	177164786051793
1202;8;54;971;"GCGAGGGGAGCACCCGCGTGTGCACAGCCACAGGGTGGGGTGCAGGTGGCTGGGCCCAGG";"A_32_P161913";"C1orf70";"NM_001114748";"ref|Homo sapiens chromosome 1 open reading frame 70 (C1orf70)	mRNA [NM_001114748]";7	59928351129402;0	332674603221268;0	566084395426086;0	585411690548084;0	699919956807696;0	256946844309821
1203;8;55;2884;"CATAGTAAAACAGCTTGAAATATCCCATGCAAGAGAGTAGTTTCAAGTGGGCAACTCTGC";"A_23_P144916";"GFPT2";"NM_005110";"ref|Homo sapiens glutamine-fructose-6-phosphate transaminase 2 (GFPT2)	mRNA [NM_005110]";12	5685068379193;0	171541349223769;3	17783679586541;0	0114733454773487;0	0306273129374602;0	112435591133343
1204;8;56;799;"CTACATCAAGGTGAATTCTTGATAACCAGTTCTGTTCTTCCTTATGTCTTGTAAACATGC";"A_21_P0008788";"XLOC_011592";"TCONS_00023803";"linc|BROAD Institute lincRNA (XLOC_011592)	lincRNA [TCONS_00023803]";6	64168850424326;1	02386402397082;1	3509920404112;0	210244878417709;0	332354173338762;0	122010174452072
1205;8;57;3252;"TTTAGTCTTTGGCATTTTAGCGTTTGGGAGGTAGATTAATAAAGTATATTCCTTCAAGCC";"A_23_P116387";"INCENP";"NM_001040694";"ref|Homo sapiens inner centromere protein antigens 135/155kDa (INCENP)	transcript variant 1	mRNA [NM_001040694]";10	8093346838708;-0	0241503987826484;-0	529303178577712;0	609621915310666;0	719860312443022;0	264267126300752
1211;8;63;405;"GAACAGAGACCAGAAAGAGTAAAACCTTTTATGACAGGGGCTGCAGAACAAATCAAGCAC";"A_24_P179351";"TPT1";"NM_003295";"ref|Homo sapiens tumor protein	translationally-controlled 1 (TPT1)	mRNA [NM_003295]";16	2446687612452;0	0159345347079025;0	253591587531005;0	805607958836587;0	870123652928824;0	319430135695963
1212;8;64;558;"AGTGCACAAAATGGCCTCTTGATGCTCATATCTGTTCTTCAGCAGCCTGTCATAGGAACT";"A_23_P115137";"HBXIP";"NM_006402";"ref|Homo sapiens hepatitis B virus x interacting protein (HBXIP)	mRNA [NM_006402]";14	1151378320214;-0	435385067440137;-8	11765044960703;2	18650645908421e-05;0	000157971639739994;5	7.99279e+07
1213;8;65;779;"ACCCAGTTTGTGGCTTCTGCCCTCCAGCTAAGATCGTTCCTTAGCTGTCCCCAAATATGA";"A_33_P3230788";"MUSK";"ENST00000374440";"ens|muscle	skeletal	receptor tyrosine kinase [Source:HGNC Symbol;Acc:7525] [ENST00000374440]";8	21623127776363;-0	0503689532964096;-0	547374651658831;0	597661265016908;0	710035792381737;0	260660457563773
1214;8;66;2972;"AGGAGTGTTTGTATTCCTTTAGAGATCTGGATATTTTTCAAAGACTTGCTTTTTACGCAC";"A_23_P103864";"TTC13";"NM_024525";"ref|Homo sapiens tetratricopeptide repeat domain 13 (TTC13)	transcript variant 1	mRNA [NM_024525]";9	76989592926186;0	0555733985739799;1	02566282646037;0	332285298414402;0	466705541478614;0	171331757208037
1215;8;67;4028;"ACTAACACACAGGCACTCAATGAATGAGTGAAGGAAATAAAAGTCACCCCGTTGGTGAGA";"A_23_P11025";"ZNF185";"NM_001178106";"ref|Homo sapiens zinc finger protein 185 (LIM domain) (ZNF185)	transcript variant 1	mRNA [NM_001178106]";12	3825592446599;0	289320003340919;6	22154655461955;0	000166710540695946;0	00083381937749129;0	306102513132985
1219;8;71;462;"CAGCCCTGCTACTGCCCAGCCTGCTGTGTGTCCAGCTGCTGCCAGCATTCTTGTTGCTGA";"A_33_P3358908";"KRTAP9-6";"ENST00000391355";"ens|keratin associated protein 9-6 [Source:HGNC Symbol;Acc:18914] [ENST00000391355]";9	78716866828016;-0	0451406693568721;-0	530861795769385;0	608585413375713;0	71879463416393;0	263875906321668
1220;8;72;4353;"TTTCAAAGCAGCCTACCTGGGAACTGCTCATGGTCCTGCTGGCCACCTAGACCACCAATG";"A_33_P3391496";"SLIT3";"ENST00000404867";"ens|slit homolog 3 (Drosophila) [Source:HGNC Symbol;Acc:11087] [ENST00000404867]";6	64789800883745;-0	0301788880893694;-0	306343033061285;0	766432675862116;0	841452134326461;0	308904566086477
1221;8;73;545;"ACAGGTGACACTGGGTGACTCAGATCTTCTTGCCATAACATGGAGACACATGGTTAGAAA";"A_21_P0009960";"XLOC_013541";"BX116929";"gb|BX116929 Soares_multiple_sclerosis_2NbHMSP Homo sapiens cDNA clone IMAGp998E17622	mRNA sequence [BX116929]";7	2241790811252;0	0288105530449307;0	114571020878789;0	911344081777623;0	943268587365877;0	346282292000478
1222;8;74;2158;"TGTAGAGGCAATGGATATGGAAAACATTTTTCGTAAAATATGGGAGAATTTATAGAAAAG";"A_23_P309207";"ZNF577";"NM_032679";"ref|Homo sapiens zinc finger protein 577 (ZNF577)	transcript variant 1	mRNA [NM_032679]";7	55205477224747;0	110796927103959;0	386487740926019;0	708269713396328;0	797764066401604;0	292866287597486
1224;8;76;547;"AAGTATTCTGAAGATAGCGACAGTGACTCTGATTCTGAAACAGACTCCAGTGATCTCCCC";"A_21_P0006548";"XLOC_008225";"TCONS_00017366";"linc|BROAD Institute lincRNA (XLOC_008225)	lincRNA [TCONS_00017366]";12	0975253261731;-0	0960835284715085;-1	77413725446092;0	110378762902739;0	201029406882685;0	737996841061251
1226;8;78;1152;"AAGAGGAGCCACAGAGTATTGTTTAAAACTGCCCTATGTAGTTTCATAATTTGGTAACAT";"A_23_P136909";"HMGN5";"NM_030763";"ref|Homo sapiens high mobility group nucleosome binding domain 5 (HMGN5)	mRNA [NM_030763]";8	78623019279322;1	04718916215231;12	3445051944309;7	09832070717583e-07;1	01612082009305e-05;3	7.3027e+06
1227;8;79;10572;"TATGTTGCACAATGAGAAAAGAAATTAGTTTCAAATTTACCTCAGCGTTTGTGTATCGGG";"A_23_P99452";"BRCA2";"NM_000059";"ref|Homo sapiens breast cancer 2	early onset (BRCA2)	mRNA [NM_000059]";7	40851195852663;0	000728254527389005;0	0125676416379473;0	990251673251145;0	993896165093314;0	364868126288511
1228;8;80;10719;"AAGATCAAACCCTGCTTTTGTGTAAATGCTGACCTCCTTGCCTACATTTTAAAAACCTAG";"A_19_P00329711";"MAVS";"NM_020746";"ref|Homo sapiens mitochondrial antiviral signaling protein (MAVS)	nuclear gene encoding mitochondrial protein	transcript variant 1	mRNA [NM_020746]";11	9465692452754;-0	0586001346884046;-1	01095640454609;0	338895300577298;0	473502493800723;0	173826978887464
1230;8;82;1390;"AGGCTGAACTGTCTCTTATAGAATGAGGTCAAAGACACTCCCAGTTGCAGGGAGGGTAGA";"A_23_P435636";"DAND5";"NM_152654";"ref|Homo sapiens DAN domain family	member 5 (DAND5)	mRNA [NM_152654]";7	54650842496366;-0	124560709619153;-1	40467052297855;0	194254382179159;0	312711656754645;0	11479923182713
1231;8;83;1828;"CCAGCAGACAAGCAGAGAAACAACTGGGGAATTTATTGACTCATTTAGTTATTCTTTCTA";"A_23_P113471";"FAAH2";"NM_174912";"ref|Homo sapiens fatty acid amide hydrolase 2 (FAAH2)	mRNA [NM_174912]";6	36173372637782;-1	50365567142465;-20	7466861726573;8	31815122674218e-09;3	76696532472939e-07;1	3.82886e+06
1232;8;84;5753;"GGGTAAGGTTTACCACAAGATGAGTTATTTTGGGTTTCAGAAGTTTTTTGGATTTTTGGA";"A_33_P3335740";"FLJ10038";"NR_026891";"ref|Homo sapiens uncharacterized protein FLJ10038 (FLJ10038)	non-coding RNA [NR_026891]";6	87184680783453;-0	160998165277126;-1	622331710611;0	139777603829288;0	242142726702545;0	88892749654642
1234;8;86;1102;"ATTTGAGTCCAACGTGTGTGTGTGCGACTTCTCCATCGAGCTCTCGCAGGCCATGCTGGA";"A_33_P3629247";"ANKMY1";"NM_017844";"ref|Homo sapiens ankyrin repeat and MYND domain containing 1 (ANKMY1)	transcript variant 2	mRNA [NM_017844]";8	02221678222755;-0	317514776054175;-1	11946572481311;0	292422699020812;0	425202767813914;0	156095719687565
1236;8;88;1513;"TGCTGCCACAATGTTTATAAAGGCCAAATGATAGCGGGGGCTAAGTTGGTGCTTTTGAGA";"A_23_P98898";"CDK2";"NM_001798";"ref|Homo sapiens cyclin-dependent kinase 2 (CDK2)	transcript variant 1	mRNA [NM_001798]";8	88811521695763;-0	139429418112654;-1	80776990209392;0	104690170753991;0	192818778323228;0	707854893005153
1238;8;90;474;"TGACAACATCTTCAAGACACCCAAGGAGCTCTCCTGCACCCACGTCTTCTGCCTGGAGTG";"A_21_P0000163";"RNF223";"NM_001205252";"ref|Homo sapiens ring finger protein 223 (RNF223)	mRNA [NM_001205252]";7	47547708751886;-0	166315176945766;-0	606888078619274;0	559181012843273;0	677856656514831;0	248847210444303
1240;8;92;3120;"TCAGGGTTTGTTTTTAAGCCAGGACAAGAAGTGCAAATGCCTCTTTGAAGCAATTTAGGC";"A_32_P129950";"NHLRC3";"NM_001012754";"ref|Homo sapiens NHL repeat containing 3 (NHLRC3)	transcript variant 1	mRNA [NM_001012754]";9	16452996402336;0	10203888330228;1	19578990704632;0	262855028849716;0	392696138736483;0	144162246896346
1241;8;93;1679;"GTGTACCAAATAGATGGAAACTACTCCGGGAGCTCTCACGTGGTCCTGGACCATGAGACC";"A_23_P203488";"SMPD1";"NM_000543";"ref|Homo sapiens sphingomyelin phosphodiesterase 1	acid lysosomal (SMPD1)	transcript variant 1	mRNA [NM_000543]";9	36250679806108;-0	634787706834288;-5	85751486612033;0	000258427720488177;0	00120542166187992;0	44252101839674
1242;8;94;1711;"TTAGAGGTGTAAGCCCTTAAAAGGGCCAAGAATTTCTTTTTCCGGGAGCTCGGCTCTTAA";"A_33_P3429242";"LOC339988";"BC041468";"gb|Homo sapiens cDNA clone IMAGE:5217034. [BC041468]";6	17836111809922;-0	212643568176356;-0	483635357378969;0	640393882522039;0	744273561711831;0	273229447346118
1243;8;95;207;"AGAACCAGGGAATTACGTTTTAGTGGTTAGCGCTGCTTATTCTTCTGATGTACTGGCCCT";"A_21_P0005891";"XLOC_007189";"TCONS_00015146";"linc|BROAD Institute lincRNA (XLOC_007189)	lincRNA [TCONS_00015146]";6	16824538382699;-0	291093126731306;-0	662776218139814;0	524369293002991;0	647907641099033;0	237852660386931
1244;8;96;1302;"AGTCAGAAGAAAACATTTGAAATTAATCCCAGACACCCACTGATCAGAGACATGCTTTGA";"A_33_P3401252";"HSP90B3P";"NR_003130";"ref|Homo sapiens heat shock protein 90kDa beta (Grp94)	member 3	pseudogene (HSP90B3P)	non-coding RNA [NR_003130]";12	7425088541312;0	5214867961223;1	770429185258;0	111023212047239;0	201951668287838;0	741382544746051
1246;8;98;5654;"TGAGAGTGGTACCTCCTTACTTCTCCATTCCTCACTTCCATTTATTCCCAAACAATTGTG";"A_21_P0007679";"EFCAB4B";"BX648417";"linc|BROAD Institute lincRNA (XLOC_009982)	lincRNA [TCONS_00020677]";6	62504906786774;0	0557976000344897;0	361684166315364;0	726078505421468;0	811517307045806;0	297915224619769
1247;8;99;558;"CCACAGAGCAGACACAACTGCACTTCTCTGTAGAGCCTCCAGTCGATACTGAGAGCCACT";"A_19_P00321158";"ENST00000514376";"ENST00000514376";"Unknown";6	07558018358406;-0	707021970640078;-1	66466791776533;0	130931839693335;0	229837802821925;0	843755026039671
1250;8;102;1650;"AAACTAACCAAACAGGAAAAACTGGGAGATTTTCTGCAGAAATTGAGTTCCAGCCTCTCT";"A_23_P118406";"C17orf62";"NM_001033046";"ref|Homo sapiens chromosome 17 open reading frame 62 (C17orf62)	transcript variant 2	mRNA [NM_001033046]";9	66854159653991;-0	143107549112594;-2	73508345195608;0	0233956983677451;0	0562433567513849;0	206474367391561
1252;8;104;288;"CATCCTCCCATCTTTCATGCGTAATAAACGGGTCACAGACTTCCAGGGGAATGATTTTGA";"A_23_P114134";"SSX3";"NM_175711";"ref|Homo sapiens synovial sarcoma	X breakpoint 3 (SSX3)	transcript variant 2	mRNA [NM_175711]";7	47380945893507;0	705845719523169;11	8441245575191;1	00426193139438e-06;1	3288301378401e-05;4	8.78254e+07
1254;8;106;318;"TTTCTGTGTCTTTTTTGTTTGTAGTCTGTGATCCTGGGAGCCCTGGGGCCAGTTTAAACA";"A_21_P0001120";"XLOC_000776";"ENST00000448134";"gb|603042038F1 NIH_MGC_116 Homo sapiens cDNA clone IMAGE:5182593 5'	mRNA sequence [BI517791]";6	83511094982198;0	0931744822348399;0	440407459947961;0	670209587230953;0	767985774920488;0	281934411815705
1255;8;107;2336;"CTAAAACGTTTTACTTCTTACGTCCAAGAAAAAACTGCAGGAAAGCCTATTTTGTTCTAG";"A_33_P3271445";"COL4A3BP";"NM_001130105";"ref|Homo sapiens collagen	type IV	alpha 3 (Goodpasture antigen) binding protein (COL4A3BP)	transcript variant 3	mRNA [NM_001130105]";11	1409299321721;0	00219135212294574;0	018662729930693;0	985524414949199;0	991191888769384;0	363875362386272
1256;8;108;528;"GGATCCTCAGTACTTTTGGAGGGGTGTGAAGATATGTGTAAGTTATCTTCCTACTTTTCC";"A_33_P3282963";"TJP2";"ENST00000377259";"ens|tight junction protein 2 (zona occludens 2) [Source:HGNC Symbol;Acc:11828] [ENST00000377259]";6	55484461297788;0	292590738577115;1	45417475718012;0	180448180152558;0	295347257886644;0	108424606487371
1259;8;111;6978;"TCAGAAAGGGACTTCTCACTCATTGATGATCCTATGATGCCAGCTAACTCAGACTCCAGT";"A_24_P361167";"CHD8";"NM_020920";"ref|Homo sapiens chromodomain helicase DNA binding protein 8 (CHD8)	transcript variant 2	mRNA [NM_020920]";11	8502840846764;0	668376194962475;10	0123210632009;4	03934069082697e-06;3	96298729971988e-05;1	4.54848e+08
1262;8;114;370;"AAATGAGCCTTCATAGCAACTATCTGATGAGGAACTCACTGGCCTACCTTTCCTTGACAG";"A_19_P00321360";"XLOC_005747";"ENST00000506206";"Unknown";7	07037023046356;0	0769105848060585;0	472047143076963;0	648322837939915;0	749929148990167;0	275305663761657
1263;8;115;992;"GGTGCCAATATTTAACTGAACATCTGGTTTCTTTTTGGAAGTTTTCTTTCACATGGTTTG";"A_23_P39550";"TMEM163";"NM_030923";"ref|Homo sapiens transmembrane protein 163 (TMEM163)	mRNA [NM_030923]";7	74485222840811;1	91591555419921;24	2929372368948;2	10609574772493e-09;1	42084195307732e-07;5	216037
1267;8;119;0;"AGTACATCGAGAAATTAACAAAGGAGAGGGACGCTCTGAGTCTGGAACTGTACAGGAACA";"A_33_P3334738";"A_33_P3334738";"A_33_P3334738";"Unknown";6	53449833960087;-0	229175189088551;-0	478397699997937;0	643971721309865;0	746963558077766;0	274216968948708
1269;8;121;3099;"ACGCATATAAGATTGTAATTTTAAGATGTTTTGTGTCTCAGGGTGCTACATTCACTCTTG";"A_23_P433791";"C1orf124";"NM_001010984";"ref|Homo sapiens chromosome 1 open reading frame 124 (C1orf124)	transcript variant 2	mRNA [NM_001010984]";9	06659081635975;0	0248881027713228;0	271359698149081;0	792342036697469;0	860477107717328;0	315888803110033
1270;8;122;310;"TTTTTCTCGTGGGACACAAACCCCAACTGTACCCCCTATGGTTTCAGAACAGAGCTGTGC";"A_23_P420942";"ENST00000330439";"ENST00000330439";"ens|metallothionein 1E [Source:HGNC Symbol;Acc:7397] [ENST00000330439]";7	73797630717036;0	88756464462498;2	33942532283619;0	0445388021358324;0	0965063189888434;0	354283284523536
1271;8;123;2883;"TACTACTTCAGGTTTGGGGGTAGATGCTAGGAATACATCAGTGCTTGCTTGGGATCTTTG";"A_33_P3221808";"FAM205B";"AL080137";"gb|Homo sapiens mRNA; cDNA DKFZp434J193 (from clone DKFZp434J193). [AL080137]";6	27505742435282;0	194112918855221;1	23855687679235;0	24737571435723;0	375409124641154;0	137816030195234
1272;8;124;4328;"CCACCACAGGGTTAGGGGACAGGAAGCCTGTTCTATTCTCAATAAATCTTACAAAATTCC";"A_33_P3393170";"CAPN5";"NM_004055";"ref|Homo sapiens calpain 5 (CAPN5)	mRNA [NM_004055]";10	8630172833472;0	906533836978038;13	1413198375148;4	18987571332522e-07;6	69797319696004e-06;2	4.58886e+07
1274;8;126;908;"AGGATTGAAGCTTCGGCCTCCCTGGCCCTGGGTTAAAATAAAAGCTTTCTGGTGATCCTG";"A_33_P3325935";"PQBP1";"NM_001167989";"ref|Homo sapiens polyglutamine binding protein 1 (PQBP1)	transcript variant 8	mRNA [NM_001167989]";13	1281295358527;-0	386529327564602;-7	54263268978065;3	88615183710852e-05;0	000251977364735346;9	2.50313e+08
1275;8;127;1078;"TGGCCTCCCACTAACTAGCATTCCTTTAAAGAGACTGGGAAATGTTTTAAGCAAATCTAG";"A_23_P401076";"SUSD3";"NM_145006";"ref|Homo sapiens sushi domain containing 3 (SUSD3)	mRNA [NM_145006]";10	2447027447956;1	9044405684307;18	3977122056358;2	35519800766059e-08;7	87022553338711e-07;2	8.8923e+06
1276;8;128;89;"ATTAAGGTAAGGATCAAGACGAGATCACACTGGAAAAGGTGGGCCCTAAATCCAGTGAGA";"A_21_P0004077";"XLOC_004651";"ENST00000510150";"tc|Q7SE06_NEUCR (Q7SE06) Predicted protein	partial (8%) [THC2760686]";7	97977743790766;-5	50587339789308;-51	8678532067377;2	69392090833074e-12;1	60537731166821e-09;5	8934.83
1278;8;130;355;"ATGACAAACGTTACCTGACAGTTAAGGAGAGGAGCTGCTAAATGGGTCGTGTGTTTCTGA";"A_23_P59714";"MGC16142";"NR_026902";"ref|Homo sapiens uncharacterized protein MGC16142 (MGC16142)	non-coding RNA [NR_026902]";6	79191987192137;-0	0184139569695443;-0	0301314237149608;0	97663124760351;0	985471797800205;0	361775466091845
1279;8;131;474;"TTGTTTCAGAAGGTAATGAGAATTCGTTGCCAGGTCGTTAAACTTCGCTCCTTCCTGGAG";"A_33_P3316093";"ENST00000415226";"ENST00000415226";"Unknown";6	16384624666628;-0	0219082449112253;-0	0956168876308571;0	925956361107569;0	952649484343432;0	349726102755885
1281;8;133;2260;"TTTAACTTTGATTCCCTCATCTCCACACAGAATGTTGTTGGTTTGAACGTGGGGAACTTC";"A_32_P102062";"FOXO3";"NM_001455";"ref|Homo sapiens forkhead box O3 (FOXO3)	transcript variant 1	mRNA [NM_001455]";7	50343885693248;-0	268473677654963;-1	38641150582673;0	199572305636076;0	319291876074819;0	117214888892971
1282;8;134;2738;"TTCTATGGGTCTCTTGCTAGGGGGTAAGGATTTTTATTCTTGGGCTTATAGAGCCAGTTA";"A_23_P102965";"BCL2L13";"NM_015367";"ref|Homo sapiens BCL2-like 13 (apoptosis facilitator) (BCL2L13)	nuclear gene encoding mitochondrial protein	mRNA [NM_015367]";9	15716153509178;-0	286194766127954;-4	84603597056751;0	000960258266342804;0	00367499564127828;0	134912360148382
1283;8;135;366;"CAGGAGCATCACAATTTGAGAGCAGTGCTGCCAAGCTAAAGAGGAAGTATTGGTGGAAAA";"A_23_P105545";"VAMP1";"NM_016830";"ref|Homo sapiens vesicle-associated membrane protein 1 (synaptobrevin 1) (VAMP1)	transcript variant 3	mRNA [NM_016830]";5	81745540409585;0	0660021280507914;0	914623762968025;0	384647925692089;0	519755206750848;0	190806761386462
1285;8;137;335;"TCAGGATGGACAAGAGGAAACCCACAGCTCAGCTTCAGGCTTCTTATGTTTCTGAAAACA";"A_23_P56314";"UQCR11";"NM_006830";"ref|Homo sapiens ubiquinol-cytochrome c reductase	complex III subunit XI (UQCR11)	nuclear gene encoding mitochondrial protein	mRNA [NM_006830]";15	6934622154118;-0	620944692991053;-10	6258417125173;2	47644093974737e-06;2	68322792730877e-05;9	8.50368e+07
1287;8;139;12292;"CCCCATCCTCTTTAACTATAAAGCTAATTTGTGACCAAAGATGGCATCCTTCATACTGGA";"A_23_P133068";"ANK2";"NM_001148";"ref|Homo sapiens ankyrin 2	neuronal (ANK2)	transcript variant 1	mRNA [NM_001148]";6	50373498116931;-0	148132655077626;-0	898507691986006;0	392720256767626;0	527495528123475;0	193648302238806
1288;8;140;998;"CAGTCAGCATCTTTTGACCCCTGCCCCCCAACAATAATAGAATTTCAGGAGACAAGGAAA";"A_21_P0000033";"LOC100287718";"NM_001162435";"ref|Homo sapiens ankyrin repeat domain containing gene (LOC100287718)	mRNA [NM_001162435]";10	9602931092651;0	347819041545593;3	43014081698812;0	00770368384615594;0	0217441054441977;0	798245459624985
1289;8;141;416;"GATGCCTGTTATCTTGTTCAGTGCCTCTGATAAATTAATAAACTGGAATCTCACTCAACA";"A_21_P0001727";"XLOC_000814";"TCONS_00002376";"linc|BROAD Institute lincRNA (XLOC_000814)	lincRNA [TCONS_00002376]";6	17216328715521;-0	148046410639538;-0	709657705849749;0	49619942862777;0	623569091372047;0	228917762208074
1290;8;142;1181;"ATAATGCTACAAAGACATTTCGAGAATTTTGTGGACCTGCTGATCCTGAAATTGCCCGGC";"A_23_P46063";"NME7";"NM_013330";"ref|Homo sapiens non-metastatic cells 7	protein expressed in (nucleoside-diphosphate kinase) (NME7)	transcript variant 1	mRNA [NM_013330]";11	9695256037806;-0	334087397828975;-5	47553924374174;0	00041717751629203;0	00180926852753066;0	664198576046329
1291;8;143;5621;"AGACTGGAAGGAGAAGTCCGTTCACTCCTAAAGGATATAAGCCAGAAAGTTGCTGTGTAT";"A_23_P94030";"LAMB1";"NM_002291";"ref|Homo sapiens laminin	beta 1 (LAMB1)	mRNA [NM_002291]";12	7544215876467;-1	50583506544086;-26	935047846338;8	54579027523272e-10;7	37274882190319e-08;2	706602
1292;8;144;55;"CTTTCATGATCATCTGCTTTGAGGGATAAACATTGCTTGTCCCCTCCTCCAACTAAGGAA";"A_33_P3323607";"CCDC129";"ENST00000409717";"ens|coiled-coil domain containing 129 [Source:HGNC Symbol;Acc:27363] [ENST00000409717]";7	62261463230224;0	225448612961495;1	62811384514429;0	138538368847181;0	240500874440431;0	882900110793666
1295;8;147;723;"TAGGGGCCAAAGAGGCTTACACGATATCCCATACCTTTAATGCCTTTGGCCTTCCATTCT";"A_33_P3356910";"TCEAL6";"NM_001006938";"ref|Homo sapiens transcription elongation factor A (SII)-like 6 (TCEAL6)	mRNA [NM_001006938]";12	9520243249563;-0	80942464265306;-15	7062083073121;9	18506656158619e-08;2	11882037241465e-06;7	778378
1296;8;148;4130;"TGCGTTTTAATACTGAGTGTGCCTAAGTTGCCCCTTATTTTTTATTTTCCCTGTTGCGTT";"A_23_P49155";"CDH3";"NM_001793";"ref|Homo sapiens cadherin 3	type 1	P-cadherin (placental) (CDH3)	mRNA [NM_001793]";6	78081493179643;-0	198383622645467;-1	02439374673295;0	332851817634603;0	467226673565171;0	171523069434252
1297;8;149;1844;"CTTTTGAGGGGACCATGACATCTATATTTGCGCAGATCATTTCTGTAGCTCTGATCTTAA";"A_23_P10870";"DOLK";"NM_014908";"ref|Homo sapiens dolichol kinase (DOLK)	mRNA [NM_014908]";10	3077399807344;-0	476315226535144;-6	95096963829717;7	27852045153804e-05;0	000420809896030352;0	154483057366302
1299;8;151;395;"AGTCTGTGGTCGAGTCTCCTGCCACGTCACTTGCTATCATCCAACCTGTGTCATCTCCAC";"A_33_P3252441";"ENST00000440582";"ENST00000440582";"Unknown";6	78942692734814;0	033350840770761;0	207426239570586;0	840374483642517;0	894351247323284;0	328324301184925
1300;8;152;816;"TTCTACAACCTGTGCTTGACCAGCCTTAGCTCCCAACAGCAGCAGCGCACCTTGGACTGA";"A_33_P3240053";"UFSP1";"NM_001015072";"ref|Homo sapiens UFM1-specific peptidase 1 (non-functional) (UFSP1)	mRNA [NM_001015072]";8	04177928535467;-0	160470921322055;-1	46593279046208;0	1772974359682;0	291301515850948;0	106939378585448
1303;8;155;408;"AAAGCGATGGTCCTTGGTGTGCCACTTCCTGTTGAAGCTGCCTGTCTACCAGAATTAGCC";"A_21_P0001249";"XLOC_001287";"ENST00000441338";"gb|CR743846 NCI_CGAP_Co8 Homo sapiens cDNA clone IMAGp971M0781 ; IMAGE:1874535 5'	mRNA sequence [CR743846]";6	8329589896204;-0	0389993670777411;-0	241832888285254;0	814423843065083;0	87643912884441;0	321748603102187
1304;8;156;894;"CCTGAGACTATTTTAACTAGGATTGGTTATCACTCTTCTGTGATGCCTGCTTATGCCTGC";"A_23_P136683";"HLA-DQB1";"NM_001243961";"ref|Homo sapiens major histocompatibility complex	class II	DQ beta 1 (HLA-DQB1)	transcript variant 2	mRNA [NM_001243961]";6	56261299819922;0	163150575025639;1	73885820815155;0	116652896533089;0	209855221960801;0	770397193569089
1305;8;157;1949;"TTCCACTACCATGAGCCATATTTTCTGTATTACCAGCAAGATGTTTGGGTTTGTTTTTTG";"A_21_P0011035";"XLOC_l2_002886";"ENST00000537616";"tc|Q5TF36_HUMAN (Q5TF36) REV3-like	catalytic subunit of DNA polymerase zeta (Yeast)	partial (15%) [THC2506662]";7	112527507577;0	215830087685302;3	5769518380167;0	00613004005364951;0	0178568560628624;0	655541075807304
1306;8;158;0;"CAAAGCAGCCAAAGACTGTATCCTGCACCAGCCCTGTGGGCCGACACTCCTGTTGTATCT";"A_33_P3261953";"A_33_P3261953";"A_33_P3261953";"Unknown";6	33947389974874;-0	0181099585569564;-0	185098178629917;0	857327255343697;0	905508664854582;0	332420288443796
1307;8;159;1366;"GGTTCTGTACAGATTGATGCAATTATATTGCCTTTCCTGATTAAGTGTTCCTTACTCTGT";"A_23_P215819";"ZNF655";"NM_024061";"ref|Homo sapiens zinc finger protein 655 (ZNF655)	transcript variant 2	mRNA [NM_024061]";9	60981170966149;-0	0796685512323556;-1	19034456438181;0	264881353093091;0	394793801344178;0	144932317505466
1310;8;162;8453;"TCGTTCTGTGTTTGATATTTGTGTAAAGTATGCATGCAGTCTTGTACTGTGACCTAAGAA";"A_23_P120710";"TTC3";"NM_003316";"ref|Homo sapiens tetratricopeptide repeat domain 3 (TTC3)	transcript variant 1	mRNA [NM_003316]";10	5002467129606;0	0679229751329249;1	39034698165235;0	1984156371451;0	317924256627712;0	116712823624317
1312;8;164;988;"TCCTACGACTACTCCGGCTACGATGCCAGCTCGGGCAGGCCTTCCGAGAGGAACCTCTAT";"A_21_P0011530";"FAM108A1";"NM_031213";"ref|Homo sapiens family with sequence similarity 108	member A1 (FAM108A1)	transcript variant 1	mRNA [NM_031213]";9	60577369510722;-0	275240711098949;-2	84233359893737;0	0196632337822102;0	048454904719457;0	177882266934964
1313;9;1;1728;"GAATGTGGGAAGGCCTTTAGCTATCATTCAAGCTTCTCACACCATCAGAGAATTCATTCT";"A_33_P3269278";"ZNF461";"NM_153257";"ref|Homo sapiens zinc finger protein 461 (ZNF461)	mRNA [NM_153257]";7	92945343818654;-0	650517518464707;-10	6022686114246;2	52228352945088e-06;2	72281395430155e-05;9	9.95692e+07
1314;9;2;2578;"CTCACCACTCTTCCCCTTGCAGTGGAGGAGAGAGCCAGAGTGGATACTATTTTTTATTAA";"A_23_P12173";"CRTC2";"NM_181715";"ref|Homo sapiens CREB regulated transcription coactivator 2 (CRTC2)	mRNA [NM_181715]";12	5273922253024;-0	0152124226741712;-0	282962517603687;0	783716954107637;0	854103409409925;0	313548961745687
1315;9;3;787;"TTCAGTTGTCCAGTGACAAGGCTTGCTGCATACACACCACTTTGTTTGTTTCTCATACCT";"A_33_P3324137";"PRO0628";"BC015320";"gb|Homo sapiens	clone IMAGE:4399587	mRNA. [BC015320]";8	82452534606544;0	119405618974309;0	849219470016925;0	418153126755755;0	552130531986788;0	202692031369076
1316;9;4;0;"TGAAGAGTGTTCATTGAGCCAGCATAACTCCAGATTCTCTCCTCTCTCAGACTCACCTTT";"A_33_P3267150";"A_33_P3267150";"A_33_P3267150";"Unknown";6	89630832161564;-0	204332682320171;-0	653351990694981;0	530146896721171;0	653469457865219;0	239894452813052
1318;9;6;484;"GGCAGGTGTCAGAGGCAGAGGAAAATGGGAAATTGGATATGAAAGAAATACACACCTACA";"A_33_P3336484";"NPIP";"NM_006985";"ref|Homo sapiens nuclear pore complex interacting protein (NPIP)	mRNA [NM_006985]";9	52744656290969;-0	338596367224566;-6	75340677297158;9	05335991220963e-05;0	000502132233669262;0	184337211151999
1320;9;8;2012;"TACAGTGTAGCTTTCAGCCCCGATGGAAAGTACTTGGCTAGTGGATCCTTTGACAAGTAT";"A_23_P114466";"TBL1Y";"NM_033284";"ref|Homo sapiens transducin (beta)-like 1	Y-linked (TBL1Y)	transcript variant 1	mRNA [NM_033284]";9	05948433905963;-0	659722113709675;-10	4955864613559;2	74181202203519e-06;2	91193105178522e-05;1	6.89958e+07
1322;9;10;574;"CTCTTCATGTGGATGTCTGAGCTCATATCAGGTGTCTGAAAGAGGCAGATTCTGAGGATT";"A_19_P00318272";"LOC100287765";"NR_038988";"ref|Homo sapiens uncharacterized LOC100287765 (LOC100287765)	non-coding RNA [NR_038988]";6	62260273557048;-0	764792802425892;-2	64565414509918;0	0270545512643317;0	0636321780212099;0	233599387759747
1324;9;12;4164;"GGTTTTTCTTAGTTCTTCTGCTTTTGCAATTGTGTTTGTGAAATTTGAATACTTGCAGGC";"A_24_P365767";"CYBB";"NM_000397";"ref|Homo sapiens cytochrome b-245	beta polypeptide (CYBB)	mRNA [NM_000397]";6	66224308810132;-0	397671000491352;-6	11366535160897;0	000189498280682431;0	000926052342044137;0	33996205514588
1325;9;13;1378;"ATTTGCCTCACCTTGGGGCCTTGATGACTGCCTTGCCTCCTCAGTATGTGGGGGCTTCAT";"A_23_P98431";"HMBS";"NM_000190";"ref|Homo sapiens hydroxymethylbilane synthase (HMBS)	transcript variant 1	mRNA [NM_000190]";13	9009457711744;0	201420604441912;3	83322455858422;0	00414038486231705;0	0127830360615334;0	469276628671996
1326;9;14;681;"AGAGAGCAACACCAAAAACCCATGGCCAATAATGGAGAGCCAAATCAGGTGACAAGTTAC";"A_21_P0006294";"XLOC_007775";"TCONS_00016405";"linc|BROAD Institute lincRNA (XLOC_007775)	lincRNA [TCONS_00016405]";6	25481659147198;0	118738492253087;0	691435620504905;0	507034718542978;0	63277994146669;0	232299147239619
1328;9;16;1321;"AGCAGCCAGTTGGTGTGTCTCAGAAAATCCCGCTCAGTTCCGAGGCCTCCTAGATGTGGA";"A_24_P842172";"LOC349196";"NR_027000";"ref|Homo sapiens uncharacterized LOC349196 (LOC349196)	non-coding RNA [NR_027000]";6	2013632941071;0	113830480186284;0	50449300130393;0	626244126592085;0	733112735775521;0	269132208831437
1329;9;17;7889;"TTTGAAGACACTAATACCGTGCTATTTCAGATATGGGTGAGGAAGCAGAGCTCTCGGTAC";"A_33_P3409099";"ATXN1";"NM_000332";"ref|Homo sapiens ataxin 1 (ATXN1)	transcript variant 1	mRNA [NM_000332]";8	2054035034296;-0	29153070471774;-2	12800001444744;0	0627554912806639;0	1278061218042;0	469187645839459
1333;9;21;2431;"GTCAGGATGCTGTCTTCCCACGAATAGTACTCAGTAACAAACCAATTGCATTTTAGTTGG";"A_23_P164141";"PSME3";"NM_176863";"ref|Homo sapiens proteasome (prosome	macropain) activator subunit 3 (PA28 gamma; Ki) (PSME3)	transcript variant 2	mRNA [NM_176863]";11	2198529369786;0	180165565999745;2	43822272916732;0	0379228000677104;0	0843836057377209;0	309779725451501
1334;9;22;5201;"CTAATGGCAGAAAAAGAAGTTGAGCAATTTCTATGTAATGTACAGATACTAGCATTGCAC";"A_23_P10980";"LPHN3";"NM_015236";"ref|Homo sapiens latrophilin 3 (LPHN3)	mRNA [NM_015236]";5	82726098807567;1	21148903744379;16	3792342332103;6	40905992075725e-08;1	62767410775314e-06;5	9.75336e+06
1335;9;23;1019;"TATCTGTGCCATGACGAGCCCTACACATTTGACATCAACCTCTCTGTTAACCTGAAAGGA";"A_23_P129221";"FAH";"NM_000137";"ref|Homo sapiens fumarylacetoacetate hydrolase (fumarylacetoacetase) (FAH)	mRNA [NM_000137]";10	5004873521427;-0	111202609131691;-1	20535252079603;0	259327059432755;0	388616222992739;0	142664473522107
1336;9;24;330;"AAATGGCTTTCTCTTCATTCATTTCTACATCTTCATTCATTCTCCCAGGTCTTGCAATGG";"A_21_P0008291";"XLOC_010987";"BC034639";"tc|Q91809_XENLA (Q91809) Maternal transcription factor	partial (3%) [THC2623399]";6	39317323824265;0	127937117059521;0	733413164801059;0	482294121884559;0	611032474104138;0	224315458453226
1339;9;27;151;"CAAGACATGTGACCAAGCCTAACATCAACTGGGTGAAGAGCTATATGTTCCTTTCTCAAG";"A_21_P0007065";"XLOC_008501";"ENST00000433152";"gb|DA381152 BRTHA2 Homo sapiens cDNA clone BRTHA2014635 5'	mRNA sequence [DA381152]";6	09738954568572;0	637752178021792;1	31991771375183;0	220004429296022;0	344127863449471;0	126332400858684
1345;9;33;2494;"TCACAGGACATTAGTGATGCCTGTGAAGCAGAAAGTACAGAGAGGTGTGAGATGTCAGAA";"A_33_P3358641";"LRRFIP1";"NM_001137552";"ref|Homo sapiens leucine rich repeat (in FLII) interacting protein 1 (LRRFIP1)	transcript variant 3	mRNA [NM_001137552]";9	06182482696497;-0	182809235609579;-1	92138682455377;0	0874367339553726;0	166936463879198;0	612838613570002
1347;9;35;0;"TCTTCTGCTTTCTTCTGCACAGGGAGTTGTGAGGTTGCTACACCCCCGGGTCTGGATTCC";"A_33_P3320283";"A_33_P3320283";"A_33_P3320283";"Unknown";6	81530661093018;0	172574722988363;1	0910058200467;0	304100689887938;0	437528114863821;0	160620464265418
1348;9;36;2434;"TTCAGCAGCCCTCGGTTGATAGAAAGCACAGGAGATACCTTATGACACAGCCAACATTTT";"A_23_P14464";"EXOC5";"NM_006544";"ref|Homo sapiens exocyst complex component 5 (EXOC5)	mRNA [NM_006544]";8	66215292790559;0	239484633180084;3	74451394600401;0	00473821261233014;0	0143358106303859;0	526280364815042
1349;9;37;134;"TGACAAAGATACAAATCTCTTAAGGAGGTGGACCCCAAGTTCCCGAGGAACATACGCTTT";"A_21_P0013477";"XLOC_l2_014197";"THC2513598";"tc|Q5T1D1_HUMAN (Q5T1D1) OTTHUMP00000017090 (Fragment)	partial (95%) [THC2513598]";11	769670802142;0	175862488093928;3	34189424492531;0	00884849665618664;0	0245110288711445;0	899821680746544
1350;9;38;446;"TTGTCTTTTAAATTAAGCCTCGGTTGAGCCCTTGTATATTAAATAAATGCATTTTTGTCC";"A_24_P297539";"UBE2C";"NM_181803";"ref|Homo sapiens ubiquitin-conjugating enzyme E2C (UBE2C)	transcript variant 6	mRNA [NM_181803]";14	4592945304206;0	195521837087483;3	48393512823643;0	00708284492145419;0	0202474859707201;0	743303227002183
1352;9;40;1711;"TTTTTTCTTTAAAAAAGCGGTTTCTACCTCTCTATGTGCCTGAGTGATGATACAATCGCT";"A_23_P120243";"HOXD1";"NM_024501";"ref|Homo sapiens homeobox D1 (HOXD1)	mRNA [NM_024501]";8	23383602476664;0	0330353229249898;0	575627614244873;0	579216785045408;0	694844217810297;0	255083495357934
1354;9;42;1982;"CTGGAGTATACACCAACTGCCCGACTAACACCACTGGAAGCTTGTGCACATTCATTTTTT";"A_23_P251342";"GSK3B";"NM_002093";"ref|Homo sapiens glycogen synthase kinase 3 beta (GSK3B)	transcript variant 1	mRNA [NM_002093]";9	99040114178909;0	534490225921477;9	03777213527593;9	28432564096317e-06;7	85409040815444e-05;2	8.83306e+08
1355;9;43;220;"AAGGAAGCAAGTTTATTGGAATCTACTCCGTTAGAGAGTGCAAGTCCTCAGACTGCAGGA";"A_33_P3299811";"FLVCR1-AS1";"NR_027286";"ref|Homo sapiens FLVCR1 antisense RNA 1 (non-protein coding) (FLVCR1-AS1)	transcript variant 2	non-coding RNA [NR_027286]";7	49850478417728;-0	163240879554374;-2	05152559101349;0	0709888795093955;0	141362756349774;0	518955257579435
1357;9;45;1393;"GTGGCTGCGGCCAAGCCAGGCGGTCTGTCCTGCAGCAGCTGCAAGGGGGCGGGACGCGGC";"A_33_P3326898";"LOC100132249";"XR_133519";"ref|PREDICTED: Homo sapiens hypothetical LOC100132249 (LOC100132249)	partial miscRNA [XR_133519]";7	28328636436497;0	38040049608353;1	07685403050659;0	310041825229453;0	443625875317199;0	162859006388147
1358;9;46;4539;"GAAGACAACAGCTAACGAACAACATACGTGTGATAATTTATGTAGTTGAACCTCTAAGGC";"A_33_P3405168";"MMAA";"NM_172250";"ref|Homo sapiens methylmalonic aciduria (cobalamin deficiency) cblA type (MMAA)	nuclear gene encoding mitochondrial protein	mRNA [NM_172250]";7	80791451048579;0	374824308489823;0	979597463494022;0	353320284334132;0	488624750289848;0	179378493808465
1359;9;47;82;"AAAGGTCCTGGGGTATTCCTGGATCTTCAGGACATCTGCCTACCCTCAGGTTTCCCAGGC";"A_33_P3383205";"OK/SW-CL.58";"AB064667";"gb|Homo sapiens mRNA for OK/SW-CL.58	complete cds. [AB064667]";6	22257472451379;0	0542581852860744;0	407130382127262;0	693589755221058;0	786550023514963;0	288749512666793
1362;9;50;5481;"CATGGAGATGGCTACGGAGTGAATCATGGCGGGCATTATGGACATGGAGGAGGCCACTGA";"A_33_P3214914";"MUC22";"NM_001198815";"ref|Homo sapiens mucin 22 (MUC22)	mRNA [NM_001198815]";6	23842205790719;-0	521534597121488;-1	22568155150179;0	251955198317665;0	38060859533641;0	139724802154418
1363;9;51;1089;"CTATCGTACAGAACCTGCTAAGGCCATCAAACCTATTGATCGGAAGTCAGTCCATCAGAT";"A_24_P6911";"DTX2P1-UPK3BP1-PMS2P11";"NR_023383";"ref|Homo sapiens DTX2P1-UPK3BP1-PMS2P11 readthrough (non-protein coding) (DTX2P1-UPK3BP1-PMS2P11)	non-coding RNA [NR_023383]";10	0379269948973;-0	444867773631785;-7	33756378224903;4	80969933829542e-05;0	000298853301228706;0	109711706196407
1364;9;52;2724;"CCGGACACGGATCACTTTTGTCTGATTCCAGCCTGCTTGCAACCCTGGGGTCCTCTTGTT";"A_23_P93690";"MCM7";"NM_182776";"ref|Homo sapiens minichromosome maintenance complex component 7 (MCM7)	transcript variant 2	mRNA [NM_182776]";15	1303185215079;-0	351717625069927;-5	58634095359809;0	000362327487262904;0	00160601908266119;0	589583896240474
1366;9;54;595;"TCCGATGGTTCTTTTAAAGCAGTAGTATATCTTATTTTCAAGGCATTTGGAAATGAAGGG";"A_23_P121676";"CXXC4";"NM_025212";"ref|Homo sapiens CXXC finger protein 4 (CXXC4)	mRNA [NM_025212]";7	29627898818046;0	427519897278922;6	42220044156972;0	000131875869150396;0	000685694856884756;0	251724683547521
1367;9;55;4586;"ATGGCTGTTCCCCAAGTGCACACCTGAACACTTGGAGGAATAAAGTTCTGTTTTTAATTG";"A_23_P20722";"SNAPC4";"NM_003086";"ref|Homo sapiens small nuclear RNA activating complex	polypeptide 4	190kDa (SNAPC4)	mRNA [NM_003086]";12	1679871342381;-0	359475466270402;-6	67969793134893;9	83267116096271e-05;0	000537755536981271;0	197414842788137
1369;9;57;4355;"TGGGAACTGAGTTGTTGGCCTTTGTGAAATGAAATTTTTGGCTCTTGAGAAAGAATTCTT";"A_23_P112201";"KDM4C";"NM_015061";"ref|Homo sapiens lysine (K)-specific demethylase 4C (KDM4C)	transcript variant 1	mRNA [NM_015061]";8	21056566013168;-0	121645909979996;-1	94876756659209;0	0837000094200486;0	161324047863989;0	592234934963104
1371;9;59;1687;"ATTTTCACCAACTTATTACTTGAAATTATAATATAGCCTGTCCGTTTGCTGTTTCCAGGC";"A_23_P108641";"FAM136A";"NM_032822";"ref|Homo sapiens family with sequence similarity 136	member A (FAM136A)	mRNA [NM_032822]";12	7147242746648;0	369945358904358;7	51533016693913;3	99703332641791e-05;0	000257403506992452;9	4.49512e+06
1372;9;60;484;"ACAAAGTAACCTGGAAAACTATGGCAATTAATCAGAGGAAATCCGTACCCCTCCCTCTCC";"A_33_P3223397";"ENST00000553174";"ENST00000553174";"tc|DHH_HUMAN (O43323) Desert hedgehog protein precursor (DHH) (HHG-3) [Contains: Desert hedgehog protein N-product; Desert hedgehog protein C-product]	partial (19%) [THC2641433]";7	04806802215685;0	0686333839398507;0	801481266423598;0	443853197810761;0	576237378688436;0	211541869305546
1373;9;61;5231;"TCGGGTTCCTGCGCTGACACCTGGTCTGTGCACCTGTGTTGCTCACAGTTGAAAACTGGA";"A_32_P8251";"PHRF1";"NM_020901";"ref|Homo sapiens PHD and ring finger domains 1 (PHRF1)	mRNA [NM_020901]";14	2432573960254;-0	11838235035264;-2	34493902619463;0	0441411302376609;0	09578297849278;0	351627837196778
1374;9;62;1016;"CTCTCCACTTCTATGGATAAAACTTTCAAGGTATGGAACGCCGTGGACTCCGGGCACTGC";"A_23_P84202";"WDR25";"NM_024515";"ref|Homo sapiens WD repeat domain 25 (WDR25)	transcript variant 1	mRNA [NM_024515]";6	33051223544303;0	19259758382192;1	32159604278616;0	219467698632542;0	343505376556187;0	126103880381024
1375;9;63;936;"GCTTGAGACCCTGTCATTTCCATCAAGCTTGAAAATATACATCTTAATAAACTGCAATAC";"A_21_P0001875";"XLOC_001515";"ENST00000433065";"tc|Q588E3_BRALA (Q588E3) NADH dehydrogenase subunit 5	partial (4%) [THC2710260]";6	7933147116144;-0	138195404669331;-0	370134747391178;0	719990771328886;0	806927281070023;0	296230185240185
1378;9;66;424;"GTGCGAAACGGAGGACCTTTGTAACGCCACGTGTTTGCTCTTTTTGAAAAAACAAGAATA";"A_32_P101699";"LOC729887";"BC052334";"gb|Homo sapiens cDNA clone IMAGE:6176570	partial cds. [BC052334]";10	6109994900151;-1	08253318951612;-17	9440629646433;2	92178819939654e-08;9	20892695950838e-07;3	380679
1380;9;68;797;"CCTGGAGGACCCTAGCCATTCTGGTTAACCTGCAGGGAACGGTGGTCTTTCTCTTATCTT";"A_33_P3361412";"SLC22A15";"NM_018420";"ref|Homo sapiens solute carrier family 22	member 15 (SLC22A15)	mRNA [NM_018420]";6	1871336495052;-0	322003896161222;-0	756078881022881;0	469261467988242;0	599643967750532;0	220134636431365
1382;9;70;2254;"GGGGTAGCAGTTCAACAATTCACTTACGAATGTTTATAAGCTTTCCATTTCCTAGGTAAT";"A_23_P211785";"ZNF35";"NM_003420";"ref|Homo sapiens zinc finger protein 35 (ZNF35)	mRNA [NM_003420]";7	64592840093741;0	265328449435729;2	8116715559687;0	0206637074232402;0	0505863906336912;0	185707141394199
1383;9;71;190;"CAAAGGGACATAGTTTTGGATGTCAGCAGTGCAAACAGTGAAGATTGATGAATAAAATGA";"A_33_P3347387";"THC2759738";"THC2759738";"tc|Q32NC8_HUMAN (Q32NC8) P18SRP protein	partial (73%) [THC2759738]";9	07459964563246;-0	328738044296038;-4	76972589531134;0	00106649819446778;0	00401966642047003;0	147565531154258
1385;9;73;3612;"GGAGGTGGGTTTTATTTCGTGTGCACAAAGTTTTAAAAAATACATGTGCACCATTAAAAG";"A_33_P3436646";"LOC151657";"AK091114";"gb|Homo sapiens cDNA FLJ33795 fis	clone CTONG1000097. [AK091114]";6	77117741804135;0	0514850075141737;0	16027681778048;0	876264077341868;0	919166112812482;0	337434059118537
1386;9;74;8549;"TGGCAGTATTGTAGCTGATCGGGAAATGTTTGATATCTCAGCAATTTTGCATTTTTGTGT";"A_23_P54556";"MKL2";"NM_014048";"ref|Homo sapiens MKL/myocardin-like 2 (MKL2)	mRNA [NM_014048]";10	2778487355485;-0	459987167449606;-7	72646613121935;3	22194274913064e-05;0	000215734743377079;7	9.19814e+08
1389;9;77;617;"CAGTCTCTTCTGATTAAAGAGATCTGTTCTGGGTGTTGACCACTCCAGAGAAGTTTCGAG";"A_23_P213336";"FGF1";"NM_000800";"ref|Homo sapiens fibroblast growth factor 1 (acidic) (FGF1)	transcript variant 1	mRNA [NM_000800]";8	04559962812838;-0	730168840345284;-5	90460198798152;0	000243944607343872;0	00114701014966771;0	421077632494809
1390;9;78;2500;"GGCACATTCTCAGGCCTCCCTGGAGACCACTGGGGAGCTGTCCAGCCCCCTCCCAACCCC";"A_33_P3271171";"CNOT3";"ENST00000358389";"ens|CCR4-NOT transcription complex	subunit 3 [Source:HGNC Symbol;Acc:7879] [ENST00000358389]";8	57892672677966;0	257252955693748;1	99420384868936;0	0778321294380206;0	152366898514121;0	559352442657019
1391;9;79;2871;"TTGCAACGACTCTCTGAGGTAGAAAATATTGTTAATTCCGTTCAGGATCCCGGCTACATA";"A_23_P130027";"EPN3";"NM_017957";"ref|Homo sapiens epsin 3 (EPN3)	mRNA [NM_017957]";6	04543808534023;-1	07006550758537;-8	97976455086616;9	77849603682201e-06;8	19244994701724e-05;3	752128
1394;9;82;2663;"TTAATCATGTTTGAATGTTAGGGGTTGGATCCTAGAGTAGATGCCTGAGGCCACATCTGA";"A_23_P117424";"DCAF11";"NM_025230";"ref|Homo sapiens DDB1 and CUL4 associated factor 11 (DCAF11)	transcript variant 1	mRNA [NM_025230]";9	30341762940454;1	14068220234341;17	1709916121158;4	27073528436845e-08;1	20660457814729e-06;4	4.29553e+06
1395;9;83;371;"TGCAATTATTTCTGAACCTTCCCATCAGCCTTGTCTCTGATAGAATTGGCCTGTTGTGGA";"A_21_P0013414";"XLOC_l2_013730";"ENST00000451792";"gb|K-EST0137396 S22SNU16n1 Homo sapiens cDNA clone S22SNU16n1-148-A10 5'	mRNA sequence [BQ082573]";7	61009086352564;-1	22376540423429;-6	22347032736805;0	000166332327332439;0	000832308240329325;0	305547761234129
1397;9;85;454;"GGCTGTGCAGCCAAAATTTGCAATTCTTCCCCCAGCTTTTAAAATTGTAGTAAAATATAT";"A_21_P0006685";"XLOC_008512";"ENST00000441348";"linc|BROAD Institute lincRNA (XLOC_008512)	lincRNA [TCONS_00017841]";6	37076986100239;-0	0649199862047629;-0	661844110710916;0	524939033765955;0	648412245894474;0	238037905297511
1400;9;88;1710;"AGACGGGGGAGGCTTACCACTTTCCCCAAACAACATAAAAGACAATGTCCCTTCTTCAAA";"A_23_P205575";"GPR135";"NM_022571";"ref|Homo sapiens G protein-coupled receptor 135 (GPR135)	mRNA [NM_022571]";9	83944045698026;1	14522781983443;21	1560262567487;7	01988572041442e-09;3	40723864981804e-07;1	2.50828e+06
1402;9;90;1190;"CCCTGGCTCGAAATAAGAGCCTCAACCTCAAACACATTAAACACTTTATTTTGGATGAAT";"A_24_P904903";"DDX39B";"NM_004640";"ref|Homo sapiens DEAD (Asp-Glu-Ala-Asp) box polypeptide 39B (DDX39B)	transcript variant 1	mRNA [NM_004640]";9	18768112771228;0	337535657300107;3	7435637670234;0	0047450891175697;0	0143497778966651;0	526793115588782
1404;9;92;2282;"CTGATGTGCCATTTGTATTAAGTTATCTTTGTCATTTTAAAGACATGAATTCCCCAAGCC";"A_33_P3612740";"USP48";"NM_001032730";"ref|Homo sapiens ubiquitin specific peptidase 48 (USP48)	transcript variant 2	mRNA [NM_001032730]";9	48751512762407;-0	388304122087503;-2	74245253827288;0	0231175643640824;0	055653715959914;0	204309743577493
1406;9;94;3327;"ACAGCTATTCCCATATTCTAGGAGTGGCCTAAGAAATGCGTGTTTCAGTGACTAGATTAT";"A_23_P202496";"NOC3L";"NM_022451";"ref|Homo sapiens nucleolar complex associated 3 homolog (S. cerevisiae) (NOC3L)	mRNA [NM_022451]";11	3997292843743;-0	376803703082942;-5	891250826198;0	000247959294178479;0	00116330108523839;0	42705817990602
1409;9;97;1246;"ATGCCTGGCCTAAAGGGCTTCGTGGATGAGCACACCATCAACATCTCCCTCAGTCTGCAC";"A_33_P3391105";"LRP1";"NM_002332";"ref|Homo sapiens low density lipoprotein receptor-related protein 1 (LRP1)	mRNA [NM_002332]";7	61599981301284;0	176625809067388;0	615474329613223;0	553747746485075;0	673301688275135;0	247175041071594
1410;9;98;1259;"CTGCCTGCTCTTCAGGTAGAAAGCCCTGGTTGAACAATAAACGCATGACTCTCCCTGAAT";"A_33_P3395859";"LOC147646";"NM_001193623";"ref|Homo sapiens uncharacterized LOC147646 (LOC147646)	mRNA [NM_001193623]";7	02815619130009;0	336364355477214;1	92318628228329;0	0871863795897187;0	166567186843811;0	611482964713357
1411;9;99;440;"TTCCATAAGCGTGGCAAGAAAAATGGGAAGTTCTCGGTAAGGTATATAGTATTATTTCTA";"A_21_P0010936";"XLOC_l2_001875";"ENST00000414939";"Unknown";7	19093583215945;0	112437573810729;0	906109077511378;0	388897855584002;0	524199254112976;0	192438210717997
1413;9;101;1309;"TGTTTGAGGATGACCTGCGTTTTGAGATCTTCTTCAAGAGACGTCTGATGAACCTCATGC";"A_33_P3245575";"GLT25D1";"NM_024656";"ref|Homo sapiens glycosyltransferase 25 domain containing 1 (GLT25D1)	mRNA [NM_024656]";8	16048137249533;-0	336548469061109;-0	771155299459696;0	460720653230928;0	591478122595199;0	21713688201191
1415;9;103;620;"CCAGCACTGTGAAGCCTACAAAAACATTGATGCGCTGGCTTGGGGATTTGAATTTGAACA";"A_23_P1014";"LINC00467";"NR_026761";"ref|Homo sapiens long intergenic non-protein coding RNA 467 (LINC00467)	non-coding RNA [NR_026761]";9	78161507997641;0	422019812042798;7	1100912477025;6	12517464284604e-05;0	000363973971519773;0	133618083729842
1416;9;104;643;"AAACGGGCTGTGGAAAAAGAGAATGCATGGCCAAAAATGGTGGTGCTCTCTGTCCAAAAA";"A_21_P0013162";"LOC729178";"NR_034115";"ref|Homo sapiens uncharacterized LOC729178 (LOC729178)	non-coding RNA [NR_034115]";6	66392858386423;0	541677389691184;2	04680589641269;0	0715297696192968;0	142194253782813;0	522007758646063
1417;9;105;4948;"TTCCTTGTTTACTGGTTTGACTATAATTCTCTGTTATCTTTACGAGGTAAAACTGCAAGC";"A_24_P921366";"CALD1";"NM_033138";"ref|Homo sapiens caldesmon 1 (CALD1)	transcript variant 1	mRNA [NM_033138]";12	0511984449568;-0	643956317001848;-5	20839583826793;0	000590172066303166;0	00242458024941094;0	890084984436621
1418;9;106;3877;"GCTGGGAGGCAGGTTTTGTACGGTACGTTGTTATTGATATGATATAAAACATCAAACGTC";"A_33_P3367855";"PIK3R2";"NM_005027";"ref|Homo sapiens phosphoinositide-3-kinase	regulatory subunit 2 (beta) (PIK3R2)	mRNA [NM_005027]";14	4948146901961;0	504609030656388;7	62101574483792;3	58615048072633e-05;0	000235803683019562;8	6.56563e+08
1419;9;107;756;"ATTCTAATGGGCCTAATTGGCGCCTAGGGTTATCTCTCCCCATATTTCTGCGTTGTTTCA";"A_33_P3789327";"SNORD12B";"AV755695";"gb|AV755695 BM Homo sapiens cDNA clone BMFBHD10 5'	mRNA sequence [AV755695]";6	23988237253133;-0	0671148267936932;-0	279307481743546;0	786430655076669;0	856274945612039;0	314346152008674
1421;9;109;113;"AATTTTGAGTTTCACATTTAACCTTGCAGTTTTATCCCTGGGGAGCTTCTGCCTGGATGG";"A_21_P0005136";"XLOC_005479";"THC2784169";"linc|BROAD Institute lincRNA (XLOC_005479)	lincRNA [TCONS_00012608]";6	11225203866959;0	0687234731964637;0	31671028969014;0	758811500207004;0	836022445698457;0	306911279075612
1422;9;110;746;"TGTGTGATGGTGCAAGGAATGGATTCAGGATGTTGTTGGAGAAACAAGTTTGTGATTAGT";"A_23_P118246";"GINS2";"NM_016095";"ref|Homo sapiens GINS complex subunit 2 (Psf2 homolog) (GINS2)	mRNA [NM_016095]";11	4216129271769;-0	774952473559207;-12	6538128158625;5	76411392490799e-07;8	62339312429285e-06;3	1.65724e+07
1423;9;111;508;"TGTCTGCTCTAAGTCCGTCTGCTATGTGCCTGTGTGCTCTGGGGCTTCCACTTCATGCTG";"A_24_P134789";"KRTAP10-10";"NM_181688";"ref|Homo sapiens keratin associated protein 10-10 (KRTAP10-10)	mRNA [NM_181688]";8	95475960727344;0	100045009435759;0	768758398583557;0	462071633090077;0	592810475335433;0	217626000558653
1424;9;112;1582;"AAGAAGATTCCCACCCCTGCCTCCCATGCCTGGTCCCAAGACAGTGAGACAGTCTGGAAA";"A_33_P3350748";"KRT7";"NM_005556";"ref|Homo sapiens keratin 7 (KRT7)	mRNA [NM_005556]";15	359569628208;-1	81216346478293;-34	1071720326424;1	07879026713777e-10;1	68150511897555e-08;6	17295.5
1426;9;114;1098;"TCGAGGGGACTTTCAGTCACAGGATTTCATAATTGTCATTGTCACACTTTCAAATTTTTG";"A_23_P380917";"SEC11A";"NM_014300";"ref|Homo sapiens SEC11 homolog A (S. cerevisiae) (SEC11A)	mRNA [NM_014300]";13	9877851755448;-0	15267377369258;-2	63364865819456;0	0275880142758099;0	0646334673724205;0	237275210066743
1428;9;116;1101;"ACAGAAGAATTTGTGTGGAAGCAGGATGTAACAGATACACCGTAAAGGCATCTTAAAGCC";"A_23_P145146";"PDCD2";"NM_002598";"ref|Homo sapiens programmed cell death 2 (PDCD2)	transcript variant 1	mRNA [NM_002598]";12	6694656249041;0	0800934690258028;1	50718917417661;0	166620506347425;0	277571460074553;0	101898952934444
1429;9;117;2620;"AAGAAAAGCCCCTGGCAGAAACGGGAGGAGAGGCCCCTGATGGCGTTTAACATTAAATGA";"A_33_P3298430";"FAM171A1";"NM_001010924";"ref|Homo sapiens family with sequence similarity 171	member A1 (FAM171A1)	mRNA [NM_001010924]";7	81214368328065;-0	0588491534994615;-0	456342108065219;0	659143850232228;0	758872637847415;0	278588898103867
1430;9;118;331;"ATGTTATGGGACATCATCCCTTCTGGTGGCTCGAGCTCCCTGGCATTCTGGGTCCTCACT";"A_21_P0010376";"XLOC_014338";"ENST00000416352";"linc|BROAD Institute lincRNA (XLOC_014338)	lincRNA [TCONS_00029466]";6	88639034186058;-0	120471806469688;-1	21350330206296;0	256350491888895;0	385412017799693;0	14148818128345
1431;9;119;956;"CGACTACAGAGCCTTTGGCCGCCTCATGGTGGAGAGCCACCGCTCACTCAGAGACGACTA";"A_23_P141126";"GALK1";"NM_000154";"ref|Homo sapiens galactokinase 1 (GALK1)	mRNA [NM_000154]";9	45907165223132;-0	028378117844138;-0	365566556563765;0	723279098758193;0	809400521562062;0	297138133832688
1432;9;120;254;"AACCAGTACGATAGCAAGGACACATGAGAATCTGTTAATACAAGCACATGCGATGGCGCA";"A_33_P3403937";"LOC100129399";"AK124011";"gb|Homo sapiens cDNA FLJ42017 fis	clone SPLEN2033153. [AK124011]";6	30529044918261;0	415808818379626;1	32609397167591;0	218034705639495;0	3419110583051;0	125518591964173
1433;9;121;553;"GTCAACATTGGGCAAAAGGACTGGCCTCATCTACATTACAGATATCCTTGTGATGGTCTG";"A_21_P0007119";"FLJ37035";"NR_033847";"ref|Homo sapiens uncharacterized LOC399821 (FLJ37035)	non-coding RNA [NR_033847]";8	78232745305895;-0	262916651385545;-3	59769002742538;0	00593658738553556;0	0173814377278259;0	638088045681999
1436;9;124;1713;"AAACTGGCGGAAAATATTACAACTCTACTCTCAATGCCAGGCTGTTGTAGAAGCTCCTGG";"A_33_P3248231";"LOC283028";"AK092783";"gb|Homo sapiens cDNA FLJ35464 fis	clone SMINT2005402. [AK092783]";6	87262988799912;0	279823432637558;3	34086621754528;0	00886283488344136;0	0245422964072922;0	90096953982162
1438;9;126;6458;"TTGGATTGTCTGATAAGTCTGCCAATAAACTATCCAGAAATAGCAAGTGTAATAGTCCCC";"A_23_P104146";"ZMYM4";"NM_005095";"ref|Homo sapiens zinc finger	MYM-type 4 (ZMYM4)	mRNA [NM_005095]";10	6080207075723;-0	354712934833584;-6	85649164387543;8	07455012064783e-05;0	000457382543359351;0	167909201638716
1439;9;127;3491;"GGTAGCCCTTGCTCTGATTTTTGCCATTCAGAAATGTGACCCGGCTCCATTTTACTTGTT";"A_23_P138631";"SMC3";"NM_005445";"ref|Homo sapiens structural maintenance of chromosomes 3 (SMC3)	mRNA [NM_005445]";12	6616695755379;0	226583558390971;3	85994370493577;0	00397638159910173;0	012356118178746;0	453604093306386
1442;9;130;3044;"GAGCATGGGGCCAGGAAAGTCTGGTAATAAATGTGACTCAGCATCACCCACCTTAAAAAA";"A_33_P3352767";"MC1R";"NM_002386";"ref|Homo sapiens melanocortin 1 receptor (alpha melanocyte stimulating hormone receptor) (MC1R)	mRNA [NM_002386]";9	71376105770118;0	902839201736814;5	57515872150944;0	000367490671077755;0	00162599337209984;0	596916635632563
1443;9;131;350;"CCTCCCCACCAAAATAATAATAATAATAAGGCTACACAGTATCTGGAATTTCTTGCTCAT";"A_21_P0001800";"XLOC_002487";"BC031974";"gb|602720851F1 NIH_MGC_97 Homo sapiens cDNA clone IMAGE:4837645 5'	mRNA sequence [BG772703]";7	49922679834107;0	37313028332252;0	817234878868022;0	4352565532937;0	568540180426663;0	208716159330922
1444;9;132;2522;"CAGGCCCTGGCCTGGCCTTCGTGCCCTTTATTCATTGTCAATAAATCCGCTCAGACCATT";"A_33_P3229027";"RELL2";"NM_173828";"ref|Homo sapiens RELT-like 2 (RELL2)	transcript variant 1	mRNA [NM_173828]";10	6664152557;0	822943431136858;12	1241026775116;8	25738409272586e-07;1	1384606642247e-05;4	1.7939e+07
1445;9;133;326;"AACGAGGACACCGTCAACTCTCTCTACCCCGATTTCCTTCTGTCAGCCTGCAGGAAGCAT";"A_23_P76291";"PRR4";"NM_007244";"ref|Homo sapiens proline rich 4 (lacrimal) (PRR4)	transcript variant 2	mRNA [NM_007244]";9	11430037924503;-0	0453017037397547;-0	285168130582374;0	78208087958804;0	852910949000108;0	313111198918257
1446;9;134;154;"CGTGAACATCATCCTGCTGCCCTACACAATATTGTCTAGACTATGGGTAGCTAAAAAATC";"A_21_P0007869";"XLOC_010016";"TCONS_00021289";"linc|BROAD Institute lincRNA (XLOC_010016)	lincRNA [TCONS_00021289]";6	89040716381779;-0	219006316085628;-0	977994773400306;0	35406963190034;0	489263172215431;0	179612864178279
1448;9;136;831;"TCACATGCTCTTCATGGTGCATCCCGAGTACCGGCCCAAGAGACCTGCCAACCAGTTTGT";"A_33_P3318027";"CSNK2B";"NM_001320";"ref|Homo sapiens casein kinase 2	beta polypeptide (CSNK2B)	mRNA [NM_001320]";14	1527132617917;0	337825242257907;6	6374059189835;0	000103127354211605;0	000559837408988479;0	205521294495249
1449;9;137;3088;"GTGCAGAGTTCTATATAGGATGCTGGATTAGTTCCTTTGATATTTGTAAAAATTCCCCCA";"A_24_P53519";"CHAF1A";"NM_005483";"ref|Homo sapiens chromatin assembly factor 1	subunit A (p150) (CHAF1A)	mRNA [NM_005483]";12	6706292403865;-0	743275047441646;-11	097897216927;1	72769545191688e-06;2	02318921552712e-05;7	4.27308e+07
1450;9;138;2879;"ATTCAATGTAGCAGACTACTGAGAAACTACTGTGTTGCTCAGGCTTTGTTTGAGGTCCTG";"A_23_P138461";"C10orf2";"NM_021830";"ref|Homo sapiens chromosome 10 open reading frame 2 (C10orf2)	transcript variant 1	mRNA [NM_021830]";8	3652058486203;-0	191814550819403;-1	71980607048755;0	120176516575529;0	215075930337608;0	789562878579712
1451;9;139;461;"GTAAAGGTGTTGCTGGAAAAGGCTACTAGGAGAGTACGTGATGCCCTTACAGCTGAAAAA";"A_24_P84428";"CACYBP";"NM_014412";"ref|Homo sapiens calcyclin binding protein (CACYBP)	transcript variant 1	mRNA [NM_014412]";12	0672390943947;0	118379485309323;1	85919713999484;0	0965183202203295;0	180421698791182;0	662344110901647
1452;9;140;2319;"CTTTGGCAATTCTTCTTCTCAAGCACTGACACTCATTACCGTCTGTGATTGCCATTTCTT";"A_23_P205686";"PSEN1";"NM_000021";"ref|Homo sapiens presenilin 1 (PSEN1)	transcript variant 1	mRNA [NM_000021]";10	5825804383423;0	050107162538735;0	856671010911667;0	414236134111569;0	548474275662865;0	201349787137743
1453;9;141;1168;"TTCGCTCTTTGGACTAATGGGAGTTGCTTTTGGAATGAATTTGGAATCTTCCCTTGAAGA";"A_33_P3372281";"MRS2";"NM_020662";"ref|Homo sapiens MRS2 magnesium homeostasis factor homolog (S. cerevisiae) (MRS2)	mRNA [NM_020662]";10	1697720765879;-0	0121919582580752;-0	175646015177407;0	864527867704128;0	910879219408117;0	334391866809726
1454;9;142;3908;"TGAGATATTTAAGGTTGAATGTTTGTCCTTAGGATAGGCCTATGTGCTAGCCCACAAAGA";"A_24_P250922";"PTGS2";"NM_000963";"ref|Homo sapiens prostaglandin-endoperoxide synthase 2 (prostaglandin G/H synthase and cyclooxygenase) (PTGS2)	mRNA [NM_000963]";6	83139302505664;1	54824379619389;14	8918314011495;1	44813627522875e-07;2	98533153983736e-06;1	9.59418e+06
1458;9;146;431;"CATTTGTCTTAAGTCCTGGTGTTGTGTGGATGACAAGCAGAAGCCAGTTATGATGACAGG";"A_21_P0014502";"LOC100287803";"XR_110120";"ref|PREDICTED: Homo sapiens hypothetical LOC100287803	transcript variant 1 (LOC100287803)	miscRNA [XR_110120]";7	45842418664891;0	101370783351843;1	03502603176282;0	328128188871317;0	462573492700704;0	169814845333055
1459;9;147;4094;"ATTAAGCTCAGCACTCTCTAAAGGAGCAACAGTTTACAGCCCTTCCAGATACAGCTACCA";"A_33_P3376434";"SETD5";"NM_001080517";"ref|Homo sapiens SET domain containing 5 (SETD5)	mRNA [NM_001080517]";8	59816842340328;0	0444257285828726;0	326509834983101;0	751632920996279;0	830559281562402;0	304905702907862
1461;9;149;2492;"GTAACGTGTTCACCTCTCGGAAAGGAGCAAAACTTTGCTCAGATCCCAGAATTAACCTGA";"A_32_P220750";"PLGLB1";"NM_001032392";"ref|Homo sapiens plasminogen-like B1 (PLGLB1)	mRNA [NM_001032392]";6	59298826260152;0	316431585871928;3	93725083337492;0	00353948078069303;0	0112062663835795;0	411392010722033
1462;9;150;5251;"CGTGGTCACTTTAAGCGGGATTATCAGTACGGTTGGTGTGGTCACTTTGGTTTATCATCA";"A_24_P22746";"ZADH2";"NM_175907";"ref|Homo sapiens zinc binding alcohol dehydrogenase domain containing 2 (ZADH2)	mRNA [NM_175907]";9	33570890554376;-0	0747362194979946;-0	9052726832877;0	389317132965551;0	524506450741376;0	192550985333841
1463;9;151;2461;"CAATTATGTTTGTGATAAAAATGCATCTGGCCCCTGGAAGATTTATTGAGAGGCTGAAGT";"A_23_P116624";"SLC6A5";"NM_004211";"ref|Homo sapiens solute carrier family 6 (neurotransmitter transporter	glycine)	member 5 (SLC6A5)	mRNA [NM_004211]";6	54202553100147;-0	0812940711564654;-1	37204738610018;0	203843264056356;0	324447335905308;0	119107504072072
1470;9;158;2434;"ACAGCCAGAAACAAATATACATTTGTTTCATTTCTTGACTTTCCCTAAGCAGATAAGCAG";"A_32_P73217";"TMEM167B";"NM_020141";"ref|Homo sapiens transmembrane protein 167B (TMEM167B)	mRNA [NM_020141]";8	75992613097321;0	44389815813985;5	27849841206331;0	00053829630617919;0	00224354036172081;0	823623630700761
1471;9;159;0;"ACCACACACACTTGCTACAGTTCGATGGGGAGGGTGGCTGGAAGTTCGAGAAGCTAGGCT";"A_33_P3349619";"A_33_P3349619";"A_33_P3349619";"Unknown";6	62673555632904;0	164260964076788;0	986816966704458;0	349959391368977;0	484916173538309;0	178017042282587
1472;9;160;4405;"GATGGCTGTCAGAGCTCTTGCAGATACTGTGTTCACTAAATAAAAATCACATGTATTGTT";"A_33_P3271051";"CYTH3";"NM_004227";"ref|Homo sapiens cytohesin 3 (CYTH3)	mRNA [NM_004227]";12	6016877167791;0	400327678969347;6	62552165820273;0	000104522063105351;0	000565868100728501;0	2077352150965
1474;9;162;1487;"CTTGAAAACCTAGAAGAAACTACCACAGAAGCAATTTTTCATGTTTTTCTCCTATGAGAC";"A_24_P243776";"ZNF277";"NM_021994";"ref|Homo sapiens zinc finger protein 277 (ZNF277)	mRNA [NM_021994]";9	5307476570446;-0	0439714098442288;-0	58262027004294;0	57470064732243;0	691049504178903;0	253690422216981
1477;10;1;1019;"GATTTATACACACATCACTAAAAATTATCCCTACTACAGGACTGCGGACAAGGGCTGGCA";"A_33_P3310070";"FOXK2";"NM_004514";"ref|Homo sapiens forkhead box K2 (FOXK2)	mRNA [NM_004514]";6	79428601849427;0	396755440522405;3	0788495449467;0	0134372535397982;0	0349818638387432;0	128421534977184
1479;10;3;555;"CTGTTCACCTCCGAGACAGATAAATTGCGTCTGGACAGCCCTTTCCCATTCCTGGGCTCT";"A_33_P3370881";"LOC390937";"XM_003403707";"ref|PREDICTED: Homo sapiens Ets2 repressor factor-like (LOC390937)	mRNA [XM_003403707]";7	16758394043714;-0	488779904832535;-1	65431070533053;0	13304758883993;0	232840516035944;0	854778253441682
1480;10;4;4452;"CTAGGGAGCTATGTGTTCTTTTTGTTCATTTCGTTCTTACTTCCCTGAAGCAAGAGACTA";"A_23_P40039";"AMMECR1L";"NM_031445";"ref|Homo sapiens AMME chromosomal region gene 1-like (AMMECR1L)	transcript variant 1	mRNA [NM_031445]";10	9719191681616;-0	391532669208885;-6	60382120485115;0	000107122286597325;0	000577033006813177;0	211833951469953
1485;10;9;3118;"ACTACCCTAGATGAGCTGTCCTGCTCCAGTAACATTCTTTTTCTAAAATCATTTATAGTA";"A_23_P20532";"CNTNAP3B";"ENST00000276974";"ens|contactin associated protein-like 3B [Source:HGNC Symbol;Acc:32035] [ENST00000276974]";7	23994074093905;0	349597270518242;0	995278420092352;0	346050780658302;0	481179705261931;0	17664535152975
1486;10;10;2032;"TGTCAGTGTGGACAAAGGATGCAAAGCTGTGCTGTGGGCACAGTACTGACGGGGCTCTCA";"A_33_P3352134";"ATG16L1";"NM_030803";"ref|Homo sapiens ATG16 autophagy related 16-like 1 (S. cerevisiae) (ATG16L1)	transcript variant 1	mRNA [NM_030803]";6	90120476555083;-0	420773074642271;-1	37575411092648;0	202733697484493;0	323096790067898;0	118611706677466
1487;10;11;691;"TGCACTCTCTTCCTGTACAGTATTTATTGTTCCTGGCACTTTATTTAAAGATATTTGACC";"A_23_P164912";"LIN7B";"NM_022165";"ref|Homo sapiens lin-7 homolog B (C. elegans) (LIN7B)	mRNA [NM_022165]";9	51393726680016;-0	18604019803486;-2	71492168728426;0	0241741735617085;0	0577824337232251;0	212124455908367
1489;10;13;1520;"GTTTCCTGACGTTTTACATTTCCACTTTCCTATTCCATTCATTAAGCTAGCCAACAATCC";"A_24_P410627";"MKRN1";"NM_001145125";"ref|Homo sapiens makorin ring finger protein 1 (MKRN1)	transcript variant 2	mRNA [NM_001145125]";9	50656352874903;-0	469245866381002;-7	1742344630784;5	7182348376555e-05;0	000343435604844633;0	126078266564856
1490;10;14;1555;"GCACCTTAGAAGAATGACACCAGAAAACCTTATTATATCACAATATTCTGTTTTCCCCTT";"A_23_P371410";"PRKACB";"NM_207578";"ref|Homo sapiens protein kinase	cAMP-dependent	catalytic	beta (PRKACB)	transcript variant 3	mRNA [NM_207578]";6	66283827932725;-0	787253858026673;-1	8158055510181;0	103372039616857;0	190784138269698;0	700385548318292
1491;10;15;2602;"TGGCTGCTTTCAAAGTCCTTCACATCGTATAGACAACATTTGATAGGAAGGAGACCAAAA";"A_23_P83751";"C11orf63";"NM_024806";"ref|Homo sapiens chromosome 11 open reading frame 63 (C11orf63)	transcript variant 1	mRNA [NM_024806]";8	10356815396651;-0	339288242364027;-2	07914235720083;0	0679019837006336;0	136337794689361;0	500508176183016
1492;10;16;2846;"CAAGCTACTGGCACATAGTGAAAGATTACTTCTGACATTCCATTGCTCTTCTTTTGAAAA";"A_23_P82738";"RAD54B";"NM_012415";"ref|Homo sapiens RAD54 homolog B (S. cerevisiae) (RAD54B)	transcript variant 1	mRNA [NM_012415]";10	2324148756596;-0	597557378235479;-9	41763990959676;6	65504906646469e-06;5	97709960811705e-05;2	1.94246e+07
1493;10;17;336;"TTCATTACAGGGACCATGAATTGTTGGAGGGTCAGGGCTCTAAGAGAAGCAGGAGGTCAC";"A_21_P0003883";"XLOC_003853";"TCONS_00009007";"linc|BROAD Institute lincRNA (XLOC_003853)	lincRNA [TCONS_00009007]";7	61538268840095;0	563974242435667;2	35205850127203;0	0436328360352469;0	0948911714276033;0	34835393410398
1495;10;19;776;"GGCAGATCTACTGGGCGCCTGTCACCCAGGAACTCTACTGGCAGATTGGCATTGAAGAGT";"A_23_P7965";"PGC";"NM_002630";"ref|Homo sapiens progastricsin (pepsinogen C) (PGC)	transcript variant 1	mRNA [NM_002630]";5	82706808003645;0	235910395385664;2	54022733052363;0	032118539325979;0	0734385814629817;0	269599567407211
1496;10;20;4890;"TCAACAAATATCTTGTGTTGTCCTTTTGTCTTCTCTGTCTCAGACTTTTGTACATCTGGC";"A_23_P121095";"TOP2B";"NM_001068";"ref|Homo sapiens topoisomerase (DNA) II beta 180kDa (TOP2B)	mRNA [NM_001068]";12	2225212341888;0	179431760572069;2	7587064430335;0	0225159119527804;0	0543924665295754;0	199679584687737
1497;10;21;2271;"ATCTGACATGGTTACTAGTTGTGTGATTTCTGTCTGCCTTTGCAGTGGACACACCACAGA";"A_21_P0013982";"LOC100506571";"XM_003119160";"ref|PREDICTED: Homo sapiens hypothetical protein LOC100506571 (LOC100506571)	mRNA [XM_003119160]";6	25755765739011;0	333355155252502;2	10216562239721;0	0654278816307752;0	132278019154259;0	485604378938709
1498;10;22;589;"CTACAGCCCACCGGCCATGTCTGGCCCCTTCTTGCTGTTGAAAATAAAGTTATGCTGGAG";"A_21_P0010098";"XLOC_013602";"TCONS_00028585";"linc|BROAD Institute lincRNA (XLOC_013602)	lincRNA [TCONS_00028585]";7	9089833149422;-0	243110043489664;-0	849707184485573;0	417895970772304;0	551912186631073;0	202611874846069
1499;10;23;910;"AAATCTGGTTAAAGAAAACTCGTTTCCGATCCAGCCAGGTGCTGAGACAGGCAGAACTTT";"A_21_P0008572";"XLOC_011306";"TCONS_00023266";"linc|BROAD Institute lincRNA (XLOC_011306)	lincRNA [TCONS_00023266]";6	4075799142138;0	082489776035878;0	765919919705355;0	463674864414634;0	59432235867374;0	218181026385484
1500;10;24;1927;"AGAACAGATTTCTTCGCAAGACTATGGAAAGGAAGTGGACCTCTACGCTTTGGGGCTAAT";"A_23_P142750";"EIF2AK2";"NM_002759";"ref|Homo sapiens eukaryotic translation initiation factor 2-alpha kinase 2 (EIF2AK2)	transcript variant 1	mRNA [NM_002759]";11	5574964093978;0	218939585955171;4	01349111066262;0	00315818917260273;0	0101786959464369;0	373668985601551
1501;10;25;771;"GTTTCCCTAGTGCTGGGCATCCAGTCAGCCCTCAATAAATGCTTATGAATGGATCAACAA";"A_24_P703830";"NANOS3";"NM_001098622";"ref|Homo sapiens nanos homolog 3 (Drosophila) (NANOS3)	mRNA [NM_001098622]";8	21102047397414;1	05714192674701;3	30217546116651;0	00942047723602912;0	0258506828221555;0	949001569365438
1503;10;27;387;"TCGCTTTGGGATCATGGAGAAGGTTTATTGCCATTATTTTGTGAAGTTGGTGGAAGGGCC";"A_23_P122233";"MRPL22";"NM_001014990";"ref|Homo sapiens mitochondrial ribosomal protein L22 (MRPL22)	nuclear gene encoding mitochondrial protein	transcript variant 2	mRNA [NM_001014990]";13	1187457521701;0	556439214881232;11	5941007719708;1	20029322291943e-06;1	51769885711384e-05;5	5.71608e+07
1504;10;28;2427;"GTTAACATAGGCTTATACAAATTTAACTTTTAAAGAATTCTTTTTACATCTATCCCAGAG";"A_23_P413180";"MDM1";"NM_017440";"ref|Homo sapiens Mdm1 nuclear protein homolog (mouse) (MDM1)	transcript variant 1	mRNA [NM_017440]";7	57528108459724;0	0270592311675273;0	255585776356592;0	804115692268759;0	869066094952432;0	319041896752259
1505;10;29;5244;"GCAATTCATGTAGTTTCTGGGTCTTCTGGGAGCCTACGTGAGTACATCACCTAACAGAAT";"A_23_P250813";"WRN";"NM_000553";"ref|Homo sapiens Werner syndrome	RecQ helicase-like (WRN)	mRNA [NM_000553]";9	50365261910436;0	0825870583330364;1	43716873931242;0	185091606373871;0	301273076424058;0	110600027202742
1508;10;32;1797;"CAGGGCCCAGGTCTGTGTGATATCTGTATATATTGCATTTTGTTGATTTTAATAGAAAAC";"A_33_P3347707";"NOVA2";"NM_002516";"ref|Homo sapiens neuro-oncological ventral antigen 2 (NOVA2)	mRNA [NM_002516]";6	14494336667149;0	452475275848355;0	974516060764113;0	355700188337888;0	490729185669312;0	180151050762368
1509;10;33;2160;"TGTTTTAGACAAATACTCATGTGTATGGGCAAAAAACTCGAGGACTGTATTTGTGACTAA";"A_32_P8015";"HNRNPA1L2";"NM_001011724";"ref|Homo sapiens heterogeneous nuclear ribonucleoprotein A1-like 2 (HNRNPA1L2)	transcript variant 1	mRNA [NM_001011724]";15	4292591596153;-0	194190475092281;-2	94247468881742;0	0167276660069696;0	0422358801180291;0	155051674229617
1510;10;34;775;"AGAAAAAGCAGCGGTGACAGCCTTTGGTCCCCATCTCCATTGTTCCTGCCAGCTCTGGAC";"A_33_P3365352";"LOC100130476";"AK124173";"gb|Homo sapiens cDNA FLJ42179 fis	clone THYMU2030796. [AK124173]";7	95318361816602;0	141311306182832;0	523864470091582;0	613245949656979;0	722945915666982;0	26539987870119
1511;10;35;0;"GAACTCAGGGGTTCAAGACCAGCCTGGGCAACATGGCAAAACCCCATCTCTACAAAAAAT";"A_33_P3315763";"A_33_P3315763";"A_33_P3315763";"Unknown";18	131018239062;0	032474917185155;0	71261530452567;0	494454557186532;0	621957848972466;0	228326260785713
1512;10;36;1918;"CGGCGGCCCTGACGAGTGGGCGGACTTCGGCTTCGACCTGCCCGACTGCAAGGCCCGCAA";"A_24_P413470";"TP73";"NM_005427";"ref|Homo sapiens tumor protein p73 (TP73)	transcript variant 1	mRNA [NM_005427]";6	41925425190167;0	47467268777576;2	04749842000967;0	07145015715025;0	142087878945436;0	521617247152398
1514;10;38;782;"ACAAACCTCAAGGTCCCCCACCTCCAGGAAAGCCACAAGGACCACCCGCACAAGGAGGCA";"A_33_P3258593";"PRB1";"NM_005039";"ref|Homo sapiens proline-rich protein BstNI subfamily 1 (PRB1)	transcript variant 1	mRNA [NM_005039]";9	08873356052384;0	15051136195893;1	05139995749733;0	320954042495405;0	454951153532822;0	167016616797925
1515;10;39;1896;"CTAATTGTGCTAGACTCTCTGGACCAGCAGAACTCAGAAGTTTTAATATGCCTTCTTTGG";"A_24_P305223";"CTAGE1";"NM_172241";"ref|Homo sapiens cutaneous T-cell lymphoma-associated antigen 1 (CTAGE1)	transcript variant 1	mRNA [NM_172241]";7	00599014126367;-0	180218831361476;-1	60140460845982;0	144346866502982;0	248293893738827;0	911508978091879
1516;10;40;909;"TCGATGACAGTGAGATGGAGAGCCCTGTTGATGACGTGTTCTATCCCGGGACAGGCCGTT";"A_33_P3884230";"NFIX";"NM_002501";"ref|Homo sapiens nuclear factor I/X (CCAAT-binding transcription factor) (NFIX)	mRNA [NM_002501]";7	16217728432076;0	0482863314945554;0	424951005675905;0	681024386672367;0	776604890107846;0	285098565697294
1517;10;41;216;"AGGTCAGCAAAGAGATTTTCAACAAGGCCACACTCGAAGTGATCCTGAGGCCGAAGATTG";"A_24_P211151";"EXOSC5";"NM_020158";"ref|Homo sapiens exosome component 5 (EXOSC5)	mRNA [NM_020158]";10	037379703534;-0	0224745024114679;-0	296737780962273;0	773517536788417;0	846803685451651;0	310869168124762
1518;10;42;2918;"CATTTGTCCTGACTCTGTGTATAAGCTGATGCTCAGCTGCTGGAGAAGAGATACGAAGAA";"A_23_P452";"DDR2";"NM_001014796";"ref|Homo sapiens discoidin domain receptor tyrosine kinase 2 (DDR2)	transcript variant 1	mRNA [NM_001014796]";5	92136615478816;0	155229336124012;1	66134805510598;0	13160665528055;0	230833496862054;0	847410307461796
1519;10;43;224;"CTTCAGGGAGGAGCTGGATGTCCTCAAGTTCTTGTGCAAAGACCTGTGGGTGGCGGTGTT";"A_24_P390928";"TRAPPC6A";"NM_024108";"ref|Homo sapiens trafficking protein particle complex 6A (TRAPPC6A)	mRNA [NM_024108]";7	29516000062455;-0	148522647545991;-1	75292855958229;0	114112069454548;0	206322417970972;0	757427955759501
1520;10;44;6312;"CTGTGCTACTTCAGACAGCTGAAAACTTAATGGTATTATTTCAAGTTCACATAACCCTAA";"A_33_P3386429";"SENP6";"NM_015571";"ref|Homo sapiens SUMO1/sentrin specific peptidase 6 (SENP6)	transcript variant 1	mRNA [NM_015571]";7	00390335579555;-0	490641032542015;-1	18128608557737;0	268280220306581;0	398396746168241;0	146254990610813
1521;10;45;1016;"GGGCAATATTTGCCCATTCTGGTGTAACTTATGTGACTCTAGTGCTTAACAGCTGCCGTT";"A_23_P205768";"ARPP19";"NM_006628";"ref|Homo sapiens cAMP-regulated phosphoprotein	19kDa (ARPP19)	mRNA [NM_006628]";11	445603178479;0	117408928308304;1	79726772086226;0	106436523897118;0	195308623995509;0	716995338024452
1523;10;47;1811;"AGGTCCTTAACCCCATGATCAGTAGTGTATTGTTAGAGGGCTGCAACAGTACAACGTACA";"A_23_P132915";"FAM114A1";"NM_138389";"ref|Homo sapiens family with sequence similarity 114	member A1 (FAM114A1)	transcript variant 1	mRNA [NM_138389]";9	31071572345242;-0	759964373818784;-9	48749755007161;6	2674405307178e-06;5	69483293679458e-05;2	9.06238e+07
1526;10;50;996;"TTTATATACACACTTGTCTCCCAATAAAAGTGAGAACCACCTCCTACATATCCCTTGTGT";"A_21_P0008462";"XLOC_011074";"TCONS_00022796";"linc|BROAD Institute lincRNA (XLOC_011074)	lincRNA [TCONS_00022796]";6	04186933162891;0	174219157295838;2	43385098604794;0	0381937346727209;0	0848925529609171;0	311648115995999
1527;10;51;0;"CAATATGCAGAGGATGTACTCTCTGGAAAGGTGTCGGTTGGCCGCTTCCTGGTGAACCTG";"A_24_P59247";"A_24_P59247";"A_24_P59247";"Unknown";13	4120341389726;-0	0572718243578532;-1	28227547345297;0	232335704192159;0	358416249324241;0	131577794457043
1529;10;53;1309;"GCATAGACCTCAAGCCCACACCTCATCGGAGGAACTTCAAGAAGTTTATGGAAAAAGACA";"A_33_P3289576";"EFHC2";"NM_025184";"ref|Homo sapiens EF-hand domain (C-terminal) containing 2 (EFHC2)	mRNA [NM_025184]";6	15943689807935;0	0126850725665832;0	052854054665554;0	959022795818447;0	974215779849705;0	357643281741699
1530;10;54;936;"GACGCCTTTAATCAAGCCTGGCATTTGTTTGCCCACGAATGTCCCAACTACTTCATCTAA";"A_33_P3217998";"AKR7L";"NR_040288";"ref|Homo sapiens aldo-keto reductase family 7-like (AKR7L)	transcript variant 1	non-coding RNA [NR_040288]";11	6857232761977;0	093355280086282;1	65412600478571;0	133085599736461;0	232869044615263;0	854882984394948
1533;10;57;632;"TTATACTTCCCAGCTATTCCATCTGTGGATGAAAGTAACAATGTTGGCCACGTATATTTT";"A_23_P53957";"COX16";"NM_016468";"ref|Homo sapiens COX16 cytochrome c oxidase assembly homolog (S. cerevisiae) (COX16)	nuclear gene encoding mitochondrial protein	transcript variant 1	mRNA [NM_016468]";13	5954314219436;-0	0515998044384389;-0	801400731233201;0	443897436992162;0	576248316689167;0	211545884742945
1538;10;62;2225;"TCAAGATTTTCTTGAAGATTTGTTAGAAATAATGTCTTATTTCTGGTAACCTTTCCCTTT";"A_24_P219266";"LRRC57";"NM_153260";"ref|Homo sapiens leucine rich repeat containing 57 (LRRC57)	mRNA [NM_153260]";9	64541850744854;-0	391718471183381;-4	76290149972611;0	00107659795968138;0	0040525116788568;0	148771309816651
1540;10;64;1862;"GTGTGGGTTTTTGTCCTCTCGAGTTTTGTCTCTAATAAAGGCCTTTTTTGTTTCAAATTA";"A_21_P0014094";"LOC100288092";"XR_108415";"ref|PREDICTED: Homo sapiens hypothetical LOC100288092 (LOC100288092)	miscRNA [XR_108415]";9	16072782887127;0	020583038200753;0	210306824463238;0	838193506060891;0	892822714409966;0	327763163150953
1541;10;65;425;"CAGATCCTAGATGGTATTCACTACCTGCATGCTAACTGGGTGTTGCACAGAGATTTGGTA";"A_33_P3264780";"CDK8";"NM_001260";"ref|Homo sapiens cyclin-dependent kinase 8 (CDK8)	mRNA [NM_001260]";6	64764379221546;-0	124872284351605;-1	32261138204879;0	219143529261331;0	343198305023828;0	12599115168905
1543;10;67;468;"GTTGGTTTTACTAAAAAACGCAAAAATCAGATACGGAAGACCTCTTATGCTCAGCACCAA";"A_32_P58074";"RPS3A";"NM_001006";"ref|Homo sapiens ribosomal protein S3A (RPS3A)	mRNA [NM_001006]";16	6754855618999;-0	165625669159628;-3	6101134636126;0	00582378309400278;0	0170947131227775;0	627562130291733
1544;10;68;2074;"GTCATTGGGGTCAGTTCAGAAGAAACTCTTATTACCTGCCTGGAAATTGCCATGAGATAA";"A_33_P3331080";"SEC24A";"NM_001252231";"ref|Homo sapiens SEC24 family	member A (S. cerevisiae) (SEC24A)	transcript variant 2	mRNA [NM_001252231]";6	98441071815706;-0	0933822916877416;-0	482622688196601;0	641084872833288;0	744793002044008;0	273420138514246
1545;10;69;1575;"CCTTTTTGGCATCCTGGCTTGCCTCCAGTTTTAGGTCCTTTAGTTTGCTTCTGTAAGCAA";"A_23_P120845";"XBP1";"NM_005080";"ref|Homo sapiens X-box binding protein 1 (XBP1)	transcript variant 1	mRNA [NM_005080]";13	4602702303834;-0	230389663055659;-4	53831723213141;0	00147370155489206;0	00530010167616051;0	194571448772792
1546;10;70;4494;"TCCCCATTTCTGCCTGATTTGCAACTTTTCTTGTTGATGTCGTGTTGTCTTGGGGGACCC";"A_24_P234838";"PCDH1";"NM_032420";"ref|Homo sapiens protocadherin 1 (PCDH1)	transcript variant 2	mRNA [NM_032420]";6	550536753722;-0	0213000828406562;-0	190857899662467;0	852946326837194;0	903066815740637;0	331523863905524
1547;10;71;0;"TGCGCTTTTTGTCCTCCTTCGAGTTTTAGCAACTGCCTTCTTAAAGCCCTTTTCGGAAAT";"A_33_P3379136";"A_33_P3379136";"A_33_P3379136";"Unknown";6	45405862606751;-0	0313877478917242;-0	397194412737056;0	700639274109915;0	791857965119835;0	290698105262113
1548;10;72;387;"GGTGGAGGTGGGCGGGGACGTGCAGCTGGACTCCGTGAGGATCTTCTGAGCAGAAGCCCA";"A_24_P238250";"LGALS7";"NM_002307";"ref|Homo sapiens lectin	galactoside-binding	soluble	7 (LGALS7)	mRNA [NM_002307]";8	44085333547803;0	103181178062254;0	365005383102425;0	723683465972679;0	809712246966406;0	29725257100248
1549;10;73;403;"CCTCTTTTAATCCTGTTTCTCTCTAAGTTAGTAGCTATTACACCCAAATGGTTGAGTTTT";"A_33_P3339311";"ENST00000434311";"ENST00000434311";"tc|XM_322591 predicted protein {Neurospora crassa} (exp=-1; wgp=0; cg=0)	partial (9%) [THC2496490]";8	33240303487857;-0	934021803449592;-8	59061686330165;1	39481152549311e-05;0	000109023645592345;4	2.35504e+06
1551;10;75;2632;"TTGGTTCTTGCTTTGATTGGTGCCCTGCTATAGCCCAAAGCACGTAGTATTTGCTGATGA";"A_23_P129174";"LRRC49";"NM_017691";"ref|Homo sapiens leucine rich repeat containing 49 (LRRC49)	transcript variant 2	mRNA [NM_017691]";9	24416431841321;0	134782550501296;1	72539747498439;0	119132381234388;0	213516013819137;0	783836286232836
1553;10;77;0;"ATTTCTGCAGCAGGCACAACCTTTCCTAGAAACGGAGGTCCCAGTGGAGCTGGACGCCTT";"A_33_P3359408";"A_33_P3359408";"A_33_P3359408";"Unknown";5	91112983662392;0	332586141003087;1	22851335676774;0	250942059787924;0	379514779771379;0	13932325272729
1554;10;78;2205;"CTGAGGAATGCATCTAGACTTATTCGTGTGAATCCTGAAAGTACAACATCAGTGGTCTAA";"A_33_P3397051";"EXOC8";"NM_175876";"ref|Homo sapiens exocyst complex component 8 (EXOC8)	mRNA [NM_175876]";7	6996314296387;0	184512907462227;1	97309615270957;0	0805075811083663;0	156371239557878;0	574052734950818
1556;10;80;63;"GAATGTGTATCCATAACTCCCTGATTTTCAACCACATTCCAGCCTGCCTGACTCATGAAG";"A_21_P0001664";"XLOC_000041";"ENST00000414210";"linc|BROAD Institute lincRNA (XLOC_000041)	lincRNA [TCONS_00001934]";6	953249675709;-0	339202825601673;-1	33240266066839;0	216038151691791;0	339358963264758;0	124581695165308
1557;10;81;2756;"ATGGGTACTGTATTTGAAAGCTGTTAGCTTTGTCAACACGCATTGTCCTTGTCATTTGGG";"A_23_P216689";"BRD3";"NM_007371";"ref|Homo sapiens bromodomain containing 3 (BRD3)	mRNA [NM_007371]";10	9598394420436;-0	0268579197899932;-0	398488917845155;0	699719089150587;0	791040234985628;0	290397909253359
1558;10;82;2194;"TCATGGAAATCTAGCCCTGGGTTTGGCATCCGCTTTGGCTGGAGCTCTCAGTGCGTTCCT";"A_33_P3321642";"GRHL2";"NM_024915";"ref|Homo sapiens grainyhead-like 2 (Drosophila) (GRHL2)	mRNA [NM_024915]";6	70883046775214;-0	274886477857012;-1	7009566363462;0	123758715480404;0	22003635538732;0	807773040335523
1559;10;83;573;"GTGGATATAGATCAATTCATGCTTTTCAATTCAGTCCTCTCTCTAATAAACTGCTGTCAT";"A_21_P0013161";"XLOC_l2_013153";"THC2506834";"linc|BROAD Institute lincRNA (XLOC_l2_013153)	lincRNA [TCONS_l2_00025505]";6	37272243854309;-0	146631994259651;-0	452913250572994;0	661517719690634;0	760653191583099;0	279242555224311
1560;10;84;4121;"CAATGAACTATGTGGTTTTGAATCGGATGTAGACCATTAGTACTACTACTTGAGCTAAAC";"A_24_P941505";"FAM120A";"NM_014612";"ref|Homo sapiens family with sequence similarity 120A (FAM120A)	mRNA [NM_014612]";12	6148395505987;-0	170505940179162;-2	57357889530017;0	0304209870476019;0	070200599726915;0	257712648325637
1562;10;86;2619;"AGGCTTAGTAGCTCAGTCTTTAACAAGGGCTAGAAAAGAATGTAATCTGATATGGAAGGA";"A_23_P13822";"STYK1";"NM_018423";"ref|Homo sapiens serine/threonine/tyrosine kinase 1 (STYK1)	mRNA [NM_018423]";9	05948548790859;-0	264618515451602;-3	95376924037987;0	00345290652195602;0	0109878883836214;0	403375160022155
1563;10;87;845;"TCCTTGCTTTGAAAGCCAGTTGCTAAAAATAAAAACTGTTCCATGAAAAATCACAATGCC";"A_21_P0014060";"PIGC";"ENST00000488806";"ref|PREDICTED: Homo sapiens hypothetical LOC100505991	transcript variant 2 (LOC100505991)	miscRNA [XR_108307]";7	57607975618828;0	472874739849271;2	05439295963448;0	0706621944115345;0	140869125025597;0	517143093063104
1564;10;88;9957;"GACTTTGTTACTCAAGTCCAGAGTTCTCTGTGCACTTCTGCTAGATAAGGAGTGTAAGCC";"A_24_P944299";"CDC42BPA";"NM_003607";"ref|Homo sapiens CDC42 binding protein kinase alpha (DMPK-like) (CDC42BPA)	transcript variant B	mRNA [NM_003607]";10	4196731271675;-0	109137656131089;-1	4173598583377;0	190630991115204;0	308049879184859;0	113087851798914
1566;10;90;1083;"CCTGGGCCGAACCCTTGGCAGGCGGGCACCGAGGCTGTGGTGCTGCGTGCTCAGCGGTAA";"A_33_P3346628";"ANKRD63";"NM_001190479";"ref|Homo sapiens ankyrin repeat domain 63 (ANKRD63)	mRNA [NM_001190479]";7	44591244506839;-0	0745910344084066;-0	370514124999627;0	719717956370521;0	806705811076398;0	296148881634797
1570;10;94;946;"CAGGTCCTAAACTGTAGCTTGCAATGTGCCTGTTTCCAGAAACCAAGGTGAAAGTGCTTT";"A_19_P00318189";"LOC401320";"NR_038889";"ref|Homo sapiens uncharacterized LOC401320 (LOC401320)	non-coding RNA [NR_038889]";8	58692629037444;0	664512997290251;7	95730903398349;2	55847877496376e-05;0	000179372215639071;6	5.84914e+08
1572;10;96;1595;"GGCGACGACGTAGGGAAAAACGGAAGAGGGCTTTATTGAACCTACCGGGGACACAGACCT";"A_24_P19828";"TOE1";"NM_025077";"ref|Homo sapiens target of EGR1	member 1 (nuclear) (TOE1)	mRNA [NM_025077]";9	17332714056207;0	92837499015253;2	50488398586774;0	0340213887479566;0	0770069838861392;0	28269949023324
1573;10;97;1338;"GTTCTGTTAGGACAGGCATACTGTTACTTTGCAATATCCACTTTATAAAATAGCTCCTGC";"A_24_P385585";"TMEM18";"NM_152834";"ref|Homo sapiens transmembrane protein 18 (TMEM18)	mRNA [NM_152834]";7	33707659319079;0	147271744183746;0	618303589027841;0	551964111766081;0	6719962589525;0	246695806351026
1574;10;98;240;"AAGCCATAAGAAGACTTCCTGAGAACCTTTATAATGACAGGATGTTTCGCATTAAGAGGG";"A_23_P31671";"UQCRB";"NM_006294";"ref|Homo sapiens ubiquinol-cytochrome c reductase binding protein (UQCRB)	nuclear gene encoding mitochondrial protein	transcript variant 1	mRNA [NM_006294]";14	4123815806951;0	274587439357775;0	391545971481537;0	704660445894535;0	794922987761556;0	291823302347678
1575;10;99;1845;"AAGGCCAATACTCAGTATCAGACATGAAGTTAAGGTTCTCACATTCTGTTCAGAATAGTG";"A_23_P122947";"AVL9";"NM_015060";"ref|Homo sapiens AVL9 homolog (S. cerevisiase) (AVL9)	mRNA [NM_015060]";7	46741385019187;0	100424026796404;1	34309240318301;0	212690433471461;0	33552518011234;0	123174279255531
1576;10;100;3526;"ACCTGTGGCTGTTCCCACATCCCCTTGAATATCCCAGGAAAAATAAAACGGCAGAACTGC";"A_33_P3232557";"DLGAP3";"NM_001080418";"ref|Homo sapiens discs	large (Drosophila) homolog-associated protein 3 (DLGAP3)	mRNA [NM_001080418]";6	96415787882414;0	215485601438574;1	51314360518292;0	165127289455341;0	275654727118995;0	101195303210608
1580;10;104;1043;"TCTTTTCACAGTATAGGAGTTGTCATCATGACTTCCAGTTACCTTCTGGGACCGGTTGTC";"A_24_P76018";"C3orf71";"NM_001123040";"ref|Homo sapiens chromosome 3 open reading frame 71 (C3orf71)	mRNA [NM_001123040]";6	24793977038949;-0	00806589328070473;-0	0962856966895642;0	925440221658416;0	952219547017357;0	349568268937729
1582;10;106;1585;"TCCTGATCCCCGATCCTATACATTTTCATCTCTTTATTGTTTCTATCAAAGCCTGCTAAG";"A_24_P220472";"SPATA12";"NM_181727";"ref|Homo sapiens spermatogenesis associated 12 (SPATA12)	mRNA [NM_181727]";6	0327752386577;0	338844125920453;3	43654499725192;0	00762687466436265;0	0215594769379204;0	79146758286977
1583;10;107;288;"TAGGGGCCATAAAAAATGGTTGTTTTGAGCTGGGTACAGTGGCTCACTCCTGTAATTCCA";"A_21_P0008919";"XLOC_011682";"TCONS_00024360";"linc|BROAD Institute lincRNA (XLOC_011682)	lincRNA [TCONS_00024360]";10	7236609087807;0	22320950152861;3	03310283035966;0	0144593511466482;0	0372718615747468;0	136828320439146
1584;10;108;2210;"GACTTTGTACAGCAGTGTCTTATCCAGCAGCCGATTGGATGTAACGTTTTGCTTTGGGTT";"A_23_P380318";"EGR4";"NM_001965";"ref|Homo sapiens early growth response 4 (EGR4)	mRNA [NM_001965]";5	94085312041196;0	512449647660214;2	17500018916531;0	0581627801803315;0	120009463601407;0	440565419799397
1585;10;109;3560;"TTTGATCCAGCCATCTGCCTACTGGGAATACACCCAAAGAAAAATAAATCATTATATCAG";"A_33_P3485976";"ENST00000528482";"ENST00000528482";"gb|Homo sapiens cDNA FLJ37762 fis	clone BRHIP2024347	weakly similar to GALECTIN-3. [AK095081]";6	28781927316181;-0	100717972845102;-0	608229866448947;0	558329941447616;0	677286546885716;0	248637918126393
1586;10;110;1681;"CTTCACTGGCATGGGCTAACCACTTCTTTTTCAAACCCTCTGAACACCTTTTTCTGATGG";"A_23_P117037";"LETMD1";"NM_015416";"ref|Homo sapiens LETM1 domain containing 1 (LETMD1)	nuclear gene encoding mitochondrial protein	transcript variant 1	mRNA [NM_015416]";10	3564018188928;0	148349262611287;2	75277493081796;0	0227336044781745;0	0548360236944498;0	201307922509468
1589;10;113;609;"TACAAAGTGCCATGACAGAAGGTGGTGTGGTTCTACGGGAACCTCAGAGAATCTATGAAT";"A_23_P8339";"MRPL18";"NM_014161";"ref|Homo sapiens mitochondrial ribosomal protein L18 (MRPL18)	nuclear gene encoding mitochondrial protein	mRNA [NM_014161]";13	6509800208437;-0	0599356474434671;-1	23236828290585;0	249568254197023;0	377898852816686;0	138730031563062
1590;10;114;261;"TTCTCAGGAAGGGGTCTCGGCTGAGCATTAAAATAAAACGGTGCTTGGTTTTTGTACAGG";"A_21_P0001437";"XLOC_000617";"TCONS_00001327";"linc|BROAD Institute lincRNA (XLOC_000617)	lincRNA [TCONS_00001327]";5	99000435496844;-0	625758802785171;-2	29902094496481;0	0475629571716695;0	101949529465083;0	374265794540295
1591;10;115;3860;"CCGTCCACAAGATCTGCCACAGCAAAAGTGGGGAAATCAACCCAGTGAAGGTGAGCAACC";"A_24_P117672";"SCAF1";"NM_021228";"ref|Homo sapiens SR-related CTD-associated factor 1 (SCAF1)	mRNA [NM_021228]";8	92434859184194;0	133513283080477;1	47528990583969;0	174824561909854;0	288212811717747;0	105805487813634
1592;10;116;2215;"ATTCCTCCTGCTCATATTGTGATTCTCACTTTGGGGACTTTTCTTAAACCTTCAGTTATG";"A_23_P134454";"CAV1";"NM_001753";"ref|Homo sapiens caveolin 1	caveolae protein	22kDa (CAV1)	transcript variant 1	mRNA [NM_001753]";13	8440057641236;-0	589035591030024;-11	5740829672445;1	21773157380592e-06;1	5349311363563e-05;5	6.34869e+07
1593;10;117;2657;"CATGTAATTTGCATTACTCTGGTGGATTGTTCTAGTACTGTATTGGGCTTCTTCGTTAAT";"A_23_P76488";"EMP1";"NM_001423";"ref|Homo sapiens epithelial membrane protein 1 (EMP1)	mRNA [NM_001423]";14	3772932681281;0	0211395201675408;0	336602853395282;0	744265728066181;0	824996422071913;0	302863527688371
1595;10;119;171;"GTTCTGAAGGTGTTCCTGGAGAACGTGATTCGTGACGCTGTCACTTACACAGAGCACGCC";"A_23_P323685";"HIST1H4H";"NM_003543";"ref|Homo sapiens histone cluster 1	H4h (HIST1H4H)	mRNA [NM_003543]";10	7296929838626;0	716200210141853;6	76550518057623;8	93202637401141e-05;0	000496686726655758;0	182338117071058
1599;10;123;2992;"ACTTGAATTGTAATTCCCACAATTCCCACGTGTCATGGGTGGTGACTGAATTATGGGGGT";"A_33_P3300273";"C1orf52";"NM_198077";"ref|Homo sapiens chromosome 1 open reading frame 52 (C1orf52)	transcript variant 1	mRNA [NM_198077]";8	40649750472298;0	226830157196112;3	15039854435472;0	0119859396897732;0	0317203723076406;0	116448309346039
1600;10;124;548;"CTCCAGCCTTTAAACACGTAGGAGATCCTCAGCTATTTGTATGTGTAAAATGAAGGAAGA";"A_21_P0010235";"XLOC_013917";"TCONS_00029002";"linc|BROAD Institute lincRNA (XLOC_013917)	lincRNA [TCONS_00029002]";6	53259002873464;-0	22549912139098;-0	723321711942002;0	488170557037751;0	616511460518614;0	226326843120177
1602;10;126;1335;"TGTGTGGCCACATCTCTCAAAAGCCCCTCACAGCCCCAGGCACCAAAAGACAGAAAGGTC";"A_33_P3364289";"HSH2D";"NM_032855";"ref|Homo sapiens hematopoietic SH2 domain containing (HSH2D)	mRNA [NM_032855]";7	73066527750692;0	0351351914019773;0	271039372509452;0	792580585545628;0	86067500988251;0	315961454755883
1604;10;128;293;"CTGTTTCACTCAGCTCTTCTTCATCCACACCTTGTCTTCAATGGAGTCATCAGTTCTGTT";"A_23_P105118";"OR51G1";"NM_001005237";"ref|Homo sapiens olfactory receptor	family 51	subfamily G	member 1 (OR51G1)	mRNA [NM_001005237]";6	71863073942705;-0	0340828223350016;-0	266463499033201;0	795990756371863;0	863096655436571;0	316850462387543
1605;10;129;2317;"AACTTACCCTTGTGAGACAAGTTTTCTACTTGAGAAACTCCTAGTACAATGTCTTATACT";"A_24_P113686";"ZNHIT6";"NM_017953";"ref|Homo sapiens zinc finger	HIT-type containing 6 (ZNHIT6)	transcript variant 1	mRNA [NM_017953]";10	608277441124;-0	11767674643804;-1	53108506281805;0	160699399250999;0	269887097119;0	990779549149476
1606;10;130;3;"AAGAGGAGCACACCACACCAGAAACAGACATCTTGCAGTGTTTCACTGTCTCAACCTTAT";"A_33_P3419113";"PRY2";"NM_001002758";"ref|Homo sapiens PTPN13-like	Y-linked 2 (PRY2)	mRNA [NM_001002758]";6	54163342732448;0	349652173742678;0	780533203142145;0	45545995111196;0	586549592875895;0	215327574895939
1607;10;131;1555;"GAGACAGGTGGGCATTTTTGGGCTACCTGGTTCGTTTTTATAAGATTTTGCTGGGTTGGT";"A_23_P119196";"KLF2";"NM_016270";"ref|Homo sapiens Kruppel-like factor 2 (lung) (KLF2)	mRNA [NM_016270]";11	1786211939906;0	647412761735344;11	7298699952019;1	08906252412695e-06;1	41542940332816e-05;5	1.96167e+07
1612;10;136;1157;"TTTTCCCCTCCTGCTGCCATACTCACCCTGGGAGAGGCTGAAGATGACGGAGGCATTGAA";"A_21_P0000061";"CGREF1";"NM_001166241";"ref|Homo sapiens cell growth regulator with EF-hand domain 1 (CGREF1)	transcript variant 4	mRNA [NM_001166241]";8	36191322458593;0	0677859069219959;0	652598457040503;0	530610496523246;0	653765440620187;0	240003110716173
1613;10;137;1846;"GGAAAGCAAATAATGCCTACTACTCCGACTTTTATAGAAGCTACTTTTAAATCAGAATAT";"A_23_P28169";"ARL6IP6";"NM_152522";"ref|Homo sapiens ADP-ribosylation-like factor 6 interacting protein 6 (ARL6IP6)	transcript variant 1	mRNA [NM_152522]";11	383171104877;0	0845535861791884;1	11048773252828;0	296067890576856;0	42887529681581;0	157443937763782
1616;10;140;8101;"TGTTCCCAGGAAGAGGAAGTAAATCTGCAACCCTGGGGAGGACCCCAACTCACCTGGGAA";"A_23_P102832";"CEP250";"NM_007186";"ref|Homo sapiens centrosomal protein 250kDa (CEP250)	mRNA [NM_007186]";10	7069664551848;-0	223050446490593;-3	03763156723336;0	0143546827683774;0	0370317212992131;0	135946744119026
1617;10;141;1132;"ATGTTCCTGTTTCTTCATCGTTGAGCTTTTCTGGCCCGGTCTGAAGCTCAAGTGAGGAGG";"A_23_P315286";"C19orf22";"NM_138774";"ref|Homo sapiens chromosome 19 open reading frame 22 (C19orf22)	mRNA [NM_138774]";9	7335122875658;-0	141281609503473;-1	74549956305553;0	115447160276311;0	208104952817146;0	763971799796835
1618;10;142;852;"TTCACATGAGTTAGACAAAGAGAAAGAAGCAGGACATTCTAGGAAGAAGGAACGGCCCAG";"A_21_P0000799";"LOC100506054";"NR_038430";"ref|Homo sapiens uncharacterized LOC100506054 (LOC100506054)	transcript variant 1	non-coding RNA [NR_038430]";9	23681593508863;0	86902085757719;9	23943830545877;7	76908372079736e-06;6	76797818449537e-05;2	4.84585e+08
1621;10;145;1824;"GCTTGCCTGACAGTGTTCTTAAAACTGGTTGTCTTTTACTAGGACTCATAATGATTGTCC";"A_23_P3775";"OGFOD1";"NM_018233";"ref|Homo sapiens 2-oxoglutarate and iron-dependent oxygenase domain containing 1 (OGFOD1)	mRNA [NM_018233]";10	7742414445931;0	671350033192358;12	6755371148131;5	68142157017699e-07;8	51551682013487e-06;3	1.26122e+07
1624;10;148;218;"GTACATTGAAGAGTTGGTCTAATATTTGGCCTGGTGGATGGAGAAATTGCCTGTCTGCTC";"A_21_P0005657";"XLOC_006721";"ENST00000510244";"linc|BROAD Institute lincRNA (XLOC_006721)	lincRNA [TCONS_00015231]";8	45573887183299;-1	24447759931476;-14	6808903368643;1	63556572800759e-07;3	2813282498307e-06;1	2.04605e+07
1627;10;151;45;"TGAAGCTTCGTTGACTTTTGCTGATGGAGCCTCTCTGAAGGGCAAATTCAAAGTACAGCT";"A_21_P0007546";"XLOC_009723";"ENST00000551021";"tc|Q3P3H9_9GAMM (Q3P3H9) 4-hydroxybenzoate polyprenyl transferase	proteobacterial	partial (5%) [THC2681113]";6	7275929454165;0	152688451732586;1	6716595201772;0	129520983092322;0	227904863257358;0	836659032897508
1629;10;153;1789;"ACGGTAGTACCAACGCCTTGGCTTGATAATAAGCATACAGTATTTGGACGAGTGACTAAA";"A_23_P110433";"PPWD1";"NM_015342";"ref|Homo sapiens peptidylprolyl isomerase domain and WD repeat containing 1 (PPWD1)	mRNA [NM_015342]";11	3100291004554;-0	137636180462074;-2	732077859542;0	0235101136432975;0	0564762210392142;0	207329232913372
1631;10;155;1799;"GAAGCCAGTACTACAGAAGTTAGGTCAAGATGAAGACATGGATGTCAAATACTTTGCACA";"A_24_P107291";"PPP2R1B";"NM_181699";"ref|Homo sapiens protein phosphatase 2	regulatory subunit A	beta (PPP2R1B)	transcript variant 2	mRNA [NM_181699]";9	41522790471259;0	0131336629729581;0	232486198696434;0	821451230230077;0	881584145032646;0	323637384327286
1632;10;156;601;"GAGCTTGGGAGGTTGCTCCAGCTTATTTTAGGTTGTGCGATCAACTGTGAAAAGAAGCAA";"A_33_P3409844";"HOOK1";"NM_015888";"ref|Homo sapiens hook homolog 1 (Drosophila) (HOOK1)	mRNA [NM_015888]";5	9882998539274;0	293986470211373;3	06981865464966;0	0136329457735846;0	0353996768332084;0	129955363658525
1634;10;158;2126;"AAAGACATGTATAGGGACAGAAAGAAGATGAATGTTTCTGTAGGGCTGGGGCTGGAAATG";"A_33_P3827035";"LOC348840";"NR_003291";"ref|Homo sapiens uncharacterized LOC348840 (LOC348840)	non-coding RNA [NR_003291]";7	01998930254031;-0	134344384584734;-0	735578898620827;0	481038893851742;0	610090710761402;0	223969728749923
1639;10;163;361;"CTCCTGTGGCCTCCACGGTGCAACAAGCTAGCGGTTTACTTGGACCTCTGCCTCATCTTT";"A_32_P64038";"ENST00000447197";"ENST00000447197";"ref|PREDICTED: Homo sapiens hypothetical protein LOC100509156 (LOC100509156)	mRNA [XM_003119543]";11	641234731804;0	11956654472397;2	46559965661179;0	0362691873047559;0	0813056389736709;0	298480235570968
1640;10;164;793;"GTACCGATCGTAGCCCCTATGAGAAGGTTTCTGCAGGTAATGGTGGCAGCAGCCTCTCTT";"A_23_P137856";"MUC1";"NM_002456";"ref|Homo sapiens mucin 1	cell surface associated (MUC1)	transcript variant 1	mRNA [NM_002456]";6	84009860635388;-1	12799099885968;-10	3543156443601;3	0656764113588e-06;3	19370239292736e-05;1	1.72437e+08
1641;11;1;388;"TATTAATGCCTATACAGAAGTGGGGAGAAGGTTCAGGGTTGGAGGAAGAGTAGGACAAAC";"A_21_P0001196";"XLOC_001095";"ENST00000421851";"linc|BROAD Institute lincRNA (XLOC_001095)	lincRNA [TCONS_00000685]";6	2781798698588;-0	0117023078876368;-0	124436022113804;0	903752447640773;0	937790331648396;0	344271175578896
1642;11;2;907;"GCATGTGTTAACCTATTAATTAAATCTACAAATGACTGGCTGTACCCATGAAGTGAGTTA";"A_19_P00810751";"Q2Z8W5";"THC2770336";"tc|Q2Z8W5_9GAMM (Q2Z8W5) Thiolase	partial (5%) [THC2770336]";6	24774592572902;1	00612226370971;2	21973407818831;0	0540966218708813;0	113313108885306;0	415982505768356
1645;11;5;544;"TATTATTCTTGGGCACTCTACTCCAAGTAGGAAAAGGCCAGGAGGTCCTGTTAAAGGATG";"A_33_P3402056";"LOC389831";"NM_001242480";"ref|Homo sapiens uncharacterized LOC389831 (LOC389831)	mRNA [NM_001242480]";8	08526559149945;0	818718608447982;8	0910591467264;2	2438447081757e-05;0	000161284169553482;5	9.20885e+08
1646;11;6;870;"AGGCTGGTGAACGCGTGCCTAGCAGAAGAGCTCCCGCACATCCATGCCTTTGAACAGAAA";"A_32_P53486";"BOLA2B";"NM_001039182";"ref|Homo sapiens bolA homolog 2B (E. coli) (BOLA2B)	mRNA [NM_001039182]";14	1144920977557;0	0659653740741799;1	31912771331007;0	220257454938578;0	344372990959258;0	126422389348768
1647;11;7;1719;"ATGCTCGTTTTGCAGAGAAGGCAGTGTTCCTCTATTCCCTTCTTCCGAATTAAAAATACC";"A_23_P126613";"AQP10";"NM_080429";"ref|Homo sapiens aquaporin 10 (AQP10)	mRNA [NM_080429]";6	33467942284969;0	129423905452441;0	665556736371657;0	522671948260316;0	646459500923091;0	237321035242216
1648;11;8;2223;"GAGCTGCGCCATCTTTATCTGGGGCTATTTTGCTTAGTGTGGGGTGAACCCAGGGGTCCA";"A_23_P37914";"SLC5A11";"NM_052944";"ref|Homo sapiens solute carrier family 5 (sodium/glucose cotransporter)	member 11 (SLC5A11)	mRNA [NM_052944]";6	80442456903505;-0	869594977018467;-10	2967451777977;3	20959485743467e-06;3	30088726469312e-05;1	2.11785e+08
1650;11;10;1377;"TCTCTGTGCAGAGAAAAGATGTGAGTCCGCTTGATGAATTCTAATGCTTTGCTTAGAGCT";"A_23_P61426";"MSRA";"NM_012331";"ref|Homo sapiens methionine sulfoxide reductase A (MSRA)	transcript variant 1	mRNA [NM_012331]";11	832628663094;-0	648507013659513;-10	1029309522246;3	75177432511001e-06;3	73090537027318e-05;1	3.69649e+08
1651;11;11;4139;"ATGGGGCTCAGGGCCTCTTTACCATGTGCAGTGACCATTTCTCAGAGCAGGACTTGCAAA";"A_32_P194072";"TECPR1";"NM_015395";"ref|Homo sapiens tectonin beta-propeller repeat containing 1 (TECPR1)	mRNA [NM_015395]";9	74365537985856;-0	0293797026647979;-0	388885587865937;0	706557776500214;0	79647620570694;0	292393502476578
1655;11;15;1041;"CCCAGGTCTCACTCCAGAACATAAAAATGGTGTGTGATCAAATGGTATATATTAGAAATT";"A_33_P3300395";"APITD1";"NM_199294";"ref|Homo sapiens apoptosis-inducing	TAF9-like domain 1 (APITD1)	transcript variant A	mRNA [NM_199294]";11	3056911605703;0	248007993088827;4	40202339450466;0	00178943924965914;0	00623070277580945;0	228734643226718
1657;11;17;3027;"TACAGTGTAACATTGTGTCAACATTTGCAGATTGACTGTATATGACCTTAATCTTTGTGC";"A_23_P114164";"UBQLN2";"NM_013444";"ref|Homo sapiens ubiquilin 2 (UBQLN2)	mRNA [NM_013444]";10	3978573233476;-1	02252620632433;-13	2429462814692;3	92566241384434e-07;6	36732945955195e-06;2	3.37503e+07
1660;11;20;573;"TCATTTTGTCACAAACTTTGCCCAGGGCTCCGACTCTCGCATCAGCTAAACCCTCTGAAC";"A_21_P0006231";"XLOC_007585";"TCONS_00016184";"linc|BROAD Institute lincRNA (XLOC_007585)	lincRNA [TCONS_00016184]";7	22589207947305;0	649998449851497;2	4664113425843;0	0362212743732405;0	0812063343862433;0	298115679594005
1662;11;22;747;"AAGGAAAAGTTGCAATCTCTTCAGACCTCTATCATCAAAAAGGAGGCCCAGTGCATTATT";"A_21_P0003180";"XLOC_003264";"TCONS_00006668";"linc|BROAD Institute lincRNA (XLOC_003264)	lincRNA [TCONS_00006668]";6	07126588896348;0	545648371888887;2	16329077097498;0	0592754315016535;0	121915082814982;0	447561117501996
1663;11;23;2756;"AAAGCCGAGTTATAAAGCTCTTAATTACATCTCAATTGGTATCAGCAATAGACCTAAAGG";"A_24_P403303";"PHF20L1";"NM_198513";"ref|Homo sapiens PHD finger protein 20-like 1 (PHF20L1)	transcript variant 3	mRNA [NM_198513]";6	39977567874603;-0	334305534491206;-4	317777338025;0	00202029656690018;0	00692070933817837;0	25406539812652
1664;11;24;3860;"CTGTAAAGCCCCATCTTGGAACAGTCAGCACCTTTCATGCTCTTGTCAGTGTTTCCTTTT";"A_23_P11160";"MAP7D3";"NM_024597";"ref|Homo sapiens MAP7 domain containing 3 (MAP7D3)	transcript variant 1	mRNA [NM_024597]";10	1559155368331;0	227981996917945;4	70161995898224;0	00117204328331238;0	00435624311122573;0	159921560971204
1668;11;28;626;"TGACATGGGTCTGGTCTTTGCTTCCTATTCTTTGATTATTCACTCAGTGCTGAAGCTGAA";"A_23_P370147";"ENST00000316517";"ENST00000316517";"ens|HCG2044188Seven transmembrane helix receptorUncharacterized protein [Source:UniProtKB/TrEMBL;Acc:Q8NH77] [ENST00000316517]";7	00525848115775;-0	081889250779887;-0	312840269039852;0	761653255231255;0	838092041488863;0	307671046106355
1669;11;29;3949;"AACCCAGTGGGGTCACGTAAAGGAATTGCAGGTCGGTGAGAGGACAAGAGGGACTCCCAT";"A_23_P354591";"FAM125B";"NM_033446";"ref|Homo sapiens family with sequence similarity 125	member B (FAM125B)	transcript variant 1	mRNA [NM_033446]";6	05130935121152;-1	12752219553886;-7	89415356969095;2	72365231409063e-05;0	000188488454768681;6	9.19579e+08
1670;11;30;225;"CTGTTATTACCTTCGGAGCCAACAGGGGCTGCTCGTTTACCCACAGACAGTCGGAAAAAA";"A_21_P0008435";"XLOC_011016";"TCONS_00022740";"linc|BROAD Institute lincRNA (XLOC_011016)	lincRNA [TCONS_00022740]";6	79181465602704;0	377799903567066;4	56354069347365;0	00142211886393776;0	0051373804492049;0	188597807735442
1671;11;31;1195;"ATTGATGAGTCCTTGCTTGAGTCTATGCCTCCACCCAGTAGTTTGTTCTTAGTCTCCTAG";"A_21_P0005720";"XLOC_006844";"TCONS_00014759";"linc|BROAD Institute lincRNA (XLOC_006844)	lincRNA [TCONS_00014759]";7	21077609569177;0	0428220436266562;0	17843341911435;0	862403026297254;0	90925002903629;0	333793776527046
1672;11;32;1104;"GCATCAGCGATGAGGTTTATGAATGGCTTGTATATTCTGGAAATAAGCACTTAAAAATAG";"A_33_P3318696";"CCBL2";"NM_001008661";"ref|Homo sapiens cysteine conjugate-beta lyase 2 (CCBL2)	transcript variant 1	mRNA [NM_001008661]";8	72254124098479;0	0825815575973827;0	867819407425937;0	408423679412003;0	543124674717066;0	199385901027666
1679;11;39;2654;"ATATTCCTCCTGTTGATATTGCTGCTTTTGGAAGTTCCAACAATGACTTTATTTTGCATC";"A_23_P10873";"TLR1";"NM_003263";"ref|Homo sapiens toll-like receptor 1 (TLR1)	mRNA [NM_003263]";6	84782910654651;-0	0785597862506044;-1	4303527506699;0	186981665340926;0	303632833391189;0	11146631498343
1680;11;40;1040;"TTTTTTATTGTAAAAAGAAAAATCAACTCACTGTTCAGTGCTGAGAGGGGATGTAGGCCC";"A_23_P201086";"ARF1";"NM_001024227";"ref|Homo sapiens ADP-ribosylation factor 1 (ARF1)	transcript variant 1	mRNA [NM_001024227]";11	1589028146949;0	00513848110809612;0	0402945506745714;0	968753272367181;0	980372534547649;0	359903481176562
1683;11;43;69;"ACAGCTGAATTGATGATATGATGACAGGCTCATCCCTCCATTGTAAACTATGCTGCGTAA";"A_21_P0011051";"XLOC_l2_003053";"ENST00000551082";"linc|BROAD Institute lincRNA (XLOC_l2_003053)	lincRNA [TCONS_l2_00005764]";6	49034364738829;0	245201372517808;2	13010380985858;0	0625425872754446;0	127437501331211;0	467834407281799
1684;11;44;4334;"GCAGAGAAAAGGAGAGTTTTACATAGACCCCAGGAAAAACAGTACTAACCTGGTTGATGG";"A_23_P378690";"TMEM64";"NM_001008495";"ref|Homo sapiens transmembrane protein 64 (TMEM64)	transcript variant 1	mRNA [NM_001008495]";8	44173121892267;-1	18430762147584;-15	0813210402769;1	29992094292657e-07;2	75075597640689e-06;1	982700
1686;11;46;2264;"AAGGAAATATCTTTATAGATGTCTTCTTGTGTACCTGTGTAAGAATTCCTTTGGGATATA";"A_24_P66337";"LCLAT1";"ENST00000319406";"ens|lysocardiolipin acyltransferase 1 [Source:HGNC Symbol;Acc:26756] [ENST00000319406]";6	45707205209646;0	0462795596767549;0	240169377706046;0	815673302229295;0	877367499145519;0	322089416100732
1687;11;47;5602;"TCAACAGTAATTCCACTCCCATGAAACTTTGGTCATTGTTATGCATTAAGTGGGGCTTAT";"A_23_P31858";"ST18";"NM_014682";"ref|Homo sapiens suppression of tumorigenicity 18 (breast carcinoma) (zinc finger protein) (ST18)	mRNA [NM_014682]";6	25761273082762;-0	0460646112931959;-0	46609840308971;0	652411517050235;0	75322315176968;0	276514921493361
1689;11;49;546;"CAGGGTCTTTATTGTTGAAACTCTTGCGTAATGACATCTTTATTCAGGTGAAAATACAGG";"A_21_P0000876";"LOC100505894";"NR_039993";"ref|Homo sapiens uncharacterized LOC100505894 (LOC100505894)	transcript variant 1	non-coding RNA [NR_039993]";9	14071064844325;0	0684785894891426;0	403016064358927;0	696505105094948;0	788559654106397;0	289487265939399
1692;11;52;2212;"TTGCTTCAGATTTTCAGAACTGGGAAGATTTACTGGTGTAACTGGGTTGTTTTTGATGGA";"A_23_P12874";"GTPBP4";"NM_012341";"ref|Homo sapiens GTP binding protein 4 (GTPBP4)	mRNA [NM_012341]";13	1357220553258;-0	031154841580884;-0	641839806115613;0	537255937001884;0	659605294867852;0	242146973175833
1693;11;53;3101;"CCAGACCCCTGTGGACCAGCTCCTGCAGGACGGGCTCCAGCTGCGCTCCTGCACATTCCA";"A_33_P3238410";"SBF1";"NM_002972";"ref|Homo sapiens SET binding factor 1 (SBF1)	mRNA [NM_002972]";6	98767526008724;0	0931262759997731;1	03345890123306;0	328821192790325;0	463286601750993;0	170076634010944
1694;11;54;809;"TGGTCTTCTCCCTGGCTCAGCAAGAAGATGAACTTTAAACACTGAGAAACTGGTCATCTC";"A_21_P0010183";"LINC00320";"NR_024090";"ref|Homo sapiens long intergenic non-protein coding RNA 320 (LINC00320)	non-coding RNA [NR_024090]";7	06790642951495;-0	0124105454961505;-0	0518096088430529;0	959831729809945;0	974639611729288;0	357798874196118
1697;11;57;72;"TGGTTTTACTTTACTCACAGGACTATTGTTAGATCTGTGGGAAGGAATTACAAGACAGTT";"A_21_P0000315";"SNORA18";"NR_002959";"ref|Homo sapiens small nucleolar RNA	H/ACA box 18 (SNORA18)	small nucleolar RNA [NR_002959]";9	97255598237888;0	456987081855836;4	36218997991672;0	00189486459619431;0	00654467561506201;0	240260865541179
1698;11;58;3634;"CACGCACTATGATGAAGAACATCTTGGGCCATGCATTCTATCAGCTCATTGTCATCTTTA";"A_23_P11841";"ATP2B4";"NM_001684";"ref|Homo sapiens ATPase	Ca++ transporting	plasma membrane 4 (ATP2B4)	transcript variant 2	mRNA [NM_001684]";5	97116334296259;0	144463669431482;2	31423511303723;0	0464011414474315;0	0998387758610823;0	366517030236771
1699;11;59;570;"TTCCAGATGTTCCTGTGGACCCCAGTCCAGGAAACAGAGATGGAAAGGCCAGGAAGAGAC";"A_21_P0013456";"XLOC_l2_014048";"TCONS_l2_00027518";"linc|BROAD Institute lincRNA (XLOC_l2_014048)	lincRNA [TCONS_l2_00027518]";6	94381217335705;-0	374814531906963;-4	0975922465212;0	00278766994798337;0	00915193010876401;0	335975498043563
1700;11;60;1271;"ACCCAGGATAGAGTCAGTGACCACAGGATAGCATATGAAGTTCGTGATATTAAGGAATTT";"A_23_P37005";"MTRF1";"NM_004294";"ref|Homo sapiens mitochondrial translational release factor 1 (MTRF1)	nuclear gene encoding mitochondrial protein	mRNA [NM_004294]";9	6036448929152;0	011589286804373;0	237649889802244;0	817566734369402;0	87855798811218;0	322526455193837
1703;11;63;1657;"TGAGCTATACTTTTTAAGAAAGTGATTCACCCTGCCTTTGCCCCCTTCCCCAGAACAGAA";"A_33_P3227252";"THC2481163";"THC2481163";"Unknown";11	4146401327038;0	187370142914681;2	3300735200504;0	0452214098164935;0	0976726604399464;0	358565027776229
1706;11;66;6061;"AAGCATATTAAAGCTCACGTGTTAATCAGTGCATTCTTATGCTCCTACATTAAATGCCTT";"A_24_P795594";"ALG9";"NM_001077691";"ref|Homo sapiens asparagine-linked glycosylation 9	alpha-1	2-mannosyltransferase homolog (S. cerevisiae) (ALG9)	transcript variant 3	mRNA [NM_001077691]";9	1596671448961;0	301880754664797;4	76567149344003;0	00107248614888731;0	00403845123697561;0	148255138483653
1708;11;68;2120;"TACAGACAAGGAAGTGGTGTCAAATGGACAGTAAAGGTGAATCACATACTCAGCTATAGC";"A_24_P298495";"LOC100130744";"AF289590";"gb|Homo sapiens clone pp7583 unknown mRNA. [AF289590]";5	96862431335185;-0	0183908620767514;-0	102183390125903;0	920890428077513;0	949328997166017;0	348507122366042
1709;11;69;4891;"TGGAGCTGCAGACAGAGGCTTTTGTGAGTGCGAGGCTTGCTCCTATCCCGGGAGCTTCTG";"A_19_P00320842";"C17orf51";"NM_001113434";"ref|Homo sapiens chromosome 17 open reading frame 51 (C17orf51)	mRNA [NM_001113434]";7	74027985870609;0	0441785336646578;0	276944458633057;0	788186724304012;0	857495141421383;0	314794096748071
1710;11;70;995;"ATCATCGTCAACACCAGCAAGAAGACGGTCATCGACTGCAGCATCTCCAATGACAAATTT";"A_32_P199301";"TFDP1";"NM_007111";"ref|Homo sapiens transcription factor Dp-1 (TFDP1)	transcript variant 1	mRNA [NM_007111]";9	44975538674036;0	123776204790904;1	29142155503453;0	229287523337716;0	354683098639989;0	130207321621797
1711;11;71;1180;"AGGTGAGAAAATACCACCCAGGACCTGACTGAGACCCCATCCGGCATCAGTCCACGTGAA";"A_19_P00330048";"XLOC_009628";"TCONS_00020284";"linc|BROAD Institute lincRNA (XLOC_009628)	lincRNA [TCONS_00020284]";6	59722779553751;-0	0312057386682714;-0	476991530749917;0	644933935796428;0	747729285701436;0	274498074373106
1712;11;72;294;"ATTAGCCAGGCCACCAACACAGCCACCACGTTCTGCATCTTCTATAGCATGGTGGCCACA";"A_24_P195272";"NP450512";"NP450512";"tc|GB|AB083591.1|BAB89304.1 putative G-protein coupled receptor [Homo sapiens] [NP450512]";7	55395827877872;-0	791834797417846;-1	24592924422774;0	244784504479622;0	372618985532367;0	136791745300633
1713;11;73;704;"ACTTCCTCTGTTATGCCAGATATGGTTAGCCACTTTGGTTTTTTAGGAGCTATAGGATGG";"A_21_P0013271";"LOC100287482";"NM_001195243";"ref|Homo sapiens uncharacterized protein LOC100287482 (LOC100287482)	mRNA [NM_001195243]";7	3429843112695;-0	887697729990919;-4	72939498535074;0	00112770177738396;0	00421235556543424;0	154639321128347
1714;11;74;834;"GAGTCGTCGAAAACGTTGACGTGTTATAGATAAGCCTTGTCATTCTGTATCAAAAATCTG";"A_23_P11774";"UTP11L";"NM_016037";"ref|Homo sapiens UTP11-like	U3 small nucleolar ribonucleoprotein	(yeast) (UTP11L)	mRNA [NM_016037]";11	8638977389815;0	243559926645952;5	07148920577966;0	000707765509205815;0	0028293036131979;0	103866253267202
1715;11;75;596;"TGTGATTTTGGGCCCAGGCAGGGACCCCTCTGGGCTCTGTTACTGGAGAAAAGGCAAATG";"A_33_P3223535";"ENST00000428928";"ENST00000428928";"ens|Uncharacterized protein ENSP00000382042 [Source:UniProtKB/Swiss-Prot;Acc:A8MWP6] [ENST00000428928]";6	36522785026798;0	213628107090047;0	824525399466247;0	431316652657016;0	565144385752095;0	207469532888758
1716;11;76;3592;"AAATCTTAACTCTGCTACATGGCTCTGACTGCTGTGGGGGATTGAAAAGAATATGCTTAT";"A_23_P123672";"TDRD7";"NM_014290";"ref|Homo sapiens tudor domain containing 7 (TDRD7)	mRNA [NM_014290]";11	2007535548302;-0	582412187256804;-10	3358746560777;3	1109850812759e-06;3	22316483951894e-05;1	1.83252e+08
1717;11;77;4320;"GATGCGAATTAGTAAAAGCTAAATTCAAAAGTAGAATGGGCATCTCCAAAGAGTACGATA";"A_33_P3283900";"CTNS";"NM_004937";"ref|Homo sapiens cystinosin	lysosomal cystine transporter (CTNS)	transcript variant 2	mRNA [NM_004937]";6	72212470061222;-0	0616755944320397;-1	00170471373612;0	34310419822036;0	478052177811361;0	175497208372664
1719;11;79;3088;"CTGTGTTTGGTAGTTTTTCCTAGTACTCTCCTTAATAATGGTGGTGTTTAGCAAATTGTA";"A_33_P3287562";"BCAP29";"NM_018844";"ref|Homo sapiens B-cell receptor-associated protein 29 (BCAP29)	transcript variant 2	mRNA [NM_018844]";10	5763109966902;-0	0708010393663923;-0	960327850638757;0	362408214999273;0	497657752084053;0	182694589146355
1721;11;81;1117;"CTATAATCCTCCAAATCAAAGCTCTTTCTGCTTGTGCAAGATTGTTCCTATTAAACAGTT";"A_23_P106859";"COX4NB";"NM_006067";"ref|Homo sapiens COX4 neighbor (COX4NB)	transcript variant 1	mRNA [NM_006067]";12	5359605204111;-0	233221905620081;-4	50315477331882;0	0015489863841757;0	00552253288752205;0	202737096469999
1722;11;82;10697;"CCCCATGAATGAGGGATAAAGTTTCACTCTTGGTATTTTCTAACTAGTGCTAGGGAAAGT";"A_23_P307544";"PLXNA2";"NM_025179";"ref|Homo sapiens plexin A2 (PLXNA2)	mRNA [NM_025179]";6	3080156502165;0	575541579321598;3	9468347291344;0	00348897394623759;0	0110746874718806;0	406561631789427
1723;11;83;1867;"CAGGAGCCCCGGCCACACACAGCAAGAAAGATACATCTGACCAGCCTCAACGTCAACGTA";"A_24_P22939";"ADAMTSL5";"NM_213604";"ref|Homo sapiens ADAMTS-like 5 (ADAMTSL5)	mRNA [NM_213604]";8	62268977674094;-0	358988114402898;-2	69453171602012;0	0249882156223536;0	0594236460779884;0	218149492504296
1725;11;85;1725;"AAGGCGCAGAGATTGGAGTGCCCTGCGGAGTTGCACACTGGGTGGGAAGCACTCAAATAA";"A_23_P148737";"MYBPH";"NM_004997";"ref|Homo sapiens myosin binding protein H (MYBPH)	mRNA [NM_004997]";6	07425916798551;-0	202769129748878;-2	57423796308031;0	0303883662796502;0	070135381688241;0	257473227102304
1728;11;88;1352;"GATAAGATGTGGTTTGAAGCTGATGGGTGCCAGCCCTGCATTGCTGAGTCAATCAATAAA";"A_23_P206760";"HP";"NM_005143";"ref|Homo sapiens haptoglobin (HP)	transcript variant 1	mRNA [NM_005143]";6	56218326480809;0	218477769042305;3	09292335419181;0	0131380532642313;0	0342944965966065;0	125898148666634
1729;11;89;2513;"CATTTAATGGACAGTGATTCTAACAGTATAAAGTTCACAATATTCTATGTCCCTAGCCTG";"A_24_P77676";"HSPA9";"NM_004134";"ref|Homo sapiens heat shock 70kDa protein 9 (mortalin) (HSPA9)	nuclear gene encoding mitochondrial protein	mRNA [NM_004134]";12	5353880695539;0	410978797907937;6	14894757829403;0	000181692359924956;0	000895045615364822;0	328579209871736
1730;11;90;813;"TTAAATTGTGCACCCAAGGTGCCTCAGCTGCCTTACTCTAGACTGGCCCCGTTAACTCCC";"A_33_P3877728";"SMCR6";"BX647090";"gb|Homo sapiens mRNA; cDNA DKFZp686J19223 (from clone DKFZp686J19223). [BX647090]";9	75266415664029;0	746432001237599;11	0035304515128;1	85461165685452e-06;2	13605594551104e-05;7	8.41651e+07
1731;11;91;571;"CAAACATTTTTAGGTATGTAGAAACAATGTATACACACACATGCACACACACATTAGTGC";"A_21_P0003374";"XLOC_003560";"ENST00000507344";"linc|BROAD Institute lincRNA (XLOC_003560)	lincRNA [TCONS_00007546]";6	65990789776675;-0	226201666502153;-1	24279976498944;0	245881694366113;0	373794072406534;0	137223130148529
1732;11;92;2073;"AGGCTTAAGACAGATTATAGACCTCCTTAAGAGATGAGTTTCTTCTTCTAAAAATGCATG";"A_23_P314805";"TMEM56";"NM_152487";"ref|Homo sapiens transmembrane protein 56 (TMEM56)	transcript variant 2	mRNA [NM_152487]";7	4203781735431;-0	992862946971757;-12	2888161677905;7	37314025684116e-07;1	04615367489043e-05;3	8.40523e+07
1733;11;93;4877;"GGAGTTGTTGGCTTGTCAAGTTTTGCAAAATAATGCCAGGTATTTTCCAAAATGATGATA";"A_33_P3352877";"SPG20";"NM_015087";"ref|Homo sapiens spastic paraplegia 20 (Troyer syndrome) (SPG20)	transcript variant 1	mRNA [NM_015087]";7	47378066468114;-0	149105078593905;-1	41973775324016;0	189958534005269;0	307122685699282;0	112747470819823
1734;11;94;4584;"AAATCAACCCTGCAATCACTTTTTGGAATTGTCTTGATTTTTCGGCAGTTCAAGCTATAT";"A_23_P206359";"CDH1";"NM_004360";"ref|Homo sapiens cadherin 1	type 1	E-cadherin (epithelial) (CDH1)	mRNA [NM_004360]";5	82848700554562;-1	30321875091461;-21	6891602927007;5	65434280889673e-09;2	92534970402406e-07;1	739219
1737;11;97;1585;"CAAATTTCTCCTTCCACTCGTCCGCACGGTACGTCTTCATGGGAGTCATTTTATTCCTTA";"A_23_P11262";"F8A1";"NM_012151";"ref|Homo sapiens coagulation factor VIII-associated 1 (F8A1)	mRNA [NM_012151]";13	3184611952385;0	127677065712575;1	96894457997168;0	0810440249012503;0	157193461594975;0	577071185213586
1738;11;98;2178;"ACCTTGCAGCAGGAAGGTCTCCTCTCCCGTTACAAGCAGCAGCGACTGTTGACAGTTCTT";"A_23_P145330";"CCHCR1";"NM_019052";"ref|Homo sapiens coiled-coil alpha-helical rod protein 1 (CCHCR1)	transcript variant 3	mRNA [NM_019052]";11	0177959549959;0	963982943994349;1	2193576724247;0	25422980720676;0	383209315570413;0	140679549694562
1739;11;99;2232;"CTGCTCCACTTTTTCTACCTTGGAACTGTATTAGATAAAATCACTTCTGTTTGTTCAGTT";"A_33_P3295283";"LPCAT3";"NM_005768";"ref|Homo sapiens lysophosphatidylcholine acyltransferase 3 (LPCAT3)	mRNA [NM_005768]";10	7856516652562;1	079035319734;1	53967190936405;0	158617720063068;0	26706500940527;0	980419414031802
1740;11;100;4634;"TCAGCCAAGTATTGGTATTCTTCCTCATTCGGTATAAGGCAGCTTTCAATTTGCTTAGAA";"A_33_P3262833";"GOLGA8E";"NR_033350";"ref|Homo sapiens golgin A8 family	member E (GOLGA8E)	non-coding RNA [NR_033350]";8	18339532120182;-0	128231381021754;-0	358474703524409;0	728395955733881;0	81328829171494;0	298565368850733
1741;11;101;2772;"AAGTGAATGTATTGGCTTAGCCAAATCACTACAGAAGGTGGTTCCTAAATACCTTTTAGT";"A_33_P3651911";"LOC286109";"AK092172";"gb|Homo sapiens cDNA FLJ34853 fis	clone NT2NE2012199. [AK092172]";7	78141271953122;0	884539062724931;3	73551463308278;0	00480376578151116;0	0144946256773586;0	532110606509345
1742;11;102;0;"GGACGTCCATGTTGCCTTTTCAGAACATTCTCTTCATTTTTCTCCTCTCAGTTTGACCAT";"A_33_P3387493";"A_33_P3387493";"A_33_P3387493";"Unknown";6	83982538206139;0	223494534572652;2	1972268790121;0	056106481713597;0	116704395042744;0	428432219022418
1743;11;103;2327;"TTTTACATCGGGTTTGTTCTCCTTCCATGGTGTGTTGCTGACATTGTCACTGAGTCCCAT";"A_23_P168868";"PTDSS1";"NM_014754";"ref|Homo sapiens phosphatidylserine synthase 1 (PTDSS1)	mRNA [NM_014754]";14	3711277380884;-0	158219673420639;-1	63956055712924;0	136114382902439;0	237239930769673;0	870928896406594
1745;11;105;1263;"AGTTGGCTCTTTTGTGTCATCTTACCCTTTACAGAGAAATTAAATGGCCTTGGTGGGACC";"A_23_P377214";"HEXIM2";"NM_144608";"ref|Homo sapiens hexamethylene bis-acetamide inducible 2 (HEXIM2)	mRNA [NM_144608]";11	8409603098134;0	108914883998608;2	07416306498648;0	0684488201317331;0	137230268010664;0	50378452516134
1746;11;106;25;"TCATAGGTGCTTGTGTCCGTGGTGAGAAGGGTGATGGAGAGAAGTGGCTGCAGTTCCCAC";"A_33_P3397613";"ENST00000447623";"ENST00000447623";"tc|Q53FK6_HUMAN (Q53FK6) Thrombospondin 3 variant (Fragment)	partial (4%) [THC2525119]";6	9014424658848;0	093805520766181;0	794753919775412;0	447558837926594;0	57929544704681;0	212664513411811
1747;11;107;1112;"AGCCTTGTGCCGTGCACTATGACTTTGTGGGCTCCTATGAGAGGCTGGAGGCTGATGCAA";"A_24_P210637";"CHST14";"NM_130468";"ref|Homo sapiens carbohydrate (N-acetylgalactosamine 4-0) sulfotransferase 14 (CHST14)	mRNA [NM_130468]";7	35173639277423;-0	0689092969108938;-0	956082113340416;0	364433576947634;0	499785735106203;0	183475790649424
1749;11;109;195;"ACTGGAACTTATGCTGTAGACATTTCTTTGTGGTTTATCTAAAAACCAAAGAGAGTGGGT";"A_21_P0008857";"XLOC_011535";"TCONS_00024175";"linc|BROAD Institute lincRNA (XLOC_011535)	lincRNA [TCONS_00024175]";7	45353836730779;0	364219285147085;5	07228325408406;0	000707014562673991;0	00282665282977377;0	10376894064893
1752;11;112;1202;"TTCAAGGCAGGAAAAAAGGGTATTTAATGCTCTGTCAAGCACATCAGCAATCATAGATTA";"A_23_P215778";"DUS4L";"NM_181581";"ref|Homo sapiens dihydrouridine synthase 4-like (S. cerevisiae) (DUS4L)	mRNA [NM_181581]";8	12678540114353;0	319133810254228;3	57002443187178;0	00619612911413656;0	0180248991948033;0	661710088712307
1753;11;113;865;"GATGGAGGTATATGTACAAGACTATGAAGACTTCATGTGACATTTTATCTTTTCCTGGTG";"A_21_P0012407";"EIF3J";"NM_003758";"ref|Homo sapiens eukaryotic translation initiation factor 3	subunit J (EIF3J)	mRNA [NM_003758]";10	715621632582;-0	0377934505466797;-0	6251941181293;0	547634082205941;0	668468325907307;0	245400670737186
1754;11;114;1710;"TGAAGGCAAACTTACCAACACAAATAAGCAAAGTGGTTGCAATAAAGACAGATACGTCCC";"A_33_P3407638";"C11orf46";"NM_152316";"ref|Homo sapiens chromosome 11 open reading frame 46 (C11orf46)	mRNA [NM_152316]";10	9045628727836;-0	271696167160282;-4	34014692447038;0	00195604495070771;0	00672423101311548;0	246852503979245
1756;11;116;2149;"CCTGCTAGAACAGTCTCTTGAGGCACAGAAACTCCTGTTCATGCCCATACCCCTGGCCAA";"A_23_P67932";"CXCR1";"NM_000634";"ref|Homo sapiens chemokine (C-X-C motif) receptor 1 (CXCR1)	mRNA [NM_000634]";5	96693199386972;0	178594443015224;1	1446800136932;0	282374980865469;0	414121254135891;0	152027597408653
1757;11;117;1192;"AACCGTCTGAGTCTTGTGCTCTTCAAGACAAAACAGATTGCGTCGCTGACAAGTTCTCAA";"A_23_P103720";"AGMAT";"NM_024758";"ref|Homo sapiens agmatine ureohydrolase (agmatinase) (AGMAT)	mRNA [NM_024758]";7	93180104909659;-0	607516786109602;-10	3327198610593;3	11881012320335e-06;3	23023204907254e-05;1	1.85847e+08
1759;11;119;2217;"ACCTACCATTGTGGAAAAGGTGATTCTTCCTAAACTAACAGTGATAGCTGAAAATATGTG";"A_23_P211056";"GCFC1";"NM_013329";"ref|Homo sapiens GC-rich sequence DNA-binding factor 1 (GCFC1)	transcript variant 2	mRNA [NM_013329]";7	84857983154227;0	0913420365688662;0	975556859391967;0	355211757594926;0	490188874282976;0	179952697644539
1761;11;121;1941;"AGGAGAAGATACCTTCTCACACCCTACCTCCTTTTATAGACTTTAGGAGCAATGTCTTTG";"A_21_P0008024";"LINC00442";"NR_026852";"ref|Homo sapiens long intergenic non-protein coding RNA 442 (LINC00442)	non-coding RNA [NR_026852]";6	71739326746465;-0	00192161404626834;-0	0124614524238632;0	990334036139271;0	99389644751327;0	36486822996739
1762;11;122;1823;"GAAGGAAAGAATAGTTTTACCCATGCTGAAGTTAATTTAAACCTTCACCTAGAGAAGCAA";"A_19_P00317082";"HCG18";"NR_024052";"ref|Homo sapiens HLA complex group 18 (non-protein coding) (HCG18)	non-coding RNA [NR_024052]";11	8975240785998;0	568383494863125;9	82427384090253;4	71707262748521e-06;4	49497770661753e-05;1	6.50146e+08
1763;11;123;262;"GGACGTCTGGAACATGCGACTTGTCTTCTTCTTTGGCGTCTCCATCATCCTGGTCCTTGG";"A_23_P22765";"NDUFB11";"NM_019056";"ref|Homo sapiens NADH dehydrogenase (ubiquinone) 1 beta subcomplex	11	17.3kDa (NDUFB11)	nuclear gene encoding mitochondrial protein	transcript variant 1	mRNA [NM_019056]";13	9385844918772;-0	79972737382381;-15	4343856590459;1	06657711540124e-07;2	37525616426379e-06;8	7.19777e+06
1764;11;124;207;"ACGAGCCGGTGGCAGCTGCCAACAAGAAGCATTGGAACAAACCATGCTGGGTTAATACAT";"A_21_P0012112";"XLOC_l2_008560";"TCONS_l2_00016171";"linc|BROAD Institute lincRNA (XLOC_l2_008560)	lincRNA [TCONS_l2_00016171]";17	3028788804229;-0	190039520504744;-3	52178525488794;0	0066776129694766;0	0192308560370286;0	705981837498682
1765;11;125;907;"TGGGCAGGCCCAGCTTATAAGTTAAAGGGCATCACAGTGAGGGTGTAGTAGATAAATTCA";"A_23_P120194";"ORMDL1";"NM_016467";"ref|Homo sapiens ORM1-like 1 (S. cerevisiae) (ORMDL1)	transcript variant 1	mRNA [NM_016467]";12	3804036027602;0	178346147675594;3	29469226328892;0	00953248898385338;0	0261157411459562;0	958732096291586
1767;11;127;447;"CTCTGGTTCAGCTCATACAACAGCTTCTTAGGTAAATCATATTAGCTGTATTGTATTGTG";"A_21_P0011292";"HERC2P7";"NR_036470";"ref|Homo sapiens hect domain and RLD 2 pseudogene 7 (HERC2P7)	non-coding RNA [NR_036470]";6	39605918333457;-0	107373767726017;-0	967939468867537;0	358798004566711;0	493740422790539;0	181256502704754
1768;11;128;406;"AAGACACTGAGTGCCATCTACAGCCAGCTGGGCAACGCCTACTTCTACCTGAAGGAGCAC";"A_33_P3293254";"GPSM1";"NM_015597";"ref|Homo sapiens G-protein signaling modulator 1 (GPSM1)	transcript variant 2	mRNA [NM_015597]";6	52213894368861;-0	715765042644921;-1	79050962513359;0	107574591594564;0	196936531887192;0	722971532752528
1769;11;129;1476;"AAAGGAGTCCATTATCGCTGGGCATTTTTCATGGCCAGTGGCCCATGTTTAGATGACATT";"A_23_P122775";"RTN4IP1";"NM_032730";"ref|Homo sapiens reticulon 4 interacting protein 1 (RTN4IP1)	nuclear gene encoding mitochondrial protein	mRNA [NM_032730]";10	4636244434964;-0	117810922716307;-2	15772957099519;0	059811098117999;0	122726591687637;0	450540238784793
1771;11;131;1133;"GGTTCTGGGGACAGAAGATTTATATGGCTATATTGACAAATACAACATTGAATTAGATCC";"A_24_P76666";"CSNK2A1";"NM_177559";"ref|Homo sapiens casein kinase 2	alpha 1 polypeptide (CSNK2A1)	transcript variant 1	mRNA [NM_177559]";8	31696411562482;-0	267253843404735;-3	44732522566143;0	0074993865585697;0	0212457310903049;0	779949693620288
1772;11;132;5319;"TAATAGGATGCTGCCTAACCCAGTTCATCTCTATGTCCTGTTCACTGAATATTCCGGGTA";"A_23_P59349";"HECA";"NM_016217";"ref|Homo sapiens headcase homolog (Drosophila) (HECA)	mRNA [NM_016217]";11	324052266941;0	161258533531969;2	60149203426934;0	029069810237546;0	0675963937744223;0	248152376541449
1773;11;133;6696;"TAATCCATCTCAGAAGTTGAAGATGTGATGTTGCTCGGCCTTTGGAATAATTTTTAAATC";"A_32_P144421";"ZNF518B";"NM_053042";"ref|Homo sapiens zinc finger protein 518B (ZNF518B)	mRNA [NM_053042]";9	2818970519049;-0	471220664854664;-5	64780844265781;0	000335316881466748;0	00150456505735618;0	552339220772801
1774;11;134;1535;"TTGGTCCAAGGCACTACACCTGTACTGCAGGGGCTCAATGGAGCTGTCTTCAGGCCAGAA";"A_23_P85783";"PHGDH";"NM_006623";"ref|Homo sapiens phosphoglycerate dehydrogenase (PHGDH)	mRNA [NM_006623]";6	75906555204876;1	73819441929288;7	85112563308479;2	84288556351771e-05;0	000194771252786885;7	1.50226e+07
1775;11;135;21;"AACTACTATGGCACCCCTGGCTATGGGTTCTGTGGCTATGGAGGCCTGGGCTATGGCTAT";"A_33_P3364520";"KRTAP6-1";"NM_181602";"ref|Homo sapiens keratin associated protein 6-1 (KRTAP6-1)	mRNA [NM_181602]";7	00881009591115;0	343449077152324;1	70072683480631;0	123802985770566;0	220085078007779;0	807951905410759
1776;11;136;3404;"AACAGAGACAGACAAATCAGAGATCAGTAGCCCTTGAAAAGTGTCCGGTGCAACAATGAG";"A_23_P377629";"FAM75C2";"NM_001166137";"ref|Homo sapiens family with sequence similarity 75	member C2 (FAM75C2)	mRNA [NM_001166137]";5	78891521474351;0	0550928971119138;0	203688614596405;0	843206501571605;0	896200331436551;0	32900311641679
1777;11;137;3155;"TTTCTTGGTTTTAAGGCATCTCGAATGCCCCTTGAAAATGTAGTTTTCCCTGGTGGTGGG";"A_33_P3225567";"TRMT2B";"NM_024917";"ref|Homo sapiens TRM2 tRNA methyltransferase 2 homolog B (S. cerevisiae) (TRMT2B)	transcript variant 1	mRNA [NM_024917]";10	264863425298;-0	581521053865337;-10	8808209154306;2	03532276311119e-06;2	29571281166905e-05;8	4.27766e+07
1779;11;139;2629;"TGTGTCTTTATCTCCCTCCAGAGAAGCAACGCGCTCCAGACTCTGATGCACTGGAGGCAG";"A_19_P00321230";"LOC202181";"NR_026921";"ref|Homo sapiens chromosome 5 open reading frame 25 pseudogene (LOC202181)	non-coding RNA [NR_026921]";9	23180331416934;-0	00132951976723206;-0	00815439735564914;0	993674781574968;0	995903029496776;0	365604864068898
1780;11;140;166;"AAGATTACTGAGACGACATGCGTGAAGCACCAATTACGGCGCCTGGACTCACGAGGCGGT";"A_21_P0006052";"XLOC_007559";"ENST00000369027";"linc|BROAD Institute lincRNA (XLOC_007559)	lincRNA [TCONS_00015749]";6	75382064185045;-0	0396582010518394;-0	238498436651401;0	816928898262833;0	878114493215944;0	322363644271035
1783;11;143;1906;"TTTTTTAATGTACCCTACCTTCAGTATTCTCTTTGTAAGTTGGTGACTTGCATCTGTGGC";"A_23_P111672";"TES";"NM_152829";"ref|Homo sapiens testis derived transcript (3 LIM domains) (TES)	transcript variant 2	mRNA [NM_152829]";8	37287602049082;-0	313206352164297;-4	62385376310968;0	00130647013470742;0	00477477715247004;0	175286318053493
1786;11;146;1162;"AGAACGGGAATGTTCCTGTGGAAAACCCCGAAGACCCTCAGCAGAATCAGGAGCAGCAGC";"A_33_P3318148";"SLC24A4";"NM_153647";"ref|Homo sapiens solute carrier family 24 (sodium/potassium/calcium exchanger)	member 4 (SLC24A4)	transcript variant 2	mRNA [NM_153647]";5	92293650667538;0	0696789116937433;0	787837565346889;0	451390107157346;0	582657008400993;0	21389857249744
1787;11;147;574;"GGACCTCAGCAGCGGTGTCCCAAGTTTCCTGACTTCTTCCATCCTCTGGAAATCAGCTGT";"A_33_P3328511";"ARL17B";"NM_001039083";"ref|Homo sapiens ADP-ribosylation factor-like 17B (ARL17B)	transcript variant 1	mRNA [NM_001039083]";9	11086369709494;-0	466259724099126;-6	19605317812577;0	00017181211063928;0	000854546170072957;0	313711503124946
1789;11;149;962;"CCTCTTCATCCATCTCTGCTCCGAGAGCACCACAGTCAAGCACAAGCTCCTGAAGGAGTG";"A_23_P418493";"ATPAF2";"NM_145691";"ref|Homo sapiens ATP synthase mitochondrial F1 complex assembly factor 2 (ATPAF2)	nuclear gene encoding mitochondrial protein	mRNA [NM_145691]";9	13075999623635;-0	0720611889729668;-0	909684920856133;0	38710896359944;0	522269262478198;0	191729693615038
1790;11;150;1312;"CTTAAAAGAACAACAGTCTTTTCTTCAGGACTCAAGTTGCTTTATAAAGTTGCTGGATAC";"A_23_P252740";"DSCC1";"NM_024094";"ref|Homo sapiens defective in sister chromatid cohesion 1 homolog (S. cerevisiae) (DSCC1)	mRNA [NM_024094]";9	40915425317469;0	181677926311632;3	40506842956322;0	00801226885410423;0	0225163576740087;0	826595526162049
1792;11;152;392;"TGATATCCTGTGTATGGCCACCACCTAACACTGCTCACTTCTACATGTAAACCTCAGGTA";"A_21_P0003851";"XLOC_003680";"ENST00000503950";"gb|DB020896 TESTI2 Homo sapiens cDNA clone TESTI2001259 5'	mRNA sequence [DB020896]";6	17277893761754;0	0281117086384857;0	186145038955149;0	856530608172102;0	905104750631408;0	33227200793828
1793;11;153;1005;"AGATGGAGAGAAAATTGTGGTCCAGGGAGAGCCTGGGGACGACTTTTACATCATCACGGA";"A_33_P3360675";"PRKAR1B";"NM_001164761";"ref|Homo sapiens protein kinase	cAMP-dependent	regulatory	type I	beta (PRKAR1B)	transcript variant 1	mRNA [NM_001164761]";8	21285273751988;1	01180783017014;13	3055041207553;3	77222921523841e-07;6	15569655914666e-06;2	2.59811e+07
1798;11;158;4033;"GGGAAGGGGCTCTGGGACCAGACCCCCCACACTACTGCGTCTTTGTTTCTATCAGTCTTT";"A_23_P217028";"USP20";"NM_001008563";"ref|Homo sapiens ubiquitin specific peptidase 20 (USP20)	transcript variant 2	mRNA [NM_001008563]";8	98802015038738;0	240769282998142;3	03544938215122;0	0144050196208768;0	0371496659240115;0	136379729331842
1799;11;159;837;"AGATCTTCTGCCTCCACGTCTTCATTTCTGCCGTGGAGGTGCCACAGGTAACTGGGAGCA";"A_19_P00320675";"LOC653712";"NR_034179";"ref|Homo sapiens intraflagellar transport 122 homolog (Chlamydomonas) pseudogene (LOC653712)	non-coding RNA [NR_034179]";5	73591474036278;-0	124585624799995;-0	974662217270815;0	355631569277034;0	490663003744424;0	180126754788829
1800;11;160;339;"AGTCAAGGCTCCAGGGTTTTGTGACAAAGAACCAGCTCAAAGATATGGCTGTTACTACTG";"A_32_P514599";"THC2537477";"THC2537477";"tc|HUMHSP60A chaperonin (HSP60) {Homo sapiens} (exp=-1; wgp=0; cg=0)	partial (46%) [THC2537477]";11	0035117691594;-0	30187936453231;-2	93329438600803;0	0169769897501672;0	0427781325002255;0	157042330976431
1803;11;163;785;"CTCCAGGAAAGCTGTGGATGGAGTTGTGGCCGTTTTCTACACTGTGCTGACGCCCCTTCT";"A_23_P125204";"OR10G8";"NM_001004464";"ref|Homo sapiens olfactory receptor	family 10	subfamily G	member 8 (OR10G8)	mRNA [NM_001004464]";5	84992904266402;-0	323848142929553;-2	48531891168894;0	0351229017056;0	0791218044722583;0	290463184790016
1805;12;1;7705;"AAATCAGGCATTTTTCCAAAGGAAGTGCTAATGGGCCTATTTGACTTCTGAGTGAAGCAA";"A_23_P211136";"BRWD1";"NM_018963";"ref|Homo sapiens bromodomain and WD repeat domain containing 1 (BRWD1)	transcript variant 1	mRNA [NM_018963]";7	80192261631282;-0	0380785529873267;-0	335410275492412;0	745134809218727;0	825732227716472;0	303133648487979
1807;12;3;1764;"TATCAATCACCTGATAGCAACAGGGACAGCTGCCAATACCCTGCTCTTTACTCAATGGTA";"A_33_P3285038";"CERS5";"NM_147190";"ref|Homo sapiens ceramide synthase 5 (CERS5)	mRNA [NM_147190]";11	3817568967361;0	0179114381162115;0	250488709650189;0	807931522292292;0	871756607137035;0	320029607716472
1808;12;4;0;"TAAAGGTGGTCAAGGTGGCCGGTTTGGCCATAAGGGTGTGGCTATTAACATGGTGACAGA";"A_33_P3243343";"A_33_P3243343";"A_33_P3243343";"Unknown";14	2238868125568;0	0214135757781104;0	401083485231049;0	697876332536828;0	789669911903391;0	289894851456191
1809;12;5;234;"ATGACCATGACCCTCCACACCAAAGCATCTGGGATGGCCCTACTGCATCAGATCCAAGGG";"A_24_P383478";"ESR1";"NM_000125";"ref|Homo sapiens estrogen receptor 1 (ESR1)	transcript variant 1	mRNA [NM_000125]";6	87626857789684;0	122693239285307;0	669742953861534;0	520122781431829;0	644222743792628;0	23649990179607
1813;12;9;608;"AAGATGATGATGATGATTCAGACTCTGATGGTGATGGCAAAGATCTTGTGCCTCAAGCAG";"A_23_P111635";"STYXL1";"NM_016086";"ref|Homo sapiens serine/threonine/tyrosine interacting-like 1 (STYXL1)	mRNA [NM_016086]";9	31343619511224;-0	143028044730707;-1	61420811771035;0	141535591317829;0	244543104891691;0	897739498473957
1815;12;11;0;"TTGTTGGACGAGCTTGCTTTAGTTAGACGTCTCATTATTGAAGTTACTATTATTGTTGGA";"A_24_P246636";"A_24_P246636";"A_24_P246636";"Unknown";6	28560161023111;0	0519306772085475;0	408288382473686;0	692770171352436;0	785834682721329;0	288486904696063
1819;12;15;926;"AACGAGCATCTCATGAAACTCTGTTCTGTACGAAGCCCTTGCATCAAGTGTTTGCCTCAT";"A_23_P50990";"CENPO";"NM_024322";"ref|Homo sapiens centromere protein O (CENPO)	transcript variant 1	mRNA [NM_024322]";8	71710625307519;-0	104275725196429;-1	38828926679343;0	199019695879641;0	318661250542684;0	116983380648568
1823;12;19;3397;"TCTTGCTAACCATGTTTGAGGCCCTGGGAGACCCCGAAAAGAACTGCTCCCGAGCAGCTA";"A_33_P3404189";"HEATR7A";"NM_032450";"ref|Homo sapiens HEAT repeat containing 7A (HEATR7A)	transcript variant 1	mRNA [NM_032450]";6	9972101482528;0	103926935037781;0	815306154097606;0	43630294116628;0	569398517589865;0	209031262541358
1824;12;20;505;"AGTGGAGGCTAAACAAAATCATCTTCCCTCCCACCGTGGCTCTTGTTCAATAAAACCAAC";"A_21_P0010303";"XLOC_014122";"TCONS_00029182";"linc|BROAD Institute lincRNA (XLOC_014122)	lincRNA [TCONS_00029182]";9	76306982543806;0	358279125770101;2	50342164541695;0	0341025091466285;0	0771743139478554;0	283313773779493
1825;12;21;617;"AAGCGCAGGCACAGGAAGCTGGTGACGGCGATGAACGGTACATTCTGGAGGGGTGCGGAA";"A_33_P3363316";"FLJ35390";"NR_015401";"ref|Homo sapiens uncharacterized LOC255031 (FLJ35390)	transcript variant 2	non-coding RNA [NR_015401]";7	29700477629628;0	507695377877273;4	96381345500938;0	000818035970297217;0	00319717867255275;0	117371274045955
1826;12;22;3297;"GTGATCCTTTAAAGAAACCTAAACATTTCATAGACTTTTGCACAATGGCAGAATGCAGTT";"A_33_P3390013";"ADAMTS1";"NM_006988";"ref|Homo sapiens ADAM metallopeptidase with thrombospondin type 1 motif	1 (ADAMTS1)	mRNA [NM_006988]";6	48896255425789;3	11248796485544;32	2443779058381;1	76639985076767e-10;2	40859098295354e-08;8	84215.2
1827;12;23;184;"TGGTTTACTATCGGGACCTTCCGCATCCTGCTGATGTTTTGTTGCTTAGGATATGAATGG";"A_21_P0011656";"XLOC_l2_006404";"ENST00000534258";"Unknown";9	61196554843164;0	228529114088154;3	13038377245325;0	0123747838316368;0	0325956080627055;0	119661377684835
1829;12;25;2292;"CCGGAAGAGCAGCTGCCCTCCGACCCCTCACTTTGTGCCTTTAGTAAACACTGTGCTTTG";"A_33_P3344618";"TFEB";"NM_007162";"ref|Homo sapiens transcription factor EB (TFEB)	transcript variant 1	mRNA [NM_007162]";11	3079456566209;-0	417613963239221;-3	25593741934711;0	0101352001683558;0	0274907907466023;0	100921139070504
1831;12;27;0;"ACACACATATACATACATATACACACATATACATACACGTACACACACAGACATATATAA";"A_33_P3307402";"A_33_P3307402";"A_33_P3307402";"Unknown";6	08372496749612;0	314623628374717;0	85175969366988;0	416814951129949;0	551026605419811;0	202286770103161
1836;12;32;2491;"GAGGAGGAGGATTGGCCCGGCTGCTGAAAACATACGTGTAATTGAAGGAATTCTATTAAG";"A_33_P3445679";"FLJ42392";"NR_033877";"ref|Homo sapiens uncharacterized LOC400123 (FLJ42392)	non-coding RNA [NR_033877]";6	88045162281598;-0	0704067302830156;-0	777481608170421;0	457167418822023;0	588160058277404;0	215918791075393
1837;12;33;1648;"TTGACCATATTTAACACAGAGTTTCCCAAAGTTTTGGATTAGAAAGCTCGGCCGGGCTCG";"A_33_P3311083";"PHLDB3";"AK097512";"gb|Homo sapiens cDNA FLJ40193 fis	clone TESTI2019430. [AK097512]";7	12402233176114;-0	225692188898247;-1	34273431757216;0	212801858998567;0	335635142997298;0	123214647609092
1838;12;34;319;"TGAGGTGAAGCAATGATGCAAGGCTTTTGGCAACCGTTCCCCAGCTCCCAGCCACACATC";"A_19_P00322592";"XLOC_012826";"AK309717";"linc|BROAD Institute lincRNA (XLOC_012826)	lincRNA [TCONS_00026204]";7	32563856561438;0	217923814384554;2	04952052818253;0	0712181829988053;0	141757971726452;0	520406128395054
1839;12;35;892;"AAGAGAAACTGACTGGGCAACATGTTATTCAGGAAGTGAGCTCACAATGACTCAAGCTGC";"A_21_P0010674";"XLOC_l2_001332";"TCONS_l2_00001808";"linc|BROAD Institute lincRNA (XLOC_l2_001332)	lincRNA [TCONS_l2_00001808]";6	92549006420757;0	195427750263296;1	63838709779039;0	136361097576137;0	237477006169503;0	871799221295282
1840;12;36;3297;"AGTGAGAAGGTTGTCAGCATTTCCAGTGAGCACCTGGAGCCTATCACCCCCACCAAGAAC";"A_23_P27840";"SUPT5H";"NM_003169";"ref|Homo sapiens suppressor of Ty 5 homolog (S. cerevisiae) (SUPT5H)	transcript variant 1	mRNA [NM_003169]";11	0552530696917;0	0602244210778853;0	982195607305623;0	352108013952883;0	48730586138843;0	178894317956758
1842;12;38;6500;"TTACAGTTCATAAGTGAAACAGACTAATTCAATGGCAATACCTTTTGTATAGGTCCTGTG";"A_23_P216622";"FKTN";"NM_001079802";"ref|Homo sapiens fukutin (FKTN)	transcript variant 1	mRNA [NM_001079802]";7	35461657625442;-0	290679142827611;-2	73433382430625;0	0234241817260834;0	0562992133800405;0	206679422045701
1843;12;39;538;"ATCAGTTTCCTCTAATGCCAAGTGGAGACAATAAATTGCCCTTTCCAGGGTCCCAACAAG";"A_21_P0012058";"XLOC_l2_007928";"ENST00000449391";"tc|Q420P7_DESHA (Q420P7) DoxD-like protein	partial (14%) [THC2637283]";6	53961029268373;0	0717182631897444;1	14906681833082;0	280655272373127;0	412128413105137;0	151296007733173
1845;12;41;5806;"AGTGAGTGTCCTGCAGCCCTTATTCCCTCCATAGAAAGCATCCTCAGAGCACCTTCCCTG";"A_23_P76969";"SIPA1L1";"NM_015556";"ref|Homo sapiens signal-induced proliferation-associated 1 like 1 (SIPA1L1)	mRNA [NM_015556]";11	6184064840377;0	935447132889756;12	5115466914921;6	33974561770246e-07;9	27753587892975e-06;3	4.05866e+07
1846;12;42;894;"GAGGTGAAAGGGGCATTAAAGAAAGTTCTAGCAAAGGCTCTGGGAGTAAATATTTTATGA";"A_33_P3365077";"OR2G2";"NM_001001915";"ref|Homo sapiens olfactory receptor	family 2	subfamily G	member 2 (OR2G2)	mRNA [NM_001001915]";5	73918722314173;-0	0691341355349238;-0	574676678162792;0	579832450449807;0	695278369641788;0	25524287635853
1848;12;44;2457;"TTACTTTTGTTGTCCTGCCTCTTCAGGTAATGGTCACAGATTTGGCTGTAGGCACGTTAC";"A_33_P3391429";"ZNF672";"NM_024836";"ref|Homo sapiens zinc finger protein 672 (ZNF672)	mRNA [NM_024836]";9	46983660333598;-0	0554214382178611;-0	65783498797359;0	527393815538637;0	650798872000665;0	238914056978241
1850;12;46;1435;"GAGCTGCAACTTCTTACTTCCCTAATGAAGTTAAGAACCTGAATATAAATTTGTGTTCTC";"A_33_P3330109";"HLA-C";"NM_001243042";"ref|Homo sapiens major histocompatibility complex	class I	C (HLA-C)	transcript variant 2	mRNA [NM_001243042]";15	3458537508168;0	0296510278093542;0	532723323346132;0	607348683723407;0	717801856188685;0	263511448692823
1851;12;47;387;"ACTGGCCTACCGCAAAGACCCAGCCCAGAGGAACAAGGTGCCACTGTATGTCTGAAAAGG";"A_21_P0010313";"XLOC_013949";"TCONS_00029224";"linc|BROAD Institute lincRNA (XLOC_013949)	lincRNA [TCONS_00029224]";8	76303678637462;0	28192152403957;1	95340383329165;0	083082490181099;0	160393216991287;0	588817772000388
1853;12;49;1646;"TACTTCACCGATGTCAGCATTTTACCCAGAGCCATTCCAAGGTGACCATAACTCACTTAA";"A_19_P00807643";"CYP1B1-AS1";"NR_027252";"ref|Homo sapiens CYP1B1 antisense RNA 1 (non-protein coding) (CYP1B1-AS1)	non-coding RNA [NR_027252]";6	42122835214158;-0	0412381731380558;-0	433386200349205;0	675112549627838;0	771790182494008;0	283331043689074
1854;12;50;1517;"ACCCCACTCTGAGTTCACTAAGTTATGCAACTTTCGTTTTGGCAGATATTTTTTGACACT";"A_24_P379233";"GJB3";"NM_024009";"ref|Homo sapiens gap junction protein	beta 3	31kDa (GJB3)	transcript variant 1	mRNA [NM_024009]";6	68303957285349;-1	78954550603241;-13	6229161623625;3	08941070660603e-07;5	27412395430143e-06;1	9.36178e+07
1855;12;51;833;"AGTGGATCCTGAGCCTAGAAGAACACAAATGGCCAAATATTTCCCTTCCGTCTTCCTTCT";"A_33_P3356816";"LCE1B";"NM_178349";"ref|Homo sapiens late cornified envelope 1B (LCE1B)	mRNA [NM_178349]";6	75078596326125;0	186937460921571;2	31083645512593;0	0466582240723003;0	100291339967044;0	36817843334071
1856;12;52;495;"AAAGAAGAAGAGCAGGAAAGACACCTCGAGGAACTGCTCGGCCTCCACATCCCAAGGTCG";"A_33_P3355055";"ARL6IP4";"NM_001002251";"ref|Homo sapiens ADP-ribosylation-like factor 6 interacting protein 4 (ARL6IP4)	transcript variant 3	mRNA [NM_001002251]";11	2271111978672;0	338919011843224;3	2322122943323;0	0105236234699007;0	0283840586087842;0	104200404879095
1857;12;53;1475;"CAAAAATAAGGCTCCAGTGCCTCCACTCAGGAAAGCTCAAGTAGGTTTTCTTGAGAATTT";"A_21_P0005143";"XLOC_005531";"AK093114";"tc|Q28XZ4_DROPS (Q28XZ4) GA12204-PA (Fragment)	partial (6%) [THC2627193]";6	379339165697;-0	168715426681883;-0	789426005995928;0	45050827315276;0	581778273645235;0	21357598114927
1858;12;54;218;"AAGATCAGAAGCCAGTCATGGATGACCAGCGCGACCTTATCTCCAACAATGAGCAACTGC";"A_23_P70095";"CD74";"NM_001025158";"ref|Homo sapiens CD74 molecule	major histocompatibility complex	class II invariant chain (CD74)	transcript variant 3	mRNA [NM_001025158]";8	62568439699218;0	595121203976101;4	3974451743782;0	00180123044281648;0	00626430299900945;0	229968137319202
1859;12;55;737;"TTGGCTACTGGGAATAACGCTTCAATGAACATGGCAGTGCAGATATATCTGAGATACTGA";"A_33_P3317336";"ENST00000381778";"ENST00000381778";"ens|cDNA FLJ26336 fis	clone HRT02842 [Source:UniProtKB/TrEMBL;Acc:Q6ZP83] [ENST00000381778]";6	2738930011122;0	609148750354785;1	88117820766949;0	0932113565670138;0	175545236397642;0	644442183527972
1860;12;56;807;"TGGCTATTTTGATTAGGGAAGAGGGATGTGGTCTCTGATCTCTGTTGTCTTCTTGGGTCT";"A_23_P114952";"TMEM9";"NM_016456";"ref|Homo sapiens transmembrane protein 9 (TMEM9)	mRNA [NM_016456]";10	9663643038853;-0	932181076297459;-14	2771787396028;2	07408919128374e-07;3	9423620895163e-06;1	4.47276e+07
1864;12;60;3343;"TTTTTTAAGCATCCTGACAGGAAATGTTTTCTTCTACATGGAAAGATAGACAGCAGCCAA";"A_23_P377291";"TGFA";"NM_003236";"ref|Homo sapiens transforming growth factor	alpha (TGFA)	transcript variant 1	mRNA [NM_003236]";6	66610274956897;0	830476072049259;7	64495215588007;3	49967712842953e-05;0	000230967206712187;8	4.79012e+08
1865;12;61;3825;"TGTCAGTGAACTGATATCTGATGTTTATGATATGGTGTCTTTTTCTTGAAACAAGCTTCC";"A_23_P109442";"HPS4";"NM_022081";"ref|Homo sapiens Hermansky-Pudlak syndrome 4 (HPS4)	transcript variant 1	mRNA [NM_022081]";10	6068795605447;-0	268932946969565;-4	64002920927031;0	00127720164695959;0	00468273316613415;0	171907301410708
1866;12;62;329;"ATTGGTCCGAGGCCCTGAACCTAATAAATGCCAGTGAAATGGGATTTGACTGTAGATCTG";"A_33_P3252915";"RNF7";"NR_037702";"ref|Homo sapiens ring finger protein 7 (RNF7)	transcript variant 5	non-coding RNA [NR_037702]";7	57908314540566;0	508125064031184;1	33298058432421;0	215856028158877;0	33915565578598;0	124507059180738
1868;12;64;566;"CTCCTGGAGTCAACGTATCCACAGAAAGCCAAGCAGCTAATGTCAGATGAGAAATGCTTT";"A_21_P0011340";"LOC100506874";"NR_038273";"ref|Homo sapiens uncharacterized LOC100506874 (LOC100506874)	transcript variant 1	non-coding RNA [NR_038273]";6	96503153031263;-0	399160731882713;-2	54161347514742;0	0320461263393758;0	0732990507926018;0	269087337900253
1869;12;65;1024;"TCTTCAACTATAGTACAGATTAGTTCTGAGTGATGGTATCAAAAGGTGAGAAAGACGTCA";"A_24_P387609";"ISCA1";"NM_030940";"ref|Homo sapiens iron-sulfur cluster assembly 1 homolog (S. cerevisiae) (ISCA1)	mRNA [NM_030940]";7	85273103926923;-0	249655505084179;-2	00966142515463;0	0759269497010274;0	149293000206468;0	548067888441949
1870;12;66;1771;"ATTCAGAACCTTCTAATGAAAACTCCATGCCTCTGGTCCTTGGACTCTTGTCCATGGTTC";"A_33_P3265855";"PRR5-ARHGAP8";"NM_181334";"ref|Homo sapiens PRR5-ARHGAP8 readthrough (PRR5-ARHGAP8)	mRNA [NM_181334]";6	76584184650936;-0	0697753313708409;-0	621597727679119;0	549891596896002;0	67051311386887;0	246151330593212
1871;12;67;3781;"CTTCTTTCTGCCTTAAGAATGTCCTTTTAGGCTGGGCATGGTGGCTCACGCCTGTAACCC";"A_23_P164022";"MYO1C";"NM_033375";"ref|Homo sapiens myosin IC (MYO1C)	transcript variant 3	mRNA [NM_033375]";16	4406227161869;-0	0205005926354467;-0	36666703564108;0	72248638590274;0	808914635191364;0	296959760622395
1874;12;70;4951;"CCTTTCCCATGTACTCAGTTTAGCTCTCAAAGAAGGGGTGAATCATAAAGCCAGTGAAAA";"A_23_P110606";"MAML1";"NM_014757";"ref|Homo sapiens mastermind-like 1 (Drosophila) (MAML1)	mRNA [NM_014757]";8	45227856727282;0	0157225983434941;0	147500996921166;0	886044517309748;0	925804031658799;0	339870898193858
1875;12;71;2225;"CCTCCTGTTGCTTTCCTAACCCTGCCCTCCGGGGCGTTAATAAAGTCTTAGCAAGCGTCC";"A_33_P3249872";"FBLN1";"NM_001996";"ref|Homo sapiens fibulin 1 (FBLN1)	transcript variant C	mRNA [NM_001996]";8	57679464394077;-0	50940472922295;-7	3280459345373;4	85805677690145e-05;0	000301508711823893;0	110686531054799
1876;12;72;1961;"CTGTATTTAAATGCCCATGTAGTGCCTGGGCCTCCACAGAGCTCTAGGCCCCGTCCATGA";"A_33_P3304883";"LOC100131372";"XR_108721";"ref|PREDICTED: Homo sapiens hypothetical LOC100131372 (LOC100131372)	miscRNA [XR_108721]";6	82163993789791;-0	472123792707692;-1	12294986854516;0	291017667953105;0	42377250349477;0	155570656928947
1878;12;74;3089;"CCCTGTTTTTAGCCGGAAAGGATTCAGGATAAACATTATTATGCATTCTGAATTGGATGC";"A_23_P3042";"PPP2R5E";"NM_006246";"ref|Homo sapiens protein phosphatase 2	regulatory subunit B'	epsilon isoform (PPP2R5E)	mRNA [NM_006246]";12	0244305933024;0	0943012252811233;1	75125935463077;0	114410799412847;0	206699950881732;0	758813912669276
1880;12;76;478;"TCATGCTTGCGATTCTTCTGGGGTCCTTTCTTATCTCTTTAATTATTAGTGTTCCAAAGA";"A_23_P336506";"TAS2R9";"NM_023917";"ref|Homo sapiens taste receptor	type 2	member 9 (TAS2R9)	mRNA [NM_023917]";6	97491064500553;0	0460805091062513;0	468034188135984;0	651079656866246;0	75222573359982;0	276148760407782
1881;12;77;803;"TCTCTCTTGAGAACTTGGCTCAGGGCTCCTGAGGACCTTTCCCAGCATTACCTTCCCTTC";"A_24_P331904";"COMMD4";"NM_017828";"ref|Homo sapiens COMM domain containing 4 (COMMD4)	mRNA [NM_017828]";14	0025458812874;-0	180615213021657;-3	95311594398644;0	00345628746703013;0	0109969676378317;0	403708467523297
1884;12;80;634;"GCTATTATGGAATTAACAATGTAACCATCTGAAAGCAACTTTTTTGGTGTCTCAGATGAG";"A_23_P59888";"NACAP1";"NR_002182";"ref|Homo sapiens nascent-polypeptide-associated complex alpha polypeptide pseudogene 1 (NACAP1)	non-coding RNA [NR_002182]";9	75071057329714;-0	23242084099299;-2	18058784836869;0	0576390272665571;0	119233206291808;0	4377157101414
1885;12;81;268;"ATGAAAGACGCATCCACCCAGGAAGGCCCACTGGCATCGCAATCTCAGGGAAGATTCCCA";"A_19_P00804359";"XLOC_009194";"GU369676";"linc|BROAD Institute lincRNA (XLOC_009194)	lincRNA [TCONS_00019370]";7	32761102300052;-0	343357380492019;-0	98970771937698;0	348620369000073;0	483602184430655;0	17753466518877
1886;12;82;7341;"ATTCTATGTCTGTAAAAACCAACAAAGGCATTGGACTTGTGTGAATGTACAGGGTTTTTT";"A_33_P3316539";"SLC7A2";"NM_001008539";"ref|Homo sapiens solute carrier family 7 (cationic amino acid transporter	y+ system)	member 2 (SLC7A2)	transcript variant 2	mRNA [NM_001008539]";9	58367519166611;-0	674109777723084;-7	17860191664396;5	69162441946971e-05;0	000342156685631488;0	125608763941379
1887;12;83;2307;"CATTGAGGACTTCTTCCTAGAGCATGAAGCTCTTGGTATTTCCATGGCCAAGGTACTGAT";"A_23_P110062";"EIF2B5";"NM_003907";"ref|Homo sapiens eukaryotic translation initiation factor 2B	subunit 5 epsilon	82kDa (EIF2B5)	mRNA [NM_003907]";10	3098929006751;0	207808562260306;2	10699784735244;0	0649197838566964;0	131391109717515;0	482348455475697
1888;12;84;2042;"CCATCAGATTCGCCTTGGGTGTAGATGAAACAGAAATAAAAGAATCAAAGACGACTCAAG";"A_33_P3408320";"CERS1";"NM_198207";"ref|Homo sapiens ceramide synthase 1 (CERS1)	transcript variant 2	mRNA [NM_198207]";9	16911444402147;0	762801408447052;15	1094949653905;1	27935698053546e-07;2	72339843280326e-06;9	9.97838e+06
1889;12;85;0;"TACGTTCTACGCATCAGGAAACCAAGGCACACAGACATCACCTTGGGCCACACGGCTGGT";"A_33_P3209135";"A_33_P3209135";"A_33_P3209135";"Unknown";6	31377297652182;-0	200662928102076;-1	44432617764175;0	183124765673645;0	29869506611475;0	109653616678036
1891;12;87;3536;"CAAAGATTTGTGGTAACTGAAGGTGTTGGGTCAGTGGCCAGGTGCCGACACTGAGCTGTG";"A_32_P153071";"VIPR2";"NM_003382";"ref|Homo sapiens vasoactive intestinal peptide receptor 2 (VIPR2)	mRNA [NM_003382]";6	0939919992937;-0	25096019085424;-0	978650333203205;0	353762978216265;0	488998382112157;0	179515657375159
1892;12;88;692;"TGCGTAAGTGTTGTGCTCAGTATCCCAAGGGAAGATCTGTCGTCTGTTCAGGATTTGAAA";"A_23_P11295";"MTCP1NB";"NM_001018024";"ref|Homo sapiens mature T-cell proliferation 1 neighbor (MTCP1NB)	nuclear gene encoding mitochondrial protein	mRNA [NM_001018024]";10	8799595984112;0	537911167377963;10	6838779493203;2	36745297233e-06;2	5886726690309e-05;9	5.03248e+07
1893;12;89;1163;"TGGACATTCGAACAGAGTTCAAGAAGCATTATGGCTATTCCCTATATTCAGCAATTAAAT";"A_23_P121716";"ANXA3";"NM_005139";"ref|Homo sapiens annexin A3 (ANXA3)	mRNA [NM_005139]";13	9065679212334;-0	481679669225294;-10	3444488975577;3	08982719681727e-06;3	20743997398645e-05;1	1.7748e+08
1894;12;90;2513;"CTTTGAATAGTGTGTCTAAACAAAAATAGGTGTCCAAGTAGTCACACTGAGACTTTAACT";"A_24_P83586";"MMACHC";"NM_015506";"ref|Homo sapiens methylmalonic aciduria (cobalamin deficiency) cblC type	with homocystinuria (MMACHC)	mRNA [NM_015506]";9	42054601358276;-0	149794011875676;-2	25044644001229;0	0514673547053484;0	108747174945378;0	399220555979948
1895;12;91;601;"TGATGCTGAAATGTTTCCTTCCTCTACATATTCCATGATGCGTCCTGTGGGGTTATGCAA";"A_33_P3299165";"LOC440131";"NR_033889";"ref|Homo sapiens uncharacterized LOC440131 (LOC440131)	non-coding RNA [NR_033889]";6	74344220310905;-0	122803190583435;-0	816179707196943;0	435828802583862;0	569056677235603;0	208905769905478
1896;12;92;2522;"GTTGGTTCTTAGTATTATTTATGGTAAATAGGCTCTTACCACTTGCAAATAACTGGCCAC";"A_23_P146512";"GOLM1";"NM_016548";"ref|Homo sapiens golgi membrane protein 1 (GOLM1)	transcript variant 1	mRNA [NM_016548]";11	9097046098681;-0	442363890609276;-6	92053353232393;7	52515962637879e-05;0	000431965103062557;0	158578233131286
1898;12;94;192;"CAGGGAGATCAGGTCTATACGCTGGAGAAATTTGACTCGATGGGACAACAGACCTGCTTA";"A_24_P927474";"XM_002343200";"XM_002343200";"gb|PREDICTED: Homo sapiens similar to nucleolar protein family A	member 3 (LOC100289143)	mRNA [XM_002343200]";11	2030126955433;-0	204339263629473;-1	62099241886603;0	140066068488927;0	242537994187132;0	890378558654809
1900;12;96;546;"TGGTGCTAATGATCACCCTAATCACCGGCCCCACCAGGATGTCTACCCACGACTCTGATT";"A_21_P0013818";"XLOC_l2_015752";"TCONS_l2_00030522";"linc|BROAD Institute lincRNA (XLOC_l2_015752)	lincRNA [TCONS_l2_00030522]";7	00267918117644;0	0958624353788275;0	311660675903689;0	762520185688895;0	838730502306147;0	307905430753658
1902;12;98;6305;"ATTATTATTATTTGCAGTCATGGAGAACCACCTACCCCTGACTTCTGTTTAGTCTCCTTT";"A_23_P397376";"MAF";"NM_001031804";"ref|Homo sapiens v-maf musculoaponeurotic fibrosarcoma oncogene homolog (avian) (MAF)	transcript variant 2	mRNA [NM_001031804]";7	29654966278227;-0	0408853179578017;-0	305953554773902;0	76671951447902;0	841681555604853;0	308988788679257
1903;12;99;872;"CAGTCACAGCCTTGGCTGGGAAGGAGGGACGACAGCTGAAGGTCGACTAAAACAAAGTCT";"A_33_P3312877";"CCDC107";"NM_174923";"ref|Homo sapiens coiled-coil domain containing 107 (CCDC107)	transcript variant A	mRNA [NM_174923]";12	6939550650312;1	57589429017495;1	55247310952398;0	155558901727929;0	262983212902798;0	965434775856768
1904;12;100;1152;"AAGTTAGGGTAGAAAACAAAAAGGGAGTGGATTCTGGGAGCCTCTTCCCTTTCTCACTCA";"A_33_P3259253";"CD28";"NM_006139";"ref|Homo sapiens CD28 molecule (CD28)	transcript variant 1	mRNA [NM_006139]";6	41210413384218;-0	201167257593762;-1	43773737493859;0	184934677976183;0	30108000689706;0	110529149661371
1905;12;101;3088;"AGCTTCCTACTCTGCCCCTTGCCCAGTGGGTAGACAGCATCATGACTGTCACCAGTACCA";"A_33_P3286973";"TAS1R3";"ENST00000339381";"ens|taste receptor	type 1	member 3 [Source:HGNC Symbol;Acc:15661] [ENST00000339381]";10	1735972439181;0	682136072165816;1	09469489808424;0	302566653241311;0	435797820307286;0	159985257736866
1907;12;103;981;"CCAACCAGAAGATTGTCCTCAACTTCAACCCTCACTTTGAAATCGAGAAGCACGACTGCA";"A_33_P3297415";"NRP2";"NM_201264";"ref|Homo sapiens neuropilin 2 (NRP2)	transcript variant 6	mRNA [NM_201264]";6	66202446395965;-0	479332081181372;-6	3498728974436;0	000143419460430841;0	000735144669745852;0	269878149872901
1908;12;104;4322;"AGTAACACTTTAAACTGCTTCTATACGCGATTCAAGTCTAAAAGGAGGAAGACACTCTGA";"A_33_P3243524";"RAPGEF6";"NM_001164389";"ref|Homo sapiens Rap guanine nucleotide exchange factor (GEF) 6 (RAPGEF6)	transcript variant 5	mRNA [NM_001164389]";5	95701155595887;0	844375756872859;8	71144692649279;1	24745496651192e-05;9	96601311379182e-05;3	6.58612e+08
1909;12;105;2097;"TAATCCCAGCTACTTGAGAGATGACGAGGGAAGATCACTTGAGCCCAGGAGTTAAGAGGC";"A_33_P3220437";"TNFAIP8L1";"NM_001167942";"ref|Homo sapiens tumor necrosis factor	alpha-induced protein 8-like 1 (TNFAIP8L1)	transcript variant 1	mRNA [NM_001167942]";13	317370205526;0	0605490160657283;0	663641168147836;0	523840935251789;0	647507155888552;0	237705638702487
1911;12;107;1823;"CAGGACTCTTGGAACAGCCTGGTCTTGGCCGACAGTCACGGGGACATAATCACTGCGTAA";"A_33_P3293456";"GATA4";"NM_002052";"ref|Homo sapiens GATA binding protein 4 (GATA4)	mRNA [NM_002052]";5	87996660435436;0	0585867079398499;0	747962712832785;0	473901724399089;0	603918798161044;0	221703964714203
1912;12;108;677;"GCTGCTCCACCACGTGGTGCCTGCCCATCATGGCATCCACCACCAGGTGGCCTTTTTCTT";"A_33_P3416171";"THC2652132";"THC2652132";"tc|Q4RMH3_TETNG (Q4RMH3) Chromosome 10 SCAF15019	whole genome shotgun sequence	complete [THC2652132]";6	00354788097776;-0	0220298233670402;-0	150901970942793;0	883438853744548;0	923921427153057;0	339179777327637
1914;12;110;283;"TTTGTCTTTTGAAAGAGCATCTCTCAACCTAGTGTGTCTGGAATTGGTGGGTTCTTGGTC";"A_21_P0004289";"XLOC_004536";"TCONS_00010078";"linc|BROAD Institute lincRNA (XLOC_004536)	lincRNA [TCONS_00010078]";6	63754658903369;-0	109246098369112;-0	801518363408985;0	443832820880119;0	576234171545317;0	211540691934768
1916;12;112;1363;"ATGAGATCTTGGACTCTGCCTCTCACGACTGCCCCTTAGTCACTCAGACATACGGCGCAG";"A_33_P3356607";"WIPI2";"NM_001033518";"ref|Homo sapiens WD repeat domain	phosphoinositide interacting 2 (WIPI2)	transcript variant 3	mRNA [NM_001033518]";12	4397113008101;0	110268502562402;1	36686535450452;0	205403151543628;0	32649411788955;0	119858895951566
1917;12;113;776;"TTTTGTAGATTTTCTCGTCTATGATGTCCTTGACCTCCACCGTATATTTGAGCCCAACTG";"A_23_P217917";"GSTM4";"NM_147148";"ref|Homo sapiens glutathione S-transferase mu 4 (GSTM4)	transcript variant 2	mRNA [NM_147148]";9	01909921967204;-0	346114683898026;-3	59675924129184;0	00594513095141926;0	0174031282050736;0	638884322402812
1920;12;116;10928;"TATGCAATTTTGAGTGGCCTTTCAACCCTAAGATGAATGGTTTTGTTTTACTGGTTGTTG";"A_23_P201790";"PPP1R12B";"NM_002481";"ref|Homo sapiens protein phosphatase 1	regulatory subunit 12B (PPP1R12B)	transcript variant 1	mRNA [NM_002481]";10	1679862731958;0	152102619197239;2	44176609252659;0	0377046095617298;0	0839891145464375;0	308331513184907
1922;12;118;788;"ACTTAGGTTCCCTGCAGTGCCCAAGGTCAATGGAACCTTCCAGGCCAACTTTCCTCTGGG";"A_33_P3258478";"KIR3DL1";"XM_003403406";"ref|PREDICTED: Homo sapiens killer cell immunoglobulin-like receptor	three domains	long cytoplasmic tail	1 (KIR3DL1)	mRNA [XM_003403406]";6	29425956677466;0	0280597931238571;0	162861977951692;0	874287671573416;0	917885639313225;0	336963985902798
1923;12;119;1220;"AGGCGAGGCTGGTAAAACAATAGGGTTTGAGACAATTCTGTGGCATTAGAAATGAAAGAG";"A_23_P360542";"LINC00470";"NR_023925";"ref|Homo sapiens long intergenic non-protein coding RNA 470 (LINC00470)	transcript variant 1	non-coding RNA [NR_023925]";7	34206341116703;-2	83456786975166;-6	40599284220224;0	000134371526414616;0	000695972271048177;0	255497613739426
1926;12;122;1207;"ACTTCTCTTTCTGCAAAGGCATCTGAATGTGTCTGTGTCCCTATAGGCATAATGTGAGGT";"A_24_P418044";"HLA-J";"NR_024240";"ref|Homo sapiens major histocompatibility complex	class I	J (pseudogene) (HLA-J)	non-coding RNA [NR_024240]";14	9333820169853;-0	0476250010845103;-0	653806068862477;0	529867649209822;0	653175290234517;0	239786461258201
1927;12;123;154;"ACTCTCAATTTTCCAGTGGCTCTGACAGAAGGATAAATCTTCGGCTGTTTTAACTAAAAT";"A_19_P00321194";"KC6";"NR_002838";"ref|Homo sapiens keratoconus gene 6 (KC6)	non-coding RNA [NR_002838]";6	10221402029558;1	27655718364545;11	3463256333147;1	43717251438577e-06;1	74389937831576e-05;6	4.0201e+07
1928;12;124;3156;"TTAACTTGTAGATTCAGTGGTTCAATACCTGTTTAGTTGCTTGCTAATATTTCCAGAAGG";"A_24_P192627";"MLLT3";"NM_004529";"ref|Homo sapiens myeloid/lymphoid or mixed-lineage leukemia (trithorax homolog	Drosophila); translocated to	3 (MLLT3)	mRNA [NM_004529]";7	31670458683813;0	261229333088263;2	25567931753928;0	0510320425497428;0	107976272552484;0	396390504697675
1929;12;125;2451;"CCTTGCATAGACATAAAAGGACTCACTGGAGAGATACTCTATAAATGTGGAAAAGCATTC";"A_23_P101476";"ZNF442";"NM_030824";"ref|Homo sapiens zinc finger protein 442 (ZNF442)	mRNA [NM_030824]";7	68702487642062;0	133171795685184;1	96957079082607;0	080962891772013;0	157092906676116;0	576702039158676
1931;12;127;4059;"GGACAGTTGTCTTTGATTAAAGCCCCACCAAAACCCATTTAAGTATTTAATGTACATACT";"A_33_P3215093";"CHIC1";"NM_001039840";"ref|Homo sapiens cysteine-rich hydrophobic domain 1 (CHIC1)	mRNA [NM_001039840]";6	72290238023227;-0	0842493564141851;-1	19475193110456;0	263240307754697;0	393107480790114;0	144313254224519
1933;12;129;1729;"AGTCACTGCAGTTTCTACTTTTAATGGAATTTACTCAGCCACTGTTGCTTGGTACCCTGG";"A_23_P205074";"SLC46A3";"NM_181785";"ref|Homo sapiens solute carrier family 46	member 3 (SLC46A3)	transcript variant 1	mRNA [NM_181785]";6	79237136858425;0	23998570255404;3	15729261957652;0	0118549527510057;0	0314529128145243;0	115466441747201
1934;12;130;2063;"AGAACCATAAGGTCCGCCAGAAACTGAAGGCCAAGGAGTGGGACGAGTTCCTGGCTAAGG";"A_33_P3416366";"CHAF1A";"NM_005483";"ref|Homo sapiens chromatin assembly factor 1	subunit A (p150) (CHAF1A)	mRNA [NM_005483]";8	03019075248876;-0	631739195308233;-3	96025046562529;0	00341955438107175;0	0108940956324016;0	399931944664365
1936;12;132;573;"GCCGATGCCCTGTTGGACCTCATCCGGCAGAAAGAAGAAAGTTGGAGGAACGGACCAAAG";"A_24_P203765";"SLC1A7";"ENST00000371491";"ens|solute carrier family 1 (glutamate transporter)	member 7 [Source:HGNC Symbol;Acc:10945] [ENST00000371491]";6	83168820990987;0	125917949398349;1	16542831777421;0	274314990721737;0	405338249675154;0	148803278316455
1937;12;133;814;"CTTTGACTGCAAGTTCATTGAGACATCAGCGGCATTGCACCACAATGTCCAGGCGCTGTT";"A_24_P262127";"RRAD";"NM_004165";"ref|Homo sapiens Ras-related associated with diabetes (RRAD)	transcript variant 2	mRNA [NM_004165]";8	35703601138404;-0	920638908072508;-11	6789322271645;1	12939822411834e-06;1	45376139408513e-05;5	3.36887e+07
1938;12;134;318;"GTGCAGCTTCTGCAGACCCTGGTGCATCCAGTCATACCAATTCCACATCCACAGCACATG";"A_21_P0002549";"XLOC_002515";"TCONS_00004611";"linc|BROAD Institute lincRNA (XLOC_002515)	lincRNA [TCONS_00004611]";6	10064215493968;0	0121994127407818;0	0578744873197595;0	955135130049302;0	971557598918289;0	356667439868227
1939;12;135;638;"TTGAACTCTACCCCTTGAGATATCCTGAGAAATAGGAATCTATGGTTCCTATTGTTTGGA";"A_21_P0000908";"FLJ27354";"NR_033981";"ref|Homo sapiens uncharacterized LOC400761 (FLJ27354)	non-coding RNA [NR_033981]";6	05935012203729;1	16950152434304;1	7583781339563;0	113141797335097;0	204959455600566;0	752424399615936
1940;12;136;4175;"AGTTTCTGTGGAATTCTGTTTGTTAAATCAAATTAGCTGGTCTCTGAATTAAGGGGGAGA";"A_23_P100795";"STAT3";"NM_213662";"ref|Homo sapiens signal transducer and activator of transcription 3 (acute-phase response factor) (STAT3)	transcript variant 3	mRNA [NM_213662]";8	29097799991247;-0	0384442603095252;-0	392986090146822;0	703634283850708;0	794155136585149;0	291541417348174
1941;12;137;4595;"CCCAACCCCTGCCCTGGGCTGAGGCATATGAATGCTATAGTTGTGCATTAAAATAAATGT";"A_23_P3453";"RPAP1";"NM_015540";"ref|Homo sapiens RNA polymerase II associated protein 1 (RPAP1)	mRNA [NM_015540]";11	5054356861524;-0	218295850328326;-3	65289865551239;0	0054522534563186;0	0161663610268435;0	593481498765436
1943;12;139;2196;"CTTATCCAGATTCAACTTTAGTTGGCTTACCAAGAGTGAAGCGTGACAAGTACTCAGTCT";"A_23_P27822";"GPATCH1";"NM_018025";"ref|Homo sapiens G patch domain containing 1 (GPATCH1)	mRNA [NM_018025]";8	17448857482455;-0	249646710218606;-1	91455519971153;0	0883934127233874;0	168413263554684;0	618260076590207
1945;12;141;1524;"TACCTGGTTCCTGAATCTGACTATACCAACAATGTTGTGCGCTGTGACATTCGCTACACA";"A_23_P122216";"LOX";"NM_002317";"ref|Homo sapiens lysyl oxidase (LOX)	transcript variant 1	mRNA [NM_002317]";9	54803283530548;0	926889316213312;16	1964081392961;7	05738039689989e-08;1	74966487806039e-06;6	4.23175e+06
1947;12;143;6507;"CAGCTTGGCTCTTAAATTTTACTGGCAGGTGTATGGTTGTTGGAGGGTTCCTAGTGAGTT";"A_23_P407142";"LUZP1";"NM_033631";"ref|Homo sapiens leucine zipper protein 1 (LUZP1)	transcript variant 1	mRNA [NM_033631]";8	31980701257969;0	66780276375553;6	10100608907408;0	000192387549333418;0	000937675085599988;0	34422886772902
1948;12;144;2701;"TATGAAAGGAGTCAGAGTGGGGTGAAAGTCTATAAATGTAAGACATTTGGGAAAGCCTTC";"A_23_P101811";"ZNF14";"NM_021030";"ref|Homo sapiens zinc finger protein 14 (ZNF14)	mRNA [NM_021030]";8	2510969146564;-0	8519695578831;-16	0883121136786;7	47474713557978e-08;1	82640366608168e-06;6	7.0489e+06
1950;12;146;3876;"AGCATTCCTTTTTGGGTCTCAAGATTTATGGAACAATAAATGTCATTTAATGCTGTGTGC";"A_23_P211738";"UBP1";"NM_014517";"ref|Homo sapiens upstream binding protein 1 (LBP-1a) (UBP1)	transcript variant 1	mRNA [NM_014517]";11	301361075115;0	307237614121808;4	59383301142829;0	00136271788630742;0	00494388518392026;0	181494424367072
1951;12;147;606;"TGCCCACCCCCCGTGTTCATGGCCTCGGTCACTCTTGCCCAGATCATCGTGTTCCTGTGT";"A_23_P26468";"RHBDL1";"NM_003961";"ref|Homo sapiens rhomboid	veinlet-like 1 (Drosophila) (RHBDL1)	mRNA [NM_003961]";10	9363486677396;-0	0423354905655202;-0	573863338487909;0	580359318221004;0	695720515595362;0	255405192072477
1952;12;148;643;"AGACTCTCAGCCTTCAGCTTCCTAAATTCTGTGTCTGTGACTTTCGAAGTTTTTTAAACC";"A_23_P121702";"OCIAD2";"NM_001014446";"ref|Homo sapiens OCIA domain containing 2 (OCIAD2)	transcript variant 1	mRNA [NM_001014446]";14	5453854024362;-0	585572533751243;-11	6302032184769;1	16953707801687e-06;1	48993282543875e-05;5	469676
1953;12;149;346;"TGTTTTATGTAATGACTGACAGACGATCTCGCCCAGCTCAGCAATGTGAACAGACACCTT";"A_21_P0005818";"XLOC_007054";"ENST00000521989";"linc|BROAD Institute lincRNA (XLOC_007054)	lincRNA [TCONS_00014976]";8	43124644169171;-3	86836989508556;-49	9899046359777;3	72897493055826e-12;1	84612943485177e-09;6	7773.05
1954;12;150;4771;"AAAGGTGTTTGTGCCATTTGGAAAACAGCGTGCATGTGTTCAAGCCTTAGATTGGCGATG";"A_23_P85240";"TLR7";"NM_016562";"ref|Homo sapiens toll-like receptor 7 (TLR7)	mRNA [NM_016562]";5	95914059233906;-0	121719093623582;-0	575073880961982;0	579575245147355;0	695118757737016;0	255184281407998
1956;12;152;169;"TGAAGGGAGAACGAAGCTCGAGCGGAAAGACAGGACCGCGACCGCTTGTCAGGGGATTCG";"A_19_P00316187";"LOC100505687";"NR_038301";"ref|Homo sapiens uncharacterized LOC100505687 (LOC100505687)	transcript variant 1	non-coding RNA [NR_038301]";7	49094573482888;0	916328381326347;6	41274705662586;0	000133325294513796;0	000691332255471151;0	253794222732398
1957;12;153;745;"TGACCACCTATGACAGCGTGACCATCTCCTGGACCCGCCAGAATGGCGAAGCTGTGAAAA";"A_24_P417352";"ENST00000390559";"ENST00000390559";"ens|immunoglobulin heavy constant mu [Source:HGNC Symbol;Acc:5541] [ENST00000390559]";6	03538959683794;-0	346828769576668;-3	21410372386333;0	0108304912276587;0	0291159545410782;0	106887259973553
1958;12;154;1451;"ATTGCCAGAATCTCTTGAAGCCATGTAGCTTATGTGAGAAAAGACCACGAGACGGGAACA";"A_23_P103503";"MDM4";"NM_002393";"ref|Homo sapiens Mdm4 p53 binding protein homolog (mouse) (MDM4)	transcript variant 1	mRNA [NM_002393]";9	49545035354263;-0	0118615104493145;-0	201859557541304;0	844593261040274;0	897145111083545;0	329349953432226
1961;12;157;128;"TTATTTTCATGTGGTCATTGCTGGGGAATCAAAGGATTCCCCCTTTGAGGGAGGGACTTT";"A_23_P350234";"UBE2NL";"NM_001012989";"ref|Homo sapiens ubiquitin-conjugating enzyme E2N-like (UBE2NL)	mRNA [NM_001012989]";10	3242490370932;0	462777876319423;5	34402104159339;0	000494250828003733;0	0020854841171472;0	76559977687056
1964;12;160;0;"ACGGGGAGAGTTCAGAACACCGTGGATATCTTGGAAATGGCACCGATGGGGAGAGCTTAG";"A_33_P3276062";"A_33_P3276062";"A_33_P3276062";"Unknown";5	49586944048622;-0	32008330728017;-2	67971791308806;0	0255970211290652;0	0607054418109895;0	222855078699418
1965;12;161;1098;"CGGTGGGGTCAAATACATCATTGTCACTCAGGTGGGGCCAGGGCCTCAAATCCTGGATGA";"A_23_P152125";"MVD";"NM_002461";"ref|Homo sapiens mevalonate (diphospho) decarboxylase (MVD)	mRNA [NM_002461]";8	23188804332427;0	287016711377486;2	86139341155727;0	0190664121063343;0	0472112297308279;0	173316625384567
1966;12;162;463;"TCAAAACGAGTTACCACGTACAATTGATCCAATAATTTGACTAACGGAACAAGTTACCCT";"A_21_P0000109";"MTRNR2L9";"ENST00000544932";"Unknown";10	3765714899805;-0	0669274036017207;-0	640229284652643;0	538254954036773;0	66042797197176;0	242448985261185
1968;12;164;5912;"CACTAGCCTGAATTTTGCTTGAAGATCACTTTGTCTTGGAAATGACTAGAGAGGCAGAGG";"A_23_P501547";"ADCY6";"NM_015270";"ref|Homo sapiens adenylate cyclase 6 (ADCY6)	transcript variant 1	mRNA [NM_015270]";8	53463693635205;0	0818783867451192;0	813170567672328;0	437463546256314;0	570522066371693;0	209443727296951
1969;13;1;4575;"CTGCCTGAATGCAACAGTAATTTATATCCAGGACAAATACAGTCTGGGCGTCACTATCCT";"A_33_P3216427";"DGKQ";"NM_001347";"ref|Homo sapiens diacylglycerol kinase	theta 110kDa (DGKQ)	mRNA [NM_001347]";10	6152662548438;-0	191103456535981;-3	16284958295608;0	0117504514105191;0	0312426279757502;0	114694467392082
1972;13;4;5817;"CGGTGGGGCTGGTTCTGTAATTGTGTGTGATGTGAAGCCAATTCAGACAGGCAAATAAAA";"A_23_P211212";"COL18A1";"NM_030582";"ref|Homo sapiens collagen	type XVIII	alpha 1 (COL18A1)	transcript variant 1	mRNA [NM_030582]";12	6069460510352;-1	34470291868015;-22	9594599767242;3	4453922139192e-09;2	03140639070012e-07;7	457474
1973;13;5;2518;"GAGTGATTGGTGGTATATTACGGAAATACGGAACCTTTAGGGATAGTTCCGTGTAAGGGC";"A_23_P500773";"MAP3K7";"NM_003188";"ref|Homo sapiens mitogen-activated protein kinase kinase kinase 7 (MAP3K7)	transcript variant A	mRNA [NM_003188]";10	5499598770997;0	201712219558058;3	15699726577949;0	0118605339152483;0	0314625324699275;0	115501756358181
1974;13;6;235;"TCAGGACAAAGCCAGCTCTGTCTCCTGTACCAACCTTGCATGAAAAACAACCAAGGAAAT";"A_21_P0007934";"XLOC_010372";"ENST00000426509";"linc|BROAD Institute lincRNA (XLOC_010372)	lincRNA [TCONS_00021544]";7	17292961640518;-0	13733670387877;-1	96853376914375;0	0810972924390116;0	157268342213293;0	577346078626606
1975;13;7;1430;"GTTACCCATATTGCATGTTGTGGTAGTAGATGCAGCCCCCCAAAATAAAAGTCAAAAGAT";"A_32_P148726";"MGC21881";"AK127789";"gb|Homo sapiens cDNA FLJ45890 fis	clone OCBBF3022576. [AK127789]";7	19645574936808;0	333567335469022;3	53596285703979;0	00653215458250766;0	0188676720640065;0	692649030673521
1977;13;9;1762;"TATGGTTGGGGGGCTTCTTTTGCTGCTGGCCACGGCAAACAAGCTGCTTGCTGCTTCCTT";"A_33_P3329444";"MAMSTR";"NM_182574";"ref|Homo sapiens MEF2 activating motif and SAP domain containing transcriptional regulator (MAMSTR)	transcript variant 2	mRNA [NM_182574]";9	1057964182133;-0	404741362944973;-4	39225844445752;0	00181468942099305;0	00630702079787844;0	231536345727677
1978;13;10;1158;"GCCTCCTGAAGACACAGAGCGGTTGCCTCTCTCATTAATTAATTAATTAGTTAATAAAAT";"A_33_P3865368";"LOC254896";"BC021569";"gb|Homo sapiens hypothetical protein MGC31957	mRNA (cDNA clone MGC:31957 IMAGE:3959651)	complete cds. [BC021569]";9	6531555011348;-0	920364582409997;-15	2300464197605;1	1953507771008e-07;2	58684519213879e-06;9	4.96539e+06
1980;13;12;331;"CACGAGGTTTACTTGACTGTTGTGTGAAAAGCTGATAAGAAAACCATCCAGAAAAAAGCT";"A_19_P00316659";"SNHG5";"NR_003038";"ref|Homo sapiens small nucleolar RNA host gene 5 (non-protein coding) (SNHG5)	non-coding RNA [NR_003038]";14	8654391866412;0	283779143992431;4	52475474582866;0	00150226403580079;0	00538519067306108;0	19769514156458
1985;13;17;570;"CGTGGAGTCCAGCACATCACCCAGAAGGCAGATGTTCTATCTCCATTTTACTCATTAAAA";"A_19_P00315529";"XLOC_008370";"AF088007";"linc|BROAD Institute lincRNA (XLOC_008370)	lincRNA [TCONS_00018105]";6	08222093528049;0	302834638681207;3	88893310629915;0	00380619834328369;0	0119077836561218;0	43714533403499
1987;13;19;471;"TCTTAGGAAATACAGCCCTACTTCCATCCAGCACACCAACCCAAGGAAGTGCCTCGGAGC";"A_21_P0007310";"MRPL23-AS1";"NR_024471";"ref|Homo sapiens MRPL23 antisense RNA 1 (non-protein coding) (MRPL23-AS1)	non-coding RNA [NR_024471]";6	71942981722436;0	119257976114209;0	990538853670581;0	348236089815043;0	483131596044323;0	177361908004665
1988;13;20;2152;"TATTGGTAATGTTAAGACTGCTGGGTGGGTTTGGAGTTCTTGGCTTTAATCATTCATTAC";"A_23_P10291";"CTSE";"NM_001910";"ref|Homo sapiens cathepsin E (CTSE)	transcript variant 1	mRNA [NM_001910]";7	70321501962546;-0	248353853606714;-1	70645920093738;0	122702994856211;0	21862228322018;0	802581855580196
1990;13;22;254;"ACCATATATACCATTACATTTTGTTTCTCCCATCTCTCAGGTAGACTTACACTTTCGGCC";"A_24_P389285";"C7orf54";"NR_027330";"ref|Homo sapiens chromosome 7 open reading frame 54 (C7orf54)	non-coding RNA [NR_027330]";6	57726948625654;0	521114459226192;2	28786332180894;0	0484331778149028;0	103445992740869;0	379759444386952
1991;13;23;556;"AGAGATATGAGGAAATTGTTAAGGAAGTCAGCACTTACATTAAGAAAATTGGCTACAACC";"A_32_P47701";"EEF1A1";"NM_001402";"ref|Homo sapiens eukaryotic translation elongation factor 1 alpha 1 (EEF1A1)	mRNA [NM_001402]";14	7316049041901;0	0568421630610345;0	650762212368002;0	531741231152432;0	65470740811468;0	240348915365402
1994;13;26;1694;"ATCCTTGAGATGTGGGTATAGCTCAGGGTAAGCTGCTCTGAGGTAAAGGTCCATGAACCC";"A_23_P210920";"GSS";"NM_000178";"ref|Homo sapiens glutathione synthetase (GSS)	mRNA [NM_000178]";13	1940213156325;-0	0332726833703081;-0	519690013279358;0	616035138274928;0	725012279182504;0	266158459135061
1995;13;27;491;"ACTTCAGCCTTGTTCCTGTTCAATGGAGAACAGCTTACGCTGGAGTCTGTGGTTTTCTCT";"A_23_P357351";"MPV17L";"NM_173803";"ref|Homo sapiens MPV17 mitochondrial membrane protein-like (MPV17L)	nuclear gene encoding mitochondrial protein	transcript variant 2	mRNA [NM_173803]";6	11261658188373;0	049212898135405;0	151079402870746;0	883302954346419;0	92388222688603;0	339165386560792
1996;13;28;1910;"CGGAGCTCATATCTTATTGAACACCAGAGAATACACACTAGGGCCCAGTGGTTTTACGAA";"A_23_P255805";"ZNF7";"NM_003416";"ref|Homo sapiens zinc finger protein 7 (ZNF7)	mRNA [NM_003416]";9	87675121899757;0	311298003067687;5	90266147007448;0	000244523699904216;0	00114906142858027;0	421830675236702
1998;13;30;883;"GGTTGGGGGGACTCTGAGCGGGAGGCAGAGTTTGCCTTCCTTTCTCCAGGACCAATAAAA";"A_23_P202658";"GSTP1";"NM_000852";"ref|Homo sapiens glutathione S-transferase pi 1 (GSTP1)	mRNA [NM_000852]";15	3317962483205;-0	857244654467456;-15	787777386109;8	78636480927856e-08;2	06082521547073e-06;7	565473
2000;13;32;2147;"TGACATGGAGATGACTCAGCTCACCCAGGAGAATGCAGACTTCGCCACTCGGGATCGCTA";"A_33_P3298861";"SLC12A8";"NM_024628";"ref|Homo sapiens solute carrier family 12 (potassium/chloride transporters)	member 8 (SLC12A8)	transcript variant 1	mRNA [NM_024628]";6	60305087554379;-0	730930293047695;-8	52307202473145;1	4854659142583e-05;0	000114854140126939;4	2.16398e+07
2003;13;35;291;"TGACATCTGTGCATCCCATTGTGTGAAAAATAATCTGCTGATTTTGCCCTTTGTTCTAAA";"A_21_P0003521";"XLOC_004118";"ENST00000512989";"linc|BROAD Institute lincRNA (XLOC_004118)	lincRNA [TCONS_00007870]";5	81016400131476;0	150447928138373;1	12856796459548;0	288763344571363;0	421233201645805;0	154638456624476
2004;13;36;491;"GGGAATTTGTATTCGGCAATAAAACCCAGAGTAAACTCTTAAGATAAAATGACGACGTCC";"A_32_P16489";"MRPL35";"NM_145644";"ref|Homo sapiens mitochondrial ribosomal protein L35 (MRPL35)	nuclear gene encoding mitochondrial protein	transcript variant 2	mRNA [NM_145644]";11	3409761498342;0	281526393077169;5	22727149134661;0	000575691845045731;0	00237327229997074;0	871249379638617
2006;13;38;1320;"GGATGCCAAAGCCTGCTCAAGTTATGGACATTGTGGCCACCATGTGGCTTAAATGATTTT";"A_23_P20022";"HILPDA";"NM_013332";"ref|Homo sapiens chromosome 7 open reading frame 68 (C7orf68)	transcript variant 1	mRNA [NM_013332]";11	2573062403616;-0	0613675415687354;-1	14264151832414;0	283176963588419;0	415021846712908;0	152358212957507
2007;13;39;369;"CGTTCCTGGCCTGGCTCTGTTCATCACTACAGAGACCCCAATGAACACCTGCAGCTCAGT";"A_32_P191860";"SCGBL";"NM_001025591";"ref|Homo sapiens secretoglobin-like (SCGBL)	mRNA [NM_001025591]";7	24432662641727;0	235331611465124;2	57172107946799;0	0305131299869595;0	0703879944788787;0	258400591135225
2008;13;40;728;"CTGACTTTCCATTATGTATACCCTTTTGAGAACTTTGAGTTTTGTACCTGGGCAAAATAA";"A_33_P3217119";"OSCP1";"NM_206837";"ref|Homo sapiens organic solute carrier partner 1 (OSCP1)	transcript variant 2	mRNA [NM_206837]";7	22966597924411;-0	24241580379983;-4	52446465745805;0	00150288140865098;0	00538620377886052;0	197732333579979
2010;13;42;1776;"ATGGGCCAGCAAGTCCTGGATAATTTCTTTCGGTCTCACATCTCCACTGATGCACACAGC";"A_23_P51660";"MUTYH";"NM_012222";"ref|Homo sapiens mutY homolog (E. coli) (MUTYH)	transcript variant alpha1	mRNA [NM_012222]";11	1696631392548;0	716734028453605;9	42101001031057;6	63575442500295e-06;5	96651475932377e-05;2	1.90361e+07
2012;13;44;1533;"TCTAGCAGGCACAGTTGATTCAAGGCTGCTCCTCTCCAGTGAGCTGGGATGGGTTTCTGC";"A_33_P3278826";"LTK";"ENST00000360087";"ens|leukocyte receptor tyrosine kinase [Source:HGNC Symbol;Acc:6721] [ENST00000360087]";8	5505465800488;0	0710849120138359;0	759923748845338;0	467073595134634;0	597583822019423;0	21937833860148
2014;13;46;313;"GGAAACGCCAGACTTCTATCCTCATTCAAAAATCTGGGCCTTGCTGAGAACCAAGGTTTT";"A_23_P214079";"SPINK1";"NM_003122";"ref|Homo sapiens serine peptidase inhibitor	Kazal type 1 (SPINK1)	mRNA [NM_003122]";6	25992711702334;0	788129779663902;5	3366412183017;0	000499010786577305;0	00210278026909509;0	77194934815866
2016;13;48;1322;"GCCTTTGCTGATCTCTGCATTGGAATCTACCTGCTGCTCATTGCATCAGTTGATATCCAT";"A_23_P108699";"FSHR";"NM_000145";"ref|Homo sapiens follicle stimulating hormone receptor (FSHR)	transcript variant 1	mRNA [NM_000145]";6	32566872928058;0	0263020513115784;0	336860697977519;0	744077876346042;0	824925457657659;0	302837476020429
2017;13;49;1582;"GGATACCACATCGGAAGTGATTTTCTAAATTGGATTTGAATTCGGCTCCTGTTTTCTATT";"A_23_P126908";"TNFRSF14";"NM_003820";"ref|Homo sapiens tumor necrosis factor receptor superfamily	member 14 (TNFRSF14)	mRNA [NM_003820]";10	4864737620385;-0	382698983361868;-7	66895560989106;3	41525532947749e-05;0	000226091167460576;8	3.00008e+08
2018;13;50;1068;"TGAAGAATACTCAGAAGTTTATTTTGTGAATGAGTAGACTGGAAAATGTTTGTGTCCAGC";"A_23_P92334";"TMEM156";"NM_024943";"ref|Homo sapiens transmembrane protein 156 (TMEM156)	mRNA [NM_024943]";6	91166703797109;3	08694631701862;39	3612313748519;3	06147522482831e-11;7	35210990559516e-09;2	69902.5
2020;13;52;0;"TGTGGCAGCATCCCCAGCTTTGGCTGTTGGTGACCATCCCTGACTTAAGTGCCATGCAGA";"A_33_P3293734";"A_33_P3293734";"A_33_P3293734";"Unknown";11	3826762685807;0	125204792162664;1	91304783577095;0	0886058289025214;0	16869811703249;0	619305799054627
2021;13;53;106;"CTTCCAGAACATCTGGGAGAATATTTAATGGAAAATCGCTTGGTTAAAACCTGACACTTT";"A_19_P00317984";"SNHG5";"NR_003038";"ref|Homo sapiens small nucleolar RNA host gene 5 (non-protein coding) (SNHG5)	non-coding RNA [NR_003038]";13	646323321139;0	319551477870156;5	73848904393568;0	000299382581768548;0	00136596221201076;0	501456882903338
2024;13;56;509;"AACTTCCAGTAAAAGAAGGCACTGAGGTTTAAGTGCTACGTGGGAGCAGTTGCCGATTTT";"A_21_P0012956";"XLOC_l2_011793";"ENST00000510311";"gb|DA537977 FEKID2 Homo sapiens cDNA clone FEKID2000691 5'	mRNA sequence [DA537977]";7	43510516480432;1	21653832185718;7	30225532934263;4	9917925523972e-05;0	000308677717786591;0	113318336936367
2026;13;58;2323;"GTCTGCATTCGCTGGCTTCTCCTTTGTGAACCCCAAATTCGAGCACCTCCTGGAAGATTG";"A_23_P144054";"PRKCD";"NM_006254";"ref|Homo sapiens protein kinase C	delta (PRKCD)	transcript variant 1	mRNA [NM_006254]";10	1289912406833;0	328884900544779;5	5535028432294;0	00037771845732071;0	00166483768751958;0	611176729475292
2027;13;59;1533;"AGACAATATTGAACAACCCCCTATTTTGTGGGGATTGAGAAGGGGTGAATAGAGGCTTGA";"A_23_P104942";"TMX2";"NM_015959";"ref|Homo sapiens thioredoxin-related transmembrane protein 2 (TMX2)	transcript variant 1	mRNA [NM_015959]";12	5624419051096;0	167536949796997;3	00018798340176;0	0152441130439187;0	0389669995832316;0	143051322908405
2028;13;60;2151;"AAAGGCTAAACATCTGTGGTTGGGCAGTTGGTGAGTTTATAGCCTGGATAAAAGTCAGGT";"A_21_P0014063";"LOC100506546";"XR_108325";"ref|PREDICTED: Homo sapiens hypothetical LOC100506546	transcript variant 2 (LOC100506546)	miscRNA [XR_108325]";6	66253466606421;0	364502536711525;2	11831535723638;0	0637446750651332;0	129485143516979;0	47535148395309
2031;13;63;2863;"ACAGTTTGTCCTGACCACACATATGTTATCAGTGTAATGCTTTATGAAGCTTTAGAAATG";"A_24_P322369";"VPS4B";"NM_004869";"ref|Homo sapiens vacuolar protein sorting 4 homolog B (S. cerevisiae) (VPS4B)	mRNA [NM_004869]";11	4196823321594;-0	0714955383851699;-1	01777471790795;0	335818453974002;0	47048237292058;0	172718265638129
2033;13;65;5117;"TACTTGAATTGTCCAGACAATATAATCTCAGCTTGTATTAGTTTTTGAATGCTCCCATCG";"A_32_P121303";"NUP50";"NM_007172";"ref|Homo sapiens nucleoporin 50kDa (NUP50)	transcript variant 2	mRNA [NM_007172]";11	1194207829576;0	0494594881604158;0	703526118987294;0	499829126075483;0	62676562917018;0	230091239677831
2034;13;66;633;"TAAAAATAGACAGCTCCAAGGAGAATCCGGGTTAGGGGGTGGCAGCTGGAGGCTTCTTAA";"A_33_P3393010";"PKDCC";"ENST00000492861";"ens|protein kinase domain containing	cytoplasmic homolog (mouse) [Source:HGNC Symbol;Acc:25123] [ENST00000492861]";6	36599868570842;0	154504103388621;1	201334138654;0	260804854002813;0	390249242156167;0	143263969388255
2035;13;67;2833;"GGTGGTTCTGCTTATTCTTCAAGTTTATCTGAATCTGTGGGGAGTGCATGATCCCCATGT";"A_23_P165608";"SEMA4F";"NM_004263";"ref|Homo sapiens sema domain	immunoglobulin domain (Ig)	transmembrane domain (TM) and short cytoplasmic domain	(semaphorin) 4F (SEMA4F)	mRNA [NM_004263]";8	30178766838653;-0	210093117917072;-3	26110468679419;0	010052598578272;0	027299421920814;0	100218607082277
2036;13;68;865;"TTGCTATCACCTGCCCAACACACAATCCTGGATGCTTTTGATTGGTTGGATTTCTTTTTT";"A_33_P3417960";"LOC645206";"NR_038840";"ref|Homo sapiens uncharacterized LOC645206 (LOC645206)	non-coding RNA [NR_038840]";6	70307261517183;-0	318815505467795;-1	18985133245719;0	265065518610228;0	394971679425687;0	144997618132017
2037;13;69;331;"AGTGAACAATGTAGCCCAGAAGAGCCAGCACAGATCCCTCCCACCTATCAGCCCTGTCTT";"A_21_P0010023";"XLOC_013694";"THC2758301";"linc|BROAD Institute lincRNA (XLOC_013694)	lincRNA [TCONS_00028345]";8	99766662128373;0	0343845799734801;0	220468765266654;0	83051140391764;0	887577861182613;0	325837730860405
2038;13;70;3215;"ATAAAACAGTCTGAGCAGGAGCTAGCCTATCTGGAAAGGAGAGAACGAGAGGGAAAGTTT";"A_23_P57941";"RBM6";"NM_005777";"ref|Homo sapiens RNA binding motif protein 6 (RBM6)	transcript variant 1	mRNA [NM_005777]";9	46733409294793;0	077493003087687;0	869764290062856;0	407415551620241;0	542164934709261;0	199033571930654
2039;13;71;6971;"TGTATTTTCTGTTGATCTATGGAATGTTCTGTACAAAGCTGTATAATTGTACTGTTGGGC";"A_24_P880043";"PCGF5";"NM_032373";"ref|Homo sapiens polycomb group ring finger 5 (PCGF5)	mRNA [NM_032373]";10	9800965613479;-0	578448286875396;-7	32136387091214;4	89232494692347e-05;0	000303416054526733;0	111386733533304
2041;13;73;519;"GGTCTGTGGTCCTGTGTGCTCCTCGCAGCTCCACCTTCAATAAACTCTGAGAAGGCTGCA";"A_21_P0013410";"XLOC_l2_013696";"ENST00000420313";"linc|BROAD Institute lincRNA (XLOC_l2_013696)	lincRNA [TCONS_l2_00027263]";8	96040464191842;-0	102265020509472;-0	615041508357382;0	554020900481444;0	6734470833204;0	247228416886494
2043;13;75;4030;"TATTTATGTTCACACAGGAATTTGGTTTACTGCTTTGTAAATAAAAGGGAAAACTCCGGG";"A_23_P200222";"LRP8";"NM_033300";"ref|Homo sapiens low density lipoprotein receptor-related protein 8	apolipoprotein e receptor (LRP8)	transcript variant 2	mRNA [NM_033300]";11	1695413313786;-0	495429200182324;-7	85124934603554;2	84253463118505e-05;0	000194771252786885;7	1.50226e+07
2047;13;79;2373;"AGACAACCTGGGAGACAGCCTGGATCAGCCACATCAACTCAGTTGTCCACCACAGGGGAA";"A_23_P256021";"LAS1L";"NM_031206";"ref|Homo sapiens LAS1-like (S. cerevisiae) (LAS1L)	transcript variant 1	mRNA [NM_031206]";12	9178625265381;-1	3929662295889;-27	3759009415588;7	41427329311764e-10;6	81689470207216e-08;2	502543
2048;13;80;612;"TAATGTTGCACAAGAACCATTGCTGGACTGCATCATTGCTTACCCAACATGACTCAGCCT";"A_21_P0013522";"XLOC_l2_014579";"BQ652687";"gb|AGENCOURT_8492923 NIH_MGC_100 Homo sapiens cDNA clone IMAGE:6300203 5'	mRNA sequence [BQ652687]";6	19825270788508;0	0995219373838809;0	575863110204014;0	579064373512216;0	694790885146275;0	255063916462397
2051;13;83;971;"ATTTGCCTGATCCATCATCTCCTCTGTTATCTCTGCATTTTCATCTGCCATTTCTTGAGG";"A_19_P00802390";"XLOC_007231";"TCONS_00015178";"linc|BROAD Institute lincRNA (XLOC_007231)	lincRNA [TCONS_00015178]";7	49852020154421;0	00164763871445839;0	0151696553893162;0	988233530059317;0	99264459834906;0	364408664999757
2052;13;84;1780;"ATCTGGAAGTGTGCTAGTATGCTCCCTAGTGGATAACTTAATCTTTTAATACAGTTCCGT";"A_24_P190168";"TMEM97";"NM_014573";"ref|Homo sapiens transmembrane protein 97 (TMEM97)	mRNA [NM_014573]";10	7385140002669;-0	19595327187243;-2	76616518455029;0	022245176089653;0	0538475828618198;0	197679268257494
2054;13;86;205;"GCCTATGAAAATTTTTAAGGGCTTGCTAGTTTATGTGGACCTGAATAAGCATTTTGCATG";"A_21_P0010650";"XLOC_l2_001089";"ENST00000422716";"tc|Q5VUR7_HUMAN (Q5VUR7) Ankyrin repeat domain 20A	partial (14%) [THC2716686]";6	47667142277951;-0	361327070694516;-2	7883414060327;0	0214596415378207;0	0522526683328595;0	191824195099852
2055;13;87;5509;"CACATTTGGGTATTCCTGAGACTTTATAGAGCGTGTATTGTTTGTTATACGAACCTAACC";"A_24_P233917";"KIAA0494";"NM_014774";"ref|Homo sapiens KIAA0494 (KIAA0494)	mRNA [NM_014774]";11	7903018923272;-0	553462326673619;-9	17591107054223;8	21473362240997e-06;7	09664773071551e-05;2	6.05243e+08
2056;13;88;169;"GATTTTGTACCACCCTAACCTTTGCTTGATCCAGGTTCCAGTCCAATATGCACCATTCAG";"A_21_P0013126";"XLOC_l2_012432";"ENST00000431001";"linc|BROAD Institute lincRNA (XLOC_l2_012432)	lincRNA [TCONS_l2_00025105]";6	70524327610729;0	403866948650331;1	25603453662042;0	241269174581029;0	368627957364805;0	135326603346567
2058;13;90;1212;"CCCAGCACCCACTTTTCTAATCATGAATGAACAATAAAGCCCACGCTCTTTGTCAGGCTC";"A_33_P3271111";"NINJ1";"NM_004148";"ref|Homo sapiens ninjurin 1 (NINJ1)	mRNA [NM_004148]";13	8416738980601;-0	322253258174275;-6	26328107607281;0	000158711962123149;0	000800525225881339;0	29387993381239
2060;13;92;130;"TAAAACCTCTTCATCTGCTGGCTTCTTGCTTTTCAGTAGAGTACCAGGGTCAGACTTCAG";"A_21_P0002308";"XLOC_001733";"TCONS_00003923";"linc|BROAD Institute lincRNA (XLOC_001733)	lincRNA [TCONS_00003923]";6	76239873828903;0	00834527396773321;0	112866160753281;0	912657050368901;0	944145891174456;0	346604358035205
2061;13;93;619;"GGTGACATCCTGTTCTTGTTGTATAACTTTATATTCCTATAAATCCATTAAGGCCCCAAT";"A_33_P3390853";"LOC550643";"NR_015367";"ref|Homo sapiens uncharacterized LOC550643 (LOC550643)	non-coding RNA [NR_015367]";12	7061179072504;0	0401442061410915;0	481342671764543;0	64195881047608;0	745314231732177;0	273611486570882
2062;13;94;6110;"ATAGCCCATAGCTATTTTCCTTGCTTTTCTTTTTTAAAGGGGTCTGTTCTGCAGTGGAGA";"A_32_P70724";"KDM5B";"NM_006618";"ref|Homo sapiens lysine (K)-specific demethylase 5B (KDM5B)	mRNA [NM_006618]";11	0701496731251;0	0708785618223775;0	905264271784073;0	389321351224628;0	524506450741376;0	192550985333841
2066;13;98;3396;"AGAAACAAACAGTGGCTTCTCCATGCTTTGAATTTTCCCTTCTCCCTTACTCCCTTTTTT";"A_33_P3358099";"CD300E";"NM_181449";"ref|Homo sapiens CD300e molecule (CD300E)	mRNA [NM_181449]";8	15307545623314;0	280449737373651;0	799562978026588;0	444907747381447;0	577034899481902;0	211834646285483
2067;13;99;150;"GGGACTCTGGCCAATGCCATTCTGTTCTTCCATAATATCTTTCCCATCTTGACTGAGCAT";"A_24_P15877";"AF333762";"AF333762";"gb|Homo sapiens FKSG41 (FKSG41) mRNA	complete cds. [AF333762]";6	55080224459945;-0	319538668152719;-2	33604467442527;0	0447843790444658;0	0969108545256479;0	355768370476324
2068;13;100;298;"CTGGAACTGTCACACTATTCAGGGAAGGACCTTCCAGGATGTGGCCACTGAAATCTCCCC";"A_33_P3257594";"CCDC103";"NM_213607";"ref|Homo sapiens coiled-coil domain containing 103 (CCDC103)	mRNA [NM_213607]";6	05188602509791;-0	0545181770101753;-0	212579555073411;0	836473784709121;0	891610678765801;0	327318214080806
2069;13;101;497;"TTACCTTTTAAAAGTGTTCCAGTAGCTGTGTTGGAAACCCTCTAACCACGGCAGCCCATT";"A_21_P0014598";"LOC730081";"ENST00000454219";"ref|PREDICTED: Homo sapiens hypothetical LOC730081 (LOC730081)	miscRNA [XR_110479]";6	20955651507205;-0	461585836300314;-5	05076366783649;0	000727673977051312;0	00289557914943875;0	106299287177208
2070;13;102;823;"TTTTGTCTTTGGTGTCTTAAAATTTTGCAGCCAGGCAAGAGAGGTTCACAGGGAAGGTAG";"A_21_P0006460";"LOC100506992";"XR_113296";"ref|PREDICTED: Homo sapiens hypothetical LOC100506992 (LOC100506992)	miscRNA [XR_113296]";6	64080400482239;0	0842285477033426;0	637575678177175;0	539903394399722;0	661945793110948;0	243006190907556
2071;13;103;2040;"GAAGAACTCATGGTAACGAGTCATGTTTTTCTCTCATAGGATAATAGTAACAGCGAATAT";"A_21_P0004937";"XLOC_005458";"TCONS_00011946";"linc|BROAD Institute lincRNA (XLOC_005458)	lincRNA [TCONS_00011946]";6	42049482069658;0	326804504885605;2	36092323982173;0	0430080317145373;0	0937922513264984;0	34431970062655
2074;13;106;5445;"ATTAGCCATGAGAATTTGGTTGTAGTTTTCAGGTAGGTTGGTTTCTTCCTCATTTGCAGC";"A_23_P358009";"DNAJC16";"NM_015291";"ref|Homo sapiens DnaJ (Hsp40) homolog	subfamily C	member 16 (DNAJC16)	mRNA [NM_015291]";8	78545305002717;0	0263992825338786;0	227763759252646;0	825008307438661;0	883898233232658;0	324486906697186
[truncated: 30,914 more rows]
[truncated: 1 more columns]
